# Supplementary material for: Who Benefits from National Estuaries? Applying the FEGS Classification System to Identify Ecosystem Services and their Beneficiaries
Source: MDPI journal article supplement (doi:10.3390/ijerph16132351), 2019-07-03
Supplement: s1 [file s1]

## **AppendixB\_FEGS\_Combinations\_Counts.xlsx**

This excel file contains counts of the number of management plans flagged as matching key words to the given subclasses in each row.

|                             |                                                                                                                                                             |
|-----------------------------|-------------------------------------------------------------------------------------------------------------------------------------------------------------|
| <b>Beneficiary_SubClass</b> | Subclass of Beneficiaries from the FEGS Classification System                                                                                               |
| <b>Ecosystem_SubClass</b>   | Subclass of Ecosystems from the FEGS Classification System                                                                                                  |
| <b>FEGS_SubClass</b>        | Subclass of FEGS types from the FEGS Classification System                                                                                                  |
| <b>NEP_Count</b>            | Number of NEP management plans (out of 28) with atleast one sentence flagged as containing synonym keywords associated with that combination of subclasses  |
| <b>NERR_Count</b>           | Number of NERR management plans (out of 29) with atleast one sentence flagged as containing synonym keywords associated with that combination of subclasses |

| Beneficiary_SubClass                     | Ecosystem_SubClass                | FEGS_SubClass                    | NEP_Count | NERR_Count |
|------------------------------------------|-----------------------------------|----------------------------------|-----------|------------|
| All Humans                               | Aquatic                           | Air                              | 2         | 0          |
| All Humans                               | Atmosphere                        | Air                              | 3         | 0          |
| Commercial_Military Transportation       | Atmosphere                        | Air                              | 2         | 2          |
| Commercial_Military Transportation       | Terrestrial                       | Air                              | 1         | 0          |
| Commerical_Industrial                    | Aquatic                           | Air                              | 1         | 0          |
| Commerical_Industrial                    | Atmosphere                        | Air                              | 4         | 1          |
| Educators and Students                   | Atmosphere                        | Air                              | 1         | 0          |
| Electric and other Energy Generators     | Atmosphere                        | Air                              | 2         | 0          |
| Electric and other Energy Generators     | Terrestrial                       | Air                              | 1         | 0          |
| Experiencers and Viewers                 | Atmosphere                        | Air                              | 3         | 2          |
| Government and Municipal and Residential | Aquatic                           | Air                              | 1         | 0          |
| Government and Municipal and Residential | Atmosphere                        | Air                              | 9         | 7          |
| Government and Municipal and Residential | Terrestrial                       | Air                              | 0         | 1          |
| Industrial Dischargers                   | Aquatic                           | Air                              | 1         | 1          |
| Industrial Dischargers                   | Atmosphere                        | Air                              | 1         | 2          |
| Industrial Processors                    | Aquatic                           | Air                              | 0         | 1          |
| Industrial Processors                    | Atmosphere                        | Air                              | 3         | 1          |
| People Who Care (Existence)              | Atmosphere                        | Air                              | 7         | 8          |
| People Who Care (Existence)              | Estuaries and Near Coastal Marine | Air                              | 3         | 0          |
| People Who Care (Option_Request)         | Aquatic                           | Air                              | 2         | 0          |
| People Who Care (Option_Request)         | Atmosphere                        | Air                              | 2         | 0          |
| Recreational                             | Atmosphere                        | Air                              | 0         | 2          |
| Researchers                              | Atmosphere                        | Air                              | 1         | 0          |
| Resource-Dependent Businesses            | Aquatic                           | Air                              | 1         | 0          |
| Resource-Dependent Businesses            | Atmosphere                        | Air                              | 2         | 0          |
| Experiencers and Viewers                 | Atmosphere                        | Atmospheric Phenomena            | 0         | 1          |
| Experiencers and Viewers                 | Barren_Rock and Sand              | Atmospheric Phenomena            | 0         | 2          |
| Experiencers and Viewers                 | Estuaries and Near Coastal Marine | Atmospheric Phenomena            | 2         | 4          |
| Experiencers and Viewers                 | Lakes and Ponds                   | Atmospheric Phenomena            | 0         | 1          |
| Experiencers and Viewers                 | Rivers and Streams                | Atmospheric Phenomena            | 0         | 2          |
| Agricultural                             | Agroecosystems                    | Depredators and (Pest) Predators | 1         | 0          |
| Agricultural                             | Aquatic                           | Depredators and (Pest) Predators | 1         | 0          |
| Agricultural                             | Estuaries and Near Coastal Marine | Depredators and (Pest) Predators | 1         | 0          |
| Agricultural Processors                  | Agroecosystems                    | Depredators and (Pest) Predators | 1         | 0          |
| All Humans                               | Wetlands                          | Depredators and (Pest) Predators | 1         | 0          |
| Commercial_Military Transportation       | Aquatic                           | Depredators and (Pest) Predators | 1         | 0          |
| Educators and Students                   | Agroecosystems                    | Depredators and (Pest) Predators | 1         | 0          |
| Educators and Students                   | Aquatic                           | Depredators and (Pest) Predators | 2         | 0          |
| Educators and Students                   | Terrestrial                       | Depredators and (Pest) Predators | 1         | 0          |
| Farmers                                  | Agroecosystems                    | Depredators and (Pest) Predators | 2         | 0          |
| Farmers                                  | Estuaries and Near Coastal Marine | Depredators and (Pest) Predators | 1         | 0          |
| Government and Municipal and Residential | Agroecosystems                    | Depredators and (Pest) Predators | 2         | 0          |
| Government and Municipal and Residential | Aquatic                           | Depredators and (Pest) Predators | 2         | 0          |
| Government and Municipal and Residential | Created Greenspace                | Depredators and (Pest) Predators | 3         | 0          |
| Government and Municipal and Residential | Estuaries and Near Coastal Marine | Depredators and (Pest) Predators | 1         | 0          |
| Government and Municipal and Residential | Forests                           | Depredators and (Pest) Predators | 1         | 1          |
| Government and Municipal and Residential | Terrestrial                       | Depredators and (Pest) Predators | 2         | 0          |
| Industrial Processors                    | Created Greenspace                | Depredators and (Pest) Predators | 1         | 0          |
| Learning                                 | Agroecosystems                    | Depredators and (Pest) Predators | 1         | 0          |
| Learning                                 | Created Greenspace                | Depredators and (Pest) Predators | 2         | 0          |
| People Who Care (Existence)              | Agroecosystems                    | Depredators and (Pest) Predators | 1         | 0          |
| People Who Care (Existence)              | Aquatic                           | Depredators and (Pest) Predators | 1         | 0          |
| People Who Care (Existence)              | Estuaries and Near Coastal Marine | Depredators and (Pest) Predators | 1         | 0          |
| Recreational                             | Created Greenspace                | Depredators and (Pest) Predators | 3         | 0          |
| Researchers                              | Terrestrial                       | Depredators and (Pest) Predators | 1         | 0          |
| Residential Property Owners              | Agroecosystems                    | Depredators and (Pest) Predators | 1         | 0          |
| Residential Property Owners              | Created Greenspace                | Depredators and (Pest) Predators | 3         | 0          |
| Residential Property Owners              | Terrestrial                       | Depredators and (Pest) Predators | 2         | 0          |
| Resource-Dependent Businesses            | Created Greenspace                | Depredators and (Pest) Predators | 3         | 0          |
| Resource-Dependent Businesses            | Terrestrial                       | Depredators and (Pest) Predators | 3         | 0          |
| Agricultural                             | Agroecosystems                    | Fauna                            | 8         | 8          |
| All Humans                               | Aquatic                           | Fauna                            | 3         | 1          |
| All Humans                               | Created Greenspace                | Fauna                            | 1         | 0          |
| All Humans                               | Rivers and Streams                | Fauna                            | 1         | 0          |
| All Humans                               | Terrestrial                       | Fauna                            | 1         | 2          |
| Aquaculturists                           | Aquatic                           | Fauna                            | 2         | 3          |
| Aquaculturists                           | Estuaries and Near Coastal Marine | Fauna                            | 1         | 1          |
| Aquaculturists                           | Lakes and Ponds                   | Fauna                            | 1         | 0          |
| Aquaculturists                           | Open Oceans and Seas              | Fauna                            | 3         | 2          |
| Aquaculturists                           | Rivers and Streams                | Fauna                            | 2         | 1          |
| Artists                                  | Created Greenspace                | Fauna                            | 0         | 1          |
| Artists                                  | Estuaries and Near Coastal Marine | Fauna                            | 1         | 0          |
| Artists                                  | Rivers and Streams                | Fauna                            | 1         | 0          |
| Artists                                  | Terrestrial                       | Fauna                            | 0         | 1          |
| Boaters                                  | Aquatic                           | Fauna                            | 12        | 20         |
| Boaters                                  | Estuaries and Near Coastal Marine | Fauna                            | 2         | 5          |
| Boaters                                  | Open Oceans and Seas              | Fauna                            | 1         | 0          |

|                                          |                                   |       |    |    |
|------------------------------------------|-----------------------------------|-------|----|----|
| Boaters                                  | Rivers and Streams                | Fauna | 0  | 1  |
| Boaters                                  | Terrestrial                       | Fauna | 0  | 1  |
| Boaters                                  | Wetlands                          | Fauna | 0  | 2  |
| Commercial_Military Transportation       | Aquatic                           | Fauna | 0  | 1  |
| Commercial_Military Transportation       | Rivers and Streams                | Fauna | 1  | 0  |
| Commercial_Military Transportation       | Terrestrial                       | Fauna | 0  | 2  |
| Commerical_Industrial                    | Agroecosystems                    | Fauna | 2  | 0  |
| Commerical_Industrial                    | Aquatic                           | Fauna | 2  | 1  |
| Commerical_Industrial                    | Estuaries and Near Coastal Marine | Fauna | 3  | 1  |
| Commerical_Industrial                    | Forests                           | Fauna | 0  | 1  |
| Commerical_Industrial                    | Open Oceans and Seas              | Fauna | 1  | 1  |
| Commerical_Industrial                    | Terrestrial                       | Fauna | 2  | 1  |
| Commerical_Industrial                    | Wetlands                          | Fauna | 0  | 1  |
| Educators and Students                   | Aquatic                           | Fauna | 5  | 8  |
| Educators and Students                   | Barren_Rock and Sand              | Fauna | 0  | 1  |
| Educators and Students                   | Created Greenspace                | Fauna | 0  | 1  |
| Educators and Students                   | Estuaries and Near Coastal Marine | Fauna | 5  | 15 |
| Educators and Students                   | Forests                           | Fauna | 0  | 1  |
| Educators and Students                   | Lakes and Ponds                   | Fauna | 2  | 0  |
| Educators and Students                   | Open Oceans and Seas              | Fauna | 1  | 4  |
| Educators and Students                   | Rivers and Streams                | Fauna | 0  | 1  |
| Educators and Students                   | Scrublands_Shrublands             | Fauna | 1  | 0  |
| Educators and Students                   | Terrestrial                       | Fauna | 1  | 3  |
| Educators and Students                   | Wetlands                          | Fauna | 0  | 4  |
| Experiencers and Viewers                 | Aquatic                           | Fauna | 13 | 25 |
| Experiencers and Viewers                 | Barren_Rock and Sand              | Fauna | 2  | 11 |
| Experiencers and Viewers                 | Created Greenspace                | Fauna | 4  | 21 |
| Experiencers and Viewers                 | Estuaries and Near Coastal Marine | Fauna | 12 | 19 |
| Experiencers and Viewers                 | Forests                           | Fauna | 1  | 7  |
| Experiencers and Viewers                 | Grasslands                        | Fauna | 1  | 2  |
| Experiencers and Viewers                 | Open Oceans and Seas              | Fauna | 3  | 4  |
| Experiencers and Viewers                 | Rivers and Streams                | Fauna | 5  | 4  |
| Experiencers and Viewers                 | Scrublands_Shrublands             | Fauna | 1  | 1  |
| Experiencers and Viewers                 | Terrestrial                       | Fauna | 6  | 16 |
| Experiencers and Viewers                 | Wetlands                          | Fauna | 5  | 10 |
| Food Extractors                          | Agroecosystems                    | Fauna | 0  | 1  |
| Food Extractors                          | Aquatic                           | Fauna | 16 | 22 |
| Food Extractors                          | Estuaries and Near Coastal Marine | Fauna | 16 | 14 |
| Food Extractors                          | Open Oceans and Seas              | Fauna | 0  | 1  |
| Food Extractors                          | Rivers and Streams                | Fauna | 3  | 3  |
| Food Extractors                          | Terrestrial                       | Fauna | 2  | 4  |
| Food Extractors                          | Wetlands                          | Fauna | 4  | 3  |
| Food Pickers and Gatherers               | Aquatic                           | Fauna | 2  | 1  |
| Food Pickers and Gatherers               | Estuaries and Near Coastal Marine | Fauna | 1  | 1  |
| Food Subsisters                          | Aquatic                           | Fauna | 1  | 1  |
| Food Subsisters                          | Estuaries and Near Coastal Marine | Fauna | 0  | 2  |
| Food Subsisters                          | Forests                           | Fauna | 2  | 2  |
| Food Subsisters                          | Open Oceans and Seas              | Fauna | 0  | 1  |
| Food Subsisters                          | Rivers and Streams                | Fauna | 1  | 0  |
| Food Subsisters                          | Terrestrial                       | Fauna | 0  | 2  |
| Foresters                                | Forests                           | Fauna | 3  | 2  |
| Fur_Hide Trappers and Hunters            | Agroecosystems                    | Fauna | 2  | 1  |
| Fur_Hide Trappers and Hunters            | Aquatic                           | Fauna | 6  | 12 |
| Fur_Hide Trappers and Hunters            | Estuaries and Near Coastal Marine | Fauna | 4  | 3  |
| Fur_Hide Trappers and Hunters            | Forests                           | Fauna | 1  | 0  |
| Fur_Hide Trappers and Hunters            | Rivers and Streams                | Fauna | 0  | 3  |
| Fur_Hide Trappers and Hunters            | Terrestrial                       | Fauna | 3  | 5  |
| Fur_Hide Trappers and Hunters            | Wetlands                          | Fauna | 1  | 3  |
| Government and Municipal and Residential | Aquatic                           | Fauna | 17 | 24 |
| Government and Municipal and Residential | Barren_Rock and Sand              | Fauna | 1  | 2  |
| Government and Municipal and Residential | Created Greenspace                | Fauna | 2  | 8  |
| Government and Municipal and Residential | Estuaries and Near Coastal Marine | Fauna | 20 | 24 |
| Government and Municipal and Residential | Forests                           | Fauna | 0  | 2  |
| Government and Municipal and Residential | Lakes and Ponds                   | Fauna | 2  | 3  |
| Government and Municipal and Residential | Open Oceans and Seas              | Fauna | 4  | 7  |
| Government and Municipal and Residential | Rivers and Streams                | Fauna | 6  | 5  |
| Government and Municipal and Residential | Scrublands_Shrublands             | Fauna | 2  | 0  |
| Government and Municipal and Residential | Terrestrial                       | Fauna | 15 | 26 |
| Government and Municipal and Residential | Wetlands                          | Fauna | 4  | 5  |
| Hunters                                  | Agroecosystems                    | Fauna | 2  | 1  |
| Hunters                                  | Aquatic                           | Fauna | 6  | 23 |
| Hunters                                  | Barren_Rock and Sand              | Fauna | 2  | 3  |
| Hunters                                  | Created Greenspace                | Fauna | 0  | 11 |
| Hunters                                  | Estuaries and Near Coastal Marine | Fauna | 14 | 20 |
| Hunters                                  | Forests                           | Fauna | 4  | 9  |
| Hunters                                  | Grasslands                        | Fauna | 0  | 2  |
| Hunters                                  | Lakes and Ponds                   | Fauna | 2  | 4  |
| Hunters                                  | Open Oceans and Seas              | Fauna | 1  | 2  |

|                                                                       |                                   |       |    |    |
|-----------------------------------------------------------------------|-----------------------------------|-------|----|----|
| Hunters                                                               | Rivers and Streams                | Fauna | 1  | 7  |
| Hunters                                                               | Terrestrial                       | Fauna | 11 | 26 |
| Hunters                                                               | Wetlands                          | Fauna | 4  | 14 |
| Inspirational                                                         | Created Greenspace                | Fauna | 0  | 1  |
| Inspirational                                                         | Estuaries and Near Coastal Marine | Fauna | 0  | 1  |
| Inspirational                                                         | Forests                           | Fauna | 0  | 1  |
| Inspirational                                                         | Open Oceans and Seas              | Fauna | 1  | 2  |
| Inspirational                                                         | Terrestrial                       | Fauna | 0  | 3  |
| Learning                                                              | Aquatic                           | Fauna | 3  | 6  |
| Learning                                                              | Barren_Rock and Sand              | Fauna | 0  | 1  |
| Learning                                                              | Created Greenspace                | Fauna | 0  | 3  |
| Learning                                                              | Estuaries and Near Coastal Marine | Fauna | 5  | 7  |
| Learning                                                              | Forests                           | Fauna | 0  | 2  |
| Learning                                                              | Open Oceans and Seas              | Fauna | 0  | 2  |
| Learning                                                              | Terrestrial                       | Fauna | 6  | 8  |
| Learning                                                              | Wetlands                          | Fauna | 0  | 1  |
| Military_Coast Guard                                                  | Terrestrial                       | Fauna | 0  | 1  |
| Military_Coast Guard                                                  | Wetlands                          | Fauna | 1  | 0  |
| People Who Care (Existence)                                           | Agroecosystems                    | Fauna | 1  | 3  |
| People Who Care (Existence)                                           | Aquatic                           | Fauna | 25 | 29 |
| People Who Care (Existence)                                           | Barren_Rock and Sand              | Fauna | 4  | 9  |
| People Who Care (Existence)                                           | Created Greenspace                | Fauna | 1  | 4  |
| People Who Care (Existence)                                           | Estuaries and Near Coastal Marine | Fauna | 26 | 29 |
| People Who Care (Existence)                                           | Forests                           | Fauna | 8  | 14 |
| People Who Care (Existence)                                           | Grasslands                        | Fauna | 0  | 1  |
| People Who Care (Existence)                                           | Lakes and Ponds                   | Fauna | 4  | 5  |
| People Who Care (Existence)                                           | Open Oceans and Seas              | Fauna | 15 | 21 |
| People Who Care (Existence)                                           | Rivers and Streams                | Fauna | 19 | 11 |
| People Who Care (Existence)                                           | Scrublands_Shrublands             | Fauna | 1  | 5  |
| People Who Care (Existence)                                           | Terrestrial                       | Fauna | 26 | 28 |
| People Who Care (Existence)                                           | Wetlands                          | Fauna | 14 | 17 |
| People Who Care (Option_Bequest)                                      | Aquatic                           | Fauna | 3  | 4  |
| People Who Care (Option_Bequest)                                      | Created Greenspace                | Fauna | 0  | 1  |
| People Who Care (Option_Bequest)                                      | Estuaries and Near Coastal Marine | Fauna | 3  | 10 |
| People Who Care (Option_Bequest)                                      | Forests                           | Fauna | 0  | 1  |
| People Who Care (Option_Bequest)                                      | Lakes and Ponds                   | Fauna | 1  | 1  |
| People Who Care (Option_Bequest)                                      | Open Oceans and Seas              | Fauna | 1  | 3  |
| People Who Care (Option_Bequest)                                      | Rivers and Streams                | Fauna | 3  | 0  |
| People Who Care (Option_Bequest)                                      | Terrestrial                       | Fauna | 5  | 13 |
| People Who Care (Option_Bequest)                                      | Wetlands                          | Fauna | 2  | 1  |
| Pharmaceutical and Food Supplement Suppliers                          | Aquatic                           | Fauna | 2  | 1  |
| Pharmaceutical and Food Supplement Suppliers                          | Estuaries and Near Coastal Marine | Fauna | 2  | 1  |
| Recreational                                                          | Aquatic                           | Fauna | 20 | 25 |
| Recreational                                                          | Barren_Rock and Sand              | Fauna | 0  | 1  |
| Recreational                                                          | Created Greenspace                | Fauna | 3  | 10 |
| Recreational                                                          | Estuaries and Near Coastal Marine | Fauna | 14 | 17 |
| Recreational                                                          | Forests                           | Fauna | 0  | 1  |
| Recreational                                                          | Open Oceans and Seas              | Fauna | 1  | 2  |
| Recreational                                                          | Rivers and Streams                | Fauna | 1  | 1  |
| Recreational                                                          | Terrestrial                       | Fauna | 4  | 13 |
| Recreational                                                          | Wetlands                          | Fauna | 7  | 6  |
| Researchers                                                           | Aquatic                           | Fauna | 1  | 1  |
| Researchers                                                           | Estuaries and Near Coastal Marine | Fauna | 2  | 17 |
| Researchers                                                           | Lakes and Ponds                   | Fauna | 0  | 1  |
| Researchers                                                           | Open Oceans and Seas              | Fauna | 0  | 3  |
| Researchers                                                           | Rivers and Streams                | Fauna | 5  | 3  |
| Researchers                                                           | Scrublands_Shrublands             | Fauna | 0  | 1  |
| Researchers                                                           | Terrestrial                       | Fauna | 0  | 4  |
| Researchers                                                           | Wetlands                          | Fauna | 0  | 1  |
| Residential Property Owners                                           | Agroecosystems                    | Fauna | 1  | 1  |
| Residential Property Owners                                           | Aquatic                           | Fauna | 2  | 0  |
| Residential Property Owners                                           | Estuaries and Near Coastal Marine | Fauna | 0  | 3  |
| Residential Property Owners                                           | Terrestrial                       | Fauna | 4  | 6  |
| Resource-Dependent Businesses                                         | Aquatic                           | Fauna | 1  | 0  |
| Resource-Dependent Businesses                                         | Created Greenspace                | Fauna | 0  | 1  |
| Resource-Dependent Businesses                                         | Estuaries and Near Coastal Marine | Fauna | 3  | 2  |
| Resource-Dependent Businesses                                         | Forests                           | Fauna | 1  | 0  |
| Resource-Dependent Businesses                                         | Open Oceans and Seas              | Fauna | 1  | 0  |
| Resource-Dependent Businesses                                         | Terrestrial                       | Fauna | 1  | 1  |
| Spiritual and Ceremonial Participants and Participants of Celebration | Barren_Rock and Sand              | Fauna | 0  | 1  |
| Spiritual and Ceremonial Participants and Participants of Celebration | Created Greenspace                | Fauna | 1  | 0  |
| Spiritual and Ceremonial Participants and Participants of Celebration | Estuaries and Near Coastal Marine | Fauna | 0  | 5  |
| Spiritual and Ceremonial Participants and Participants of Celebration | Open Oceans and Seas              | Fauna | 0  | 1  |
| Subsistence                                                           | Estuaries and Near Coastal Marine | Fauna | 0  | 1  |
| Subsistence                                                           | Open Oceans and Seas              | Fauna | 0  | 1  |
| Subsistence                                                           | Terrestrial                       | Fauna | 0  | 1  |
| Subsistence                                                           | Wetlands                          | Fauna | 0  | 1  |
| Timber and Fiber and Fur_Hide Subsisters                              | Aquatic                           | Fauna | 1  | 2  |

|                                            |                                   |       |    |    |
|--------------------------------------------|-----------------------------------|-------|----|----|
| Timber and Fiber and Fur_Hide Subsisters   | Terrestrial                       | Fauna | 2  | 3  |
| Timber and Fiber and Ornamental Extractors | Aquatic                           | Fauna | 1  | 0  |
| Agricultural                               | Agroecosystems                    | Fiber | 1  | 0  |
| Agricultural Processors                    | Agroecosystems                    | Fiber | 1  | 0  |
| Artists                                    | Rivers and Streams                | Fiber | 0  | 1  |
| Artists                                    | Terrestrial                       | Fiber | 0  | 2  |
| Building Material Subsisters               | Estuaries and Near Coastal Marine | Fiber | 0  | 1  |
| Building Material Subsisters               | Terrestrial                       | Fiber | 0  | 1  |
| Farmers                                    | Agroecosystems                    | Fiber | 2  | 0  |
| Farmers                                    | Terrestrial                       | Fiber | 1  | 0  |
| Government and Municipal and Residential   | Agroecosystems                    | Fiber | 2  | 0  |
| Government and Municipal and Residential   | Terrestrial                       | Fiber | 1  | 0  |
| Industrial Processors                      | Aquatic                           | Fiber | 1  | 0  |
| Industrial Processors                      | Estuaries and Near Coastal Marine | Fiber | 0  | 1  |
| Industrial Processors                      | Terrestrial                       | Fiber | 0  | 1  |
| Industrial Processors                      | Wetlands                          | Fiber | 0  | 1  |
| People Who Care (Existence)                | Agroecosystems                    | Fiber | 2  | 0  |
| People Who Care (Existence)                | Terrestrial                       | Fiber | 1  | 0  |
| Subsistence                                | Aquatic                           | Fiber | 0  | 1  |
| Subsistence                                | Estuaries and Near Coastal Marine | Fiber | 0  | 2  |
| Subsistence                                | Terrestrial                       | Fiber | 0  | 2  |
| Subsistence                                | Wetlands                          | Fiber | 0  | 1  |
| All Humans                                 | Aquatic                           | Fish  | 20 | 7  |
| All Humans                                 | Barren_Rock and Sand              | Fish  | 3  | 0  |
| All Humans                                 | Estuaries and Near Coastal Marine | Fish  | 12 | 0  |
| All Humans                                 | Open Oceans and Seas              | Fish  | 5  | 1  |
| All Humans                                 | Rivers and Streams                | Fish  | 2  | 0  |
| All Humans                                 | Wetlands                          | Fish  | 0  | 1  |
| Anglers                                    | Aquatic                           | Fish  | 27 | 29 |
| Anglers                                    | Barren_Rock and Sand              | Fish  | 1  | 7  |
| Anglers                                    | Created Greenspace                | Fish  | 3  | 3  |
| Anglers                                    | Estuaries and Near Coastal Marine | Fish  | 23 | 25 |
| Anglers                                    | Ice and Snow                      | Fish  | 0  | 3  |
| Anglers                                    | Lakes and Ponds                   | Fish  | 4  | 2  |
| Anglers                                    | Open Oceans and Seas              | Fish  | 8  | 10 |
| Anglers                                    | Rivers and Streams                | Fish  | 12 | 16 |
| Anglers                                    | Wetlands                          | Fish  | 8  | 9  |
| Aquaculturists                             | Aquatic                           | Fish  | 18 | 14 |
| Aquaculturists                             | Estuaries and Near Coastal Marine | Fish  | 9  | 4  |
| Aquaculturists                             | Lakes and Ponds                   | Fish  | 0  | 2  |
| Aquaculturists                             | Open Oceans and Seas              | Fish  | 7  | 2  |
| Aquaculturists                             | Rivers and Streams                | Fish  | 3  | 1  |
| Aquaculturists                             | Terrestrial                       | Fish  | 6  | 1  |
| Aquaculturists                             | Wetlands                          | Fish  | 1  | 2  |
| Artists                                    | Aquatic                           | Fish  | 0  | 1  |
| Boaters                                    | Aquatic                           | Fish  | 14 | 13 |
| Boaters                                    | Estuaries and Near Coastal Marine | Fish  | 6  | 5  |
| Boaters                                    | Wetlands                          | Fish  | 0  | 1  |
| Commerical_Industrial                      | Aquatic                           | Fish  | 23 | 21 |
| Commerical_Industrial                      | Estuaries and Near Coastal Marine | Fish  | 5  | 5  |
| Commerical_Industrial                      | Rivers and Streams                | Fish  | 2  | 1  |
| Commerical_Industrial                      | Wetlands                          | Fish  | 0  | 1  |
| Educators and Students                     | Aquatic                           | Fish  | 18 | 18 |
| Educators and Students                     | Estuaries and Near Coastal Marine | Fish  | 7  | 8  |
| Educators and Students                     | Open Oceans and Seas              | Fish  | 2  | 4  |
| Educators and Students                     | Rivers and Streams                | Fish  | 2  | 0  |
| Educators and Students                     | Wetlands                          | Fish  | 1  | 3  |
| Experiencers and Viewers                   | Aquatic                           | Fish  | 11 | 16 |
| Experiencers and Viewers                   | Barren_Rock and Sand              | Fish  | 0  | 2  |
| Experiencers and Viewers                   | Estuaries and Near Coastal Marine | Fish  | 6  | 5  |
| Experiencers and Viewers                   | Open Oceans and Seas              | Fish  | 2  | 0  |
| Experiencers and Viewers                   | Rivers and Streams                | Fish  | 1  | 1  |
| Experiencers and Viewers                   | Wetlands                          | Fish  | 1  | 2  |
| Food Extractors                            | Aquatic                           | Fish  | 28 | 29 |
| Food Extractors                            | Barren_Rock and Sand              | Fish  | 4  | 4  |
| Food Extractors                            | Created Greenspace                | Fish  | 2  | 2  |
| Food Extractors                            | Estuaries and Near Coastal Marine | Fish  | 28 | 29 |
| Food Extractors                            | Forests                           | Fish  | 8  | 5  |
| Food Extractors                            | Lakes and Ponds                   | Fish  | 8  | 5  |
| Food Extractors                            | Open Oceans and Seas              | Fish  | 26 | 25 |
| Food Extractors                            | Rivers and Streams                | Fish  | 21 | 19 |
| Food Extractors                            | Terrestrial                       | Fish  | 24 | 19 |
| Food Extractors                            | Wetlands                          | Fish  | 14 | 10 |
| Food Pickers and Gatherers                 | Aquatic                           | Fish  | 22 | 21 |
| Food Pickers and Gatherers                 | Barren_Rock and Sand              | Fish  | 1  | 0  |
| Food Pickers and Gatherers                 | Estuaries and Near Coastal Marine | Fish  | 18 | 16 |
| Food Pickers and Gatherers                 | Forests                           | Fish  | 0  | 1  |
| Food Pickers and Gatherers                 | Open Oceans and Seas              | Fish  | 1  | 1  |

|                                                                       |                                   |      |    |    |
|-----------------------------------------------------------------------|-----------------------------------|------|----|----|
| Food Pickers and Gatherers                                            | Rivers and Streams                | Fish | 0  | 1  |
| Food Pickers and Gatherers                                            | Terrestrial                       | Fish | 3  | 2  |
| Food Pickers and Gatherers                                            | Wetlands                          | Fish | 2  | 3  |
| Food Subsisters                                                       | Aquatic                           | Fish | 8  | 18 |
| Food Subsisters                                                       | Estuaries and Near Coastal Marine | Fish | 7  | 10 |
| Food Subsisters                                                       | Open Oceans and Seas              | Fish | 1  | 1  |
| Food Subsisters                                                       | Rivers and Streams                | Fish | 2  | 1  |
| Food Subsisters                                                       | Wetlands                          | Fish | 0  | 1  |
| Government and Municipal and Residential                              | Aquatic                           | Fish | 25 | 24 |
| Government and Municipal and Residential                              | Barren_Rock and Sand              | Fish | 2  | 0  |
| Government and Municipal and Residential                              | Created Greenspace                | Fish | 0  | 1  |
| Government and Municipal and Residential                              | Estuaries and Near Coastal Marine | Fish | 20 | 21 |
| Government and Municipal and Residential                              | Ice and Snow                      | Fish | 0  | 2  |
| Government and Municipal and Residential                              | Lakes and Ponds                   | Fish | 2  | 1  |
| Government and Municipal and Residential                              | Open Oceans and Seas              | Fish | 11 | 5  |
| Government and Municipal and Residential                              | Rivers and Streams                | Fish | 8  | 3  |
| Government and Municipal and Residential                              | Wetlands                          | Fish | 5  | 2  |
| Industrial Processors                                                 | Aquatic                           | Fish | 16 | 11 |
| Industrial Processors                                                 | Estuaries and Near Coastal Marine | Fish | 5  | 2  |
| Industrial Processors                                                 | Open Oceans and Seas              | Fish | 3  | 0  |
| Industrial Processors                                                 | Rivers and Streams                | Fish | 3  | 0  |
| Inspirational                                                         | Aquatic                           | Fish | 5  | 4  |
| Inspirational                                                         | Estuaries and Near Coastal Marine | Fish | 2  | 1  |
| Learning                                                              | Aquatic                           | Fish | 13 | 19 |
| Learning                                                              | Estuaries and Near Coastal Marine | Fish | 7  | 12 |
| Learning                                                              | Open Oceans and Seas              | Fish | 4  | 5  |
| Learning                                                              | Rivers and Streams                | Fish | 0  | 1  |
| Learning                                                              | Wetlands                          | Fish | 1  | 1  |
| People Who Care (Existence)                                           | Aquatic                           | Fish | 25 | 28 |
| People Who Care (Existence)                                           | Barren_Rock and Sand              | Fish | 1  | 0  |
| People Who Care (Existence)                                           | Estuaries and Near Coastal Marine | Fish | 27 | 29 |
| People Who Care (Existence)                                           | Forests                           | Fish | 1  | 1  |
| People Who Care (Existence)                                           | Lakes and Ponds                   | Fish | 2  | 1  |
| People Who Care (Existence)                                           | Open Oceans and Seas              | Fish | 10 | 5  |
| People Who Care (Existence)                                           | Rivers and Streams                | Fish | 11 | 3  |
| People Who Care (Existence)                                           | Terrestrial                       | Fish | 9  | 7  |
| People Who Care (Existence)                                           | Wetlands                          | Fish | 9  | 7  |
| People Who Care (Option_Bequest)                                      | Aquatic                           | Fish | 19 | 21 |
| People Who Care (Option_Bequest)                                      | Estuaries and Near Coastal Marine | Fish | 13 | 7  |
| People Who Care (Option_Bequest)                                      | Open Oceans and Seas              | Fish | 3  | 1  |
| People Who Care (Option_Bequest)                                      | Rivers and Streams                | Fish | 4  | 1  |
| People Who Care (Option_Bequest)                                      | Wetlands                          | Fish | 2  | 1  |
| Pharmaceutical and Food Supplement Suppliers                          | Aquatic                           | Fish | 6  | 0  |
| Pharmaceutical and Food Supplement Suppliers                          | Estuaries and Near Coastal Marine | Fish | 2  | 0  |
| Pharmaceutical and Food Supplement Suppliers                          | Open Oceans and Seas              | Fish | 2  | 0  |
| Recreational                                                          | Aquatic                           | Fish | 25 | 27 |
| Recreational                                                          | Created Greenspace                | Fish | 1  | 0  |
| Recreational                                                          | Estuaries and Near Coastal Marine | Fish | 17 | 14 |
| Recreational                                                          | Forests                           | Fish | 0  | 1  |
| Recreational                                                          | Open Oceans and Seas              | Fish | 6  | 4  |
| Recreational                                                          | Rivers and Streams                | Fish | 3  | 4  |
| Researchers                                                           | Aquatic                           | Fish | 12 | 15 |
| Researchers                                                           | Estuaries and Near Coastal Marine | Fish | 7  | 7  |
| Researchers                                                           | Open Oceans and Seas              | Fish | 0  | 1  |
| Researchers                                                           | Rivers and Streams                | Fish | 1  | 0  |
| Researchers                                                           | Terrestrial                       | Fish | 1  | 0  |
| Residential Property Owners                                           | Aquatic                           | Fish | 7  | 7  |
| Residential Property Owners                                           | Open Oceans and Seas              | Fish | 0  | 1  |
| Residential Property Owners                                           | Rivers and Streams                | Fish | 0  | 1  |
| Resource-Dependent Businesses                                         | Aquatic                           | Fish | 20 | 14 |
| Resource-Dependent Businesses                                         | Estuaries and Near Coastal Marine | Fish | 8  | 5  |
| Resource-Dependent Businesses                                         | Open Oceans and Seas              | Fish | 0  | 2  |
| Resource-Dependent Businesses                                         | Rivers and Streams                | Fish | 0  | 1  |
| Resource-Dependent Businesses                                         | Terrestrial                       | Fish | 0  | 1  |
| Spiritual and Ceremonial Participants and Participants of Celebration | Aquatic                           | Fish | 4  | 4  |
| Spiritual and Ceremonial Participants and Participants of Celebration | Open Oceans and Seas              | Fish | 0  | 1  |
| Spiritual and Ceremonial Participants and Participants of Celebration | Rivers and Streams                | Fish | 1  | 1  |
| Subsistence                                                           | Aquatic                           | Fish | 7  | 15 |
| Subsistence                                                           | Estuaries and Near Coastal Marine | Fish | 1  | 4  |
| Subsistence                                                           | Open Oceans and Seas              | Fish | 1  | 0  |
| Subsistence                                                           | Rivers and Streams                | Fish | 0  | 1  |
| Subsistence                                                           | Wetlands                          | Fish | 0  | 1  |
| Timber and Fiber and Ornamental Extractors                            | Aquatic                           | Fish | 4  | 1  |
| Timber and Fiber and Ornamental Extractors                            | Estuaries and Near Coastal Marine | Fish | 3  | 0  |
| Transporters of Goods                                                 | Aquatic                           | Fish | 8  | 2  |
| Transporters of Goods                                                 | Estuaries and Near Coastal Marine | Fish | 0  | 1  |
| Waders and Swimmers and Divers                                        | Aquatic                           | Fish | 9  | 1  |
| Waders and Swimmers and Divers                                        | Estuaries and Near Coastal Marine | Fish | 2  | 2  |

|                                          |                                   |       |    |    |
|------------------------------------------|-----------------------------------|-------|----|----|
| Agricultural                             | Agroecosystems                    | Flora | 9  | 11 |
| All Humans                               | Estuaries and Near Coastal Marine | Flora | 1  | 0  |
| All Humans                               | Terrestrial                       | Flora | 3  | 4  |
| Aquaculturists                           | Aquatic                           | Flora | 0  | 2  |
| Aquaculturists                           | Estuaries and Near Coastal Marine | Flora | 1  | 1  |
| Aquaculturists                           | Open Oceans and Seas              | Flora | 0  | 1  |
| Artists                                  | Created Greenspace                | Flora | 0  | 1  |
| Artists                                  | Terrestrial                       | Flora | 0  | 2  |
| Boaters                                  | Aquatic                           | Flora | 4  | 4  |
| Boaters                                  | Estuaries and Near Coastal Marine | Flora | 5  | 1  |
| Boaters                                  | Forests                           | Flora | 1  | 0  |
| Boaters                                  | Terrestrial                       | Flora | 1  | 0  |
| CAFO Operators                           | Terrestrial                       | Flora | 0  | 1  |
| Commercial_Military Transportation       | Agroecosystems                    | Flora | 1  | 2  |
| Commercial_Military Transportation       | Forests                           | Flora | 1  | 2  |
| Commercial_Military Transportation       | Terrestrial                       | Flora | 0  | 1  |
| Commerical_Industrial                    | Aquatic                           | Flora | 2  | 2  |
| Commerical_Industrial                    | Estuaries and Near Coastal Marine | Flora | 1  | 3  |
| Commerical_Industrial                    | Forests                           | Flora | 2  | 1  |
| Commerical_Industrial                    | Open Oceans and Seas              | Flora | 2  | 1  |
| Commerical_Industrial                    | Rivers and Streams                | Flora | 1  | 0  |
| Commerical_Industrial                    | Scrublands_Shrublands             | Flora | 0  | 1  |
| Commerical_Industrial                    | Terrestrial                       | Flora | 1  | 0  |
| Commerical_Industrial                    | Wetlands                          | Flora | 2  | 2  |
| Educators and Students                   | Aquatic                           | Flora | 1  | 1  |
| Educators and Students                   | Created Greenspace                | Flora | 0  | 1  |
| Educators and Students                   | Estuaries and Near Coastal Marine | Flora | 5  | 15 |
| Educators and Students                   | Forests                           | Flora | 1  | 5  |
| Educators and Students                   | Grasslands                        | Flora | 0  | 1  |
| Educators and Students                   | Lakes and Ponds                   | Flora | 1  | 0  |
| Educators and Students                   | Rivers and Streams                | Flora | 1  | 0  |
| Educators and Students                   | Scrublands_Shrublands             | Flora | 1  | 3  |
| Educators and Students                   | Terrestrial                       | Flora | 6  | 8  |
| Educators and Students                   | Wetlands                          | Flora | 0  | 2  |
| Experiencers and Viewers                 | Aquatic                           | Flora | 1  | 2  |
| Experiencers and Viewers                 | Barren_Rock and Sand              | Flora | 0  | 2  |
| Experiencers and Viewers                 | Created Greenspace                | Flora | 0  | 10 |
| Experiencers and Viewers                 | Estuaries and Near Coastal Marine | Flora | 3  | 7  |
| Experiencers and Viewers                 | Forests                           | Flora | 1  | 3  |
| Experiencers and Viewers                 | Grasslands                        | Flora | 0  | 1  |
| Experiencers and Viewers                 | Scrublands_Shrublands             | Flora | 0  | 2  |
| Experiencers and Viewers                 | Terrestrial                       | Flora | 4  | 19 |
| Experiencers and Viewers                 | Wetlands                          | Flora | 0  | 2  |
| Farmers                                  | Agroecosystems                    | Flora | 5  | 3  |
| Farmers                                  | Grasslands                        | Flora | 0  | 1  |
| Farmers                                  | Wetlands                          | Flora | 1  | 0  |
| Food Extractors                          | Aquatic                           | Flora | 9  | 5  |
| Food Extractors                          | Estuaries and Near Coastal Marine | Flora | 2  | 2  |
| Food Pickers and Gatherers               | Aquatic                           | Flora | 1  | 1  |
| Food Pickers and Gatherers               | Forests                           | Flora | 0  | 2  |
| Food Pickers and Gatherers               | Open Oceans and Seas              | Flora | 0  | 2  |
| Food Subsisters                          | Aquatic                           | Flora | 0  | 1  |
| Food Subsisters                          | Forests                           | Flora | 0  | 2  |
| Food Subsisters                          | Open Oceans and Seas              | Flora | 0  | 1  |
| Food Subsisters                          | Terrestrial                       | Flora | 0  | 3  |
| Food Subsisters                          | Wetlands                          | Flora | 0  | 1  |
| Foresters                                | Agroecosystems                    | Flora | 5  | 1  |
| Foresters                                | Aquatic                           | Flora | 2  | 2  |
| Foresters                                | Estuaries and Near Coastal Marine | Flora | 0  | 3  |
| Foresters                                | Forests                           | Flora | 13 | 19 |
| Foresters                                | Rivers and Streams                | Flora | 1  | 1  |
| Foresters                                | Terrestrial                       | Flora | 2  | 1  |
| Foresters                                | Wetlands                          | Flora | 1  | 3  |
| Government and Municipal and Residential | Agroecosystems                    | Flora | 5  | 4  |
| Government and Municipal and Residential | Aquatic                           | Flora | 4  | 5  |
| Government and Municipal and Residential | Created Greenspace                | Flora | 4  | 3  |
| Government and Municipal and Residential | Estuaries and Near Coastal Marine | Flora | 15 | 15 |
| Government and Municipal and Residential | Forests                           | Flora | 10 | 12 |
| Government and Municipal and Residential | Grasslands                        | Flora | 0  | 1  |
| Government and Municipal and Residential | Lakes and Ponds                   | Flora | 2  | 1  |
| Government and Municipal and Residential | Open Oceans and Seas              | Flora | 2  | 1  |
| Government and Municipal and Residential | Rivers and Streams                | Flora | 5  | 0  |
| Government and Municipal and Residential | Terrestrial                       | Flora | 14 | 17 |
| Government and Municipal and Residential | Wetlands                          | Flora | 2  | 2  |
| Industrial Processors                    | Aquatic                           | Flora | 1  | 1  |
| Industrial Processors                    | Estuaries and Near Coastal Marine | Flora | 0  | 1  |
| Industrial Processors                    | Forests                           | Flora | 3  | 1  |
| Inspirational                            | Estuaries and Near Coastal Marine | Flora | 0  | 1  |

|                                                                       |                                   |       |    |    |
|-----------------------------------------------------------------------|-----------------------------------|-------|----|----|
| Inspirational                                                         | Forests                           | Flora | 0  | 2  |
| Learning                                                              | Created Greenspace                | Flora | 1  | 3  |
| Learning                                                              | Estuaries and Near Coastal Marine | Flora | 6  | 9  |
| Learning                                                              | Forests                           | Flora | 0  | 2  |
| Learning                                                              | Open Oceans and Seas              | Flora | 1  | 0  |
| Learning                                                              | Scrublands_Shrublands             | Flora | 0  | 1  |
| Learning                                                              | Terrestrial                       | Flora | 5  | 13 |
| Learning                                                              | Wetlands                          | Flora | 0  | 3  |
| Livestock Grazers                                                     | Agroecosystems                    | Flora | 2  | 2  |
| Livestock Grazers                                                     | Aquatic                           | Flora | 1  | 1  |
| Livestock Grazers                                                     | Forests                           | Flora | 1  | 3  |
| Livestock Grazers                                                     | Grasslands                        | Flora | 0  | 2  |
| Livestock Grazers                                                     | Scrublands_Shrublands             | Flora | 0  | 1  |
| Livestock Grazers                                                     | Terrestrial                       | Flora | 2  | 2  |
| Livestock Grazers                                                     | Wetlands                          | Flora | 0  | 2  |
| Military_Coast Guard                                                  | Estuaries and Near Coastal Marine | Flora | 2  | 0  |
| Military_Coast Guard                                                  | Terrestrial                       | Flora | 0  | 1  |
| People Who Care (Existence)                                           | Agroecosystems                    | Flora | 1  | 4  |
| People Who Care (Existence)                                           | Aquatic                           | Flora | 18 | 19 |
| People Who Care (Existence)                                           | Barren_Rock and Sand              | Flora | 2  | 3  |
| People Who Care (Existence)                                           | Created Greenspace                | Flora | 0  | 1  |
| People Who Care (Existence)                                           | Estuaries and Near Coastal Marine | Flora | 27 | 29 |
| People Who Care (Existence)                                           | Forests                           | Flora | 11 | 19 |
| People Who Care (Existence)                                           | Grasslands                        | Flora | 1  | 4  |
| People Who Care (Existence)                                           | Lakes and Ponds                   | Flora | 2  | 3  |
| People Who Care (Existence)                                           | Open Oceans and Seas              | Flora | 5  | 6  |
| People Who Care (Existence)                                           | Rivers and Streams                | Flora | 6  | 4  |
| People Who Care (Existence)                                           | Scrublands_Shrublands             | Flora | 3  | 6  |
| People Who Care (Existence)                                           | Terrestrial                       | Flora | 21 | 28 |
| People Who Care (Existence)                                           | Wetlands                          | Flora | 11 | 16 |
| People Who Care (Option_Bequest)                                      | Aquatic                           | Flora | 1  | 1  |
| People Who Care (Option_Bequest)                                      | Created Greenspace                | Flora | 3  | 3  |
| People Who Care (Option_Bequest)                                      | Estuaries and Near Coastal Marine | Flora | 8  | 13 |
| People Who Care (Option_Bequest)                                      | Forests                           | Flora | 2  | 3  |
| People Who Care (Option_Bequest)                                      | Grasslands                        | Flora | 0  | 3  |
| People Who Care (Option_Bequest)                                      | Terrestrial                       | Flora | 4  | 8  |
| People Who Care (Option_Bequest)                                      | Wetlands                          | Flora | 1  | 8  |
| Pharmaceutical and Food Supplement Suppliers                          | Terrestrial                       | Flora | 0  | 1  |
| Recreational                                                          | Aquatic                           | Flora | 1  | 1  |
| Recreational                                                          | Created Greenspace                | Flora | 1  | 1  |
| Recreational                                                          | Estuaries and Near Coastal Marine | Flora | 10 | 7  |
| Recreational                                                          | Forests                           | Flora | 1  | 5  |
| Recreational                                                          | Grasslands                        | Flora | 0  | 1  |
| Recreational                                                          | Open Oceans and Seas              | Flora | 1  | 0  |
| Recreational                                                          | Terrestrial                       | Flora | 5  | 7  |
| Recreational                                                          | Wetlands                          | Flora | 0  | 3  |
| Researchers                                                           | Estuaries and Near Coastal Marine | Flora | 1  | 20 |
| Researchers                                                           | Forests                           | Flora | 1  | 0  |
| Researchers                                                           | Terrestrial                       | Flora | 0  | 4  |
| Researchers                                                           | Wetlands                          | Flora | 0  | 1  |
| Residential Property Owners                                           | Aquatic                           | Flora | 1  | 1  |
| Residential Property Owners                                           | Estuaries and Near Coastal Marine | Flora | 1  | 1  |
| Residential Property Owners                                           | Forests                           | Flora | 3  | 2  |
| Residential Property Owners                                           | Terrestrial                       | Flora | 2  | 3  |
| Resource-Dependent Businesses                                         | Created Greenspace                | Flora | 1  | 1  |
| Resource-Dependent Businesses                                         | Estuaries and Near Coastal Marine | Flora | 3  | 2  |
| Resource-Dependent Businesses                                         | Open Oceans and Seas              | Flora | 1  | 0  |
| Resource-Dependent Businesses                                         | Terrestrial                       | Flora | 8  | 9  |
| Resource-Dependent Businesses                                         | Wetlands                          | Flora | 2  | 4  |
| Spiritual and Ceremonial Participants and Participants of Celebration | Estuaries and Near Coastal Marine | Flora | 0  | 1  |
| Spiritual and Ceremonial Participants and Participants of Celebration | Open Oceans and Seas              | Flora | 0  | 1  |
| Spiritual and Ceremonial Participants and Participants of Celebration | Rivers and Streams                | Flora | 1  | 0  |
| Spiritual and Ceremonial Participants and Participants of Celebration | Terrestrial                       | Flora | 1  | 0  |
| Subsistence                                                           | Agroecosystems                    | Flora | 1  | 0  |
| Subsistence                                                           | Open Oceans and Seas              | Flora | 0  | 1  |
| Timber and Fiber and Ornamental Extractors                            | Aquatic                           | Flora | 1  | 0  |
| Timber and Fiber and Ornamental Extractors                            | Forests                           | Flora | 2  | 4  |
| Timber and Fiber and Ornamental Extractors                            | Terrestrial                       | Flora | 6  | 5  |
| Agricultural                                                          | Agroecosystems                    | Fungi | 1  | 0  |
| Educators and Students                                                | Agroecosystems                    | Fungi | 1  | 0  |
| Experiencers and Viewers                                              | Forests                           | Fungi | 0  | 1  |
| Experiencers and Viewers                                              | Rivers and Streams                | Fungi | 0  | 1  |
| Agricultural                                                          | Agroecosystems                    | Land  | 16 | 19 |
| Agricultural                                                          | Aquatic                           | Land  | 1  | 1  |
| Agricultural                                                          | Estuaries and Near Coastal Marine | Land  | 1  | 3  |
| Agricultural                                                          | Forests                           | Land  | 5  | 1  |
| Agricultural                                                          | Grasslands                        | Land  | 1  | 1  |
| Agricultural                                                          | Lakes and Ponds                   | Land  | 0  | 1  |



|                                          |                                   |      |    |    |
|------------------------------------------|-----------------------------------|------|----|----|
| Agricultural                             | Rivers and Streams                | Land | 2  | 2  |
| Agricultural                             | Scrublands_Shrublands             | Land | 0  | 1  |
| Agricultural                             | Terrestrial                       | Land | 1  | 3  |
| Agricultural                             | Wetlands                          | Land | 3  | 5  |
| All Humans                               | Estuaries and Near Coastal Marine | Land | 1  | 0  |
| All Humans                               | Terrestrial                       | Land | 2  | 1  |
| All Humans                               | Wetlands                          | Land | 0  | 1  |
| Anglers                                  | Terrestrial                       | Land | 0  | 1  |
| Aquaculturists                           | Estuaries and Near Coastal Marine | Land | 1  | 0  |
| Aquaculturists                           | Terrestrial                       | Land | 2  | 0  |
| Boaters                                  | Aquatic                           | Land | 2  | 4  |
| Boaters                                  | Estuaries and Near Coastal Marine | Land | 3  | 3  |
| Boaters                                  | Rivers and Streams                | Land | 1  | 3  |
| Boaters                                  | Terrestrial                       | Land | 0  | 4  |
| Commercial_Military Transportation       | Agroecosystems                    | Land | 1  | 0  |
| Commercial_Military Transportation       | Aquatic                           | Land | 2  | 0  |
| Commercial_Military Transportation       | Estuaries and Near Coastal Marine | Land | 6  | 7  |
| Commercial_Military Transportation       | Forests                           | Land | 1  | 0  |
| Commercial_Military Transportation       | Rivers and Streams                | Land | 1  | 1  |
| Commercial_Military Transportation       | Terrestrial                       | Land | 3  | 5  |
| Commerical_Industrial                    | Agroecosystems                    | Land | 2  | 1  |
| Commerical_Industrial                    | Aquatic                           | Land | 1  | 0  |
| Commerical_Industrial                    | Estuaries and Near Coastal Marine | Land | 4  | 7  |
| Commerical_Industrial                    | Forests                           | Land | 1  | 0  |
| Commerical_Industrial                    | Rivers and Streams                | Land | 1  | 2  |
| Commerical_Industrial                    | Terrestrial                       | Land | 4  | 21 |
| Commerical_Industrial                    | Wetlands                          | Land | 4  | 1  |
| Educators and Students                   | Agroecosystems                    | Land | 0  | 1  |
| Educators and Students                   | Estuaries and Near Coastal Marine | Land | 3  | 14 |
| Educators and Students                   | Lakes and Ponds                   | Land | 0  | 1  |
| Educators and Students                   | Rivers and Streams                | Land | 1  | 0  |
| Educators and Students                   | Terrestrial                       | Land | 6  | 16 |
| Electric and other Energy Generators     | Aquatic                           | Land | 0  | 1  |
| Electric and other Energy Generators     | Estuaries and Near Coastal Marine | Land | 1  | 1  |
| Experiencers and Viewers                 | Aquatic                           | Land | 2  | 3  |
| Experiencers and Viewers                 | Barren_Rock and Sand              | Land | 0  | 1  |
| Experiencers and Viewers                 | Created Greenspace                | Land | 0  | 3  |
| Experiencers and Viewers                 | Estuaries and Near Coastal Marine | Land | 1  | 2  |
| Experiencers and Viewers                 | Forests                           | Land | 0  | 1  |
| Experiencers and Viewers                 | Rivers and Streams                | Land | 0  | 2  |
| Experiencers and Viewers                 | Terrestrial                       | Land | 3  | 7  |
| Experiencers and Viewers                 | Wetlands                          | Land | 0  | 1  |
| Farmers                                  | Agroecosystems                    | Land | 13 | 13 |
| Farmers                                  | Aquatic                           | Land | 3  | 4  |
| Farmers                                  | Estuaries and Near Coastal Marine | Land | 2  | 1  |
| Farmers                                  | Forests                           | Land | 1  | 2  |
| Farmers                                  | Grasslands                        | Land | 0  | 1  |
| Farmers                                  | Scrublands_Shrublands             | Land | 0  | 2  |
| Farmers                                  | Terrestrial                       | Land | 3  | 5  |
| Farmers                                  | Wetlands                          | Land | 3  | 1  |
| Foresters                                | Agroecosystems                    | Land | 1  | 4  |
| Foresters                                | Forests                           | Land | 1  | 4  |
| Foresters                                | Terrestrial                       | Land | 1  | 0  |
| Foresters                                | Wetlands                          | Land | 1  | 0  |
| Government and Municipal and Residential | Agroecosystems                    | Land | 9  | 7  |
| Government and Municipal and Residential | Aquatic                           | Land | 14 | 8  |
| Government and Municipal and Residential | Barren_Rock and Sand              | Land | 3  | 2  |
| Government and Municipal and Residential | Created Greenspace                | Land | 7  | 6  |
| Government and Municipal and Residential | Estuaries and Near Coastal Marine | Land | 25 | 27 |
| Government and Municipal and Residential | Forests                           | Land | 8  | 14 |
| Government and Municipal and Residential | Grasslands                        | Land | 0  | 3  |
| Government and Municipal and Residential | Lakes and Ponds                   | Land | 3  | 3  |
| Government and Municipal and Residential | Rivers and Streams                | Land | 13 | 9  |
| Government and Municipal and Residential | Scrublands_Shrublands             | Land | 3  | 3  |
| Government and Municipal and Residential | Terrestrial                       | Land | 25 | 28 |
| Government and Municipal and Residential | Wetlands                          | Land | 20 | 19 |
| Hunters                                  | Aquatic                           | Land | 0  | 1  |
| Hunters                                  | Terrestrial                       | Land | 0  | 1  |
| Industrial Dischargers                   | Estuaries and Near Coastal Marine | Land | 3  | 2  |
| Industrial Dischargers                   | Rivers and Streams                | Land | 0  | 1  |
| Industrial Dischargers                   | Scrublands_Shrublands             | Land | 0  | 1  |
| Industrial Dischargers                   | Terrestrial                       | Land | 6  | 1  |
| Industrial Dischargers                   | Wetlands                          | Land | 2  | 3  |
| Industrial Processors                    | Agroecosystems                    | Land | 1  | 0  |
| Industrial Processors                    | Barren_Rock and Sand              | Land | 1  | 2  |
| Industrial Processors                    | Estuaries and Near Coastal Marine | Land | 3  | 2  |
| Inspirational                            | Estuaries and Near Coastal Marine | Land | 1  | 1  |
| Inspirational                            | Terrestrial                       | Land | 1  | 4  |

|                                            |                                   |                   |    |    |
|--------------------------------------------|-----------------------------------|-------------------|----|----|
| Irrigators                                 | Estuaries and Near Coastal Marine | Land              | 2  | 0  |
| Irrigators                                 | Rivers and Streams                | Land              | 1  | 0  |
| Irrigators                                 | Terrestrial                       | Land              | 2  | 0  |
| Irrigators                                 | Wetlands                          | Land              | 0  | 1  |
| Learning                                   | Created Greenspace                | Land              | 0  | 1  |
| Learning                                   | Estuaries and Near Coastal Marine | Land              | 3  | 19 |
| Learning                                   | Terrestrial                       | Land              | 6  | 25 |
| Learning                                   | Wetlands                          | Land              | 0  | 2  |
| Livestock Grazers                          | Agroecosystems                    | Land              | 2  | 1  |
| Livestock Grazers                          | Estuaries and Near Coastal Marine | Land              | 1  | 0  |
| Livestock Grazers                          | Forests                           | Land              | 0  | 1  |
| Livestock Grazers                          | Grasslands                        | Land              | 0  | 1  |
| Livestock Grazers                          | Scrublands_Shrublands             | Land              | 0  | 1  |
| Livestock Grazers                          | Terrestrial                       | Land              | 2  | 1  |
| Livestock Grazers                          | Wetlands                          | Land              | 1  | 1  |
| Military_Coast Guard                       | Estuaries and Near Coastal Marine | Land              | 2  | 3  |
| Military_Coast Guard                       | Rivers and Streams                | Land              | 2  | 0  |
| Military_Coast Guard                       | Terrestrial                       | Land              | 1  | 1  |
| Military_Coast Guard                       | Wetlands                          | Land              | 1  | 0  |
| People Who Care (Existence)                | Agroecosystems                    | Land              | 3  | 6  |
| People Who Care (Existence)                | Aquatic                           | Land              | 8  | 6  |
| People Who Care (Existence)                | Created Greenspace                | Land              | 3  | 1  |
| People Who Care (Existence)                | Estuaries and Near Coastal Marine | Land              | 25 | 26 |
| People Who Care (Existence)                | Forests                           | Land              | 3  | 2  |
| People Who Care (Existence)                | Rivers and Streams                | Land              | 10 | 9  |
| People Who Care (Existence)                | Scrublands_Shrublands             | Land              | 0  | 1  |
| People Who Care (Existence)                | Terrestrial                       | Land              | 22 | 28 |
| People Who Care (Existence)                | Wetlands                          | Land              | 13 | 14 |
| People Who Care (Option_Bequest)           | Agroecosystems                    | Land              | 2  | 0  |
| People Who Care (Option_Bequest)           | Aquatic                           | Land              | 1  | 1  |
| People Who Care (Option_Bequest)           | Created Greenspace                | Land              | 1  | 1  |
| People Who Care (Option_Bequest)           | Estuaries and Near Coastal Marine | Land              | 7  | 16 |
| People Who Care (Option_Bequest)           | Forests                           | Land              | 0  | 1  |
| People Who Care (Option_Bequest)           | Grasslands                        | Land              | 0  | 1  |
| People Who Care (Option_Bequest)           | Rivers and Streams                | Land              | 2  | 2  |
| People Who Care (Option_Bequest)           | Terrestrial                       | Land              | 15 | 28 |
| People Who Care (Option_Bequest)           | Wetlands                          | Land              | 1  | 3  |
| Recreational                               | Created Greenspace                | Land              | 2  | 2  |
| Recreational                               | Estuaries and Near Coastal Marine | Land              | 3  | 2  |
| Recreational                               | Rivers and Streams                | Land              | 1  | 2  |
| Recreational                               | Terrestrial                       | Land              | 4  | 12 |
| Recreational                               | Wetlands                          | Land              | 0  | 1  |
| Researchers                                | Agroecosystems                    | Land              | 1  | 0  |
| Researchers                                | Aquatic                           | Land              | 0  | 1  |
| Researchers                                | Estuaries and Near Coastal Marine | Land              | 2  | 10 |
| Researchers                                | Forests                           | Land              | 1  | 0  |
| Researchers                                | Terrestrial                       | Land              | 0  | 11 |
| Researchers                                | Wetlands                          | Land              | 1  | 2  |
| Residential Property Owners                | Agroecosystems                    | Land              | 4  | 5  |
| Residential Property Owners                | Aquatic                           | Land              | 1  | 2  |
| Residential Property Owners                | Estuaries and Near Coastal Marine | Land              | 10 | 11 |
| Residential Property Owners                | Forests                           | Land              | 6  | 3  |
| Residential Property Owners                | Rivers and Streams                | Land              | 2  | 2  |
| Residential Property Owners                | Terrestrial                       | Land              | 14 | 17 |
| Residential Property Owners                | Wetlands                          | Land              | 2  | 3  |
| Resource-Dependent Businesses              | Aquatic                           | Land              | 0  | 1  |
| Resource-Dependent Businesses              | Estuaries and Near Coastal Marine | Land              | 6  | 3  |
| Resource-Dependent Businesses              | Rivers and Streams                | Land              | 1  | 1  |
| Resource-Dependent Businesses              | Terrestrial                       | Land              | 2  | 1  |
| Timber and Fiber and Ornamental Extractors | Terrestrial                       | Land              | 0  | 1  |
| Transporters of People                     | Barren_Rock and Sand              | Land              | 1  | 0  |
| Transporters of People                     | Scrublands_Shrublands             | Land              | 1  | 0  |
| Transporters of People                     | Terrestrial                       | Land              | 0  | 3  |
| Waders and Swimmers and Divers             | Estuaries and Near Coastal Marine | Land              | 1  | 2  |
| Waders and Swimmers and Divers             | Terrestrial                       | Land              | 2  | 2  |
| Wastewater Treatment Plant Operators       | Estuaries and Near Coastal Marine | Land              | 0  | 1  |
| Artists                                    | Aquatic                           | Natural Materials | 0  | 1  |
| Commercial_Military Transportation         | Aquatic                           | Natural Materials | 1  | 0  |
| Commercial_Military Transportation         | Barren_Rock and Sand              | Natural Materials | 2  | 3  |
| Commercial_Military Transportation         | Estuaries and Near Coastal Marine | Natural Materials | 2  | 0  |
| Commerical_Industrial                      | Barren_Rock and Sand              | Natural Materials | 2  | 2  |
| Commerical_Industrial                      | Estuaries and Near Coastal Marine | Natural Materials | 2  | 1  |
| Commerical_Industrial                      | Terrestrial                       | Natural Materials | 1  | 2  |
| Experiencers and Viewers                   | Aquatic                           | Natural Materials | 1  | 0  |
| Experiencers and Viewers                   | Barren_Rock and Sand              | Natural Materials | 2  | 5  |
| Experiencers and Viewers                   | Estuaries and Near Coastal Marine | Natural Materials | 2  | 2  |
| Experiencers and Viewers                   | Rivers and Streams                | Natural Materials | 1  | 1  |
| Experiencers and Viewers                   | Terrestrial                       | Natural Materials | 0  | 2  |

|                                          |                                   |                   |    |    |
|------------------------------------------|-----------------------------------|-------------------|----|----|
| Experiencers and Viewers                 | Wetlands                          | Natural Materials | 0  | 1  |
| Food Extractors                          | Aquatic                           | Natural Materials | 5  | 6  |
| Food Extractors                          | Estuaries and Near Coastal Marine | Natural Materials | 1  | 0  |
| Government and Municipal and Residential | Aquatic                           | Natural Materials | 0  | 1  |
| Government and Municipal and Residential | Barren_Rock and Sand              | Natural Materials | 10 | 4  |
| Government and Municipal and Residential | Estuaries and Near Coastal Marine | Natural Materials | 5  | 0  |
| Government and Municipal and Residential | Rivers and Streams                | Natural Materials | 1  | 0  |
| Government and Municipal and Residential | Terrestrial                       | Natural Materials | 9  | 0  |
| Industrial Dischargers                   | Terrestrial                       | Natural Materials | 3  | 1  |
| Industrial Processors                    | Aquatic                           | Natural Materials | 6  | 4  |
| Industrial Processors                    | Barren_Rock and Sand              | Natural Materials | 15 | 4  |
| Industrial Processors                    | Estuaries and Near Coastal Marine | Natural Materials | 4  | 4  |
| Industrial Processors                    | Lakes and Ponds                   | Natural Materials | 4  | 1  |
| Industrial Processors                    | Open Oceans and Seas              | Natural Materials | 1  | 1  |
| Industrial Processors                    | Rivers and Streams                | Natural Materials | 7  | 2  |
| Industrial Processors                    | Terrestrial                       | Natural Materials | 4  | 2  |
| Industrial Processors                    | Wetlands                          | Natural Materials | 2  | 3  |
| Military_Coast Guard                     | Estuaries and Near Coastal Marine | Natural Materials | 2  | 1  |
| Military_Coast Guard                     | Rivers and Streams                | Natural Materials | 1  | 0  |
| People Who Care (Existence)              | Barren_Rock and Sand              | Natural Materials | 5  | 1  |
| People Who Care (Existence)              | Estuaries and Near Coastal Marine | Natural Materials | 5  | 1  |
| People Who Care (Existence)              | Forests                           | Natural Materials | 2  | 3  |
| People Who Care (Existence)              | Terrestrial                       | Natural Materials | 3  | 4  |
| People Who Care (Existence)              | Wetlands                          | Natural Materials | 4  | 3  |
| Subsistence                              | Estuaries and Near Coastal Marine | Natural Materials | 0  | 1  |
| Timber and Fiber and Fur_Hide Subsisters | Aquatic                           | Natural Materials | 0  | 2  |
| Timber and Fiber and Fur_Hide Subsisters | Forests                           | Natural Materials | 3  | 5  |
| Timber and Fiber and Fur_Hide Subsisters | Terrestrial                       | Natural Materials | 1  | 3  |
| Timber and Fiber and Fur_Hide Subsisters | Wetlands                          | Natural Materials | 0  | 2  |
| Agricultural                             | Agroecosystems                    | Open Space        | 2  | 1  |
| Anglers                                  | Aquatic                           | Open Space        | 0  | 1  |
| Anglers                                  | Terrestrial                       | Open Space        | 0  | 1  |
| Commerical_Industrial                    | Agroecosystems                    | Open Space        | 1  | 0  |
| Commerical_Industrial                    | Created Greenspace                | Open Space        | 1  | 0  |
| Commerical_Industrial                    | Terrestrial                       | Open Space        | 0  | 1  |
| Educators and Students                   | Created Greenspace                | Open Space        | 1  | 0  |
| Experiencers and Viewers                 | Aquatic                           | Open Space        | 0  | 1  |
| Experiencers and Viewers                 | Created Greenspace                | Open Space        | 1  | 0  |
| Experiencers and Viewers                 | Terrestrial                       | Open Space        | 0  | 1  |
| Farmers                                  | Agroecosystems                    | Open Space        | 2  | 2  |
| Government and Municipal and Residential | Agroecosystems                    | Open Space        | 5  | 2  |
| Government and Municipal and Residential | Aquatic                           | Open Space        | 10 | 3  |
| Government and Municipal and Residential | Barren_Rock and Sand              | Open Space        | 1  | 0  |
| Government and Municipal and Residential | Created Greenspace                | Open Space        | 6  | 3  |
| Government and Municipal and Residential | Estuaries and Near Coastal Marine | Open Space        | 11 | 7  |
| Government and Municipal and Residential | Forests                           | Open Space        | 5  | 3  |
| Government and Municipal and Residential | Grasslands                        | Open Space        | 0  | 1  |
| Government and Municipal and Residential | Lakes and Ponds                   | Open Space        | 1  | 0  |
| Government and Municipal and Residential | Rivers and Streams                | Open Space        | 7  | 2  |
| Government and Municipal and Residential | Terrestrial                       | Open Space        | 16 | 15 |
| Government and Municipal and Residential | Wetlands                          | Open Space        | 6  | 3  |
| Hunters                                  | Aquatic                           | Open Space        | 0  | 1  |
| Hunters                                  | Terrestrial                       | Open Space        | 0  | 1  |
| People Who Care (Existence)              | Agroecosystems                    | Open Space        | 1  | 0  |
| People Who Care (Existence)              | Aquatic                           | Open Space        | 0  | 1  |
| People Who Care (Existence)              | Barren_Rock and Sand              | Open Space        | 0  | 1  |
| People Who Care (Existence)              | Estuaries and Near Coastal Marine | Open Space        | 2  | 0  |
| People Who Care (Existence)              | Forests                           | Open Space        | 0  | 1  |
| People Who Care (Existence)              | Terrestrial                       | Open Space        | 2  | 0  |
| People Who Care (Option_Bequest)         | Aquatic                           | Open Space        | 0  | 1  |
| People Who Care (Option_Bequest)         | Estuaries and Near Coastal Marine | Open Space        | 1  | 0  |
| Recreational                             | Agroecosystems                    | Open Space        | 1  | 0  |
| Recreational                             | Aquatic                           | Open Space        | 1  | 0  |
| Recreational                             | Created Greenspace                | Open Space        | 4  | 1  |
| Recreational                             | Estuaries and Near Coastal Marine | Open Space        | 1  | 0  |
| Recreational                             | Forests                           | Open Space        | 1  | 0  |
| Recreational                             | Terrestrial                       | Open Space        | 1  | 1  |
| Residential Property Owners              | Agroecosystems                    | Open Space        | 0  | 1  |
| Residential Property Owners              | Created Greenspace                | Open Space        | 1  | 0  |
| Residential Property Owners              | Estuaries and Near Coastal Marine | Open Space        | 1  | 0  |
| Residential Property Owners              | Terrestrial                       | Open Space        | 1  | 0  |
| Resource-Dependent Businesses            | Agroecosystems                    | Open Space        | 1  | 0  |
| Resource-Dependent Businesses            | Terrestrial                       | Open Space        | 1  | 0  |
| Agricultural                             | Agroecosystems                    | Pollinators       | 1  | 1  |
| Artists                                  | Terrestrial                       | Pollinators       | 0  | 1  |
| Experiencers and Viewers                 | Created Greenspace                | Pollinators       | 0  | 2  |
| Experiencers and Viewers                 | Terrestrial                       | Pollinators       | 0  | 1  |
| Government and Municipal and Residential | Aquatic                           | Pollinators       | 0  | 1  |

|                                          |                                   |                             |    |    |
|------------------------------------------|-----------------------------------|-----------------------------|----|----|
| Government and Municipal and Residential | Created Greenspace                | Pollinators                 | 0  | 1  |
| Learning                                 | Created Greenspace                | Pollinators                 | 0  | 2  |
| Learning                                 | Terrestrial                       | Pollinators                 | 0  | 2  |
| People Who Care (Existence)              | Wetlands                          | Pollinators                 | 0  | 1  |
| Recreational                             | Created Greenspace                | Pollinators                 | 0  | 2  |
| Researchers                              | Agroecosystems                    | Pollinators                 | 0  | 1  |
| Agricultural                             | Agroecosystems                    | Presence of the Environment | 25 | 24 |
| Agricultural                             | Aquatic                           | Presence of the Environment | 9  | 2  |
| Agricultural                             | Estuaries and Near Coastal Marine | Presence of the Environment | 10 | 11 |
| Agricultural                             | Forests                           | Presence of the Environment | 4  | 4  |
| Agricultural                             | Groundwater                       | Presence of the Environment | 2  | 4  |
| Agricultural                             | Lakes and Ponds                   | Presence of the Environment | 0  | 1  |
| Agricultural                             | Rivers and Streams                | Presence of the Environment | 5  | 1  |
| Agricultural                             | Scrublands_Shrublands             | Presence of the Environment | 1  | 2  |
| Agricultural                             | Terrestrial                       | Presence of the Environment | 8  | 4  |
| Agricultural                             | Wetlands                          | Presence of the Environment | 10 | 5  |
| Agricultural Processors                  | Agroecosystems                    | Presence of the Environment | 5  | 2  |
| Agricultural Processors                  | Aquatic                           | Presence of the Environment | 0  | 1  |
| Agricultural Processors                  | Estuaries and Near Coastal Marine | Presence of the Environment | 0  | 1  |
| All Humans                               | Agroecosystems                    | Presence of the Environment | 2  | 0  |
| All Humans                               | Aquatic                           | Presence of the Environment | 10 | 4  |
| All Humans                               | Barren_Rock and Sand              | Presence of the Environment | 2  | 2  |
| All Humans                               | Created Greenspace                | Presence of the Environment | 0  | 9  |
| All Humans                               | Estuaries and Near Coastal Marine | Presence of the Environment | 25 | 21 |
| All Humans                               | Groundwater                       | Presence of the Environment | 1  | 0  |
| All Humans                               | Lakes and Ponds                   | Presence of the Environment | 0  | 1  |
| All Humans                               | Open Oceans and Seas              | Presence of the Environment | 5  | 4  |
| All Humans                               | Rivers and Streams                | Presence of the Environment | 8  | 1  |
| All Humans                               | Terrestrial                       | Presence of the Environment | 19 | 15 |
| All Humans                               | Wetlands                          | Presence of the Environment | 4  | 5  |
| Anglers                                  | Aquatic                           | Presence of the Environment | 6  | 10 |
| Anglers                                  | Estuaries and Near Coastal Marine | Presence of the Environment | 6  | 6  |
| Anglers                                  | Rivers and Streams                | Presence of the Environment | 2  | 0  |
| Aquaculturists                           | Aquatic                           | Presence of the Environment | 5  | 2  |
| Aquaculturists                           | Estuaries and Near Coastal Marine | Presence of the Environment | 14 | 6  |
| Aquaculturists                           | Open Oceans and Seas              | Presence of the Environment | 1  | 3  |
| Aquaculturists                           | Rivers and Streams                | Presence of the Environment | 2  | 0  |
| Aquaculturists                           | Terrestrial                       | Presence of the Environment | 1  | 2  |
| Aquaculturists                           | Wetlands                          | Presence of the Environment | 2  | 1  |
| Artists                                  | Created Greenspace                | Presence of the Environment | 1  | 6  |
| Artists                                  | Estuaries and Near Coastal Marine | Presence of the Environment | 6  | 8  |
| Artists                                  | Open Oceans and Seas              | Presence of the Environment | 2  | 1  |
| Artists                                  | Rivers and Streams                | Presence of the Environment | 1  | 0  |
| Artists                                  | Terrestrial                       | Presence of the Environment | 1  | 6  |
| Boaters                                  | Aquatic                           | Presence of the Environment | 25 | 25 |
| Boaters                                  | Barren_Rock and Sand              | Presence of the Environment | 3  | 3  |
| Boaters                                  | Created Greenspace                | Presence of the Environment | 7  | 10 |
| Boaters                                  | Estuaries and Near Coastal Marine | Presence of the Environment | 21 | 19 |
| Boaters                                  | Forests                           | Presence of the Environment | 2  | 0  |
| Boaters                                  | Lakes and Ponds                   | Presence of the Environment | 1  | 1  |
| Boaters                                  | Open Oceans and Seas              | Presence of the Environment | 2  | 4  |
| Boaters                                  | Rivers and Streams                | Presence of the Environment | 11 | 10 |
| Boaters                                  | Terrestrial                       | Presence of the Environment | 8  | 12 |
| Boaters                                  | Wetlands                          | Presence of the Environment | 8  | 11 |
| CAFO Operators                           | Agroecosystems                    | Presence of the Environment | 4  | 3  |
| CAFO Operators                           | Aquatic                           | Presence of the Environment | 3  | 0  |
| CAFO Operators                           | Estuaries and Near Coastal Marine | Presence of the Environment | 2  | 1  |
| CAFO Operators                           | Rivers and Streams                | Presence of the Environment | 1  | 0  |
| CAFO Operators                           | Terrestrial                       | Presence of the Environment | 1  | 0  |
| CAFO Operators                           | Wetlands                          | Presence of the Environment | 1  | 0  |
| Commercial_Military Transportation       | Agroecosystems                    | Presence of the Environment | 1  | 2  |
| Commercial_Military Transportation       | Aquatic                           | Presence of the Environment | 9  | 7  |
| Commercial_Military Transportation       | Barren_Rock and Sand              | Presence of the Environment | 1  | 0  |
| Commercial_Military Transportation       | Created Greenspace                | Presence of the Environment | 3  | 11 |
| Commercial_Military Transportation       | Estuaries and Near Coastal Marine | Presence of the Environment | 24 | 19 |
| Commercial_Military Transportation       | Forests                           | Presence of the Environment | 3  | 2  |
| Commercial_Military Transportation       | Lakes and Ponds                   | Presence of the Environment | 2  | 0  |
| Commercial_Military Transportation       | Open Oceans and Seas              | Presence of the Environment | 0  | 3  |
| Commercial_Military Transportation       | Rivers and Streams                | Presence of the Environment | 9  | 5  |
| Commercial_Military Transportation       | Terrestrial                       | Presence of the Environment | 11 | 11 |
| Commercial_Military Transportation       | Wetlands                          | Presence of the Environment | 4  | 7  |
| Commerical_Industrial                    | Agroecosystems                    | Presence of the Environment | 12 | 10 |
| Commerical_Industrial                    | Aquatic                           | Presence of the Environment | 17 | 8  |
| Commerical_Industrial                    | Barren_Rock and Sand              | Presence of the Environment | 3  | 1  |
| Commerical_Industrial                    | Created Greenspace                | Presence of the Environment | 6  | 3  |
| Commerical_Industrial                    | Estuaries and Near Coastal Marine | Presence of the Environment | 27 | 25 |
| Commerical_Industrial                    | Forests                           | Presence of the Environment | 5  | 5  |
| Commerical_Industrial                    | Groundwater                       | Presence of the Environment | 6  | 2  |

|                                      |                                   |                             |    |    |
|--------------------------------------|-----------------------------------|-----------------------------|----|----|
| Commerical_Industrial                | Lakes and Ponds                   | Presence of the Environment | 1  | 0  |
| Commerical_Industrial                | Open Oceans and Seas              | Presence of the Environment | 6  | 3  |
| Commerical_Industrial                | Rivers and Streams                | Presence of the Environment | 9  | 8  |
| Commerical_Industrial                | Scrublands_Shrublands             | Presence of the Environment | 2  | 2  |
| Commerical_Industrial                | Terrestrial                       | Presence of the Environment | 24 | 21 |
| Commerical_Industrial                | Wetlands                          | Presence of the Environment | 6  | 7  |
| Educators and Students               | Agroecosystems                    | Presence of the Environment | 6  | 3  |
| Educators and Students               | Aquatic                           | Presence of the Environment | 27 | 29 |
| Educators and Students               | Barren_Rock and Sand              | Presence of the Environment | 4  | 6  |
| Educators and Students               | Created Greenspace                | Presence of the Environment | 13 | 28 |
| Educators and Students               | Estuaries and Near Coastal Marine | Presence of the Environment | 28 | 29 |
| Educators and Students               | Forests                           | Presence of the Environment | 1  | 10 |
| Educators and Students               | Grasslands                        | Presence of the Environment | 1  | 1  |
| Educators and Students               | Ice and Snow                      | Presence of the Environment | 0  | 2  |
| Educators and Students               | Lakes and Ponds                   | Presence of the Environment | 1  | 3  |
| Educators and Students               | Open Oceans and Seas              | Presence of the Environment | 14 | 22 |
| Educators and Students               | Rivers and Streams                | Presence of the Environment | 14 | 18 |
| Educators and Students               | Scrublands_Shrublands             | Presence of the Environment | 0  | 1  |
| Educators and Students               | Terrestrial                       | Presence of the Environment | 24 | 29 |
| Educators and Students               | Wetlands                          | Presence of the Environment | 13 | 23 |
| Electric and other Energy Generators | Agroecosystems                    | Presence of the Environment | 2  | 1  |
| Electric and other Energy Generators | Aquatic                           | Presence of the Environment | 6  | 1  |
| Electric and other Energy Generators | Atmosphere                        | Presence of the Environment | 2  | 0  |
| Electric and other Energy Generators | Created Greenspace                | Presence of the Environment | 0  | 2  |
| Electric and other Energy Generators | Estuaries and Near Coastal Marine | Presence of the Environment | 12 | 11 |
| Electric and other Energy Generators | Lakes and Ponds                   | Presence of the Environment | 0  | 2  |
| Electric and other Energy Generators | Rivers and Streams                | Presence of the Environment | 3  | 1  |
| Electric and other Energy Generators | Terrestrial                       | Presence of the Environment | 1  | 4  |
| Electric and other Energy Generators | Wetlands                          | Presence of the Environment | 2  | 0  |
| Experiencers and Viewers             | Agroecosystems                    | Presence of the Environment | 1  | 3  |
| Experiencers and Viewers             | Aquatic                           | Presence of the Environment | 25 | 29 |
| Experiencers and Viewers             | Atmosphere                        | Presence of the Environment | 3  | 5  |
| Experiencers and Viewers             | Barren_Rock and Sand              | Presence of the Environment | 19 | 22 |
| Experiencers and Viewers             | Created Greenspace                | Presence of the Environment | 22 | 29 |
| Experiencers and Viewers             | Estuaries and Near Coastal Marine | Presence of the Environment | 27 | 29 |
| Experiencers and Viewers             | Forests                           | Presence of the Environment | 8  | 24 |
| Experiencers and Viewers             | Grasslands                        | Presence of the Environment | 0  | 6  |
| Experiencers and Viewers             | Ice and Snow                      | Presence of the Environment | 0  | 7  |
| Experiencers and Viewers             | Lakes and Ponds                   | Presence of the Environment | 4  | 10 |
| Experiencers and Viewers             | Open Oceans and Seas              | Presence of the Environment | 13 | 15 |
| Experiencers and Viewers             | Rivers and Streams                | Presence of the Environment | 16 | 24 |
| Experiencers and Viewers             | Scrublands_Shrublands             | Presence of the Environment | 4  | 12 |
| Experiencers and Viewers             | Terrestrial                       | Presence of the Environment | 18 | 26 |
| Experiencers and Viewers             | Wetlands                          | Presence of the Environment | 12 | 26 |
| Farmers                              | Agroecosystems                    | Presence of the Environment | 18 | 18 |
| Farmers                              | Aquatic                           | Presence of the Environment | 1  | 0  |
| Farmers                              | Estuaries and Near Coastal Marine | Presence of the Environment | 7  | 3  |
| Farmers                              | Forests                           | Presence of the Environment | 3  | 1  |
| Farmers                              | Groundwater                       | Presence of the Environment | 2  | 0  |
| Farmers                              | Lakes and Ponds                   | Presence of the Environment | 1  | 0  |
| Farmers                              | Rivers and Streams                | Presence of the Environment | 5  | 2  |
| Farmers                              | Scrublands_Shrublands             | Presence of the Environment | 1  | 1  |
| Farmers                              | Terrestrial                       | Presence of the Environment | 8  | 8  |
| Farmers                              | Wetlands                          | Presence of the Environment | 8  | 6  |
| Food Extractors                      | Aquatic                           | Presence of the Environment | 22 | 19 |
| Food Extractors                      | Estuaries and Near Coastal Marine | Presence of the Environment | 28 | 28 |
| Food Extractors                      | Open Oceans and Seas              | Presence of the Environment | 1  | 1  |
| Food Extractors                      | Rivers and Streams                | Presence of the Environment | 6  | 2  |
| Food Extractors                      | Terrestrial                       | Presence of the Environment | 1  | 1  |
| Food Extractors                      | Wetlands                          | Presence of the Environment | 3  | 1  |
| Food Pickers and Gatherers           | Aquatic                           | Presence of the Environment | 3  | 3  |
| Food Pickers and Gatherers           | Estuaries and Near Coastal Marine | Presence of the Environment | 4  | 2  |
| Food Pickers and Gatherers           | Open Oceans and Seas              | Presence of the Environment | 2  | 0  |
| Food Pickers and Gatherers           | Rivers and Streams                | Presence of the Environment | 0  | 1  |
| Food Pickers and Gatherers           | Terrestrial                       | Presence of the Environment | 2  | 3  |
| Food Pickers and Gatherers           | Wetlands                          | Presence of the Environment | 1  | 1  |
| Food Subsisters                      | Aquatic                           | Presence of the Environment | 2  | 3  |
| Food Subsisters                      | Estuaries and Near Coastal Marine | Presence of the Environment | 2  | 7  |
| Food Subsisters                      | Forests                           | Presence of the Environment | 0  | 1  |
| Food Subsisters                      | Open Oceans and Seas              | Presence of the Environment | 0  | 1  |
| Food Subsisters                      | Terrestrial                       | Presence of the Environment | 0  | 2  |
| Food Subsisters                      | Wetlands                          | Presence of the Environment | 0  | 1  |
| Foresters                            | Agroecosystems                    | Presence of the Environment | 1  | 4  |
| Foresters                            | Aquatic                           | Presence of the Environment | 1  | 0  |
| Foresters                            | Estuaries and Near Coastal Marine | Presence of the Environment | 1  | 2  |
| Foresters                            | Forests                           | Presence of the Environment | 9  | 13 |
| Foresters                            | Rivers and Streams                | Presence of the Environment | 1  | 0  |
| Foresters                            | Terrestrial                       | Presence of the Environment | 0  | 2  |

|                                          |                                   |                             |    |    |
|------------------------------------------|-----------------------------------|-----------------------------|----|----|
| Foresters                                | Wetlands                          | Presence of the Environment | 1  | 2  |
| Fur_Hide Trappers and Hunters            | Aquatic                           | Presence of the Environment | 1  | 0  |
| Fur_Hide Trappers and Hunters            | Estuaries and Near Coastal Marine | Presence of the Environment | 1  | 2  |
| Fur_Hide Trappers and Hunters            | Terrestrial                       | Presence of the Environment | 0  | 2  |
| Government and Municipal and Residential | Agroecosystems                    | Presence of the Environment | 23 | 18 |
| Government and Municipal and Residential | Aquatic                           | Presence of the Environment | 27 | 29 |
| Government and Municipal and Residential | Atmosphere                        | Presence of the Environment | 12 | 7  |
| Government and Municipal and Residential | Barren_Rock and Sand              | Presence of the Environment | 15 | 14 |
| Government and Municipal and Residential | Created Greenspace                | Presence of the Environment | 27 | 27 |
| Government and Municipal and Residential | Estuaries and Near Coastal Marine | Presence of the Environment | 28 | 29 |
| Government and Municipal and Residential | Forests                           | Presence of the Environment | 18 | 16 |
| Government and Municipal and Residential | Grasslands                        | Presence of the Environment | 2  | 3  |
| Government and Municipal and Residential | Groundwater                       | Presence of the Environment | 12 | 4  |
| Government and Municipal and Residential | Ice and Snow                      | Presence of the Environment | 2  | 4  |
| Government and Municipal and Residential | Lakes and Ponds                   | Presence of the Environment | 14 | 9  |
| Government and Municipal and Residential | Open Oceans and Seas              | Presence of the Environment | 17 | 19 |
| Government and Municipal and Residential | Rivers and Streams                | Presence of the Environment | 25 | 23 |
| Government and Municipal and Residential | Scrublands_Shrublands             | Presence of the Environment | 7  | 7  |
| Government and Municipal and Residential | Terrestrial                       | Presence of the Environment | 28 | 29 |
| Government and Municipal and Residential | Wetlands                          | Presence of the Environment | 26 | 28 |
| Hunters                                  | Agroecosystems                    | Presence of the Environment | 1  | 1  |
| Hunters                                  | Aquatic                           | Presence of the Environment | 5  | 14 |
| Hunters                                  | Created Greenspace                | Presence of the Environment | 0  | 7  |
| Hunters                                  | Estuaries and Near Coastal Marine | Presence of the Environment | 7  | 8  |
| Hunters                                  | Forests                           | Presence of the Environment | 0  | 1  |
| Hunters                                  | Rivers and Streams                | Presence of the Environment | 1  | 4  |
| Hunters                                  | Terrestrial                       | Presence of the Environment | 0  | 7  |
| Hunters                                  | Wetlands                          | Presence of the Environment | 0  | 1  |
| Industrial Dischargers                   | Agroecosystems                    | Presence of the Environment | 2  | 1  |
| Industrial Dischargers                   | Aquatic                           | Presence of the Environment | 9  | 0  |
| Industrial Dischargers                   | Atmosphere                        | Presence of the Environment | 1  | 0  |
| Industrial Dischargers                   | Estuaries and Near Coastal Marine | Presence of the Environment | 7  | 4  |
| Industrial Dischargers                   | Groundwater                       | Presence of the Environment | 4  | 3  |
| Industrial Dischargers                   | Open Oceans and Seas              | Presence of the Environment | 1  | 1  |
| Industrial Dischargers                   | Rivers and Streams                | Presence of the Environment | 3  | 0  |
| Industrial Dischargers                   | Terrestrial                       | Presence of the Environment | 8  | 6  |
| Industrial Dischargers                   | Wetlands                          | Presence of the Environment | 4  | 3  |
| Industrial Processors                    | Agroecosystems                    | Presence of the Environment | 0  | 1  |
| Industrial Processors                    | Aquatic                           | Presence of the Environment | 5  | 5  |
| Industrial Processors                    | Barren_Rock and Sand              | Presence of the Environment | 1  | 0  |
| Industrial Processors                    | Estuaries and Near Coastal Marine | Presence of the Environment | 18 | 11 |
| Industrial Processors                    | Groundwater                       | Presence of the Environment | 2  | 0  |
| Industrial Processors                    | Open Oceans and Seas              | Presence of the Environment | 2  | 2  |
| Industrial Processors                    | Rivers and Streams                | Presence of the Environment | 7  | 1  |
| Industrial Processors                    | Terrestrial                       | Presence of the Environment | 7  | 7  |
| Industrial Processors                    | Wetlands                          | Presence of the Environment | 3  | 0  |
| Inspirational                            | Aquatic                           | Presence of the Environment | 4  | 9  |
| Inspirational                            | Barren_Rock and Sand              | Presence of the Environment | 0  | 1  |
| Inspirational                            | Created Greenspace                | Presence of the Environment | 2  | 10 |
| Inspirational                            | Estuaries and Near Coastal Marine | Presence of the Environment | 23 | 28 |
| Inspirational                            | Forests                           | Presence of the Environment | 0  | 2  |
| Inspirational                            | Lakes and Ponds                   | Presence of the Environment | 0  | 3  |
| Inspirational                            | Open Oceans and Seas              | Presence of the Environment | 3  | 7  |
| Inspirational                            | Rivers and Streams                | Presence of the Environment | 5  | 9  |
| Inspirational                            | Terrestrial                       | Presence of the Environment | 16 | 24 |
| Inspirational                            | Wetlands                          | Presence of the Environment | 1  | 6  |
| Irrigators                               | Aquatic                           | Presence of the Environment | 2  | 1  |
| Irrigators                               | Estuaries and Near Coastal Marine | Presence of the Environment | 2  | 1  |
| Irrigators                               | Groundwater                       | Presence of the Environment | 3  | 0  |
| Irrigators                               | Rivers and Streams                | Presence of the Environment | 2  | 0  |
| Irrigators                               | Terrestrial                       | Presence of the Environment | 4  | 0  |
| Irrigators                               | Wetlands                          | Presence of the Environment | 3  | 1  |
| Learning                                 | Agroecosystems                    | Presence of the Environment | 10 | 3  |
| Learning                                 | Aquatic                           | Presence of the Environment | 21 | 25 |
| Learning                                 | Atmosphere                        | Presence of the Environment | 1  | 1  |
| Learning                                 | Barren_Rock and Sand              | Presence of the Environment | 7  | 6  |
| Learning                                 | Created Greenspace                | Presence of the Environment | 12 | 29 |
| Learning                                 | Estuaries and Near Coastal Marine | Presence of the Environment | 28 | 29 |
| Learning                                 | Forests                           | Presence of the Environment | 6  | 12 |
| Learning                                 | Grasslands                        | Presence of the Environment | 1  | 2  |
| Learning                                 | Groundwater                       | Presence of the Environment | 2  | 0  |
| Learning                                 | Lakes and Ponds                   | Presence of the Environment | 2  | 4  |
| Learning                                 | Open Oceans and Seas              | Presence of the Environment | 11 | 22 |
| Learning                                 | Rivers and Streams                | Presence of the Environment | 17 | 13 |
| Learning                                 | Scrublands_Shrublands             | Presence of the Environment | 0  | 3  |
| Learning                                 | Terrestrial                       | Presence of the Environment | 24 | 29 |
| Learning                                 | Wetlands                          | Presence of the Environment | 11 | 23 |
| Livestock Grazers                        | Agroecosystems                    | Presence of the Environment | 5  | 6  |

|                                          |                                   |                             |    |    |
|------------------------------------------|-----------------------------------|-----------------------------|----|----|
| Livestock Grazers                        | Aquatic                           | Presence of the Environment | 1  | 1  |
| Livestock Grazers                        | Estuaries and Near Coastal Marine | Presence of the Environment | 2  | 1  |
| Livestock Grazers                        | Forests                           | Presence of the Environment | 1  | 1  |
| Livestock Grazers                        | Grasslands                        | Presence of the Environment | 0  | 1  |
| Livestock Grazers                        | Rivers and Streams                | Presence of the Environment | 2  | 0  |
| Livestock Grazers                        | Scrublands_Shrublands             | Presence of the Environment | 0  | 1  |
| Livestock Grazers                        | Terrestrial                       | Presence of the Environment | 5  | 6  |
| Livestock Grazers                        | Wetlands                          | Presence of the Environment | 1  | 1  |
| Military_Coast Guard                     | Aquatic                           | Presence of the Environment | 2  | 3  |
| Military_Coast Guard                     | Created Greenspace                | Presence of the Environment | 1  | 1  |
| Military_Coast Guard                     | Estuaries and Near Coastal Marine | Presence of the Environment | 20 | 16 |
| Military_Coast Guard                     | Lakes and Ponds                   | Presence of the Environment | 1  | 0  |
| Military_Coast Guard                     | Open Oceans and Seas              | Presence of the Environment | 1  | 0  |
| Military_Coast Guard                     | Rivers and Streams                | Presence of the Environment | 2  | 2  |
| Military_Coast Guard                     | Terrestrial                       | Presence of the Environment | 3  | 6  |
| Military_Coast Guard                     | Wetlands                          | Presence of the Environment | 3  | 4  |
| Municipal Drinking Water Plant Operators | Aquatic                           | Presence of the Environment | 8  | 8  |
| Municipal Drinking Water Plant Operators | Estuaries and Near Coastal Marine | Presence of the Environment | 4  | 4  |
| Municipal Drinking Water Plant Operators | Forests                           | Presence of the Environment | 1  | 1  |
| Municipal Drinking Water Plant Operators | Groundwater                       | Presence of the Environment | 4  | 2  |
| Municipal Drinking Water Plant Operators | Rivers and Streams                | Presence of the Environment | 1  | 1  |
| Municipal Drinking Water Plant Operators | Terrestrial                       | Presence of the Environment | 5  | 0  |
| Municipal Drinking Water Plant Operators | Wetlands                          | Presence of the Environment | 6  | 4  |
| Non-Use                                  | Wetlands                          | Presence of the Environment | 1  | 0  |
| People Who Care (Existence)              | Agroecosystems                    | Presence of the Environment | 22 | 20 |
| People Who Care (Existence)              | Aquatic                           | Presence of the Environment | 28 | 29 |
| People Who Care (Existence)              | Atmosphere                        | Presence of the Environment | 4  | 3  |
| People Who Care (Existence)              | Barren_Rock and Sand              | Presence of the Environment | 15 | 13 |
| People Who Care (Existence)              | Created Greenspace                | Presence of the Environment | 15 | 23 |
| People Who Care (Existence)              | Estuaries and Near Coastal Marine | Presence of the Environment | 28 | 29 |
| People Who Care (Existence)              | Forests                           | Presence of the Environment | 22 | 26 |
| People Who Care (Existence)              | Grasslands                        | Presence of the Environment | 4  | 6  |
| People Who Care (Existence)              | Groundwater                       | Presence of the Environment | 5  | 1  |
| People Who Care (Existence)              | Ice and Snow                      | Presence of the Environment | 2  | 3  |
| People Who Care (Existence)              | Lakes and Ponds                   | Presence of the Environment | 15 | 14 |
| People Who Care (Existence)              | Open Oceans and Seas              | Presence of the Environment | 25 | 29 |
| People Who Care (Existence)              | Rivers and Streams                | Presence of the Environment | 27 | 25 |
| People Who Care (Existence)              | Scrublands_Shrublands             | Presence of the Environment | 6  | 11 |
| People Who Care (Existence)              | Terrestrial                       | Presence of the Environment | 27 | 29 |
| People Who Care (Existence)              | Wetlands                          | Presence of the Environment | 27 | 28 |
| People Who Care (Option_Bequest)         | Agroecosystems                    | Presence of the Environment | 7  | 6  |
| People Who Care (Option_Bequest)         | Aquatic                           | Presence of the Environment | 20 | 21 |
| People Who Care (Option_Bequest)         | Atmosphere                        | Presence of the Environment | 2  | 1  |
| People Who Care (Option_Bequest)         | Barren_Rock and Sand              | Presence of the Environment | 4  | 2  |
| People Who Care (Option_Bequest)         | Created Greenspace                | Presence of the Environment | 6  | 17 |
| People Who Care (Option_Bequest)         | Estuaries and Near Coastal Marine | Presence of the Environment | 28 | 29 |
| People Who Care (Option_Bequest)         | Forests                           | Presence of the Environment | 8  | 9  |
| People Who Care (Option_Bequest)         | Grasslands                        | Presence of the Environment | 0  | 3  |
| People Who Care (Option_Bequest)         | Groundwater                       | Presence of the Environment | 2  | 0  |
| People Who Care (Option_Bequest)         | Lakes and Ponds                   | Presence of the Environment | 3  | 4  |
| People Who Care (Option_Bequest)         | Open Oceans and Seas              | Presence of the Environment | 9  | 16 |
| People Who Care (Option_Bequest)         | Rivers and Streams                | Presence of the Environment | 18 | 14 |
| People Who Care (Option_Bequest)         | Scrublands_Shrublands             | Presence of the Environment | 1  | 5  |
| People Who Care (Option_Bequest)         | Terrestrial                       | Presence of the Environment | 26 | 29 |
| People Who Care (Option_Bequest)         | Wetlands                          | Presence of the Environment | 18 | 22 |
| Recreational                             | Agroecosystems                    | Presence of the Environment | 6  | 2  |
| Recreational                             | Aquatic                           | Presence of the Environment | 21 | 23 |
| Recreational                             | Barren_Rock and Sand              | Presence of the Environment | 9  | 13 |
| Recreational                             | Created Greenspace                | Presence of the Environment | 16 | 28 |
| Recreational                             | Estuaries and Near Coastal Marine | Presence of the Environment | 28 | 29 |
| Recreational                             | Forests                           | Presence of the Environment | 6  | 12 |
| Recreational                             | Grasslands                        | Presence of the Environment | 0  | 1  |
| Recreational                             | Groundwater                       | Presence of the Environment | 4  | 0  |
| Recreational                             | Lakes and Ponds                   | Presence of the Environment | 3  | 1  |
| Recreational                             | Open Oceans and Seas              | Presence of the Environment | 12 | 18 |
| Recreational                             | Rivers and Streams                | Presence of the Environment | 13 | 14 |
| Recreational                             | Scrublands_Shrublands             | Presence of the Environment | 3  | 6  |
| Recreational                             | Terrestrial                       | Presence of the Environment | 24 | 29 |
| Recreational                             | Wetlands                          | Presence of the Environment | 13 | 24 |
| Researchers                              | Agroecosystems                    | Presence of the Environment | 2  | 3  |
| Researchers                              | Aquatic                           | Presence of the Environment | 14 | 28 |
| Researchers                              | Barren_Rock and Sand              | Presence of the Environment | 1  | 1  |
| Researchers                              | Created Greenspace                | Presence of the Environment | 1  | 11 |
| Researchers                              | Estuaries and Near Coastal Marine | Presence of the Environment | 26 | 29 |
| Researchers                              | Forests                           | Presence of the Environment | 1  | 5  |
| Researchers                              | Grasslands                        | Presence of the Environment | 0  | 1  |
| Researchers                              | Groundwater                       | Presence of the Environment | 1  | 1  |
| Researchers                              | Lakes and Ponds                   | Presence of the Environment | 1  | 2  |

|                                                                       |                                   |                             |    |    |
|-----------------------------------------------------------------------|-----------------------------------|-----------------------------|----|----|
| Researchers                                                           | Open Oceans and Seas              | Presence of the Environment | 7  | 12 |
| Researchers                                                           | Rivers and Streams                | Presence of the Environment | 6  | 12 |
| Researchers                                                           | Scrublands_Shrublands             | Presence of the Environment | 0  | 4  |
| Researchers                                                           | Terrestrial                       | Presence of the Environment | 21 | 29 |
| Researchers                                                           | Wetlands                          | Presence of the Environment | 7  | 17 |
| Residential Property Owners                                           | Agroecosystems                    | Presence of the Environment | 15 | 11 |
| Residential Property Owners                                           | Aquatic                           | Presence of the Environment | 18 | 12 |
| Residential Property Owners                                           | Barren_Rock and Sand              | Presence of the Environment | 0  | 3  |
| Residential Property Owners                                           | Created Greenspace                | Presence of the Environment | 4  | 5  |
| Residential Property Owners                                           | Estuaries and Near Coastal Marine | Presence of the Environment | 27 | 24 |
| Residential Property Owners                                           | Forests                           | Presence of the Environment | 4  | 3  |
| Residential Property Owners                                           | Groundwater                       | Presence of the Environment | 3  | 0  |
| Residential Property Owners                                           | Open Oceans and Seas              | Presence of the Environment | 1  | 2  |
| Residential Property Owners                                           | Rivers and Streams                | Presence of the Environment | 10 | 9  |
| Residential Property Owners                                           | Scrublands_Shrublands             | Presence of the Environment | 2  | 2  |
| Residential Property Owners                                           | Terrestrial                       | Presence of the Environment | 28 | 28 |
| Residential Property Owners                                           | Wetlands                          | Presence of the Environment | 8  | 13 |
| Resource-Dependent Businesses                                         | Agroecosystems                    | Presence of the Environment | 4  | 0  |
| Resource-Dependent Businesses                                         | Aquatic                           | Presence of the Environment | 25 | 20 |
| Resource-Dependent Businesses                                         | Barren_Rock and Sand              | Presence of the Environment | 8  | 6  |
| Resource-Dependent Businesses                                         | Created Greenspace                | Presence of the Environment | 10 | 15 |
| Resource-Dependent Businesses                                         | Estuaries and Near Coastal Marine | Presence of the Environment | 27 | 29 |
| Resource-Dependent Businesses                                         | Forests                           | Presence of the Environment | 2  | 2  |
| Resource-Dependent Businesses                                         | Lakes and Ponds                   | Presence of the Environment | 1  | 2  |
| Resource-Dependent Businesses                                         | Open Oceans and Seas              | Presence of the Environment | 10 | 7  |
| Resource-Dependent Businesses                                         | Rivers and Streams                | Presence of the Environment | 8  | 6  |
| Resource-Dependent Businesses                                         | Terrestrial                       | Presence of the Environment | 25 | 28 |
| Resource-Dependent Businesses                                         | Wetlands                          | Presence of the Environment | 9  | 5  |
| Spiritual and Ceremonial Participants and Participants of Celebration | Aquatic                           | Presence of the Environment | 3  | 0  |
| Spiritual and Ceremonial Participants and Participants of Celebration | Barren_Rock and Sand              | Presence of the Environment | 1  | 4  |
| Spiritual and Ceremonial Participants and Participants of Celebration | Created Greenspace                | Presence of the Environment | 4  | 4  |
| Spiritual and Ceremonial Participants and Participants of Celebration | Estuaries and Near Coastal Marine | Presence of the Environment | 15 | 19 |
| Spiritual and Ceremonial Participants and Participants of Celebration | Lakes and Ponds                   | Presence of the Environment | 0  | 1  |
| Spiritual and Ceremonial Participants and Participants of Celebration | Open Oceans and Seas              | Presence of the Environment | 1  | 2  |
| Spiritual and Ceremonial Participants and Participants of Celebration | Rivers and Streams                | Presence of the Environment | 5  | 5  |
| Spiritual and Ceremonial Participants and Participants of Celebration | Terrestrial                       | Presence of the Environment | 4  | 6  |
| Spiritual and Ceremonial Participants and Participants of Celebration | Wetlands                          | Presence of the Environment | 1  | 3  |
| Subsistence                                                           | Aquatic                           | Presence of the Environment | 2  | 3  |
| Subsistence                                                           | Estuaries and Near Coastal Marine | Presence of the Environment | 6  | 17 |
| Subsistence                                                           | Forests                           | Presence of the Environment | 0  | 1  |
| Subsistence                                                           | Open Oceans and Seas              | Presence of the Environment | 2  | 2  |
| Subsistence                                                           | Rivers and Streams                | Presence of the Environment | 1  | 0  |
| Subsistence                                                           | Terrestrial                       | Presence of the Environment | 2  | 8  |
| Subsistence                                                           | Wetlands                          | Presence of the Environment | 0  | 1  |
| Timber and Fiber and Fur_Hide Subsisters                              | Aquatic                           | Presence of the Environment | 0  | 3  |
| Timber and Fiber and Fur_Hide Subsisters                              | Rivers and Streams                | Presence of the Environment | 0  | 2  |
| Timber and Fiber and Fur_Hide Subsisters                              | Terrestrial                       | Presence of the Environment | 0  | 4  |
| Timber and Fiber and Fur_Hide Subsisters                              | Wetlands                          | Presence of the Environment | 0  | 1  |
| Timber and Fiber and Ornamental Extractors                            | Agroecosystems                    | Presence of the Environment | 1  | 2  |
| Timber and Fiber and Ornamental Extractors                            | Aquatic                           | Presence of the Environment | 3  | 0  |
| Timber and Fiber and Ornamental Extractors                            | Created Greenspace                | Presence of the Environment | 1  | 2  |
| Timber and Fiber and Ornamental Extractors                            | Estuaries and Near Coastal Marine | Presence of the Environment | 6  | 9  |
| Timber and Fiber and Ornamental Extractors                            | Forests                           | Presence of the Environment | 2  | 5  |
| Timber and Fiber and Ornamental Extractors                            | Scrublands_Shrublands             | Presence of the Environment | 1  | 2  |
| Timber and Fiber and Ornamental Extractors                            | Terrestrial                       | Presence of the Environment | 2  | 5  |
| Timber and Fiber and Ornamental Extractors                            | Wetlands                          | Presence of the Environment | 0  | 3  |
| Transporters of Goods                                                 | Aquatic                           | Presence of the Environment | 1  | 0  |
| Transporters of Goods                                                 | Estuaries and Near Coastal Marine | Presence of the Environment | 1  | 1  |
| Transporters of Goods                                                 | Rivers and Streams                | Presence of the Environment | 1  | 1  |
| Transporters of Goods                                                 | Terrestrial                       | Presence of the Environment | 0  | 1  |
| Transporters of People                                                | Agroecosystems                    | Presence of the Environment | 0  | 2  |
| Transporters of People                                                | Aquatic                           | Presence of the Environment | 3  | 1  |
| Transporters of People                                                | Barren_Rock and Sand              | Presence of the Environment | 1  | 3  |
| Transporters of People                                                | Created Greenspace                | Presence of the Environment | 2  | 0  |
| Transporters of People                                                | Estuaries and Near Coastal Marine | Presence of the Environment | 7  | 14 |
| Transporters of People                                                | Forests                           | Presence of the Environment | 0  | 5  |
| Transporters of People                                                | Open Oceans and Seas              | Presence of the Environment | 1  | 2  |
| Transporters of People                                                | Rivers and Streams                | Presence of the Environment | 2  | 4  |
| Transporters of People                                                | Scrublands_Shrublands             | Presence of the Environment | 1  | 1  |
| Transporters of People                                                | Terrestrial                       | Presence of the Environment | 1  | 10 |
| Transporters of People                                                | Wetlands                          | Presence of the Environment | 2  | 1  |
| Waders and Swimmers and Divers                                        | Aquatic                           | Presence of the Environment | 2  | 2  |
| Waders and Swimmers and Divers                                        | Barren_Rock and Sand              | Presence of the Environment | 1  | 0  |
| Waders and Swimmers and Divers                                        | Estuaries and Near Coastal Marine | Presence of the Environment | 4  | 3  |
| Wastewater Treatment Plant Operators                                  | Aquatic                           | Presence of the Environment | 11 | 4  |
| Wastewater Treatment Plant Operators                                  | Estuaries and Near Coastal Marine | Presence of the Environment | 13 | 5  |
| Wastewater Treatment Plant Operators                                  | Forests                           | Presence of the Environment | 1  | 0  |
| Wastewater Treatment Plant Operators                                  | Groundwater                       | Presence of the Environment | 2  | 2  |



|                                          |                                   |                             |    |   |
|------------------------------------------|-----------------------------------|-----------------------------|----|---|
| Wastewater Treatment Plant Operators     | Lakes and Ponds                   | Presence of the Environment | 3  | 0 |
| Wastewater Treatment Plant Operators     | Open Oceans and Seas              | Presence of the Environment | 1  | 0 |
| Wastewater Treatment Plant Operators     | Rivers and Streams                | Presence of the Environment | 10 | 0 |
| Wastewater Treatment Plant Operators     | Terrestrial                       | Presence of the Environment | 3  | 1 |
| Wastewater Treatment Plant Operators     | Wetlands                          | Presence of the Environment | 9  | 0 |
| Water Subsisters                         | Aquatic                           | Presence of the Environment | 3  | 3 |
| Water Subsisters                         | Created Greenspace                | Presence of the Environment | 6  | 0 |
| Water Subsisters                         | Estuaries and Near Coastal Marine | Presence of the Environment | 0  | 2 |
| Water Subsisters                         | Groundwater                       | Presence of the Environment | 1  | 0 |
| Water Subsisters                         | Rivers and Streams                | Presence of the Environment | 2  | 1 |
| Water Subsisters                         | Terrestrial                       | Presence of the Environment | 2  | 5 |
| Water Subsisters                         | Wetlands                          | Presence of the Environment | 0  | 1 |
| Agricultural                             | Agroecosystems                    | Soil                        | 2  | 2 |
| Agricultural                             | Estuaries and Near Coastal Marine | Soil                        | 0  | 1 |
| Agricultural                             | Terrestrial                       | Soil                        | 1  | 2 |
| Farmers                                  | Agroecosystems                    | Soil                        | 4  | 3 |
| Farmers                                  | Aquatic                           | Soil                        | 1  | 0 |
| Farmers                                  | Forests                           | Soil                        | 0  | 1 |
| Farmers                                  | Rivers and Streams                | Soil                        | 0  | 1 |
| Farmers                                  | Terrestrial                       | Soil                        | 2  | 1 |
| Foresters                                | Terrestrial                       | Soil                        | 0  | 1 |
| Government and Municipal and Residential | Agroecosystems                    | Soil                        | 1  | 0 |
| Government and Municipal and Residential | Aquatic                           | Soil                        | 1  | 0 |
| Government and Municipal and Residential | Terrestrial                       | Soil                        | 1  | 1 |
| Industrial Dischargers                   | Aquatic                           | Soil                        | 1  | 0 |
| Industrial Dischargers                   | Wetlands                          | Soil                        | 1  | 0 |
| People Who Care (Existence)              | Aquatic                           | Soil                        | 1  | 2 |
| People Who Care (Existence)              | Open Oceans and Seas              | Soil                        | 1  | 0 |
| People Who Care (Existence)              | Rivers and Streams                | Soil                        | 0  | 1 |
| People Who Care (Existence)              | Terrestrial                       | Soil                        | 2  | 2 |
| People Who Care (Existence)              | Wetlands                          | Soil                        | 1  | 1 |
| Experiencers and Viewers                 | Aquatic                           | Sounds and Scents           | 1  | 5 |
| Experiencers and Viewers                 | Estuaries and Near Coastal Marine | Sounds and Scents           | 0  | 3 |
| Experiencers and Viewers                 | Terrestrial                       | Sounds and Scents           | 0  | 2 |
| Farmers                                  | Agroecosystems                    | Sounds and Scents           | 1  | 0 |
| Government and Municipal and Residential | Agroecosystems                    | Sounds and Scents           | 1  | 0 |
| Government and Municipal and Residential | Aquatic                           | Sounds and Scents           | 2  | 0 |
| Government and Municipal and Residential | Estuaries and Near Coastal Marine | Sounds and Scents           | 1  | 0 |
| Commercial_Military Transportation       | Barren_Rock and Sand              | Substrate                   | 0  | 1 |
| Educators and Students                   | Aquatic                           | Substrate                   | 0  | 2 |
| Educators and Students                   | Estuaries and Near Coastal Marine | Substrate                   | 0  | 3 |
| Educators and Students                   | Wetlands                          | Substrate                   | 0  | 2 |
| Experiencers and Viewers                 | Open Oceans and Seas              | Substrate                   | 0  | 1 |
| Experiencers and Viewers                 | Scrublands_Shrublands             | Substrate                   | 0  | 1 |
| Food Extractors                          | Aquatic                           | Substrate                   | 3  | 2 |
| Food Extractors                          | Estuaries and Near Coastal Marine | Substrate                   | 2  | 1 |
| Food Pickers and Gatherers               | Aquatic                           | Substrate                   | 0  | 1 |
| Food Pickers and Gatherers               | Estuaries and Near Coastal Marine | Substrate                   | 0  | 1 |
| Government and Municipal and Residential | Aquatic                           | Substrate                   | 1  | 1 |
| Government and Municipal and Residential | Barren_Rock and Sand              | Substrate                   | 2  | 2 |
| Government and Municipal and Residential | Estuaries and Near Coastal Marine | Substrate                   | 4  | 3 |
| Government and Municipal and Residential | Terrestrial                       | Substrate                   | 0  | 1 |
| Government and Municipal and Residential | Wetlands                          | Substrate                   | 1  | 1 |
| Learning                                 | Barren_Rock and Sand              | Substrate                   | 0  | 1 |
| Learning                                 | Estuaries and Near Coastal Marine | Substrate                   | 1  | 1 |
| Learning                                 | Wetlands                          | Substrate                   | 1  | 0 |
| People Who Care (Existence)              | Barren_Rock and Sand              | Substrate                   | 2  | 0 |
| People Who Care (Existence)              | Estuaries and Near Coastal Marine | Substrate                   | 7  | 3 |
| People Who Care (Existence)              | Open Oceans and Seas              | Substrate                   | 0  | 1 |
| People Who Care (Existence)              | Scrublands_Shrublands             | Substrate                   | 1  | 1 |
| People Who Care (Existence)              | Terrestrial                       | Substrate                   | 1  | 1 |
| People Who Care (Existence)              | Wetlands                          | Substrate                   | 1  | 0 |
| People Who Care (Option_Request)         | Estuaries and Near Coastal Marine | Substrate                   | 2  | 0 |
| People Who Care (Option_Request)         | Open Oceans and Seas              | Substrate                   | 3  | 0 |
| Agricultural Processors                  | Agroecosystems                    | Timber                      | 1  | 2 |
| Commercial_Military Transportation       | Wetlands                          | Timber                      | 0  | 1 |
| Commerical_Industrial                    | Agroecosystems                    | Timber                      | 1  | 0 |
| Commerical_Industrial                    | Forests                           | Timber                      | 3  | 4 |
| Farmers                                  | Agroecosystems                    | Timber                      | 3  | 3 |
| Foresters                                | Agroecosystems                    | Timber                      | 2  | 3 |
| Foresters                                | Forests                           | Timber                      | 1  | 8 |
| Foresters                                | Wetlands                          | Timber                      | 0  | 1 |
| Government and Municipal and Residential | Agroecosystems                    | Timber                      | 1  | 2 |
| Government and Municipal and Residential | Forests                           | Timber                      | 1  | 5 |
| Government and Municipal and Residential | Scrublands_Shrublands             | Timber                      | 0  | 3 |
| Industrial Processors                    | Forests                           | Timber                      | 5  | 2 |
| Industrial Processors                    | Wetlands                          | Timber                      | 1  | 0 |
| Military_Coast Guard                     | Forests                           | Timber                      | 0  | 1 |

|                                                                       |                                   |            |    |    |
|-----------------------------------------------------------------------|-----------------------------------|------------|----|----|
| People Who Care (Existence)                                           | Forests                           | Timber     | 1  | 5  |
| People Who Care (Option_Request)                                      | Forests                           | Timber     | 0  | 4  |
| Residential Property Owners                                           | Forests                           | Timber     | 1  | 0  |
| Residential Property Owners                                           | Terrestrial                       | Timber     | 1  | 1  |
| Resource-Dependent Businesses                                         | Agroecosystems                    | Timber     | 2  | 0  |
| Resource-Dependent Businesses                                         | Forests                           | Timber     | 1  | 0  |
| Timber and Fiber and Ornamental Extractors                            | Agroecosystems                    | Timber     | 2  | 6  |
| Timber and Fiber and Ornamental Extractors                            | Aquatic                           | Timber     | 2  | 1  |
| Timber and Fiber and Ornamental Extractors                            | Estuaries and Near Coastal Marine | Timber     | 3  | 6  |
| Timber and Fiber and Ornamental Extractors                            | Forests                           | Timber     | 8  | 19 |
| Timber and Fiber and Ornamental Extractors                            | Scrublands_Shrublands             | Timber     | 1  | 0  |
| Timber and Fiber and Ornamental Extractors                            | Terrestrial                       | Timber     | 6  | 13 |
| Timber and Fiber and Ornamental Extractors                            | Wetlands                          | Timber     | 1  | 4  |
| Transporters of Goods                                                 | Forests                           | Timber     | 2  | 0  |
| Agricultural                                                          | Agroecosystems                    | Viewscapes | 4  | 1  |
| All Humans                                                            | Created Greenspace                | Viewscapes | 0  | 1  |
| Boaters                                                               | Aquatic                           | Viewscapes | 1  | 0  |
| Boaters                                                               | Estuaries and Near Coastal Marine | Viewscapes | 3  | 6  |
| Commercial_Military Transportation                                    | Barren_Rock and Sand              | Viewscapes | 0  | 1  |
| Commercial_Military Transportation                                    | Estuaries and Near Coastal Marine | Viewscapes | 0  | 1  |
| Commercial_Military Transportation                                    | Rivers and Streams                | Viewscapes | 0  | 1  |
| Experiencers and Viewers                                              | Agroecosystems                    | Viewscapes | 3  | 2  |
| Experiencers and Viewers                                              | Aquatic                           | Viewscapes | 10 | 10 |
| Experiencers and Viewers                                              | Atmosphere                        | Viewscapes | 6  | 2  |
| Experiencers and Viewers                                              | Barren_Rock and Sand              | Viewscapes | 3  | 6  |
| Experiencers and Viewers                                              | Created Greenspace                | Viewscapes | 10 | 19 |
| Experiencers and Viewers                                              | Estuaries and Near Coastal Marine | Viewscapes | 22 | 24 |
| Experiencers and Viewers                                              | Forests                           | Viewscapes | 2  | 4  |
| Experiencers and Viewers                                              | Lakes and Ponds                   | Viewscapes | 0  | 3  |
| Experiencers and Viewers                                              | Open Oceans and Seas              | Viewscapes | 4  | 4  |
| Experiencers and Viewers                                              | Rivers and Streams                | Viewscapes | 9  | 12 |
| Experiencers and Viewers                                              | Scrublands_Shrublands             | Viewscapes | 1  | 1  |
| Experiencers and Viewers                                              | Terrestrial                       | Viewscapes | 15 | 21 |
| Experiencers and Viewers                                              | Wetlands                          | Viewscapes | 7  | 12 |
| Farmers                                                               | Agroecosystems                    | Viewscapes | 2  | 0  |
| Government and Municipal and Residential                              | Agroecosystems                    | Viewscapes | 1  | 0  |
| Government and Municipal and Residential                              | Aquatic                           | Viewscapes | 2  | 0  |
| Government and Municipal and Residential                              | Barren_Rock and Sand              | Viewscapes | 0  | 1  |
| Government and Municipal and Residential                              | Created Greenspace                | Viewscapes | 0  | 2  |
| Government and Municipal and Residential                              | Estuaries and Near Coastal Marine | Viewscapes | 5  | 3  |
| Government and Municipal and Residential                              | Forests                           | Viewscapes | 1  | 2  |
| Government and Municipal and Residential                              | Lakes and Ponds                   | Viewscapes | 1  | 0  |
| Government and Municipal and Residential                              | Open Oceans and Seas              | Viewscapes | 0  | 1  |
| Government and Municipal and Residential                              | Rivers and Streams                | Viewscapes | 2  | 1  |
| Government and Municipal and Residential                              | Terrestrial                       | Viewscapes | 5  | 2  |
| Government and Municipal and Residential                              | Wetlands                          | Viewscapes | 1  | 1  |
| Inspirational                                                         | Agroecosystems                    | Viewscapes | 0  | 1  |
| Inspirational                                                         | Aquatic                           | Viewscapes | 2  | 0  |
| Inspirational                                                         | Barren_Rock and Sand              | Viewscapes | 0  | 1  |
| Inspirational                                                         | Created Greenspace                | Viewscapes | 1  | 2  |
| Inspirational                                                         | Estuaries and Near Coastal Marine | Viewscapes | 13 | 3  |
| Inspirational                                                         | Rivers and Streams                | Viewscapes | 2  | 0  |
| Inspirational                                                         | Terrestrial                       | Viewscapes | 8  | 1  |
| Learning                                                              | Barren_Rock and Sand              | Viewscapes | 0  | 1  |
| Learning                                                              | Created Greenspace                | Viewscapes | 0  | 4  |
| Learning                                                              | Estuaries and Near Coastal Marine | Viewscapes | 1  | 7  |
| Learning                                                              | Rivers and Streams                | Viewscapes | 0  | 1  |
| People Who Care (Existence)                                           | Aquatic                           | Viewscapes | 0  | 1  |
| People Who Care (Existence)                                           | Forests                           | Viewscapes | 0  | 1  |
| People Who Care (Existence)                                           | Rivers and Streams                | Viewscapes | 1  | 1  |
| People Who Care (Existence)                                           | Terrestrial                       | Viewscapes | 3  | 2  |
| People Who Care (Existence)                                           | Wetlands                          | Viewscapes | 0  | 1  |
| People Who Care (Option_Request)                                      | Estuaries and Near Coastal Marine | Viewscapes | 3  | 5  |
| Recreational                                                          | Aquatic                           | Viewscapes | 7  | 3  |
| Recreational                                                          | Estuaries and Near Coastal Marine | Viewscapes | 10 | 5  |
| Recreational                                                          | Forests                           | Viewscapes | 1  | 0  |
| Recreational                                                          | Rivers and Streams                | Viewscapes | 2  | 3  |
| Recreational                                                          | Scrublands_Shrublands             | Viewscapes | 0  | 1  |
| Recreational                                                          | Terrestrial                       | Viewscapes | 1  | 2  |
| Recreational                                                          | Wetlands                          | Viewscapes | 2  | 2  |
| Residential Property Owners                                           | Aquatic                           | Viewscapes | 2  | 0  |
| Residential Property Owners                                           | Rivers and Streams                | Viewscapes | 2  | 2  |
| Residential Property Owners                                           | Terrestrial                       | Viewscapes | 3  | 0  |
| Resource-Dependent Businesses                                         | Estuaries and Near Coastal Marine | Viewscapes | 1  | 1  |
| Resource-Dependent Businesses                                         | Terrestrial                       | Viewscapes | 1  | 0  |
| Spiritual and Ceremonial Participants and Participants of Celebration | Terrestrial                       | Viewscapes | 0  | 1  |
| Agricultural                                                          | Agroecosystems                    | Water      | 18 | 14 |
| Agricultural                                                          | Aquatic                           | Water      | 10 | 3  |

|                                      |                                   |       |    |    |
|--------------------------------------|-----------------------------------|-------|----|----|
| Agricultural                         | Estuaries and Near Coastal Marine | Water | 6  | 5  |
| Agricultural                         | Forests                           | Water | 1  | 0  |
| Agricultural                         | Groundwater                       | Water | 2  | 1  |
| Agricultural                         | Lakes and Ponds                   | Water | 0  | 1  |
| Agricultural                         | Rivers and Streams                | Water | 4  | 1  |
| Agricultural                         | Terrestrial                       | Water | 0  | 1  |
| Agricultural                         | Wetlands                          | Water | 1  | 2  |
| Agricultural Processors              | Aquatic                           | Water | 2  | 2  |
| All Humans                           | Aquatic                           | Water | 19 | 12 |
| All Humans                           | Barren_Rock and Sand              | Water | 2  | 1  |
| All Humans                           | Estuaries and Near Coastal Marine | Water | 6  | 1  |
| All Humans                           | Groundwater                       | Water | 2  | 1  |
| All Humans                           | Lakes and Ponds                   | Water | 0  | 1  |
| All Humans                           | Open Oceans and Seas              | Water | 1  | 0  |
| All Humans                           | Rivers and Streams                | Water | 4  | 1  |
| All Humans                           | Terrestrial                       | Water | 1  | 0  |
| All Humans                           | Wetlands                          | Water | 2  | 1  |
| Anglers                              | Aquatic                           | Water | 9  | 8  |
| Anglers                              | Estuaries and Near Coastal Marine | Water | 7  | 1  |
| Aquaculturists                       | Aquatic                           | Water | 1  | 2  |
| Aquaculturists                       | Estuaries and Near Coastal Marine | Water | 3  | 0  |
| Aquaculturists                       | Open Oceans and Seas              | Water | 6  | 2  |
| Artists                              | Aquatic                           | Water | 2  | 5  |
| Boaters                              | Aquatic                           | Water | 27 | 29 |
| Boaters                              | Barren_Rock and Sand              | Water | 7  | 6  |
| Boaters                              | Created Greenspace                | Water | 8  | 12 |
| Boaters                              | Estuaries and Near Coastal Marine | Water | 26 | 29 |
| Boaters                              | Forests                           | Water | 2  | 4  |
| Boaters                              | Lakes and Ponds                   | Water | 4  | 6  |
| Boaters                              | Open Oceans and Seas              | Water | 14 | 13 |
| Boaters                              | Rivers and Streams                | Water | 20 | 26 |
| Boaters                              | Terrestrial                       | Water | 17 | 22 |
| Boaters                              | Wetlands                          | Water | 10 | 14 |
| CAFO Operators                       | Agroecosystems                    | Water | 2  | 1  |
| CAFO Operators                       | Aquatic                           | Water | 5  | 0  |
| CAFO Operators                       | Estuaries and Near Coastal Marine | Water | 3  | 0  |
| CAFO Operators                       | Rivers and Streams                | Water | 4  | 2  |
| CAFO Operators                       | Wetlands                          | Water | 1  | 2  |
| Commercial_Military Transportation   | Agroecosystems                    | Water | 1  | 0  |
| Commercial_Military Transportation   | Aquatic                           | Water | 21 | 22 |
| Commercial_Military Transportation   | Barren_Rock and Sand              | Water | 1  | 2  |
| Commercial_Military Transportation   | Created Greenspace                | Water | 0  | 1  |
| Commercial_Military Transportation   | Estuaries and Near Coastal Marine | Water | 18 | 15 |
| Commercial_Military Transportation   | Forests                           | Water | 1  | 1  |
| Commercial_Military Transportation   | Lakes and Ponds                   | Water | 1  | 2  |
| Commercial_Military Transportation   | Open Oceans and Seas              | Water | 5  | 6  |
| Commercial_Military Transportation   | Rivers and Streams                | Water | 16 | 17 |
| Commercial_Military Transportation   | Terrestrial                       | Water | 11 | 12 |
| Commercial_Military Transportation   | Wetlands                          | Water | 6  | 4  |
| Commerical_Industrial                | Agroecosystems                    | Water | 1  | 1  |
| Commerical_Industrial                | Aquatic                           | Water | 23 | 14 |
| Commerical_Industrial                | Created Greenspace                | Water | 0  | 1  |
| Commerical_Industrial                | Estuaries and Near Coastal Marine | Water | 13 | 8  |
| Commerical_Industrial                | Groundwater                       | Water | 5  | 2  |
| Commerical_Industrial                | Lakes and Ponds                   | Water | 0  | 3  |
| Commerical_Industrial                | Open Oceans and Seas              | Water | 4  | 1  |
| Commerical_Industrial                | Rivers and Streams                | Water | 10 | 4  |
| Commerical_Industrial                | Terrestrial                       | Water | 5  | 0  |
| Commerical_Industrial                | Wetlands                          | Water | 1  | 0  |
| Educators and Students               | Aquatic                           | Water | 27 | 28 |
| Educators and Students               | Barren_Rock and Sand              | Water | 1  | 0  |
| Educators and Students               | Created Greenspace                | Water | 3  | 1  |
| Educators and Students               | Estuaries and Near Coastal Marine | Water | 12 | 15 |
| Educators and Students               | Lakes and Ponds                   | Water | 1  | 1  |
| Educators and Students               | Open Oceans and Seas              | Water | 3  | 0  |
| Educators and Students               | Rivers and Streams                | Water | 5  | 1  |
| Educators and Students               | Terrestrial                       | Water | 3  | 1  |
| Educators and Students               | Wetlands                          | Water | 2  | 2  |
| Electric and other Energy Generators | Aquatic                           | Water | 15 | 7  |
| Electric and other Energy Generators | Estuaries and Near Coastal Marine | Water | 6  | 5  |
| Electric and other Energy Generators | Groundwater                       | Water | 1  | 0  |
| Electric and other Energy Generators | Lakes and Ponds                   | Water | 3  | 4  |
| Electric and other Energy Generators | Open Oceans and Seas              | Water | 2  | 1  |
| Electric and other Energy Generators | Rivers and Streams                | Water | 6  | 2  |
| Electric and other Energy Generators | Terrestrial                       | Water | 5  | 2  |
| Experiencers and Viewers             | Aquatic                           | Water | 20 | 16 |
| Experiencers and Viewers             | Barren_Rock and Sand              | Water | 5  | 5  |
| Experiencers and Viewers             | Created Greenspace                | Water | 1  | 8  |

|                                          |                                   |       |    |    |
|------------------------------------------|-----------------------------------|-------|----|----|
| Experiencers and Viewers                 | Estuaries and Near Coastal Marine | Water | 15 | 17 |
| Experiencers and Viewers                 | Groundwater                       | Water | 1  | 0  |
| Experiencers and Viewers                 | Open Oceans and Seas              | Water | 2  | 4  |
| Experiencers and Viewers                 | Rivers and Streams                | Water | 3  | 5  |
| Experiencers and Viewers                 | Terrestrial                       | Water | 0  | 6  |
| Experiencers and Viewers                 | Wetlands                          | Water | 0  | 1  |
| Farmers                                  | Agroecosystems                    | Water | 11 | 8  |
| Farmers                                  | Aquatic                           | Water | 5  | 1  |
| Farmers                                  | Created Greenspace                | Water | 1  | 0  |
| Farmers                                  | Estuaries and Near Coastal Marine | Water | 3  | 1  |
| Farmers                                  | Groundwater                       | Water | 1  | 0  |
| Farmers                                  | Lakes and Ponds                   | Water | 1  | 0  |
| Farmers                                  | Rivers and Streams                | Water | 3  | 2  |
| Farmers                                  | Terrestrial                       | Water | 5  | 3  |
| Farmers                                  | Wetlands                          | Water | 2  | 3  |
| Food Extractors                          | Aquatic                           | Water | 8  | 1  |
| Food Extractors                          | Wetlands                          | Water | 1  | 0  |
| Food Pickers and Gatherers               | Aquatic                           | Water | 1  | 0  |
| Food Pickers and Gatherers               | Wetlands                          | Water | 1  | 0  |
| Government and Municipal and Residential | Agroecosystems                    | Water | 9  | 0  |
| Government and Municipal and Residential | Aquatic                           | Water | 28 | 29 |
| Government and Municipal and Residential | Barren_Rock and Sand              | Water | 9  | 4  |
| Government and Municipal and Residential | Created Greenspace                | Water | 12 | 9  |
| Government and Municipal and Residential | Estuaries and Near Coastal Marine | Water | 27 | 29 |
| Government and Municipal and Residential | Forests                           | Water | 7  | 3  |
| Government and Municipal and Residential | Groundwater                       | Water | 20 | 13 |
| Government and Municipal and Residential | Ice and Snow                      | Water | 1  | 0  |
| Government and Municipal and Residential | Lakes and Ponds                   | Water | 9  | 6  |
| Government and Municipal and Residential | Open Oceans and Seas              | Water | 10 | 7  |
| Government and Municipal and Residential | Rivers and Streams                | Water | 24 | 21 |
| Government and Municipal and Residential | Terrestrial                       | Water | 19 | 20 |
| Government and Municipal and Residential | Wetlands                          | Water | 13 | 13 |
| Industrial Dischargers                   | Agroecosystems                    | Water | 2  | 0  |
| Industrial Dischargers                   | Aquatic                           | Water | 21 | 11 |
| Industrial Dischargers                   | Estuaries and Near Coastal Marine | Water | 17 | 10 |
| Industrial Dischargers                   | Groundwater                       | Water | 3  | 1  |
| Industrial Dischargers                   | Lakes and Ponds                   | Water | 2  | 1  |
| Industrial Dischargers                   | Open Oceans and Seas              | Water | 3  | 1  |
| Industrial Dischargers                   | Rivers and Streams                | Water | 16 | 3  |
| Industrial Dischargers                   | Terrestrial                       | Water | 7  | 3  |
| Industrial Dischargers                   | Wetlands                          | Water | 5  | 1  |
| Industrial Processors                    | Aquatic                           | Water | 11 | 9  |
| Industrial Processors                    | Estuaries and Near Coastal Marine | Water | 5  | 4  |
| Industrial Processors                    | Forests                           | Water | 1  | 0  |
| Industrial Processors                    | Groundwater                       | Water | 3  | 2  |
| Industrial Processors                    | Open Oceans and Seas              | Water | 1  | 0  |
| Industrial Processors                    | Rivers and Streams                | Water | 7  | 0  |
| Irrigators                               | Agroecosystems                    | Water | 12 | 3  |
| Irrigators                               | Aquatic                           | Water | 17 | 8  |
| Irrigators                               | Created Greenspace                | Water | 4  | 0  |
| Irrigators                               | Estuaries and Near Coastal Marine | Water | 10 | 4  |
| Irrigators                               | Groundwater                       | Water | 7  | 0  |
| Irrigators                               | Ice and Snow                      | Water | 2  | 0  |
| Irrigators                               | Lakes and Ponds                   | Water | 3  | 3  |
| Irrigators                               | Rivers and Streams                | Water | 11 | 2  |
| Irrigators                               | Terrestrial                       | Water | 9  | 2  |
| Irrigators                               | Wetlands                          | Water | 2  | 1  |
| Learning                                 | Aquatic                           | Water | 21 | 22 |
| Learning                                 | Estuaries and Near Coastal Marine | Water | 8  | 13 |
| Learning                                 | Groundwater                       | Water | 2  | 0  |
| Learning                                 | Open Oceans and Seas              | Water | 1  | 0  |
| Learning                                 | Rivers and Streams                | Water | 4  | 2  |
| Learning                                 | Terrestrial                       | Water | 5  | 1  |
| Livestock Grazers                        | Agroecosystems                    | Water | 4  | 1  |
| Livestock Grazers                        | Aquatic                           | Water | 1  | 0  |
| Livestock Grazers                        | Created Greenspace                | Water | 1  | 0  |
| Livestock Grazers                        | Rivers and Streams                | Water | 2  | 0  |
| Livestock Grazers                        | Terrestrial                       | Water | 2  | 0  |
| Livestock Grazers                        | Wetlands                          | Water | 1  | 1  |
| Military_Coast Guard                     | Aquatic                           | Water | 7  | 4  |
| Military_Coast Guard                     | Estuaries and Near Coastal Marine | Water | 11 | 6  |
| Military_Coast Guard                     | Lakes and Ponds                   | Water | 2  | 1  |
| Military_Coast Guard                     | Open Oceans and Seas              | Water | 2  | 1  |
| Military_Coast Guard                     | Rivers and Streams                | Water | 1  | 2  |
| Military_Coast Guard                     | Wetlands                          | Water | 2  | 2  |
| Municipal Drinking Water Plant Operators | Aquatic                           | Water | 24 | 20 |
| Municipal Drinking Water Plant Operators | Barren_Rock and Sand              | Water | 1  | 1  |
| Municipal Drinking Water Plant Operators | Created Greenspace                | Water | 2  | 1  |

|                                                                       |                                   |       |    |    |
|-----------------------------------------------------------------------|-----------------------------------|-------|----|----|
| Municipal Drinking Water Plant Operators                              | Estuaries and Near Coastal Marine | Water | 16 | 9  |
| Municipal Drinking Water Plant Operators                              | Forests                           | Water | 2  | 1  |
| Municipal Drinking Water Plant Operators                              | Groundwater                       | Water | 13 | 4  |
| Municipal Drinking Water Plant Operators                              | Ice and Snow                      | Water | 1  | 0  |
| Municipal Drinking Water Plant Operators                              | Lakes and Ponds                   | Water | 3  | 2  |
| Municipal Drinking Water Plant Operators                              | Open Oceans and Seas              | Water | 3  | 2  |
| Municipal Drinking Water Plant Operators                              | Rivers and Streams                | Water | 14 | 6  |
| Municipal Drinking Water Plant Operators                              | Terrestrial                       | Water | 13 | 5  |
| Municipal Drinking Water Plant Operators                              | Wetlands                          | Water | 5  | 3  |
| People Who Care (Existence)                                           | Agroecosystems                    | Water | 11 | 3  |
| People Who Care (Existence)                                           | Aquatic                           | Water | 28 | 29 |
| People Who Care (Existence)                                           | Created Greenspace                | Water | 1  | 2  |
| People Who Care (Existence)                                           | Estuaries and Near Coastal Marine | Water | 28 | 29 |
| People Who Care (Existence)                                           | Forests                           | Water | 2  | 0  |
| People Who Care (Existence)                                           | Groundwater                       | Water | 15 | 10 |
| People Who Care (Existence)                                           | Lakes and Ponds                   | Water | 6  | 4  |
| People Who Care (Existence)                                           | Open Oceans and Seas              | Water | 11 | 1  |
| People Who Care (Existence)                                           | Rivers and Streams                | Water | 18 | 14 |
| People Who Care (Existence)                                           | Scrublands_Shrublands             | Water | 0  | 2  |
| People Who Care (Existence)                                           | Terrestrial                       | Water | 19 | 16 |
| People Who Care (Existence)                                           | Wetlands                          | Water | 14 | 19 |
| People Who Care (Option_Request)                                      | Aquatic                           | Water | 14 | 17 |
| People Who Care (Option_Request)                                      | Created Greenspace                | Water | 0  | 1  |
| People Who Care (Option_Request)                                      | Estuaries and Near Coastal Marine | Water | 16 | 12 |
| People Who Care (Option_Request)                                      | Groundwater                       | Water | 5  | 0  |
| People Who Care (Option_Request)                                      | Rivers and Streams                | Water | 3  | 2  |
| People Who Care (Option_Request)                                      | Terrestrial                       | Water | 2  | 1  |
| People Who Care (Option_Request)                                      | Wetlands                          | Water | 3  | 1  |
| Recreational                                                          | Aquatic                           | Water | 26 | 28 |
| Recreational                                                          | Barren_Rock and Sand              | Water | 1  | 0  |
| Recreational                                                          | Created Greenspace                | Water | 7  | 3  |
| Recreational                                                          | Estuaries and Near Coastal Marine | Water | 19 | 12 |
| Recreational                                                          | Forests                           | Water | 1  | 0  |
| Recreational                                                          | Groundwater                       | Water | 1  | 0  |
| Recreational                                                          | Open Oceans and Seas              | Water | 0  | 3  |
| Recreational                                                          | Rivers and Streams                | Water | 6  | 9  |
| Recreational                                                          | Terrestrial                       | Water | 3  | 3  |
| Recreational                                                          | Wetlands                          | Water | 3  | 2  |
| Researchers                                                           | Aquatic                           | Water | 7  | 16 |
| Researchers                                                           | Created Greenspace                | Water | 1  | 0  |
| Researchers                                                           | Estuaries and Near Coastal Marine | Water | 10 | 22 |
| Researchers                                                           | Open Oceans and Seas              | Water | 2  | 0  |
| Researchers                                                           | Rivers and Streams                | Water | 2  | 2  |
| Researchers                                                           | Terrestrial                       | Water | 3  | 1  |
| Residential Property Owners                                           | Agroecosystems                    | Water | 2  | 0  |
| Residential Property Owners                                           | Aquatic                           | Water | 21 | 15 |
| Residential Property Owners                                           | Created Greenspace                | Water | 1  | 3  |
| Residential Property Owners                                           | Estuaries and Near Coastal Marine | Water | 11 | 3  |
| Residential Property Owners                                           | Groundwater                       | Water | 4  | 0  |
| Residential Property Owners                                           | Rivers and Streams                | Water | 4  | 2  |
| Residential Property Owners                                           | Terrestrial                       | Water | 5  | 4  |
| Residential Property Owners                                           | Wetlands                          | Water | 1  | 1  |
| Resource-Dependent Businesses                                         | Aquatic                           | Water | 13 | 11 |
| Resource-Dependent Businesses                                         | Created Greenspace                | Water | 1  | 1  |
| Resource-Dependent Businesses                                         | Estuaries and Near Coastal Marine | Water | 14 | 5  |
| Resource-Dependent Businesses                                         | Groundwater                       | Water | 2  | 0  |
| Resource-Dependent Businesses                                         | Lakes and Ponds                   | Water | 3  | 1  |
| Resource-Dependent Businesses                                         | Rivers and Streams                | Water | 1  | 1  |
| Resource-Dependent Businesses                                         | Terrestrial                       | Water | 3  | 2  |
| Spiritual and Ceremonial Participants and Participants of Celebration | Aquatic                           | Water | 2  | 0  |
| Spiritual and Ceremonial Participants and Participants of Celebration | Estuaries and Near Coastal Marine | Water | 1  | 2  |
| Subsistence                                                           | Aquatic                           | Water | 1  | 0  |
| Subsistence                                                           | Estuaries and Near Coastal Marine | Water | 1  | 0  |
| Subsistence                                                           | Wetlands                          | Water | 0  | 1  |
| Transporters of Goods                                                 | Aquatic                           | Water | 12 | 9  |
| Transporters of Goods                                                 | Created Greenspace                | Water | 1  | 2  |
| Transporters of Goods                                                 | Estuaries and Near Coastal Marine | Water | 10 | 12 |
| Transporters of Goods                                                 | Lakes and Ponds                   | Water | 0  | 1  |
| Transporters of Goods                                                 | Open Oceans and Seas              | Water | 2  | 1  |
| Transporters of Goods                                                 | Rivers and Streams                | Water | 6  | 7  |
| Transporters of Goods                                                 | Terrestrial                       | Water | 4  | 3  |
| Transporters of Goods                                                 | Wetlands                          | Water | 1  | 1  |
| Transporters of People                                                | Aquatic                           | Water | 11 | 11 |
| Transporters of People                                                | Estuaries and Near Coastal Marine | Water | 2  | 4  |
| Transporters of People                                                | Rivers and Streams                | Water | 3  | 8  |
| Transporters of People                                                | Terrestrial                       | Water | 2  | 3  |
| Transporters of People                                                | Wetlands                          | Water | 1  | 2  |
| Waders and Swimmers and Divers                                        | Aquatic                           | Water | 22 | 23 |

|                                          |                                   |         |    |    |
|------------------------------------------|-----------------------------------|---------|----|----|
| Waders and Swimmers and Divers           | Barren_Rock and Sand              | Water   | 11 | 7  |
| Waders and Swimmers and Divers           | Created Greenspace                | Water   | 1  | 2  |
| Waders and Swimmers and Divers           | Estuaries and Near Coastal Marine | Water   | 19 | 16 |
| Waders and Swimmers and Divers           | Forests                           | Water   | 3  | 2  |
| Waders and Swimmers and Divers           | Groundwater                       | Water   | 2  | 0  |
| Waders and Swimmers and Divers           | Lakes and Ponds                   | Water   | 3  | 1  |
| Waders and Swimmers and Divers           | Open Oceans and Seas              | Water   | 7  | 5  |
| Waders and Swimmers and Divers           | Rivers and Streams                | Water   | 11 | 5  |
| Waders and Swimmers and Divers           | Terrestrial                       | Water   | 6  | 9  |
| Waders and Swimmers and Divers           | Wetlands                          | Water   | 2  | 5  |
| Wastewater Treatment Plant Operators     | Aquatic                           | Water   | 17 | 6  |
| Wastewater Treatment Plant Operators     | Estuaries and Near Coastal Marine | Water   | 7  | 3  |
| Wastewater Treatment Plant Operators     | Groundwater                       | Water   | 3  | 1  |
| Wastewater Treatment Plant Operators     | Open Oceans and Seas              | Water   | 2  | 0  |
| Wastewater Treatment Plant Operators     | Rivers and Streams                | Water   | 8  | 1  |
| Wastewater Treatment Plant Operators     | Terrestrial                       | Water   | 1  | 0  |
| Wastewater Treatment Plant Operators     | Wetlands                          | Water   | 3  | 0  |
| Water Subsisters                         | Aquatic                           | Water   | 8  | 8  |
| Water Subsisters                         | Created Greenspace                | Water   | 8  | 1  |
| Water Subsisters                         | Estuaries and Near Coastal Marine | Water   | 1  | 0  |
| Water Subsisters                         | Groundwater                       | Water   | 1  | 0  |
| Water Subsisters                         | Rivers and Streams                | Water   | 2  | 2  |
| Water Subsisters                         | Terrestrial                       | Water   | 1  | 4  |
| Water Subsisters                         | Wetlands                          | Water   | 0  | 1  |
| Agricultural                             | Estuaries and Near Coastal Marine | Weather | 0  | 1  |
| Anglers                                  | Aquatic                           | Weather | 4  | 3  |
| Anglers                                  | Ice and Snow                      | Weather | 0  | 1  |
| Boaters                                  | Aquatic                           | Weather | 3  | 2  |
| Boaters                                  | Estuaries and Near Coastal Marine | Weather | 0  | 1  |
| Experiencers and Viewers                 | Aquatic                           | Weather | 1  | 3  |
| Experiencers and Viewers                 | Estuaries and Near Coastal Marine | Weather | 3  | 5  |
| Experiencers and Viewers                 | Scrublands_Shrublands             | Weather | 0  | 2  |
| Experiencers and Viewers                 | Terrestrial                       | Weather | 1  | 1  |
| Experiencers and Viewers                 | Wetlands                          | Weather | 0  | 1  |
| Farmers                                  | Aquatic                           | Weather | 1  | 0  |
| Farmers                                  | Lakes and Ponds                   | Weather | 0  | 1  |
| Farmers                                  | Terrestrial                       | Weather | 0  | 1  |
| Government and Municipal and Residential | Aquatic                           | Weather | 0  | 2  |
| Government and Municipal and Residential | Estuaries and Near Coastal Marine | Weather | 1  | 0  |
| Government and Municipal and Residential | Rivers and Streams                | Weather | 1  | 0  |
| Government and Municipal and Residential | Terrestrial                       | Weather | 0  | 1  |
| People Who Care (Existence)              | Estuaries and Near Coastal Marine | Weather | 2  | 0  |
| People Who Care (Existence)              | Forests                           | Weather | 0  | 1  |
| People Who Care (Existence)              | Scrublands_Shrublands             | Weather | 0  | 1  |
| Recreational                             | Aquatic                           | Weather | 4  | 3  |
| Recreational                             | Estuaries and Near Coastal Marine | Weather | 3  | 4  |
| Recreational                             | Wetlands                          | Weather | 0  | 1  |
| Boaters                                  | Aquatic                           | Wind    | 5  | 6  |
| Boaters                                  | Estuaries and Near Coastal Marine | Wind    | 3  | 4  |
| Boaters                                  | Rivers and Streams                | Wind    | 1  | 0  |
| Electric and other Energy Generators     | Estuaries and Near Coastal Marine | Wind    | 1  | 2  |
| Electric and other Energy Generators     | Open Oceans and Seas              | Wind    | 1  | 0  |
| Government and Municipal and Residential | Estuaries and Near Coastal Marine | Wind    | 2  | 0  |
| Government and Municipal and Residential | Open Oceans and Seas              | Wind    | 1  | 0  |
| People Who Care (Option_Request)         | Estuaries and Near Coastal Marine | Wind    | 1  | 0  |
| Agricultural                             | Agroecosystems                    | FEGS    | 21 | 20 |
| Agricultural                             | Terrestrial                       | FEGS    | 1  | 0  |
| Agricultural Processors                  | Agroecosystems                    | FEGS    | 4  | 2  |
| Agricultural Processors                  | Aquatic                           | FEGS    | 0  | 1  |
| Agricultural Processors                  | Estuaries and Near Coastal Marine | FEGS    | 0  | 2  |
| Agricultural Processors                  | Rivers and Streams                | FEGS    | 1  | 0  |
| All Humans                               | Agroecosystems                    | FEGS    | 2  | 0  |
| All Humans                               | Aquatic                           | FEGS    | 9  | 0  |
| All Humans                               | Created Greenspace                | FEGS    | 0  | 2  |
| All Humans                               | Estuaries and Near Coastal Marine | FEGS    | 11 | 7  |
| All Humans                               | Lakes and Ponds                   | FEGS    | 0  | 1  |
| All Humans                               | Open Oceans and Seas              | FEGS    | 2  | 0  |
| All Humans                               | Rivers and Streams                | FEGS    | 4  | 1  |
| All Humans                               | Terrestrial                       | FEGS    | 2  | 0  |
| All Humans                               | Wetlands                          | FEGS    | 1  | 1  |
| Anglers                                  | Aquatic                           | FEGS    | 1  | 0  |
| Anglers                                  | Estuaries and Near Coastal Marine | FEGS    | 5  | 0  |
| Aquaculturists                           | Aquatic                           | FEGS    | 1  | 1  |
| Aquaculturists                           | Open Oceans and Seas              | FEGS    | 1  | 1  |
| Artists                                  | Rivers and Streams                | FEGS    | 1  | 0  |
| Boaters                                  | Aquatic                           | FEGS    | 1  | 2  |
| Boaters                                  | Estuaries and Near Coastal Marine | FEGS    | 5  | 1  |
| Boaters                                  | Terrestrial                       | FEGS    | 1  | 1  |

|                                          |                                   |      |    |    |
|------------------------------------------|-----------------------------------|------|----|----|
| CAFO Operators                           | Agroecosystems                    | FEGS | 1  | 0  |
| CAFO Operators                           | Estuaries and Near Coastal Marine | FEGS | 1  | 0  |
| CAFO Operators                           | Rivers and Streams                | FEGS | 1  | 0  |
| CAFO Operators                           | Terrestrial                       | FEGS | 1  | 0  |
| Commercial_Military Transportation       | Aquatic                           | FEGS | 2  | 1  |
| Commercial_Military Transportation       | Estuaries and Near Coastal Marine | FEGS | 1  | 7  |
| Commercial_Military Transportation       | Terrestrial                       | FEGS | 2  | 1  |
| Commercial_Military Transportation       | Wetlands                          | FEGS | 0  | 1  |
| Commerical_Industrial                    | Agroecosystems                    | FEGS | 4  | 0  |
| Commerical_Industrial                    | Aquatic                           | FEGS | 17 | 7  |
| Commerical_Industrial                    | Barren_Rock and Sand              | FEGS | 0  | 1  |
| Commerical_Industrial                    | Created Greenspace                | FEGS | 0  | 1  |
| Commerical_Industrial                    | Estuaries and Near Coastal Marine | FEGS | 17 | 12 |
| Commerical_Industrial                    | Forests                           | FEGS | 0  | 1  |
| Commerical_Industrial                    | Lakes and Ponds                   | FEGS | 0  | 1  |
| Commerical_Industrial                    | Open Oceans and Seas              | FEGS | 1  | 4  |
| Commerical_Industrial                    | Rivers and Streams                | FEGS | 1  | 0  |
| Commerical_Industrial                    | Terrestrial                       | FEGS | 3  | 2  |
| Commerical_Industrial                    | Wetlands                          | FEGS | 1  | 3  |
| Educators and Students                   | Agroecosystems                    | FEGS | 0  | 2  |
| Educators and Students                   | Aquatic                           | FEGS | 4  | 7  |
| Educators and Students                   | Barren_Rock and Sand              | FEGS | 1  | 0  |
| Educators and Students                   | Created Greenspace                | FEGS | 1  | 1  |
| Educators and Students                   | Estuaries and Near Coastal Marine | FEGS | 27 | 29 |
| Educators and Students                   | Forests                           | FEGS | 0  | 2  |
| Educators and Students                   | Open Oceans and Seas              | FEGS | 5  | 5  |
| Educators and Students                   | Rivers and Streams                | FEGS | 1  | 2  |
| Educators and Students                   | Terrestrial                       | FEGS | 1  | 9  |
| Educators and Students                   | Wetlands                          | FEGS | 0  | 4  |
| Electric and other Energy Generators     | Aquatic                           | FEGS | 1  | 2  |
| Electric and other Energy Generators     | Estuaries and Near Coastal Marine | FEGS | 3  | 2  |
| Electric and other Energy Generators     | Lakes and Ponds                   | FEGS | 0  | 1  |
| Electric and other Energy Generators     | Wetlands                          | FEGS | 0  | 1  |
| Experiencers and Viewers                 | Aquatic                           | FEGS | 4  | 5  |
| Experiencers and Viewers                 | Barren_Rock and Sand              | FEGS | 0  | 1  |
| Experiencers and Viewers                 | Created Greenspace                | FEGS | 0  | 8  |
| Experiencers and Viewers                 | Estuaries and Near Coastal Marine | FEGS | 15 | 12 |
| Experiencers and Viewers                 | Forests                           | FEGS | 1  | 0  |
| Experiencers and Viewers                 | Open Oceans and Seas              | FEGS | 1  | 1  |
| Experiencers and Viewers                 | Rivers and Streams                | FEGS | 0  | 1  |
| Experiencers and Viewers                 | Terrestrial                       | FEGS | 2  | 3  |
| Experiencers and Viewers                 | Wetlands                          | FEGS | 1  | 1  |
| Farmers                                  | Agroecosystems                    | FEGS | 11 | 7  |
| Farmers                                  | Terrestrial                       | FEGS | 2  | 0  |
| Farmers                                  | Wetlands                          | FEGS | 1  | 0  |
| Food Extractors                          | Aquatic                           | FEGS | 9  | 6  |
| Food Extractors                          | Estuaries and Near Coastal Marine | FEGS | 9  | 5  |
| Food Extractors                          | Wetlands                          | FEGS | 1  | 0  |
| Food Pickers and Gatherers               | Aquatic                           | FEGS | 0  | 1  |
| Food Pickers and Gatherers               | Estuaries and Near Coastal Marine | FEGS | 1  | 1  |
| Food Pickers and Gatherers               | Open Oceans and Seas              | FEGS | 2  | 0  |
| Food Pickers and Gatherers               | Rivers and Streams                | FEGS | 0  | 1  |
| Food Pickers and Gatherers               | Terrestrial                       | FEGS | 1  | 2  |
| Food Subsisters                          | Aquatic                           | FEGS | 1  | 1  |
| Food Subsisters                          | Wetlands                          | FEGS | 0  | 1  |
| Foresters                                | Agroecosystems                    | FEGS | 0  | 3  |
| Foresters                                | Forests                           | FEGS | 3  | 9  |
| Fur_Hide Trappers and Hunters            | Estuaries and Near Coastal Marine | FEGS | 0  | 2  |
| Fur_Hide Trappers and Hunters            | Terrestrial                       | FEGS | 0  | 2  |
| Government and Municipal and Residential | Agroecosystems                    | FEGS | 8  | 4  |
| Government and Municipal and Residential | Aquatic                           | FEGS | 28 | 29 |
| Government and Municipal and Residential | Barren_Rock and Sand              | FEGS | 4  | 5  |
| Government and Municipal and Residential | Created Greenspace                | FEGS | 11 | 12 |
| Government and Municipal and Residential | Estuaries and Near Coastal Marine | FEGS | 28 | 29 |
| Government and Municipal and Residential | Forests                           | FEGS | 4  | 4  |
| Government and Municipal and Residential | Ice and Snow                      | FEGS | 0  | 1  |
| Government and Municipal and Residential | Lakes and Ponds                   | FEGS | 2  | 1  |
| Government and Municipal and Residential | Open Oceans and Seas              | FEGS | 16 | 15 |
| Government and Municipal and Residential | Rivers and Streams                | FEGS | 12 | 7  |
| Government and Municipal and Residential | Scrublands_Shrublands             | FEGS | 0  | 1  |
| Government and Municipal and Residential | Terrestrial                       | FEGS | 27 | 29 |
| Government and Municipal and Residential | Wetlands                          | FEGS | 10 | 12 |
| Hunters                                  | Aquatic                           | FEGS | 0  | 1  |
| Hunters                                  | Estuaries and Near Coastal Marine | FEGS | 2  | 0  |
| Industrial Dischargers                   | Open Oceans and Seas              | FEGS | 0  | 1  |
| Industrial Dischargers                   | Terrestrial                       | FEGS | 2  | 2  |
| Industrial Dischargers                   | Wetlands                          | FEGS | 0  | 1  |
| Industrial Processors                    | Agroecosystems                    | FEGS | 1  | 0  |

|                                          |                                   |      |    |    |
|------------------------------------------|-----------------------------------|------|----|----|
| Industrial Processors                    | Aquatic                           | FEGS | 2  | 1  |
| Industrial Processors                    | Estuaries and Near Coastal Marine | FEGS | 2  | 5  |
| Industrial Processors                    | Forests                           | FEGS | 0  | 1  |
| Industrial Processors                    | Lakes and Ponds                   | FEGS | 0  | 1  |
| Industrial Processors                    | Rivers and Streams                | FEGS | 2  | 0  |
| Industrial Processors                    | Terrestrial                       | FEGS | 3  | 0  |
| Inspirational                            | Aquatic                           | FEGS | 0  | 1  |
| Inspirational                            | Created Greenspace                | FEGS | 0  | 1  |
| Inspirational                            | Estuaries and Near Coastal Marine | FEGS | 6  | 7  |
| Inspirational                            | Forests                           | FEGS | 0  | 5  |
| Inspirational                            | Open Oceans and Seas              | FEGS | 2  | 1  |
| Inspirational                            | Rivers and Streams                | FEGS | 0  | 2  |
| Inspirational                            | Terrestrial                       | FEGS | 1  | 5  |
| Inspirational                            | Wetlands                          | FEGS | 0  | 2  |
| Irrigators                               | Rivers and Streams                | FEGS | 1  | 0  |
| Learning                                 | Agroecosystems                    | FEGS | 0  | 1  |
| Learning                                 | Aquatic                           | FEGS | 2  | 4  |
| Learning                                 | Barren_Rock and Sand              | FEGS | 1  | 0  |
| Learning                                 | Created Greenspace                | FEGS | 0  | 2  |
| Learning                                 | Estuaries and Near Coastal Marine | FEGS | 12 | 22 |
| Learning                                 | Forests                           | FEGS | 0  | 1  |
| Learning                                 | Groundwater                       | FEGS | 1  | 0  |
| Learning                                 | Open Oceans and Seas              | FEGS | 4  | 5  |
| Learning                                 | Rivers and Streams                | FEGS | 3  | 1  |
| Learning                                 | Terrestrial                       | FEGS | 0  | 5  |
| Learning                                 | Wetlands                          | FEGS | 1  | 2  |
| Livestock Grazers                        | Agroecosystems                    | FEGS | 2  | 2  |
| Livestock Grazers                        | Aquatic                           | FEGS | 0  | 1  |
| Livestock Grazers                        | Estuaries and Near Coastal Marine | FEGS | 2  | 0  |
| Livestock Grazers                        | Terrestrial                       | FEGS | 3  | 0  |
| Livestock Grazers                        | Wetlands                          | FEGS | 0  | 1  |
| Military_Coast Guard                     | Estuaries and Near Coastal Marine | FEGS | 3  | 2  |
| Municipal Drinking Water Plant Operators | Aquatic                           | FEGS | 3  | 5  |
| Municipal Drinking Water Plant Operators | Forests                           | FEGS | 0  | 1  |
| Municipal Drinking Water Plant Operators | Rivers and Streams                | FEGS | 1  | 0  |
| Municipal Drinking Water Plant Operators | Wetlands                          | FEGS | 1  | 0  |
| Non-Use                                  | Wetlands                          | FEGS | 1  | 0  |
| People Who Care (Existence)              | Agroecosystems                    | FEGS | 5  | 5  |
| People Who Care (Existence)              | Aquatic                           | FEGS | 28 | 29 |
| People Who Care (Existence)              | Barren_Rock and Sand              | FEGS | 1  | 1  |
| People Who Care (Existence)              | Created Greenspace                | FEGS | 15 | 13 |
| People Who Care (Existence)              | Estuaries and Near Coastal Marine | FEGS | 28 | 29 |
| People Who Care (Existence)              | Forests                           | FEGS | 8  | 14 |
| People Who Care (Existence)              | Grasslands                        | FEGS | 0  | 1  |
| People Who Care (Existence)              | Groundwater                       | FEGS | 9  | 4  |
| People Who Care (Existence)              | Lakes and Ponds                   | FEGS | 5  | 7  |
| People Who Care (Existence)              | Open Oceans and Seas              | FEGS | 16 | 22 |
| People Who Care (Existence)              | Rivers and Streams                | FEGS | 26 | 24 |
| People Who Care (Existence)              | Scrublands_Shrublands             | FEGS | 0  | 2  |
| People Who Care (Existence)              | Terrestrial                       | FEGS | 27 | 29 |
| People Who Care (Existence)              | Wetlands                          | FEGS | 27 | 28 |
| People Who Care (Option_Bequest)         | Agroecosystems                    | FEGS | 1  | 0  |
| People Who Care (Option_Bequest)         | Aquatic                           | FEGS | 16 | 15 |
| People Who Care (Option_Bequest)         | Barren_Rock and Sand              | FEGS | 1  | 1  |
| People Who Care (Option_Bequest)         | Created Greenspace                | FEGS | 1  | 4  |
| People Who Care (Option_Bequest)         | Estuaries and Near Coastal Marine | FEGS | 28 | 29 |
| People Who Care (Option_Bequest)         | Forests                           | FEGS | 2  | 8  |
| People Who Care (Option_Bequest)         | Grasslands                        | FEGS | 0  | 3  |
| People Who Care (Option_Bequest)         | Groundwater                       | FEGS | 2  | 0  |
| People Who Care (Option_Bequest)         | Lakes and Ponds                   | FEGS | 0  | 1  |
| People Who Care (Option_Bequest)         | Open Oceans and Seas              | FEGS | 4  | 4  |
| People Who Care (Option_Bequest)         | Rivers and Streams                | FEGS | 3  | 5  |
| People Who Care (Option_Bequest)         | Terrestrial                       | FEGS | 20 | 29 |
| People Who Care (Option_Bequest)         | Wetlands                          | FEGS | 4  | 10 |
| Recreational                             | Agroecosystems                    | FEGS | 4  | 3  |
| Recreational                             | Aquatic                           | FEGS | 24 | 27 |
| Recreational                             | Barren_Rock and Sand              | FEGS | 7  | 4  |
| Recreational                             | Created Greenspace                | FEGS | 12 | 10 |
| Recreational                             | Estuaries and Near Coastal Marine | FEGS | 28 | 29 |
| Recreational                             | Forests                           | FEGS | 4  | 1  |
| Recreational                             | Groundwater                       | FEGS | 2  | 0  |
| Recreational                             | Lakes and Ponds                   | FEGS | 1  | 0  |
| Recreational                             | Open Oceans and Seas              | FEGS | 13 | 18 |
| Recreational                             | Rivers and Streams                | FEGS | 11 | 7  |
| Recreational                             | Scrublands_Shrublands             | FEGS | 3  | 5  |
| Recreational                             | Terrestrial                       | FEGS | 20 | 26 |
| Recreational                             | Wetlands                          | FEGS | 12 | 20 |
| Researchers                              | Aquatic                           | FEGS | 3  | 5  |



|                                                                       |                                   |                                  |    |    |
|-----------------------------------------------------------------------|-----------------------------------|----------------------------------|----|----|
| Researchers                                                           | Created Greenspace                | FEGS                             | 0  | 1  |
| Researchers                                                           | Estuaries and Near Coastal Marine | FEGS                             | 10 | 24 |
| Researchers                                                           | Open Oceans and Seas              | FEGS                             | 2  | 1  |
| Researchers                                                           | Rivers and Streams                | FEGS                             | 0  | 1  |
| Researchers                                                           | Terrestrial                       | FEGS                             | 7  | 10 |
| Researchers                                                           | Wetlands                          | FEGS                             | 1  | 1  |
| Residential Property Owners                                           | Agroecosystems                    | FEGS                             | 3  | 4  |
| Residential Property Owners                                           | Aquatic                           | FEGS                             | 3  | 2  |
| Residential Property Owners                                           | Estuaries and Near Coastal Marine | FEGS                             | 9  | 3  |
| Residential Property Owners                                           | Open Oceans and Seas              | FEGS                             | 0  | 1  |
| Residential Property Owners                                           | Rivers and Streams                | FEGS                             | 1  | 0  |
| Residential Property Owners                                           | Terrestrial                       | FEGS                             | 14 | 18 |
| Residential Property Owners                                           | Wetlands                          | FEGS                             | 1  | 2  |
| Resource-Dependent Businesses                                         | Agroecosystems                    | FEGS                             | 2  | 1  |
| Resource-Dependent Businesses                                         | Aquatic                           | FEGS                             | 8  | 3  |
| Resource-Dependent Businesses                                         | Created Greenspace                | FEGS                             | 0  | 1  |
| Resource-Dependent Businesses                                         | Estuaries and Near Coastal Marine | FEGS                             | 14 | 7  |
| Resource-Dependent Businesses                                         | Forests                           | FEGS                             | 0  | 1  |
| Resource-Dependent Businesses                                         | Lakes and Ponds                   | FEGS                             | 0  | 1  |
| Resource-Dependent Businesses                                         | Open Oceans and Seas              | FEGS                             | 2  | 1  |
| Resource-Dependent Businesses                                         | Rivers and Streams                | FEGS                             | 1  | 0  |
| Resource-Dependent Businesses                                         | Terrestrial                       | FEGS                             | 7  | 5  |
| Resource-Dependent Businesses                                         | Wetlands                          | FEGS                             | 0  | 2  |
| Spiritual and Ceremonial Participants and Participants of Celebration | Estuaries and Near Coastal Marine | FEGS                             | 0  | 1  |
| Subsistence                                                           | Aquatic                           | FEGS                             | 1  | 2  |
| Subsistence                                                           | Estuaries and Near Coastal Marine | FEGS                             | 1  | 1  |
| Subsistence                                                           | Forests                           | FEGS                             | 0  | 1  |
| Subsistence                                                           | Open Oceans and Seas              | FEGS                             | 1  | 2  |
| Subsistence                                                           | Rivers and Streams                | FEGS                             | 1  | 1  |
| Subsistence                                                           | Terrestrial                       | FEGS                             | 0  | 1  |
| Subsistence                                                           | Wetlands                          | FEGS                             | 0  | 2  |
| Timber and Fiber and Ornamental Extractors                            | Aquatic                           | FEGS                             | 4  | 1  |
| Timber and Fiber and Ornamental Extractors                            | Estuaries and Near Coastal Marine | FEGS                             | 1  | 0  |
| Timber and Fiber and Ornamental Extractors                            | Terrestrial                       | FEGS                             | 2  | 0  |
| Transporters of Goods                                                 | Estuaries and Near Coastal Marine | FEGS                             | 0  | 1  |
| Transporters of Goods                                                 | Terrestrial                       | FEGS                             | 1  | 0  |
| Wastewater Treatment Plant Operators                                  | Aquatic                           | FEGS                             | 1  | 0  |
| Water Subsisters                                                      | Aquatic                           | FEGS                             | 1  | 1  |
| Water Subsisters                                                      | Rivers and Streams                | FEGS                             | 0  | 1  |
| People Who Care (Existence)                                           | Environment                       | Air                              | 1  | 0  |
| Experiencers and Viewers                                              | Environment                       | Atmospheric Phenomena            | 1  | 4  |
| All Humans                                                            | Environment                       | Depredators and (Pest) Predators | 1  | 0  |
| Commercial_Military Transportation                                    | Environment                       | Depredators and (Pest) Predators | 0  | 1  |
| Commercial_Industrial                                                 | Environment                       | Depredators and (Pest) Predators | 1  | 0  |
| Educators and Students                                                | Environment                       | Depredators and (Pest) Predators | 2  | 0  |
| Government and Municipal and Residential                              | Environment                       | Depredators and (Pest) Predators | 3  | 0  |
| Learning                                                              | Environment                       | Depredators and (Pest) Predators | 3  | 0  |
| People Who Care (Existence)                                           | Environment                       | Depredators and (Pest) Predators | 3  | 0  |
| Researchers                                                           | Environment                       | Depredators and (Pest) Predators | 0  | 1  |
| Residential Property Owners                                           | Environment                       | Depredators and (Pest) Predators | 2  | 0  |
| Resource-Dependent Businesses                                         | Environment                       | Depredators and (Pest) Predators | 2  | 0  |
| Agricultural Processors                                               | Environment                       | Fauna                            | 1  | 0  |
| All Humans                                                            | Environment                       | Fauna                            | 3  | 1  |
| Artists                                                               | Environment                       | Fauna                            | 0  | 3  |
| Boaters                                                               | Environment                       | Fauna                            | 3  | 5  |
| Commercial_Military Transportation                                    | Environment                       | Fauna                            | 1  | 2  |
| Commercial_Industrial                                                 | Environment                       | Fauna                            | 6  | 8  |
| Educators and Students                                                | Environment                       | Fauna                            | 13 | 25 |
| Experiencers and Viewers                                              | Environment                       | Fauna                            | 15 | 23 |
| Food Extractors                                                       | Environment                       | Fauna                            | 5  | 6  |
| Food Subsisters                                                       | Environment                       | Fauna                            | 0  | 1  |
| Fur_Hide Trappers and Hunters                                         | Environment                       | Fauna                            | 6  | 12 |
| Government and Municipal and Residential                              | Environment                       | Fauna                            | 19 | 26 |
| Hunters                                                               | Environment                       | Fauna                            | 19 | 29 |
| Inspirational                                                         | Environment                       | Fauna                            | 0  | 2  |
| Learning                                                              | Environment                       | Fauna                            | 10 | 19 |
| Military_Coast Guard                                                  | Environment                       | Fauna                            | 0  | 3  |
| People Who Care (Existence)                                           | Environment                       | Fauna                            | 27 | 28 |
| People Who Care (Option_Request)                                      | Environment                       | Fauna                            | 9  | 17 |
| Recreational                                                          | Environment                       | Fauna                            | 17 | 25 |
| Researchers                                                           | Environment                       | Fauna                            | 3  | 7  |
| Residential Property Owners                                           | Environment                       | Fauna                            | 5  | 5  |
| Resource-Dependent Businesses                                         | Environment                       | Fauna                            | 3  | 7  |
| Spiritual and Ceremonial Participants and Participants of Celebration | Environment                       | Fauna                            | 1  | 5  |
| Subsistence                                                           | Environment                       | Fauna                            | 0  | 2  |
| Timber and Fiber and Ornamental Extractors                            | Environment                       | Fauna                            | 1  | 3  |
| Farmers                                                               | Environment                       | Fiber                            | 2  | 0  |
| Government and Municipal and Residential                              | Environment                       | Fiber                            | 3  | 0  |

|                                                                       |             |                   |    |    |
|-----------------------------------------------------------------------|-------------|-------------------|----|----|
| People Who Care (Existence)                                           | Environment | Fiber             | 2  | 0  |
| All Humans                                                            | Environment | Fish              | 3  | 0  |
| Anglers                                                               | Environment | Fish              | 11 | 21 |
| Aquaculturists                                                        | Environment | Fish              | 5  | 0  |
| Boaters                                                               | Environment | Fish              | 0  | 1  |
| Educators and Students                                                | Environment | Fish              | 2  | 1  |
| Experiencers and Viewers                                              | Environment | Fish              | 2  | 1  |
| Food Extractors                                                       | Environment | Fish              | 27 | 25 |
| Food Pickers and Gatherers                                            | Environment | Fish              | 4  | 4  |
| Food Subsisters                                                       | Environment | Fish              | 4  | 4  |
| Government and Municipal and Residential                              | Environment | Fish              | 9  | 4  |
| Learning                                                              | Environment | Fish              | 4  | 0  |
| People Who Care (Existence)                                           | Environment | Fish              | 22 | 23 |
| People Who Care (Option_Request)                                      | Environment | Fish              | 4  | 0  |
| Pharmaceutical and Food Supplement Suppliers                          | Environment | Fish              | 2  | 0  |
| Recreational                                                          | Environment | Fish              | 6  | 10 |
| Researchers                                                           | Environment | Fish              | 1  | 2  |
| Spiritual and Ceremonial Participants and Participants of Celebration | Environment | Fish              | 0  | 1  |
| Timber and Fiber and Ornamental Extractors                            | Environment | Fish              | 1  | 0  |
| All Humans                                                            | Environment | Flora             | 4  | 0  |
| CAFO Operators                                                        | Environment | Flora             | 0  | 1  |
| Commercial_Military Transportation                                    | Environment | Flora             | 1  | 2  |
| Commercial_Industrial                                                 | Environment | Flora             | 3  | 5  |
| Educators and Students                                                | Environment | Flora             | 2  | 14 |
| Experiencers and Viewers                                              | Environment | Flora             | 2  | 15 |
| Food Pickers and Gatherers                                            | Environment | Flora             | 1  | 2  |
| Government and Municipal and Residential                              | Environment | Flora             | 10 | 8  |
| Industrial Processors                                                 | Environment | Flora             | 1  | 1  |
| Learning                                                              | Environment | Flora             | 3  | 4  |
| Military_Coast Guard                                                  | Environment | Flora             | 1  | 1  |
| People Who Care (Existence)                                           | Environment | Flora             | 28 | 28 |
| People Who Care (Option_Request)                                      | Environment | Flora             | 2  | 9  |
| Pharmaceutical and Food Supplement Suppliers                          | Environment | Flora             | 0  | 1  |
| Recreational                                                          | Environment | Flora             | 1  | 5  |
| Researchers                                                           | Environment | Flora             | 0  | 3  |
| Residential Property Owners                                           | Environment | Flora             | 2  | 1  |
| Resource-Dependent Businesses                                         | Environment | Flora             | 4  | 4  |
| Spiritual and Ceremonial Participants and Participants of Celebration | Environment | Flora             | 1  | 0  |
| Timber and Fiber and Ornamental Extractors                            | Environment | Flora             | 1  | 1  |
| Experiencers and Viewers                                              | Environment | Fungi             | 0  | 1  |
| Recreational                                                          | Environment | Fungi             | 0  | 1  |
| Commercial_Military Transportation                                    | Environment | Land              | 3  | 1  |
| Commercial_Industrial                                                 | Environment | Land              | 4  | 0  |
| Educators and Students                                                | Environment | Land              | 1  | 1  |
| Electric and other Energy Generators                                  | Environment | Land              | 0  | 1  |
| Farmers                                                               | Environment | Land              | 1  | 2  |
| Government and Municipal and Residential                              | Environment | Land              | 21 | 25 |
| Hunters                                                               | Environment | Land              | 0  | 1  |
| Industrial Dischargers                                                | Environment | Land              | 1  | 0  |
| Irrigators                                                            | Environment | Land              | 1  | 0  |
| Learning                                                              | Environment | Land              | 2  | 22 |
| Military_Coast Guard                                                  | Environment | Land              | 0  | 2  |
| People Who Care (Existence)                                           | Environment | Land              | 23 | 26 |
| People Who Care (Option_Request)                                      | Environment | Land              | 2  | 12 |
| Recreational                                                          | Environment | Land              | 2  | 1  |
| Residential Property Owners                                           | Environment | Land              | 5  | 5  |
| Transporters of People                                                | Environment | Land              | 3  | 0  |
| Commercial_Military Transportation                                    | Environment | Natural Materials | 1  | 0  |
| Commercial_Industrial                                                 | Environment | Natural Materials | 1  | 0  |
| Experiencers and Viewers                                              | Environment | Natural Materials | 0  | 5  |
| Government and Municipal and Residential                              | Environment | Natural Materials | 3  | 3  |
| Hunters                                                               | Environment | Natural Materials | 0  | 1  |
| Industrial Processors                                                 | Environment | Natural Materials | 13 | 8  |
| Military_Coast Guard                                                  | Environment | Natural Materials | 1  | 0  |
| People Who Care (Existence)                                           | Environment | Natural Materials | 3  | 1  |
| Timber and Fiber and Fur_Hide Subsisters                              | Environment | Natural Materials | 1  | 7  |
| Commercial_Military Transportation                                    | Environment | Open Space        | 1  | 0  |
| Commercial_Industrial                                                 | Environment | Open Space        | 1  | 1  |
| Educators and Students                                                | Environment | Open Space        | 0  | 1  |
| Experiencers and Viewers                                              | Environment | Open Space        | 0  | 1  |
| Farmers                                                               | Environment | Open Space        | 2  | 1  |
| Government and Municipal and Residential                              | Environment | Open Space        | 20 | 17 |
| Military_Coast Guard                                                  | Environment | Open Space        | 1  | 0  |
| People Who Care (Existence)                                           | Environment | Open Space        | 8  | 2  |
| People Who Care (Option_Request)                                      | Environment | Open Space        | 1  | 1  |
| Recreational                                                          | Environment | Open Space        | 3  | 2  |
| Residential Property Owners                                           | Environment | Open Space        | 2  | 1  |
| Resource-Dependent Businesses                                         | Environment | Open Space        | 1  | 1  |

|                                                                       |             |                             |    |    |
|-----------------------------------------------------------------------|-------------|-----------------------------|----|----|
| Learning                                                              | Environment | Pollinators                 | 0  | 2  |
| Agricultural                                                          | Environment | Presence of the Environment | 1  | 0  |
| Agricultural Processors                                               | Environment | Presence of the Environment | 3  | 0  |
| All Humans                                                            | Environment | Presence of the Environment | 23 | 26 |
| Anglers                                                               | Environment | Presence of the Environment | 0  | 1  |
| Aquaculturists                                                        | Environment | Presence of the Environment | 3  | 2  |
| Artists                                                               | Environment | Presence of the Environment | 6  | 11 |
| Boaters                                                               | Environment | Presence of the Environment | 15 | 13 |
| CAFO Operators                                                        | Environment | Presence of the Environment | 7  | 1  |
| Commercial_Military Transportation                                    | Environment | Presence of the Environment | 14 | 18 |
| Commercial_Industrial                                                 | Environment | Presence of the Environment | 27 | 28 |
| Educators and Students                                                | Environment | Presence of the Environment | 28 | 29 |
| Electric and other Energy Generators                                  | Environment | Presence of the Environment | 11 | 6  |
| Experiencers and Viewers                                              | Environment | Presence of the Environment | 24 | 28 |
| Farmers                                                               | Environment | Presence of the Environment | 4  | 2  |
| Food Extractors                                                       | Environment | Presence of the Environment | 1  | 3  |
| Food Pickers and Gatherers                                            | Environment | Presence of the Environment | 3  | 4  |
| Food Subsisters                                                       | Environment | Presence of the Environment | 1  | 2  |
| Foresters                                                             | Environment | Presence of the Environment | 0  | 1  |
| Government and Municipal and Residential                              | Environment | Presence of the Environment | 28 | 29 |
| Hunters                                                               | Environment | Presence of the Environment | 2  | 12 |
| Industrial Dischargers                                                | Environment | Presence of the Environment | 8  | 3  |
| Industrial Processors                                                 | Environment | Presence of the Environment | 13 | 11 |
| Inspirational                                                         | Environment | Presence of the Environment | 10 | 18 |
| Irrigators                                                            | Environment | Presence of the Environment | 1  | 3  |
| Learning                                                              | Environment | Presence of the Environment | 28 | 29 |
| Livestock Grazers                                                     | Environment | Presence of the Environment | 1  | 2  |
| Military_Coast Guard                                                  | Environment | Presence of the Environment | 7  | 6  |
| Municipal Drinking Water Plant Operators                              | Environment | Presence of the Environment | 2  | 2  |
| People Who Care (Existence)                                           | Environment | Presence of the Environment | 28 | 29 |
| People Who Care (Option_Request)                                      | Environment | Presence of the Environment | 28 | 29 |
| Recreational                                                          | Environment | Presence of the Environment | 28 | 29 |
| Researchers                                                           | Environment | Presence of the Environment | 26 | 29 |
| Residential Property Owners                                           | Environment | Presence of the Environment | 21 | 21 |
| Resource-Dependent Businesses                                         | Environment | Presence of the Environment | 28 | 29 |
| Spiritual and Ceremonial Participants and Participants of Celebration | Environment | Presence of the Environment | 8  | 16 |
| Subsistence                                                           | Environment | Presence of the Environment | 2  | 3  |
| Timber and Fiber and Fur_Hide Subsisters                              | Environment | Presence of the Environment | 0  | 1  |
| Timber and Fiber and Ornamental Extractors                            | Environment | Presence of the Environment | 2  | 2  |
| Transporters of People                                                | Environment | Presence of the Environment | 6  | 21 |
| Wastewater Treatment Plant Operators                                  | Environment | Presence of the Environment | 4  | 3  |
| Commercial_Industrial                                                 | Environment | Soil                        | 1  | 0  |
| People Who Care (Existence)                                           | Environment | Soil                        | 1  | 2  |
| All Humans                                                            | Environment | Sounds and Scents           | 1  | 0  |
| Experiencers and Viewers                                              | Environment | Sounds and Scents           | 2  | 4  |
| Recreational                                                          | Environment | Sounds and Scents           | 1  | 0  |
| Resource-Dependent Businesses                                         | Environment | Sounds and Scents           | 1  | 0  |
| Educators and Students                                                | Environment | Substrate                   | 1  | 1  |
| Food Pickers and Gatherers                                            | Environment | Substrate                   | 0  | 1  |
| Government and Municipal and Residential                              | Environment | Substrate                   | 0  | 1  |
| People Who Care (Existence)                                           | Environment | Substrate                   | 1  | 0  |
| Commercial_Military Transportation                                    | Environment | Timber                      | 0  | 1  |
| Commercial_Industrial                                                 | Environment | Timber                      | 3  | 5  |
| Foresters                                                             | Environment | Timber                      | 0  | 1  |
| Government and Municipal and Residential                              | Environment | Timber                      | 1  | 2  |
| Industrial Processors                                                 | Environment | Timber                      | 2  | 3  |
| People Who Care (Option_Request)                                      | Environment | Timber                      | 0  | 1  |
| Residential Property Owners                                           | Environment | Timber                      | 0  | 2  |
| Resource-Dependent Businesses                                         | Environment | Timber                      | 0  | 1  |
| Timber and Fiber and Ornamental Extractors                            | Environment | Timber                      | 6  | 16 |
| All Humans                                                            | Environment | Viewscapes                  | 1  | 1  |
| Artists                                                               | Environment | Viewscapes                  | 0  | 1  |
| Boaters                                                               | Environment | Viewscapes                  | 1  | 0  |
| Commercial_Military Transportation                                    | Environment | Viewscapes                  | 0  | 1  |
| Experiencers and Viewers                                              | Environment | Viewscapes                  | 26 | 27 |
| Government and Municipal and Residential                              | Environment | Viewscapes                  | 4  | 8  |
| Inspirational                                                         | Environment | Viewscapes                  | 6  | 13 |
| Learning                                                              | Environment | Viewscapes                  | 0  | 4  |
| People Who Care (Existence)                                           | Environment | Viewscapes                  | 2  | 4  |
| People Who Care (Option_Request)                                      | Environment | Viewscapes                  | 2  | 3  |
| Recreational                                                          | Environment | Viewscapes                  | 5  | 8  |
| Residential Property Owners                                           | Environment | Viewscapes                  | 2  | 1  |
| Transporters of People                                                | Environment | Viewscapes                  | 0  | 1  |
| All Humans                                                            | Environment | Water                       | 4  | 1  |
| Artists                                                               | Environment | Water                       | 1  | 1  |
| Boaters                                                               | Environment | Water                       | 18 | 27 |
| Commercial_Military Transportation                                    | Environment | Water                       | 4  | 4  |
| Commercial_Industrial                                                 | Environment | Water                       | 2  | 4  |

|                                                                       |                                   |                                  |    |    |
|-----------------------------------------------------------------------|-----------------------------------|----------------------------------|----|----|
| Educators and Students                                                | Environment                       | Water                            | 4  | 3  |
| Electric and other Energy Generators                                  | Environment                       | Water                            | 8  | 1  |
| Experiencers and Viewers                                              | Environment                       | Water                            | 3  | 4  |
| Farmers                                                               | Environment                       | Water                            | 1  | 1  |
| Government and Municipal and Residential                              | Environment                       | Water                            | 17 | 16 |
| Industrial Dischargers                                                | Environment                       | Water                            | 9  | 2  |
| Industrial Processors                                                 | Environment                       | Water                            | 1  | 1  |
| Irrigators                                                            | Environment                       | Water                            | 15 | 5  |
| Learning                                                              | Environment                       | Water                            | 5  | 2  |
| Municipal Drinking Water Plant Operators                              | Environment                       | Water                            | 5  | 4  |
| People Who Care (Existence)                                           | Environment                       | Water                            | 27 | 29 |
| People Who Care (Option_ Bequest)                                     | Environment                       | Water                            | 3  | 2  |
| Recreational                                                          | Environment                       | Water                            | 4  | 3  |
| Researchers                                                           | Environment                       | Water                            | 2  | 4  |
| Residential Property Owners                                           | Environment                       | Water                            | 5  | 4  |
| Resource-Dependent Businesses                                         | Environment                       | Water                            | 2  | 2  |
| Transporters of Goods                                                 | Environment                       | Water                            | 1  | 1  |
| Waders and Swimmers and Divers                                        | Environment                       | Water                            | 14 | 16 |
| Wastewater Treatment Plant Operators                                  | Environment                       | Water                            | 5  | 1  |
| Water Subsisters                                                      | Environment                       | Water                            | 4  | 2  |
| Educators and Students                                                | Environment                       | Weather                          | 1  | 1  |
| Experiencers and Viewers                                              | Environment                       | Weather                          | 0  | 1  |
| Government and Municipal and Residential                              | Environment                       | Weather                          | 3  | 2  |
| Hunters                                                               | Environment                       | Weather                          | 0  | 1  |
| People Who Care (Existence)                                           | Environment                       | Weather                          | 1  | 1  |
| People Who Care (Option_ Bequest)                                     | Environment                       | Weather                          | 1  | 0  |
| Recreational                                                          | Environment                       | Weather                          | 4  | 5  |
| Residential Property Owners                                           | Environment                       | Weather                          | 1  | 1  |
| Resource-Dependent Businesses                                         | Environment                       | Weather                          | 0  | 1  |
| Spiritual and Ceremonial Participants and Participants of Celebration | Environment                       | Weather                          | 0  | 1  |
| Boaters                                                               | Environment                       | Wind                             | 1  | 1  |
| Electric and other Energy Generators                                  | Environment                       | Wind                             | 2  | 3  |
| Experiencers and Viewers                                              | Environment                       | Wind                             | 2  | 3  |
| Unknown Beneficiary                                                   | Aquatic                           | Air                              | 6  | 4  |
| Unknown Beneficiary                                                   | Atmosphere                        | Air                              | 20 | 16 |
| Unknown Beneficiary                                                   | Estuaries and Near Coastal Marine | Air                              | 6  | 2  |
| Unknown Beneficiary                                                   | Forests                           | Air                              | 0  | 1  |
| Unknown Beneficiary                                                   | Terrestrial                       | Air                              | 2  | 1  |
| Unknown Beneficiary                                                   | Agroecosystems                    | Depredators and (Pest) Predators | 3  | 0  |
| Unknown Beneficiary                                                   | Aquatic                           | Depredators and (Pest) Predators | 2  | 0  |
| Unknown Beneficiary                                                   | Created Greenspace                | Depredators and (Pest) Predators | 3  | 0  |
| Unknown Beneficiary                                                   | Estuaries and Near Coastal Marine | Depredators and (Pest) Predators | 2  | 0  |
| Unknown Beneficiary                                                   | Terrestrial                       | Depredators and (Pest) Predators | 4  | 2  |
| Unknown Beneficiary                                                   | Wetlands                          | Depredators and (Pest) Predators | 0  | 1  |
| Unknown Beneficiary                                                   | Aquatic                           | Fauna                            | 20 | 24 |
| Unknown Beneficiary                                                   | Barren_Rock and Sand              | Fauna                            | 3  | 2  |
| Unknown Beneficiary                                                   | Created Greenspace                | Fauna                            | 4  | 4  |
| Unknown Beneficiary                                                   | Estuaries and Near Coastal Marine | Fauna                            | 27 | 29 |
| Unknown Beneficiary                                                   | Forests                           | Fauna                            | 5  | 10 |
| Unknown Beneficiary                                                   | Lakes and Ponds                   | Fauna                            | 2  | 2  |
| Unknown Beneficiary                                                   | Open Oceans and Seas              | Fauna                            | 7  | 10 |
| Unknown Beneficiary                                                   | Rivers and Streams                | Fauna                            | 13 | 10 |
| Unknown Beneficiary                                                   | Scrublands_Shrublands             | Fauna                            | 1  | 2  |
| Unknown Beneficiary                                                   | Terrestrial                       | Fauna                            | 18 | 21 |
| Unknown Beneficiary                                                   | Wetlands                          | Fauna                            | 13 | 19 |
| Unknown Beneficiary                                                   | Agroecosystems                    | Fiber                            | 1  | 0  |
| Unknown Beneficiary                                                   | Estuaries and Near Coastal Marine | Fiber                            | 1  | 0  |
| Unknown Beneficiary                                                   | Aquatic                           | Fish                             | 28 | 28 |
| Unknown Beneficiary                                                   | Barren_Rock and Sand              | Fish                             | 11 | 4  |
| Unknown Beneficiary                                                   | Created Greenspace                | Fish                             | 1  | 1  |
| Unknown Beneficiary                                                   | Estuaries and Near Coastal Marine | Fish                             | 28 | 26 |
| Unknown Beneficiary                                                   | Forests                           | Fish                             | 2  | 3  |
| Unknown Beneficiary                                                   | Lakes and Ponds                   | Fish                             | 5  | 4  |
| Unknown Beneficiary                                                   | Open Oceans and Seas              | Fish                             | 20 | 16 |
| Unknown Beneficiary                                                   | Rivers and Streams                | Fish                             | 19 | 12 |
| Unknown Beneficiary                                                   | Terrestrial                       | Fish                             | 15 | 11 |
| Unknown Beneficiary                                                   | Wetlands                          | Fish                             | 16 | 20 |
| Unknown Beneficiary                                                   | Aquatic                           | Flora                            | 17 | 13 |
| Unknown Beneficiary                                                   | Barren_Rock and Sand              | Flora                            | 4  | 3  |
| Unknown Beneficiary                                                   | Created Greenspace                | Flora                            | 3  | 4  |
| Unknown Beneficiary                                                   | Estuaries and Near Coastal Marine | Flora                            | 27 | 29 |
| Unknown Beneficiary                                                   | Forests                           | Flora                            | 12 | 19 |
| Unknown Beneficiary                                                   | Grasslands                        | Flora                            | 2  | 3  |
| Unknown Beneficiary                                                   | Lakes and Ponds                   | Flora                            | 2  | 3  |
| Unknown Beneficiary                                                   | Open Oceans and Seas              | Flora                            | 3  | 8  |
| Unknown Beneficiary                                                   | Rivers and Streams                | Flora                            | 13 | 6  |
| Unknown Beneficiary                                                   | Scrublands_Shrublands             | Flora                            | 4  | 10 |
| Unknown Beneficiary                                                   | Terrestrial                       | Flora                            | 24 | 27 |

|                     |                                   |                             |    |    |
|---------------------|-----------------------------------|-----------------------------|----|----|
| Unknown Beneficiary | Wetlands                          | Flora                       | 12 | 18 |
| Unknown Beneficiary | Terrestrial                       | Fungi                       | 2  | 1  |
| Unknown Beneficiary | Wetlands                          | Fungi                       | 1  | 0  |
| Unknown Beneficiary | Aquatic                           | Land                        | 17 | 17 |
| Unknown Beneficiary | Barren_Rock and Sand              | Land                        | 2  | 5  |
| Unknown Beneficiary | Created Greenspace                | Land                        | 2  | 6  |
| Unknown Beneficiary | Estuaries and Near Coastal Marine | Land                        | 28 | 27 |
| Unknown Beneficiary | Forests                           | Land                        | 8  | 13 |
| Unknown Beneficiary | Grasslands                        | Land                        | 0  | 4  |
| Unknown Beneficiary | Lakes and Ponds                   | Land                        | 5  | 3  |
| Unknown Beneficiary | Rivers and Streams                | Land                        | 20 | 14 |
| Unknown Beneficiary | Scrublands_Shrublands             | Land                        | 1  | 4  |
| Unknown Beneficiary | Terrestrial                       | Land                        | 27 | 29 |
| Unknown Beneficiary | Wetlands                          | Land                        | 20 | 25 |
| Unknown Beneficiary | Aquatic                           | Natural Materials           | 9  | 2  |
| Unknown Beneficiary | Barren_Rock and Sand              | Natural Materials           | 10 | 8  |
| Unknown Beneficiary | Estuaries and Near Coastal Marine | Natural Materials           | 12 | 5  |
| Unknown Beneficiary | Lakes and Ponds                   | Natural Materials           | 1  | 1  |
| Unknown Beneficiary | Open Oceans and Seas              | Natural Materials           | 1  | 2  |
| Unknown Beneficiary | Rivers and Streams                | Natural Materials           | 4  | 2  |
| Unknown Beneficiary | Terrestrial                       | Natural Materials           | 9  | 5  |
| Unknown Beneficiary | Wetlands                          | Natural Materials           | 5  | 2  |
| Unknown Beneficiary | Aquatic                           | Open Space                  | 1  | 0  |
| Unknown Beneficiary | Barren_Rock and Sand              | Open Space                  | 0  | 1  |
| Unknown Beneficiary | Created Greenspace                | Open Space                  | 4  | 0  |
| Unknown Beneficiary | Estuaries and Near Coastal Marine | Open Space                  | 2  | 4  |
| Unknown Beneficiary | Forests                           | Open Space                  | 0  | 1  |
| Unknown Beneficiary | Rivers and Streams                | Open Space                  | 1  | 2  |
| Unknown Beneficiary | Terrestrial                       | Open Space                  | 0  | 2  |
| Unknown Beneficiary | Wetlands                          | Open Space                  | 0  | 2  |
| Unknown Beneficiary | Agroecosystems                    | Pollinators                 | 1  | 0  |
| Unknown Beneficiary | Created Greenspace                | Pollinators                 | 1  | 3  |
| Unknown Beneficiary | Terrestrial                       | Pollinators                 | 1  | 5  |
| Unknown Beneficiary | Wetlands                          | Pollinators                 | 0  | 1  |
| Unknown Beneficiary | Agroecosystems                    | Presence of the Environment | 4  | 5  |
| Unknown Beneficiary | Aquatic                           | Presence of the Environment | 28 | 29 |
| Unknown Beneficiary | Atmosphere                        | Presence of the Environment | 6  | 10 |
| Unknown Beneficiary | Barren_Rock and Sand              | Presence of the Environment | 24 | 17 |
| Unknown Beneficiary | Created Greenspace                | Presence of the Environment | 20 | 25 |
| Unknown Beneficiary | Estuaries and Near Coastal Marine | Presence of the Environment | 28 | 29 |
| Unknown Beneficiary | Forests                           | Presence of the Environment | 23 | 29 |
| Unknown Beneficiary | Grasslands                        | Presence of the Environment | 5  | 11 |
| Unknown Beneficiary | Groundwater                       | Presence of the Environment | 21 | 18 |
| Unknown Beneficiary | Ice and Snow                      | Presence of the Environment | 6  | 3  |
| Unknown Beneficiary | Lakes and Ponds                   | Presence of the Environment | 18 | 16 |
| Unknown Beneficiary | Open Oceans and Seas              | Presence of the Environment | 27 | 29 |
| Unknown Beneficiary | Rivers and Streams                | Presence of the Environment | 28 | 29 |
| Unknown Beneficiary | Scrublands_Shrublands             | Presence of the Environment | 15 | 19 |
| Unknown Beneficiary | Terrestrial                       | Presence of the Environment | 28 | 29 |
| Unknown Beneficiary | Wetlands                          | Presence of the Environment | 28 | 29 |
| Unknown Beneficiary | Aquatic                           | Soil                        | 4  | 1  |
| Unknown Beneficiary | Estuaries and Near Coastal Marine | Soil                        | 4  | 4  |
| Unknown Beneficiary | Forests                           | Soil                        | 1  | 6  |
| Unknown Beneficiary | Open Oceans and Seas              | Soil                        | 0  | 1  |
| Unknown Beneficiary | Rivers and Streams                | Soil                        | 0  | 4  |
| Unknown Beneficiary | Scrublands_Shrublands             | Soil                        | 1  | 6  |
| Unknown Beneficiary | Terrestrial                       | Soil                        | 11 | 13 |
| Unknown Beneficiary | Tundra                            | Soil                        | 0  | 1  |
| Unknown Beneficiary | Wetlands                          | Soil                        | 1  | 5  |
| Unknown Beneficiary | Aquatic                           | Sounds and Scents           | 1  | 0  |
| Unknown Beneficiary | Barren_Rock and Sand              | Sounds and Scents           | 1  | 0  |
| Unknown Beneficiary | Aquatic                           | Substrate                   | 4  | 6  |
| Unknown Beneficiary | Barren_Rock and Sand              | Substrate                   | 12 | 12 |
| Unknown Beneficiary | Estuaries and Near Coastal Marine | Substrate                   | 19 | 15 |
| Unknown Beneficiary | Forests                           | Substrate                   | 0  | 3  |
| Unknown Beneficiary | Lakes and Ponds                   | Substrate                   | 1  | 3  |
| Unknown Beneficiary | Open Oceans and Seas              | Substrate                   | 0  | 10 |
| Unknown Beneficiary | Rivers and Streams                | Substrate                   | 1  | 4  |
| Unknown Beneficiary | Scrublands_Shrublands             | Substrate                   | 1  | 4  |
| Unknown Beneficiary | Terrestrial                       | Substrate                   | 4  | 5  |
| Unknown Beneficiary | Wetlands                          | Substrate                   | 5  | 7  |
| Unknown Beneficiary | Forests                           | Timber                      | 4  | 6  |
| Unknown Beneficiary | Terrestrial                       | Timber                      | 0  | 4  |
| Unknown Beneficiary | Agroecosystems                    | Viewscapes                  | 1  | 0  |
| Unknown Beneficiary | Aquatic                           | Viewscapes                  | 7  | 2  |
| Unknown Beneficiary | Barren_Rock and Sand              | Viewscapes                  | 1  | 2  |
| Unknown Beneficiary | Estuaries and Near Coastal Marine | Viewscapes                  | 12 | 6  |
| Unknown Beneficiary | Forests                           | Viewscapes                  | 1  | 3  |

|                                              |                                   |            |    |    |
|----------------------------------------------|-----------------------------------|------------|----|----|
| Unknown Beneficiary                          | Lakes and Ponds                   | Viewscapes | 2  | 0  |
| Unknown Beneficiary                          | Open Oceans and Seas              | Viewscapes | 1  | 1  |
| Unknown Beneficiary                          | Rivers and Streams                | Viewscapes | 2  | 5  |
| Unknown Beneficiary                          | Terrestrial                       | Viewscapes | 4  | 6  |
| Unknown Beneficiary                          | Wetlands                          | Viewscapes | 3  | 2  |
| Unknown Beneficiary                          | Agroecosystems                    | Water      | 2  | 0  |
| Unknown Beneficiary                          | Aquatic                           | Water      | 28 | 29 |
| Unknown Beneficiary                          | Barren_Rock and Sand              | Water      | 7  | 5  |
| Unknown Beneficiary                          | Created Greenspace                | Water      | 8  | 6  |
| Unknown Beneficiary                          | Estuaries and Near Coastal Marine | Water      | 28 | 29 |
| Unknown Beneficiary                          | Forests                           | Water      | 7  | 3  |
| Unknown Beneficiary                          | Groundwater                       | Water      | 13 | 9  |
| Unknown Beneficiary                          | Ice and Snow                      | Water      | 2  | 2  |
| Unknown Beneficiary                          | Lakes and Ponds                   | Water      | 14 | 6  |
| Unknown Beneficiary                          | Open Oceans and Seas              | Water      | 23 | 18 |
| Unknown Beneficiary                          | Rivers and Streams                | Water      | 27 | 26 |
| Unknown Beneficiary                          | Scrublands_Shrublands             | Water      | 2  | 0  |
| Unknown Beneficiary                          | Terrestrial                       | Water      | 24 | 26 |
| Unknown Beneficiary                          | Wetlands                          | Water      | 20 | 16 |
| Unknown Beneficiary                          | Aquatic                           | Weather    | 5  | 4  |
| Unknown Beneficiary                          | Estuaries and Near Coastal Marine | Weather    | 9  | 11 |
| Unknown Beneficiary                          | Forests                           | Weather    | 1  | 0  |
| Unknown Beneficiary                          | Ice and Snow                      | Weather    | 0  | 1  |
| Unknown Beneficiary                          | Lakes and Ponds                   | Weather    | 1  | 1  |
| Unknown Beneficiary                          | Open Oceans and Seas              | Weather    | 1  | 7  |
| Unknown Beneficiary                          | Rivers and Streams                | Weather    | 7  | 1  |
| Unknown Beneficiary                          | Scrublands_Shrublands             | Weather    | 0  | 3  |
| Unknown Beneficiary                          | Terrestrial                       | Weather    | 2  | 8  |
| Unknown Beneficiary                          | Wetlands                          | Weather    | 2  | 4  |
| Agricultural                                 | Environment                       | FEGS       | 1  | 0  |
| Agricultural Processors                      | Environment                       | FEGS       | 4  | 0  |
| All Humans                                   | Environment                       | FEGS       | 20 | 15 |
| Aquaculturists                               | Environment                       | FEGS       | 1  | 0  |
| Artists                                      | Environment                       | FEGS       | 0  | 2  |
| Boaters                                      | Environment                       | FEGS       | 2  | 1  |
| CAFO Operators                               | Environment                       | FEGS       | 6  | 1  |
| Commercial_Military Transportation           | Environment                       | FEGS       | 7  | 7  |
| Commercial_Industrial                        | Environment                       | FEGS       | 14 | 14 |
| Educators and Students                       | Environment                       | FEGS       | 19 | 29 |
| Electric and other Energy Generators         | Environment                       | FEGS       | 3  | 5  |
| Experiencers and Viewers                     | Environment                       | FEGS       | 8  | 21 |
| Food Extractors                              | Environment                       | FEGS       | 3  | 4  |
| Food Subsisters                              | Environment                       | FEGS       | 2  | 5  |
| Government and Municipal and Residential     | Environment                       | FEGS       | 27 | 29 |
| Hunters                                      | Environment                       | FEGS       | 0  | 3  |
| Industrial Dischargers                       | Environment                       | FEGS       | 1  | 0  |
| Industrial Processors                        | Environment                       | FEGS       | 3  | 1  |
| Inspirational                                | Environment                       | FEGS       | 22 | 29 |
| Irrigators                                   | Environment                       | FEGS       | 1  | 0  |
| Learning                                     | Environment                       | FEGS       | 27 | 29 |
| Livestock Grazers                            | Environment                       | FEGS       | 0  | 1  |
| Military_Coast Guard                         | Environment                       | FEGS       | 3  | 0  |
| Non-Use                                      | Environment                       | FEGS       | 1  | 0  |
| People Who Care (Existence)                  | Environment                       | FEGS       | 28 | 29 |
| People Who Care (Option_Request)             | Environment                       | FEGS       | 23 | 29 |
| Pharmaceutical and Food Supplement Suppliers | Environment                       | FEGS       | 1  | 0  |
| Recreational                                 | Environment                       | FEGS       | 21 | 29 |
| Researchers                                  | Environment                       | FEGS       | 15 | 28 |
| Residential Property Owners                  | Environment                       | FEGS       | 21 | 17 |
| Resource-Dependent Businesses                | Environment                       | FEGS       | 16 | 19 |
| Subsistence                                  | Environment                       | FEGS       | 8  | 20 |
| Transporters of Goods                        | Environment                       | FEGS       | 2  | 0  |
| Transporters of People                       | Environment                       | FEGS       | 1  | 2  |
| Unknown Beneficiary                          | Agroecosystems                    | FEGS       | 15 | 9  |
| Unknown Beneficiary                          | Aquatic                           | FEGS       | 28 | 29 |
| Unknown Beneficiary                          | Barren_Rock and Sand              | FEGS       | 10 | 5  |
| Unknown Beneficiary                          | Created Greenspace                | FEGS       | 2  | 10 |
| Unknown Beneficiary                          | Estuaries and Near Coastal Marine | FEGS       | 28 | 29 |
| Unknown Beneficiary                          | Forests                           | FEGS       | 12 | 20 |
| Unknown Beneficiary                          | Grasslands                        | FEGS       | 1  | 3  |
| Unknown Beneficiary                          | Groundwater                       | FEGS       | 8  | 3  |
| Unknown Beneficiary                          | Lakes and Ponds                   | FEGS       | 5  | 8  |
| Unknown Beneficiary                          | Open Oceans and Seas              | FEGS       | 27 | 29 |
| Unknown Beneficiary                          | Rivers and Streams                | FEGS       | 24 | 21 |
| Unknown Beneficiary                          | Scrublands_Shrublands             | FEGS       | 4  | 6  |
| Unknown Beneficiary                          | Terrestrial                       | FEGS       | 28 | 29 |
| Unknown Beneficiary                          | Wetlands                          | FEGS       | 28 | 29 |
| Unknown Beneficiary                          | Environment                       | Air        | 4  | 2  |

|                     |             |                                  |    |    |
|---------------------|-------------|----------------------------------|----|----|
| Unknown Beneficiary | Environment | Depredators and (Pest) Predators | 11 | 3  |
| Unknown Beneficiary | Environment | Fauna                            | 26 | 29 |
| Unknown Beneficiary | Environment | Fiber                            | 1  | 1  |
| Unknown Beneficiary | Environment | Fish                             | 26 | 27 |
| Unknown Beneficiary | Environment | Flora                            | 22 | 23 |
| Unknown Beneficiary | Environment | Land                             | 27 | 28 |
| Unknown Beneficiary | Environment | Natural Materials                | 14 | 5  |
| Unknown Beneficiary | Environment | Open Space                       | 3  | 1  |
| Unknown Beneficiary | Environment | Presence of the Environment      | 28 | 29 |
| Unknown Beneficiary | Environment | Soil                             | 3  | 4  |
| Unknown Beneficiary | Environment | Sounds and Scents                | 1  | 0  |
| Unknown Beneficiary | Environment | Substrate                        | 7  | 7  |
| Unknown Beneficiary | Environment | Timber                           | 1  | 1  |
| Unknown Beneficiary | Environment | Viewscales                       | 7  | 11 |
| Unknown Beneficiary | Environment | Water                            | 27 | 29 |
| Unknown Beneficiary | Environment | Weather                          | 7  | 15 |
| Unknown Beneficiary | Environment | FEES                             | 28 | 29 |
