# Supplementary material for: Who Benefits from National Estuaries? Applying the FEGS Classification System to Identify Ecosystem Services and their Beneficiaries
Source: MDPI journal article supplement (doi:10.3390/ijerph16132351), 2019-07-03
Supplement: s1 [file s1]

**AppendixA\_Synonym List.xlsx**

This excel file contains the keywords used to flag sentences in documents.

|           |                                                                                                                                                                                                                                                                                                                                                                                                                                                         |
|-----------|---------------------------------------------------------------------------------------------------------------------------------------------------------------------------------------------------------------------------------------------------------------------------------------------------------------------------------------------------------------------------------------------------------------------------------------------------------|
| Category  | This is the Classification category from the FEGS Classification System                                                                                                                                                                                                                                                                                                                                                                                 |
| Class     | This is the Class from the FEGS Classification System                                                                                                                                                                                                                                                                                                                                                                                                   |
| SubClass  | <p>This is the Subclass from the FEGS Classification System</p> <p>Each subclass has associated keywords that are searched for, depending on the type of word. "Include" are words that must be included in a sentence for it to be flagged. "Near" words must also be included in the sentence and modify the 'include' words in some way. "Exclude" words cause the flagged</p>                                                                       |
| Word_type | <p>sentence to be rejected.</p> <p>These are sets of keywords that are searched (depending on the word type) to flag sentences in the document search. The symbol " " indicates "OR". Within a column for a given subclass, particular "near", "include" and "exclude" words are considered in combination. Different columns (S1, S2, etc.) may represent other keyword combinations that are also considered (i.e., the sentence is flagged if it</p> |
| S1-S15    | <p>contains the keywords in column S1 or S2 or S3, etc.)</p>                                                                                                                                                                                                                                                                                                                                                                                            |

| Category    | Class              | SubClass             | Word_type | S1                                                                                                                                                                                                                                                                                                                                                                                                                                                                         |
|-------------|--------------------|----------------------|-----------|----------------------------------------------------------------------------------------------------------------------------------------------------------------------------------------------------------------------------------------------------------------------------------------------------------------------------------------------------------------------------------------------------------------------------------------------------------------------------|
| Beneficiary | Beneficiary        | Unknown Beneficiary  | include   | resource mitigat economic use economic opportunity economic opportunities bounty bountiful benefit social value economic value valuable ecosystem environment natur estuar renewable bay ecological field aquatic marine water park coast shore land wetland the reserve floodplain biological basin region  area watershed                                                                                                                                                |
| Beneficiary | Beneficiary        | Unknown Beneficiary  | near      |                                                                                                                                                                                                                                                                                                                                                                                                                                                                            |
| Beneficiary | Beneficiary        | Unknown Beneficiary  | exclude   | Department sewer service office division commission bay scallop lander landing landmark southland parking parker economical protection agency environmentally temperature value biomass value the regional provid.* no clue provid.* notice provid.* basis provid.*expertise valuable tool                                                                                                                                                                                 |
| Beneficiary | Agricultural       | Agricultural         | include   | Agricultur                                                                                                                                                                                                                                                                                                                                                                                                                                                                 |
| Beneficiary | Agricultural       | Agricultural         | exclude   | department.*agricultur                                                                                                                                                                                                                                                                                                                                                                                                                                                     |
| Beneficiary | Agricultural       | Irrigators           | include   | irrigat watering                                                                                                                                                                                                                                                                                                                                                                                                                                                           |
| Beneficiary | Agricultural       | CAFO Operators       | include   | CAFO livestock.*production animal production animal.*feed.*operation animal.*feed.*lot feed.*lot.*animal feed.*operation.*animal confined.*animal.*production confined.*animal.*operation                                                                                                                                                                                                                                                                                  |
| Beneficiary | Agricultural       | CAFO Operators       | near      |                                                                                                                                                                                                                                                                                                                                                                                                                                                                            |
| Beneficiary | Agricultural       | CAFO Operators       | exclude   | reproduction                                                                                                                                                                                                                                                                                                                                                                                                                                                               |
| Beneficiary | Agricultural       | Livestock Grazers    | include   | ranch grazing cattle.*range graze movement                                                                                                                                                                                                                                                                                                                                                                                                                                 |
| Beneficiary | Agricultural       | Livestock Grazers    | near      | livestock cattle hog poultry cows pig sheep goat duck                                                                                                                                                                                                                                                                                                                                                                                                                      |
| Beneficiary | Agricultural       | Livestock Grazers    | exclude   | branch actions escuela fennessey rush.*ranch quahog pigment pigeon pathogen hog hammock sheepshead                                                                                                                                                                                                                                                                                                                                                                         |
| Beneficiary | Agricultural       | Agricultural Process | include   | processor processing production products                                                                                                                                                                                                                                                                                                                                                                                                                                   |
| Beneficiary | Agricultural       | Agricultural Process | near      | agricultur agro farm food grain meat sugar grain vegetable fruit                                                                                                                                                                                                                                                                                                                                                                                                           |
| Beneficiary | Agricultural       | Agricultural Process | exclude   | seafood oyster shellfish fish in the process                                                                                                                                                                                                                                                                                                                                                                                                                               |
| Beneficiary | Agricultural       | Aquaculturists       | include   | aquacultur aquafarm shellfish garden oyster garden shellfish farm oyster farm fish farm aqua-farm aquatic farm                                                                                                                                                                                                                                                                                                                                                             |
| Beneficiary | Agricultural       | Aquaculturists       | near      |                                                                                                                                                                                                                                                                                                                                                                                                                                                                            |
| Beneficiary | Agricultural       | Aquaculturists       | exclude   |                                                                                                                                                                                                                                                                                                                                                                                                                                                                            |
| Beneficiary | Agricultural       | Farmers              | include   | crops orchard farm cropland vineyard crop nutrient                                                                                                                                                                                                                                                                                                                                                                                                                         |
| Beneficiary | Agricultural       | Farmers              | near      |                                                                                                                                                                                                                                                                                                                                                                                                                                                                            |
| Beneficiary | Agricultural       | Farmers              | exclude   | farm shellfish farm fish farm oyster farm clam farm mussel farm shrimp farm shellfish farmed fish farmed oyster farmed clam farmed mussel farmed shrimp farming shellfish farming fish farming oyster farming clam farming mussel farming shrimp shellfish farm fish farm oyster farm clam farm mussel farm shrimp farm aqua farm farm market farmer.* market management.*plan service.*agency nracs aqua farm aquatic farm farm bill macrops orchard grass orchard oriole |
| Beneficiary | Agricultural       | Foresters            | include   | forester forestry tree.*farm silviculture                                                                                                                                                                                                                                                                                                                                                                                                                                  |
| Beneficiary | Agricultural       | Foresters            | near      |                                                                                                                                                                                                                                                                                                                                                                                                                                                                            |
| Beneficiary | Agricultural       | Foresters            | exclude   | braintree Division of Parks & Forestry Forestry Service Forestry Association Forestry Division Division of Department of Forestry Agency Forestry Assistance Forestry council Society of                                                                                                                                                                                                                                                                                   |
| Beneficiary | Commerical_Industr | Commerical_Industr   | include   | commercial industry industrial business                                                                                                                                                                                                                                                                                                                                                                                                                                    |

| Category    | Class              | SubClass             | Word_type | S2                                                                                                                                                                                                                                                                                                                                                                                                                                                                                                                                                                                              | S3                                                                                                                                                                                                                                                                                                                                                                                                                                                                                                                        |
|-------------|--------------------|----------------------|-----------|-------------------------------------------------------------------------------------------------------------------------------------------------------------------------------------------------------------------------------------------------------------------------------------------------------------------------------------------------------------------------------------------------------------------------------------------------------------------------------------------------------------------------------------------------------------------------------------------------|---------------------------------------------------------------------------------------------------------------------------------------------------------------------------------------------------------------------------------------------------------------------------------------------------------------------------------------------------------------------------------------------------------------------------------------------------------------------------------------------------------------------------|
| Beneficiary | Beneficiary        | Unknown Beneficiary  | include   | beneficial use living resource natural feature natural resource ecosystem service ecological service water resource air resource ecological resource valuable resource resource value                                                                                                                                                                                                                                                                                                                                                                                                           | clean air clean water air quality water quality                                                                                                                                                                                                                                                                                                                                                                                                                                                                           |
| Beneficiary | Beneficiary        | Unknown Beneficiary  | near      |                                                                                                                                                                                                                                                                                                                                                                                                                                                                                                                                                                                                 |                                                                                                                                                                                                                                                                                                                                                                                                                                                                                                                           |
| Beneficiary | Beneficiary        | Unknown Beneficiary  | exclude   | department                                                                                                                                                                                                                                                                                                                                                                                                                                                                                                                                                                                      | recreational water quality drinking water quality clean water act clean air act                                                                                                                                                                                                                                                                                                                                                                                                                                           |
| Beneficiary | Agricultural       | Agricultural         | include   |                                                                                                                                                                                                                                                                                                                                                                                                                                                                                                                                                                                                 |                                                                                                                                                                                                                                                                                                                                                                                                                                                                                                                           |
| Beneficiary | Agricultural       | Agricultural         | exclude   |                                                                                                                                                                                                                                                                                                                                                                                                                                                                                                                                                                                                 |                                                                                                                                                                                                                                                                                                                                                                                                                                                                                                                           |
| Beneficiary | Agricultural       | Irrigators           | include   |                                                                                                                                                                                                                                                                                                                                                                                                                                                                                                                                                                                                 |                                                                                                                                                                                                                                                                                                                                                                                                                                                                                                                           |
| Beneficiary | Agricultural       | CAFO Operators       | include   | feed.*operation feed.*lot confined production                                                                                                                                                                                                                                                                                                                                                                                                                                                                                                                                                   | livestock                                                                                                                                                                                                                                                                                                                                                                                                                                                                                                                 |
| Beneficiary | Agricultural       | CAFO Operators       | near      | livestock cattle hog poultry cows pig chicken sheep goat duck                                                                                                                                                                                                                                                                                                                                                                                                                                                                                                                                   | manage                                                                                                                                                                                                                                                                                                                                                                                                                                                                                                                    |
| Beneficiary | Agricultural       | CAFO Operators       | exclude   | migrat wildlife quahog pigment pigeon pathogen reproduction hog hammock sheepshead                                                                                                                                                                                                                                                                                                                                                                                                                                                                                                              |                                                                                                                                                                                                                                                                                                                                                                                                                                                                                                                           |
| Beneficiary | Agricultural       | Livestock Grazers    | include   | pasture                                                                                                                                                                                                                                                                                                                                                                                                                                                                                                                                                                                         | ranching                                                                                                                                                                                                                                                                                                                                                                                                                                                                                                                  |
| Beneficiary | Agricultural       | Livestock Grazers    | near      |                                                                                                                                                                                                                                                                                                                                                                                                                                                                                                                                                                                                 |                                                                                                                                                                                                                                                                                                                                                                                                                                                                                                                           |
| Beneficiary | Agricultural       | Livestock Grazers    | exclude   |                                                                                                                                                                                                                                                                                                                                                                                                                                                                                                                                                                                                 | branch rush.*ranch                                                                                                                                                                                                                                                                                                                                                                                                                                                                                                        |
| Beneficiary | Agricultural       | Agricultural Process | include   | mill                                                                                                                                                                                                                                                                                                                                                                                                                                                                                                                                                                                            | commodity commodities goods                                                                                                                                                                                                                                                                                                                                                                                                                                                                                               |
| Beneficiary | Agricultural       | Agricultural Process | near      | agricult farm grain food                                                                                                                                                                                                                                                                                                                                                                                                                                                                                                                                                                        | agricult farm                                                                                                                                                                                                                                                                                                                                                                                                                                                                                                             |
| Beneficiary | Agricultural       | Agricultural Process | exclude   | million millimeter millennia milliliter millirem milligram miller mill.*creek                                                                                                                                                                                                                                                                                                                                                                                                                                                                                                                   |                                                                                                                                                                                                                                                                                                                                                                                                                                                                                                                           |
| Beneficiary | Agricultural       | Aquaculturists       | include   | hatchery hatcheries culturing grower culture cultivat garden                                                                                                                                                                                                                                                                                                                                                                                                                                                                                                                                    | hatchery hatcheries culturing grower growing culture cultivat                                                                                                                                                                                                                                                                                                                                                                                                                                                             |
| Beneficiary | Agricultural       | Aquaculturists       | near      | shellfish fish oyster clam scallop mussel shrimp aquatic.*plant meat crab salm on oyster pike crab lobster mullet mussel bass herring grouper snapper alewife flounder abalone scallop clam geoduck crawfish crayfish crustacea                                                                                                                                                                                                                                                                                                                                                                 | aqua                                                                                                                                                                                                                                                                                                                                                                                                                                                                                                                      |
| Beneficiary | Agricultural       | Aquaculturists       | exclude   | fishing fisher agricultur ambassador spike native culture cultures                                                                                                                                                                                                                                                                                                                                                                                                                                                                                                                              | fishing fisher agricultur ambassador spike native culture cultures                                                                                                                                                                                                                                                                                                                                                                                                                                                        |
| Beneficiary | Agricultural       | Farmers              | include   | plantation                                                                                                                                                                                                                                                                                                                                                                                                                                                                                                                                                                                      | bog farm harvest grower growing                                                                                                                                                                                                                                                                                                                                                                                                                                                                                           |
| Beneficiary | Agricultural       | Farmers              | near      | sugar coffee                                                                                                                                                                                                                                                                                                                                                                                                                                                                                                                                                                                    | rice vegetable cranberr                                                                                                                                                                                                                                                                                                                                                                                                                                                                                                   |
| Beneficiary | Agricultural       | Farmers              | exclude   | implantation                                                                                                                                                                                                                                                                                                                                                                                                                                                                                                                                                                                    | farm shellfish farm fish farm oyster farm clam farm mussel farm shrimp farm shellfish farmed fish farmed oyster farmed clam farmed mussel farmed shrimp farming shellfish farming fish farming oyster farming clam farming mussel farming shrimp shellfish farm fish farm oyster farm clam farm mussel farm shrimp farm aqua farm farm market farmer.*market management.*plan service.*agency nracs aquafarm aquatic farm farm bill macrops orchard grass orchard oriole bog fern bog moss bog club boge Harvest brodiaea |
| Beneficiary | Agricultural       | Foresters            | include   | plantation farm grower growing                                                                                                                                                                                                                                                                                                                                                                                                                                                                                                                                                                  | forest manage forest indust                                                                                                                                                                                                                                                                                                                                                                                                                                                                                               |
| Beneficiary | Agricultural       | Foresters            | near      | pine wood pulp tree timber oak elm lumber cedar pine oak cypress elm ash maple hickory hardwood                                                                                                                                                                                                                                                                                                                                                                                                                                                                                                 |                                                                                                                                                                                                                                                                                                                                                                                                                                                                                                                           |
| Beneficiary | Agricultural       | Foresters            | exclude   | transplant braintree implantation cash category sewage sanitary acquatic management.*area fish wash dnr mcbp trash shoreline pineda pinellas legend pine.*island pine.*barren vash elmer elm st ashe coal ash mash sash cash bash overwhelm oakdale oakley croak coal.*ash delmarva fashion pineland barrier.*island water.*pollution soak pine.*beach over.*whelmed barrier.*beach ashore sand.*pine shorebird percent metals oakland silver side hash develm hairstreak crash pine.*hills ocean.*pine oak.*harbor oak.*ridge pine.*seed woodfern sandalwoods wood satyr wood borer wood nymph |                                                                                                                                                                                                                                                                                                                                                                                                                                                                                                                           |
| Beneficiary | Commerical_Industr | Commerical_Industr   | include   | commerce                                                                                                                                                                                                                                                                                                                                                                                                                                                                                                                                                                                        |                                                                                                                                                                                                                                                                                                                                                                                                                                                                                                                           |

| Category    | Class              | SubClass             | Word_type | S4                                                                    | S5                                                                                                     |
|-------------|--------------------|----------------------|-----------|-----------------------------------------------------------------------|--------------------------------------------------------------------------------------------------------|
| Beneficiary | Beneficiary        | Unknown Beneficiary  | include   |                                                                       |                                                                                                        |
| Beneficiary | Beneficiary        | Unknown Beneficiary  | near      |                                                                       |                                                                                                        |
| Beneficiary | Beneficiary        | Unknown Beneficiary  | exclude   |                                                                       |                                                                                                        |
| Beneficiary | Agricultural       | Agricultural         | include   |                                                                       |                                                                                                        |
| Beneficiary | Agricultural       | Agricultural         | exclude   |                                                                       |                                                                                                        |
| Beneficiary | Agricultural       | Irrigators           | include   |                                                                       |                                                                                                        |
| Beneficiary | Agricultural       | CAFO Operators       | include   | feeding feedlot feed lot                                              | operator operation farm                                                                                |
| Beneficiary | Agricultural       | CAFO Operators       | near      | cattle livestock cow poultry hog pig chicken sheep goat duck          | cattle livestock cow poultry hog pig chicken sheep goat duck                                           |
| Beneficiary | Agricultural       | CAFO Operators       | exclude   | migrat wildlife quahog pigment pigeon pathogen hog hammock sheepshead | power<br>plant aquacultur marina boat watercraft quahog pigment pigeon pathogen hog hammock sheepshead |
| Beneficiary | Agricultural       | Livestock Grazers    | include   |                                                                       |                                                                                                        |
| Beneficiary | Agricultural       | Livestock Grazers    | near      |                                                                       |                                                                                                        |
| Beneficiary | Agricultural       | Livestock Grazers    | exclude   |                                                                       |                                                                                                        |
| Beneficiary | Agricultural       | Agricultural Process | include   |                                                                       |                                                                                                        |
| Beneficiary | Agricultural       | Agricultural Process | near      |                                                                       |                                                                                                        |
| Beneficiary | Agricultural       | Agricultural Process | exclude   |                                                                       |                                                                                                        |
| Beneficiary | Agricultural       | Aquaculturists       | include   |                                                                       |                                                                                                        |
| Beneficiary | Agricultural       | Aquaculturists       | near      |                                                                       |                                                                                                        |
| Beneficiary | Agricultural       | Aquaculturists       | exclude   |                                                                       |                                                                                                        |
| Beneficiary | Agricultural       | Farmers              | include   |                                                                       |                                                                                                        |
| Beneficiary | Agricultural       | Farmers              | near      |                                                                       |                                                                                                        |
| Beneficiary | Agricultural       | Farmers              | exclude   |                                                                       |                                                                                                        |
| Beneficiary | Agricultural       | Foresters            | include   |                                                                       |                                                                                                        |
| Beneficiary | Agricultural       | Foresters            | near      |                                                                       |                                                                                                        |
| Beneficiary | Agricultural       | Foresters            | exclude   |                                                                       |                                                                                                        |
| Beneficiary | Commerical_Industr | Commerical_Industr   | include   |                                                                       |                                                                                                        |

| Category    | Class              | SubClass             | Word_type | S6 | S7 |
|-------------|--------------------|----------------------|-----------|----|----|
| Beneficiary | Beneficiary        | Unknown Beneficiary  | include   |    |    |
| Beneficiary | Beneficiary        | Unknown Beneficiary  | near      |    |    |
| Beneficiary | Beneficiary        | Unknown Beneficiary  | exclude   |    |    |
| Beneficiary | Agricultural       | Agricultural         | include   |    |    |
| Beneficiary | Agricultural       | Agricultural         | exclude   |    |    |
| Beneficiary | Agricultural       | Irrigators           | include   |    |    |
| Beneficiary | Agricultural       | CAFO Operators       | include   |    |    |
| Beneficiary | Agricultural       | CAFO Operators       | near      |    |    |
| Beneficiary | Agricultural       | CAFO Operators       | exclude   |    |    |
| Beneficiary | Agricultural       | Livestock Grazers    | include   |    |    |
| Beneficiary | Agricultural       | Livestock Grazers    | near      |    |    |
| Beneficiary | Agricultural       | Livestock Grazers    | exclude   |    |    |
| Beneficiary | Agricultural       | Agricultural Process | include   |    |    |
| Beneficiary | Agricultural       | Agricultural Process | near      |    |    |
| Beneficiary | Agricultural       | Agricultural Process | exclude   |    |    |
| Beneficiary | Agricultural       | Aquaculturists       | include   |    |    |
| Beneficiary | Agricultural       | Aquaculturists       | near      |    |    |
| Beneficiary | Agricultural       | Aquaculturists       | exclude   |    |    |
| Beneficiary | Agricultural       | Farmers              | include   |    |    |
| Beneficiary | Agricultural       | Farmers              | near      |    |    |
| Beneficiary | Agricultural       | Farmers              | exclude   |    |    |
| Beneficiary | Agricultural       | Foresters            | include   |    |    |
| Beneficiary | Agricultural       | Foresters            | near      |    |    |
| Beneficiary | Agricultural       | Foresters            | exclude   |    |    |
| Beneficiary | Commerical_Industr | Commerical_Industr   | include   |    |    |

| Category    | Class              | SubClass             | Word_type | S8 | S9 |
|-------------|--------------------|----------------------|-----------|----|----|
| Beneficiary | Beneficiary        | Unknown Beneficiary  | include   |    |    |
| Beneficiary | Beneficiary        | Unknown Beneficiary  | near      |    |    |
| Beneficiary | Beneficiary        | Unknown Beneficiary  | exclude   |    |    |
| Beneficiary | Agricultural       | Agricultural         | include   |    |    |
| Beneficiary | Agricultural       | Agricultural         | exclude   |    |    |
| Beneficiary | Agricultural       | Irrigators           | include   |    |    |
| Beneficiary | Agricultural       | CAFO Operators       | include   |    |    |
| Beneficiary | Agricultural       | CAFO Operators       | near      |    |    |
| Beneficiary | Agricultural       | CAFO Operators       | exclude   |    |    |
| Beneficiary | Agricultural       | Livestock Grazers    | include   |    |    |
| Beneficiary | Agricultural       | Livestock Grazers    | near      |    |    |
| Beneficiary | Agricultural       | Livestock Grazers    | exclude   |    |    |
| Beneficiary | Agricultural       | Agricultural Process | include   |    |    |
| Beneficiary | Agricultural       | Agricultural Process | near      |    |    |
| Beneficiary | Agricultural       | Agricultural Process | exclude   |    |    |
| Beneficiary | Agricultural       | Aquaculturists       | include   |    |    |
| Beneficiary | Agricultural       | Aquaculturists       | near      |    |    |
| Beneficiary | Agricultural       | Aquaculturists       | exclude   |    |    |
| Beneficiary | Agricultural       | Farmers              | include   |    |    |
| Beneficiary | Agricultural       | Farmers              | near      |    |    |
| Beneficiary | Agricultural       | Farmers              | exclude   |    |    |
| Beneficiary | Agricultural       | Foresters            | include   |    |    |
| Beneficiary | Agricultural       | Foresters            | near      |    |    |
| Beneficiary | Agricultural       | Foresters            | exclude   |    |    |
| Beneficiary | Commerical_Industr | Commerical_Industr   | include   |    |    |

| Category    | Class              | SubClass             | Word_type | S10 | S11 |
|-------------|--------------------|----------------------|-----------|-----|-----|
| Beneficiary | Beneficiary        | Unknown Beneficiary  | include   |     |     |
| Beneficiary | Beneficiary        | Unknown Beneficiary  | near      |     |     |
| Beneficiary | Beneficiary        | Unknown Beneficiary  | exclude   |     |     |
| Beneficiary | Agricultural       | Agricultural         | include   |     |     |
| Beneficiary | Agricultural       | Agricultural         | exclude   |     |     |
| Beneficiary | Agricultural       | Irrigators           | include   |     |     |
| Beneficiary | Agricultural       | CAFO Operators       | include   |     |     |
| Beneficiary | Agricultural       | CAFO Operators       | near      |     |     |
| Beneficiary | Agricultural       | CAFO Operators       | exclude   |     |     |
| Beneficiary | Agricultural       | Livestock Grazers    | include   |     |     |
| Beneficiary | Agricultural       | Livestock Grazers    | near      |     |     |
| Beneficiary | Agricultural       | Livestock Grazers    | exclude   |     |     |
| Beneficiary | Agricultural       | Agricultural Process | include   |     |     |
| Beneficiary | Agricultural       | Agricultural Process | near      |     |     |
| Beneficiary | Agricultural       | Agricultural Process | exclude   |     |     |
| Beneficiary | Agricultural       | Aquaculturists       | include   |     |     |
| Beneficiary | Agricultural       | Aquaculturists       | near      |     |     |
| Beneficiary | Agricultural       | Aquaculturists       | exclude   |     |     |
| Beneficiary | Agricultural       | Farmers              | include   |     |     |
| Beneficiary | Agricultural       | Farmers              | near      |     |     |
| Beneficiary | Agricultural       | Farmers              | exclude   |     |     |
| Beneficiary | Agricultural       | Foresters            | include   |     |     |
| Beneficiary | Agricultural       | Foresters            | near      |     |     |
| Beneficiary | Agricultural       | Foresters            | exclude   |     |     |
| Beneficiary | Commerical_Industr | Commerical_Industr   | include   |     |     |

| Category    | Class              | SubClass             | Word_type | S12 | S13 |
|-------------|--------------------|----------------------|-----------|-----|-----|
| Beneficiary | Beneficiary        | Unknown Beneficiary  | include   |     |     |
| Beneficiary | Beneficiary        | Unknown Beneficiary  | near      |     |     |
| Beneficiary | Beneficiary        | Unknown Beneficiary  | exclude   |     |     |
| Beneficiary | Agricultural       | Agricultural         | include   |     |     |
| Beneficiary | Agricultural       | Agricultural         | exclude   |     |     |
| Beneficiary | Agricultural       | Irrigators           | include   |     |     |
| Beneficiary | Agricultural       | CAFO Operators       | include   |     |     |
| Beneficiary | Agricultural       | CAFO Operators       | near      |     |     |
| Beneficiary | Agricultural       | CAFO Operators       | exclude   |     |     |
| Beneficiary | Agricultural       | Livestock Grazers    | include   |     |     |
| Beneficiary | Agricultural       | Livestock Grazers    | near      |     |     |
| Beneficiary | Agricultural       | Livestock Grazers    | exclude   |     |     |
| Beneficiary | Agricultural       | Agricultural Process | include   |     |     |
| Beneficiary | Agricultural       | Agricultural Process | near      |     |     |
| Beneficiary | Agricultural       | Agricultural Process | exclude   |     |     |
| Beneficiary | Agricultural       | Aquaculturists       | include   |     |     |
| Beneficiary | Agricultural       | Aquaculturists       | near      |     |     |
| Beneficiary | Agricultural       | Aquaculturists       | exclude   |     |     |
| Beneficiary | Agricultural       | Farmers              | include   |     |     |
| Beneficiary | Agricultural       | Farmers              | near      |     |     |
| Beneficiary | Agricultural       | Farmers              | exclude   |     |     |
| Beneficiary | Agricultural       | Foresters            | include   |     |     |
| Beneficiary | Agricultural       | Foresters            | near      |     |     |
| Beneficiary | Agricultural       | Foresters            | exclude   |     |     |
| Beneficiary | Commerical_Industr | Commerical_Industr   | include   |     |     |

| Category    | Class               | SubClass                      | Word_type | S1                                                                                                                                                                                                                                                                                                                                                                                                                                                                                                                                                                                                                                                                                                                                                                                                                                                                                                                                                                                                                                                                                    |
|-------------|---------------------|-------------------------------|-----------|---------------------------------------------------------------------------------------------------------------------------------------------------------------------------------------------------------------------------------------------------------------------------------------------------------------------------------------------------------------------------------------------------------------------------------------------------------------------------------------------------------------------------------------------------------------------------------------------------------------------------------------------------------------------------------------------------------------------------------------------------------------------------------------------------------------------------------------------------------------------------------------------------------------------------------------------------------------------------------------------------------------------------------------------------------------------------------------|
| Beneficiary | Commerical_Industri | Commerical_Industri near      |           |                                                                                                                                                                                                                                                                                                                                                                                                                                                                                                                                                                                                                                                                                                                                                                                                                                                                                                                                                                                                                                                                                       |
| Beneficiary | Commerical_Industri | Commerical_Industri exclude   |           | commercial fish commercial shellfish commercial and sport fish commercial and recreational fish commercial pilot commercial vessel commercial ship commercial boat                                                                                                                                                                                                                                                                                                                                                                                                                                                                                                                                                                                                                                                                                                                                                                                                                                                                                                                    |
| Beneficiary | Commerical_Industri | Food Extractors               | include   | hunt.*meat trap.*meat meat.*hunt meat.*trap hunt.*edible trap.*edible edible.*hunt edible.*trap hunt.*consumpt trap.*consumpt consumpt.*hunt consumpt.*trap hunt.*eaten trap.*eaten eaten.*hunt eaten.*trap                                                                                                                                                                                                                                                                                                                                                                                                                                                                                                                                                                                                                                                                                                                                                                                                                                                                           |
| Beneficiary | Commerical_Industri | Food Extractors               | near      | extract commercial business product industry commodity commodities goods harvest profit buy livelihood job dealer market corporation sale sell income artisan profession trade trading worker                                                                                                                                                                                                                                                                                                                                                                                                                                                                                                                                                                                                                                                                                                                                                                                                                                                                                         |
| Beneficiary | Commerical_Industri | Food Extractors               | exclude   | riparian buffer vegetat extrapolat strap entrap strap sediment.*trap contam.*trap pollut.*trap trap.*contam trap.*pollut nutrient.*trap trap.*nutrient sand.*trap trap.*sand trap.*sediment litter trap imping trap.*sediment sediment.*trap contam.*trap pollut.*trap trap.*contam trap.*pollut nutrient.*trap trap.*nutrient sand.*trap trap.*sand litter trap fish trap association shunt huntley huntington hunterdon workshop saalem mysella economy Harvest brodiaea                                                                                                                                                                                                                                                                                                                                                                                                                                                                                                                                                                                                            |
| Beneficiary | Commerical_Industri | Timber and Fiber and          | include   | pine wood pulp tree timber oak elm lumber cedar pine oak cypress elm ash maple hickory hardwood cordwood reed grass salt hay marsh hay turpentine                                                                                                                                                                                                                                                                                                                                                                                                                                                                                                                                                                                                                                                                                                                                                                                                                                                                                                                                     |
| Beneficiary | Commerical_Industri | Timber and Fiber and          | near      | extract commercial business product industry commodity commodities goods harvest profit buy livelihood job dealer market corporation sale sell income artisan profession trade trading worker                                                                                                                                                                                                                                                                                                                                                                                                                                                                                                                                                                                                                                                                                                                                                                                                                                                                                         |
| Beneficiary | Commerical_Industri | Timber and Fiber and          | exclude   | grassroot grass-root reproduct productivity marshfield marshall braintree park sea grass freed mcreedy sea-grass eelgrass oyster.*grass seagrass grassland sea-grass decreed breed agreed haynes hay.*barn hayden cottonwood freed cottontail reedgrass hay woody lakewood kirkwood woodpecker woods hole wood dock wood preserv woodneck woodbury wood stake wooden wood tick woodland wood turtle tree frog woodbridge treated lumber treated wood wood stove reproduct cash category sewage sanitary acquatic management.*area fish wash dnr mcbp trash shoreline pineda pinellas legend pine.*island pine.*barren vash elmer elm st ashe coal ash mash sash cash bash overwhelm oakdale oakley croak coal.*ash delmarva fashion pineland barrier.*island water.*pollution soak pine.*beach over.*whelm barrier.*beach ashore sand.*pine shorebird percent metals oakland silverside hash develm hairstreak crash pine.*hills ocean.*pine oak.*harbor oak.*ridge pine.*seed workshop saalem mysella economy woodfern sandalwoods wood satyr wood borer wood nymph Harvest brodiaea |
| Beneficiary | Commerical_Industri | Industrial Processors         | include   | industr.*process process.*industr commercial.*process process.*commercial industr.*product product.*industr                                                                                                                                                                                                                                                                                                                                                                                                                                                                                                                                                                                                                                                                                                                                                                                                                                                                                                                                                                           |
| Beneficiary | Commerical_Industri | Industrial Processors near    |           |                                                                                                                                                                                                                                                                                                                                                                                                                                                                                                                                                                                                                                                                                                                                                                                                                                                                                                                                                                                                                                                                                       |
| Beneficiary | Commerical_Industri | Industrial Processors exclude |           | in the process farm agricultur commercial fish commercial shellfish commercial and sport fish commercial and recreational fish commercial pilot commercial vessel commercial ship commercial boat                                                                                                                                                                                                                                                                                                                                                                                                                                                                                                                                                                                                                                                                                                                                                                                                                                                                                     |
| Beneficiary | Commerical_Industri | Industrial Discharger         | include   | industr factory factories manufactur facility facilities                                                                                                                                                                                                                                                                                                                                                                                                                                                                                                                                                                                                                                                                                                                                                                                                                                                                                                                                                                                                                              |
| Beneficiary | Commerical_Industri | Industrial Discharger near    |           | discharg waste effluent leach                                                                                                                                                                                                                                                                                                                                                                                                                                                                                                                                                                                                                                                                                                                                                                                                                                                                                                                                                                                                                                                         |
| Beneficiary | Commerical_Industri | Industrial Discharger exclude |           | sewage.*treatment treatment.*sewage wastewater.*treatment treatment.*wastewater action department satisfactor                                                                                                                                                                                                                                                                                                                                                                                                                                                                                                                                                                                                                                                                                                                                                                                                                                                                                                                                                                         |
| Beneficiary | Commerical_Industri | Electric and other En         | include   | power.*plant power line powerline                                                                                                                                                                                                                                                                                                                                                                                                                                                                                                                                                                                                                                                                                                                                                                                                                                                                                                                                                                                                                                                     |
| Beneficiary | Commerical_Industri | Electric and other En near    |           |                                                                                                                                                                                                                                                                                                                                                                                                                                                                                                                                                                                                                                                                                                                                                                                                                                                                                                                                                                                                                                                                                       |
| Beneficiary | Commerical_Industri | Electric and other En exclude |           | office.*of department program degrade.*habitat electric eel electric ray                                                                                                                                                                                                                                                                                                                                                                                                                                                                                                                                                                                                                                                                                                                                                                                                                                                                                                                                                                                                              |
| Beneficiary | Commerical_Industri | Resource-Dependent            | include   | marina tourism resort hotel shop restaurant landscaper gardener landscaping landscape industry                                                                                                                                                                                                                                                                                                                                                                                                                                                                                                                                                                                                                                                                                                                                                                                                                                                                                                                                                                                        |
| Beneficiary | Commerical_Industri | Resource-Dependent near       |           |                                                                                                                                                                                                                                                                                                                                                                                                                                                                                                                                                                                                                                                                                                                                                                                                                                                                                                                                                                                                                                                                                       |

| Category    | Class               | SubClass              | Word_type | S2                                                                                                                                                                                                                                                                                                                                                                                                                                                                                                                                                                                                                                                                                                                                                                                                                                                                                                                                                                                                                                                                                                                                                                                                                                        | S3                                                                                                                                                                                                                                                                           |
|-------------|---------------------|-----------------------|-----------|-------------------------------------------------------------------------------------------------------------------------------------------------------------------------------------------------------------------------------------------------------------------------------------------------------------------------------------------------------------------------------------------------------------------------------------------------------------------------------------------------------------------------------------------------------------------------------------------------------------------------------------------------------------------------------------------------------------------------------------------------------------------------------------------------------------------------------------------------------------------------------------------------------------------------------------------------------------------------------------------------------------------------------------------------------------------------------------------------------------------------------------------------------------------------------------------------------------------------------------------|------------------------------------------------------------------------------------------------------------------------------------------------------------------------------------------------------------------------------------------------------------------------------|
| Beneficiary | Commerical_Industri | Commerical_Industri   | near      |                                                                                                                                                                                                                                                                                                                                                                                                                                                                                                                                                                                                                                                                                                                                                                                                                                                                                                                                                                                                                                                                                                                                                                                                                                           |                                                                                                                                                                                                                                                                              |
| Beneficiary | Commerical_Industri | Commerical_Industri   | exclude   | secretary department chamber noaa                                                                                                                                                                                                                                                                                                                                                                                                                                                                                                                                                                                                                                                                                                                                                                                                                                                                                                                                                                                                                                                                                                                                                                                                         |                                                                                                                                                                                                                                                                              |
| Beneficiary | Commerical_Industri | Food Extractors       | include   | fishing shrimping clamming fisher<br>extract commercial business product industry commodity commodities goods <br>harvest profit buy livelihood job dealer market corporation sale sell income ar<br>tisan profession trade trading worker                                                                                                                                                                                                                                                                                                                                                                                                                                                                                                                                                                                                                                                                                                                                                                                                                                                                                                                                                                                                | fisheries fishery                                                                                                                                                                                                                                                            |
| Beneficiary | Commerical_Industri | Food Extractors       | near      |                                                                                                                                                                                                                                                                                                                                                                                                                                                                                                                                                                                                                                                                                                                                                                                                                                                                                                                                                                                                                                                                                                                                                                                                                                           |                                                                                                                                                                                                                                                                              |
| Beneficiary | Commerical_Industri | Food Extractors       | exclude   | kingfisher workshop salem mysella eonomus newmarket fort fisher Harvest<br>brodiaea Harvest brodiaea                                                                                                                                                                                                                                                                                                                                                                                                                                                                                                                                                                                                                                                                                                                                                                                                                                                                                                                                                                                                                                                                                                                                      |                                                                                                                                                                                                                                                                              |
| Beneficiary | Commerical_Industri | Timber and Fiber and  | include   | logging logger timber                                                                                                                                                                                                                                                                                                                                                                                                                                                                                                                                                                                                                                                                                                                                                                                                                                                                                                                                                                                                                                                                                                                                                                                                                     | shells seahorse aquarium aquaria ornamental pet store aquatic plant<br>extract commercial business product industry commodity commodities goods <br>harvest profit buy livelihood job dealer market corporation sale sell income ar<br>tisan profession trade trading worker |
| Beneficiary | Commerical_Industri | Timber and Fiber and  | near      |                                                                                                                                                                                                                                                                                                                                                                                                                                                                                                                                                                                                                                                                                                                                                                                                                                                                                                                                                                                                                                                                                                                                                                                                                                           |                                                                                                                                                                                                                                                                              |
| Beneficiary | Commerical_Industri | Timber and Fiber and  | exclude   | temperature.*log log.*temperature clogging loggerhead data<br>logg datalogg timber<br>snake clogging woody invasive nonnative non.*native manage plan goal legisla<br>t fish threat.*watershed watershed.*threat threat.*habitat habitat.*threat har<br>mful marine http sewage sanitary aquatic plastic management.*area runoff st<br>ormwater dredg greek ocean sea coast septic university mcbp landed landing <br>landmark council forestry.*service forestabish shoreline geologic forest.*stewar<br>dship lakewood aquatic.*structure survey perservativ woodneck woods.*hole u<br>sda forest.*service kirkwood toxic toxin barrier.*island water.*pollution beach<br>wood treated.*timber treated.*wood hollywood wood.*neck barrier.*beach sh<br>orebird percent metals brentwood silverside loblolly contamin department.*of.<br>*forest psu project.*park.*water forest.*committee baywood aquatic.*inventory <br>wood.*stove legend habitat.*conversion.*loss.*forest.*cover kelp.*forest table f<br>igure characterized.*as forest.*learning.*shelter vincent cdmo unnacceptable 15.<br>*visitor wooden.*marco litter.*retard treated lumber rattle snake data timber<br>creek timberneck timber support joist joe timberland | eggshell shellstock workshop productivity reproduct salem mysella eonomus <br>Harvest brodiaea                                                                                                                                                                               |
| Beneficiary | Commerical_Industri | Industrial Processors | include   | manufact textile steel sawmill factory factories canneries cannery papermill pa<br>per mill                                                                                                                                                                                                                                                                                                                                                                                                                                                                                                                                                                                                                                                                                                                                                                                                                                                                                                                                                                                                                                                                                                                                               | mill                                                                                                                                                                                                                                                                         |
| Beneficiary | Commerical_Industri | Industrial Processors | near      |                                                                                                                                                                                                                                                                                                                                                                                                                                                                                                                                                                                                                                                                                                                                                                                                                                                                                                                                                                                                                                                                                                                                                                                                                                           | industr business product commercial company                                                                                                                                                                                                                                  |
| Beneficiary | Commerical_Industri | Industrial Processors | exclude   | steelhead instruction sawmill pond satisfactor geotext                                                                                                                                                                                                                                                                                                                                                                                                                                                                                                                                                                                                                                                                                                                                                                                                                                                                                                                                                                                                                                                                                                                                                                                    | reproduct million millimeter millennia milliliter millirem milligram miller mill.*c<br>reek agricult farm grain food                                                                                                                                                         |
| Beneficiary | Commerical_Industri | Industrial Discharger | include   | landfill land fill                                                                                                                                                                                                                                                                                                                                                                                                                                                                                                                                                                                                                                                                                                                                                                                                                                                                                                                                                                                                                                                                                                                                                                                                                        | effluent                                                                                                                                                                                                                                                                     |
| Beneficiary | Commerical_Industri | Industrial Discharger | near      |                                                                                                                                                                                                                                                                                                                                                                                                                                                                                                                                                                                                                                                                                                                                                                                                                                                                                                                                                                                                                                                                                                                                                                                                                                           |                                                                                                                                                                                                                                                                              |
| Beneficiary | Commerical_Industri | Industrial Discharger | exclude   |                                                                                                                                                                                                                                                                                                                                                                                                                                                                                                                                                                                                                                                                                                                                                                                                                                                                                                                                                                                                                                                                                                                                                                                                                                           |                                                                                                                                                                                                                                                                              |
| Beneficiary | Commerical_Industri | Electric and other En | include   | solar.*power solar.*electric solar.*energy energy.*solar electric.*solar power.*:<br>olar turbine                                                                                                                                                                                                                                                                                                                                                                                                                                                                                                                                                                                                                                                                                                                                                                                                                                                                                                                                                                                                                                                                                                                                         | wind.*power wind.*electric wind.*energy energy.*wind electric.*wind power.*<br>wind                                                                                                                                                                                          |
| Beneficiary | Commerical_Industri | Electric and other En | near      |                                                                                                                                                                                                                                                                                                                                                                                                                                                                                                                                                                                                                                                                                                                                                                                                                                                                                                                                                                                                                                                                                                                                                                                                                                           |                                                                                                                                                                                                                                                                              |
| Beneficiary | Commerical_Industri | Electric and other En | exclude   |                                                                                                                                                                                                                                                                                                                                                                                                                                                                                                                                                                                                                                                                                                                                                                                                                                                                                                                                                                                                                                                                                                                                                                                                                                           | storm energy wave energy                                                                                                                                                                                                                                                     |
| Beneficiary | Commerical_Industri | Resource-Dependent    | include   | resource                                                                                                                                                                                                                                                                                                                                                                                                                                                                                                                                                                                                                                                                                                                                                                                                                                                                                                                                                                                                                                                                                                                                                                                                                                  | waterfront                                                                                                                                                                                                                                                                   |
| Beneficiary | Commerical_Industri | Resource-Dependent    | near      | business industry dependent occupation extraction                                                                                                                                                                                                                                                                                                                                                                                                                                                                                                                                                                                                                                                                                                                                                                                                                                                                                                                                                                                                                                                                                                                                                                                         | working develop                                                                                                                                                                                                                                                              |

| Category    | Class               | SubClass              | Word_type | S4                                                                                                                                                                                                                      | S5                                                                                                                                                                                                                                                        |
|-------------|---------------------|-----------------------|-----------|-------------------------------------------------------------------------------------------------------------------------------------------------------------------------------------------------------------------------|-----------------------------------------------------------------------------------------------------------------------------------------------------------------------------------------------------------------------------------------------------------|
| Beneficiary | Commerical_Industri | Commerical_Industri   | near      |                                                                                                                                                                                                                         |                                                                                                                                                                                                                                                           |
| Beneficiary | Commerical_Industri | Commerical_Industri   | exclude   |                                                                                                                                                                                                                         |                                                                                                                                                                                                                                                           |
| Beneficiary | Commerical_Industri | Food Extractors       | include   | shellfish fish oyster clam scallop mussel shrimp meat crab salmon oyster pike crab lobster mullet mussel bass herring grouper snapper alewife flounder abalone scallop clam geoduck crawfish crayfish crustacea seafood | deer turkey quail waterfowl duck goose geese                                                                                                                                                                                                              |
| Beneficiary | Commerical_Industri | Food Extractors       | near      | extract commercial business product industry commodity commodities goods harvest profit buy livelihood job dealer market corporation sale sell income artisan profession trade trading worker                           | extract commercial business product industry commodity commodities goods harvest profit buy livelihood job dealer market corporation sale sell income artisan profession trade trading worker                                                             |
| Beneficiary | Commerical_Industri | Food Extractors       | exclude   | productivity production workshop ambassador salmon falls salem mysella economus newmarket oyster creek clami spike Harvest brodiaea                                                                                     | productivity production workshop duck farm salem mysella economus Harvest brodiaea                                                                                                                                                                        |
| Beneficiary | Commerical_Industri | Timber and Fiber and  | include   | shell mining                                                                                                                                                                                                            | firewood                                                                                                                                                                                                                                                  |
| Beneficiary | Commerical_Industri | Timber and Fiber and  | near      |                                                                                                                                                                                                                         | extract commercial business product industry commodity commodities goods harvest profit buy livelihood job dealer market corporation sale sell income artisan profession trade trading worker                                                             |
| Beneficiary | Commerical_Industri | Timber and Fiber and  | exclude   |                                                                                                                                                                                                                         | workshop productivity reproduct salem mysella economus                                                                                                                                                                                                    |
| Beneficiary | Commerical_Industri | Industrial Processors | include   | chemical iron metal oil gas petro lime                                                                                                                                                                                  | mining mine quarry                                                                                                                                                                                                                                        |
| Beneficiary | Commerical_Industri | Industrial Processors | near      | industr factory factories manufact foundry foundries operation refiner facilit                                                                                                                                          | data.*min determining examining determine examine promine mineral flumine a shells minen mineu amine plaquemine ermin minello deter-min deter-min minea post-min division omine smine reclaim.*min min.*reclaim min.*reclam reclam.*min under-min lettuce |
| Beneficiary | Commerical_Industri | Industrial Processors | exclude   | viron soil slime blime clime elime plime                                                                                                                                                                                |                                                                                                                                                                                                                                                           |
| Beneficiary | Commerical_Industri | Industrial Discharger | include   |                                                                                                                                                                                                                         |                                                                                                                                                                                                                                                           |
| Beneficiary | Commerical_Industri | Industrial Discharger | near      |                                                                                                                                                                                                                         |                                                                                                                                                                                                                                                           |
| Beneficiary | Commerical_Industri | Industrial Discharger | exclude   |                                                                                                                                                                                                                         |                                                                                                                                                                                                                                                           |
| Beneficiary | Commerical_Industri | Electric and other En | include   | hydro.*electric dam.*electric electric.*dam dam.*energy energy.*dam                                                                                                                                                     | renewable.*energy renewable.*power renewable.*electric energy.*renewable power.*renewable electric.*renewable                                                                                                                                             |
| Beneficiary | Commerical_Industri | Electric and other En | near      |                                                                                                                                                                                                                         |                                                                                                                                                                                                                                                           |
| Beneficiary | Commerical_Industri | Electric and other En | exclude   | electric eel electric ray storm energy wave energy                                                                                                                                                                      |                                                                                                                                                                                                                                                           |
| Beneficiary | Commerical_Industri | Resource-Dependent    | include   | outfitter tour.*boat charter.*boat                                                                                                                                                                                      | fish hunt tour recreat trip                                                                                                                                                                                                                               |
| Beneficiary | Commerical_Industri | Resource-Dependent    | near      |                                                                                                                                                                                                                         | charter guide                                                                                                                                                                                                                                             |

| Category    | Class               | SubClass              | Word_type | S6                                                                                 | S7                                                                                                                                                                                      |
|-------------|---------------------|-----------------------|-----------|------------------------------------------------------------------------------------|-----------------------------------------------------------------------------------------------------------------------------------------------------------------------------------------|
| Beneficiary | Commerical_Industri | Commerical_Industri   | near      |                                                                                    |                                                                                                                                                                                         |
| Beneficiary | Commerical_Industri | Commerical_Industri   | exclude   |                                                                                    |                                                                                                                                                                                         |
| Beneficiary | Commerical_Industri | Food Extractors       | include   | food.*eat eat.*food food source                                                    | plant foods food supply                                                                                                                                                                 |
| Beneficiary | Commerical_Industri | Food Extractors       | near      | human we people                                                                    |                                                                                                                                                                                         |
| Beneficiary | Commerical_Industri | Food Extractors       | exclude   |                                                                                    |                                                                                                                                                                                         |
| Beneficiary | Commerical_Industri | Timber and Fiber and  | include   |                                                                                    |                                                                                                                                                                                         |
| Beneficiary | Commerical_Industri | Timber and Fiber and  | near      |                                                                                    |                                                                                                                                                                                         |
| Beneficiary | Commerical_Industri | Timber and Fiber and  | exclude   |                                                                                    |                                                                                                                                                                                         |
| Beneficiary | Commerical_Industri | Industrial Processors | include   | process                                                                            |                                                                                                                                                                                         |
| Beneficiary | Commerical_Industri | Industrial Processors | near      | seafood fish shellfish                                                             |                                                                                                                                                                                         |
| Beneficiary | Commerical_Industri | Industrial Processors | exclude   | meat sugar grain vegetable fruit permit eutrophication degradation review bay view |                                                                                                                                                                                         |
| Beneficiary | Commerical_Industri | Industrial Discharger | include   |                                                                                    |                                                                                                                                                                                         |
| Beneficiary | Commerical_Industri | Industrial Discharger | near      |                                                                                    |                                                                                                                                                                                         |
| Beneficiary | Commerical_Industri | Industrial Discharger | exclude   |                                                                                    |                                                                                                                                                                                         |
| Beneficiary | Commerical_Industri | Electric and other En | include   | utilities                                                                          | energy power electric                                                                                                                                                                   |
| Beneficiary | Commerical_Industri | Electric and other En | near      |                                                                                    | production industr generat suppl station                                                                                                                                                |
| Beneficiary | Commerical_Industri | Electric and other En | exclude   | water.*utilities                                                                   | storm energy wave energy powerful food suppl                                                                                                                                            |
| Beneficiary | Commerical_Industri | Resource-Dependent    | include   | business industr econom                                                            | bait                                                                                                                                                                                    |
| Beneficiary | Commerical_Industri | Resource-Dependent    | near      | local                                                                              | commercial business industry commodity commodities goods profit buy livelihood job dealer market corporation sale sell income artisan profession trade trading worker fishery fisheries |

| Category    | Class               | SubClass              | Word_type | S8                                                                                                | S9      |
|-------------|---------------------|-----------------------|-----------|---------------------------------------------------------------------------------------------------|---------|
| Beneficiary | Commerical_Industri | Commerical_Industri   | near      |                                                                                                   |         |
| Beneficiary | Commerical_Industri | Commerical_Industri   | exclude   |                                                                                                   |         |
| Beneficiary | Commerical_Industri | Food Extractors       | include   |                                                                                                   |         |
| Beneficiary | Commerical_Industri | Food Extractors       | near      |                                                                                                   |         |
| Beneficiary | Commerical_Industri | Food Extractors       | exclude   |                                                                                                   |         |
| Beneficiary | Commerical_Industri | Timber and Fiber and  | include   |                                                                                                   |         |
| Beneficiary | Commerical_Industri | Timber and Fiber and  | near      |                                                                                                   |         |
| Beneficiary | Commerical_Industri | Timber and Fiber and  | exclude   |                                                                                                   |         |
| Beneficiary | Commerical_Industri | Industrial Processors | include   |                                                                                                   |         |
| Beneficiary | Commerical_Industri | Industrial Processors | near      |                                                                                                   |         |
| Beneficiary | Commerical_Industri | Industrial Processors | exclude   |                                                                                                   |         |
| Beneficiary | Commerical_Industri | Industrial Discharger | include   |                                                                                                   |         |
| Beneficiary | Commerical_Industri | Industrial Discharger | near      |                                                                                                   |         |
| Beneficiary | Commerical_Industri | Industrial Discharger | exclude   |                                                                                                   |         |
| Beneficiary | Commerical_Industri | Electric and other En | include   | nuclear.*energy nuclear.*power nuclear.*electric energy.*nuclear power.*nuclear electric.*nuclear |         |
| Beneficiary | Commerical_Industri | Electric and other En | near      |                                                                                                   |         |
| Beneficiary | Commerical_Industri | Electric and other En | exclude   |                                                                                                   |         |
| Beneficiary | Commerical_Industri | Resource-Dependent    | include   | marine-related business                                                                           | artisan |
| Beneficiary | Commerical_Industri | Resource-Dependent    | near      |                                                                                                   |         |

| Category    | Class               | SubClass              | Word_type | S10 | S11 |
|-------------|---------------------|-----------------------|-----------|-----|-----|
| Beneficiary | Commerical_Industri | Commerical_Industri   | near      |     |     |
| Beneficiary | Commerical_Industri | Commerical_Industri   | exclude   |     |     |
| Beneficiary | Commerical_Industri | Food Extractors       | include   |     |     |
| Beneficiary | Commerical_Industri | Food Extractors       | near      |     |     |
| Beneficiary | Commerical_Industri | Food Extractors       | exclude   |     |     |
| Beneficiary | Commerical_Industri | Timber and Fiber and  | include   |     |     |
| Beneficiary | Commerical_Industri | Timber and Fiber and  | near      |     |     |
| Beneficiary | Commerical_Industri | Timber and Fiber and  | exclude   |     |     |
| Beneficiary | Commerical_Industri | Industrial Processors | include   |     |     |
| Beneficiary | Commerical_Industri | Industrial Processors | near      |     |     |
| Beneficiary | Commerical_Industri | Industrial Processors | exclude   |     |     |
| Beneficiary | Commerical_Industri | Industrial Discharger | include   |     |     |
| Beneficiary | Commerical_Industri | Industrial Discharger | near      |     |     |
| Beneficiary | Commerical_Industri | Industrial Discharger | exclude   |     |     |
| Beneficiary | Commerical_Industri | Electric and other En | include   |     |     |
| Beneficiary | Commerical_Industri | Electric and other En | near      |     |     |
| Beneficiary | Commerical_Industri | Electric and other En | exclude   |     |     |
| Beneficiary | Commerical_Industri | Resource-Dependent    | include   |     |     |
| Beneficiary | Commerical_Industri | Resource-Dependent    | near      |     |     |

| Category    | Class               | SubClass              | Word_type | S12 | S13 |
|-------------|---------------------|-----------------------|-----------|-----|-----|
| Beneficiary | Commerical_Industri | Commerical_Industri   | near      |     |     |
| Beneficiary | Commerical_Industri | Commerical_Industri   | exclude   |     |     |
| Beneficiary | Commerical_Industri | Food Extractors       | include   |     |     |
| Beneficiary | Commerical_Industri | Food Extractors       | near      |     |     |
| Beneficiary | Commerical_Industri | Food Extractors       | exclude   |     |     |
| Beneficiary | Commerical_Industri | Timber and Fiber and  | include   |     |     |
| Beneficiary | Commerical_Industri | Timber and Fiber and  | near      |     |     |
| Beneficiary | Commerical_Industri | Timber and Fiber and  | exclude   |     |     |
| Beneficiary | Commerical_Industri | Industrial Processors | include   |     |     |
| Beneficiary | Commerical_Industri | Industrial Processors | near      |     |     |
| Beneficiary | Commerical_Industri | Industrial Processors | exclude   |     |     |
| Beneficiary | Commerical_Industri | Industrial Discharger | include   |     |     |
| Beneficiary | Commerical_Industri | Industrial Discharger | near      |     |     |
| Beneficiary | Commerical_Industri | Industrial Discharger | exclude   |     |     |
| Beneficiary | Commerical_Industri | Electric and other En | include   |     |     |
| Beneficiary | Commerical_Industri | Electric and other En | near      |     |     |
| Beneficiary | Commerical_Industri | Electric and other En | exclude   |     |     |
| Beneficiary | Commerical_Industri | Resource-Dependent    | include   |     |     |
| Beneficiary | Commerical_Industri | Resource-Dependent    | near      |     |     |

| Category    | Class               | SubClass             | Word_type | S1                                                                                                                                                             |
|-------------|---------------------|----------------------|-----------|----------------------------------------------------------------------------------------------------------------------------------------------------------------|
| Beneficiary | Commerical_Industri | Resource-Dependent   | exclude   | coast.*guard zostera marina.*guidebook vistamar.*marina recreational.*boating negative workshop first resort last resort resort to grasshop zostera bishop     |
| Beneficiary | Commerical_Industri | Pharmaceutical and   | include   | pharmaceutical medicin vitamin drug medical surgical                                                                                                           |
| Beneficiary | Commerical_Industri | Pharmaceutical and   | I near    | species discovery research harvest development testing purpose                                                                                                 |
| Beneficiary | Commerical_Industri | Pharmaceutical and   | I exclude |                                                                                                                                                                |
| Beneficiary | Commerical_Industri | Fur_Hide Trappers a  | include   | skin hide  fur   furs  fur-bear fur bear furbear pelt tanning tannery tanneries                                                                                |
| Beneficiary | Commerical_Industri | Fur_Hide Trappers a  | I near    | extract commercial business product industry commodity commodities goods harvest profit buy livelihood job dealer market corporation sale sell income a        |
| Beneficiary | Commerical_Industri | Fur_Hide Trappers a  | I near    | tisan profession trade trading worker                                                                                                                          |
| Beneficiary | Commerical_Industri | Fur_Hide Trappers a  | I exclude | reproduct askin pickerel sking sale mysella economus newmarket sulfur peltandra pelto apelt peltu pelta pelte provid.*no clue provid.*notice provid.*          |
| Beneficiary | Commerical_Industri | Fur_Hide Trappers a  | I exclude | basis provid.*expertise workshop skink skin lesion skin condition furc iskin refur pelti                                                                       |
| Beneficiary | Government and Mu   | Government and Mu    | include   | government municipal village county infrastructur property  town  city public access the public public use urban rural public good public purpose              |
| Beneficiary | Government and Mu   | Government and Mu    | I near    |                                                                                                                                                                |
| Beneficiary | Government and Mu   | Government and Mu    | I exclude | legend turban capacity publicize publicity publication townsend                                                                                                |
| Beneficiary | Government and Mu   | Municipal Drinking V | include   | drink.*water water.*supply water.*drink supply.*water                                                                                                          |
| Beneficiary | Government and Mu   | Municipal Drinking V | I exclude | watershed wastewater permit division.*water waterway waterbod                                                                                                  |
| Beneficiary | Government and Mu   | Wastewater Treatme   | include   | water.*treatment treatment.*water sewage.*treatment treatment.*sewage treatment.*plant                                                                         |
| Beneficiary | Government and Mu   | Wastewater Treatme   | I exclude | watershed wastewater permit division.*water waterway waterbod                                                                                                  |
| Beneficiary | Government and Mu   | Residential Property | include   | resident.*develop develop.*resident homeowner home owner private.*land private.*property landowner land owner private owner                                    |
| Beneficiary | Government and Mu   | Residential Property | I near    | president acqui restor purchase buy resident.*species resident.*wildlife resident.*animal property.*tax tax.*property tax.*resident resident.*tax developing.* |
| Beneficiary | Government and Mu   | Residential Property | I exclude | ecommodation island                                                                                                                                            |
| Beneficiary | Government and Mu   | Military_Coast Guard | include   | military coast.*guard navy army marines air force                                                                                                              |
| Beneficiary | Government and Mu   | Military_Coast Guard | I exclude | marinesanc marineserv marinespa                                                                                                                                |
| Beneficiary | Commercial_Military | Commercial_Military  | include   | commercial.*transport transport.*commercial military.*transport transport.*military                                                                            |
| Beneficiary | Commercial_Military | Commercial_Military  | I near    |                                                                                                                                                                |
| Beneficiary | Commercial_Military | Commercial_Military  | I exclude | sediment.*transport transport.*sediment contam.*transport transport.*contam nutrient.*transport transport.*nutrient cargo goods shipping freight commodit      |
| Beneficiary | Commercial_Military | Transporters of Good | include   | container people commut                                                                                                                                        |
| Beneficiary | Commercial_Military | Transporters of Good | I near    | goods.*transport transport.*goods shipping shipped cargo freight bulk.*commodit                                                                                |
| Beneficiary | Commercial_Military | Transporters of Good | I near    |                                                                                                                                                                |

| Category    | Class               | SubClass             | Word_type | S2                                                                                                                                                                                                                                                                                                                                                                                                                                                                                                                                                                                                                                                                                                             | S3                                                                                                                                                                                                                                                                                                                                                                                               |
|-------------|---------------------|----------------------|-----------|----------------------------------------------------------------------------------------------------------------------------------------------------------------------------------------------------------------------------------------------------------------------------------------------------------------------------------------------------------------------------------------------------------------------------------------------------------------------------------------------------------------------------------------------------------------------------------------------------------------------------------------------------------------------------------------------------------------|--------------------------------------------------------------------------------------------------------------------------------------------------------------------------------------------------------------------------------------------------------------------------------------------------------------------------------------------------------------------------------------------------|
| Beneficiary | Commerical_Industri | Resource-Dependent   | exclude   | independent interdependent                                                                                                                                                                                                                                                                                                                                                                                                                                                                                                                                                                                                                                                                                     | haddock                                                                                                                                                                                                                                                                                                                                                                                          |
| Beneficiary | Commerical_Industri | Pharmaceutical and   | include   | supplement                                                                                                                                                                                                                                                                                                                                                                                                                                                                                                                                                                                                                                                                                                     | biotechnology bio-technology                                                                                                                                                                                                                                                                                                                                                                     |
| Beneficiary | Commerical_Industri | Pharmaceutical and   | near      | food nutrition nutrient                                                                                                                                                                                                                                                                                                                                                                                                                                                                                                                                                                                                                                                                                        |                                                                                                                                                                                                                                                                                                                                                                                                  |
| Beneficiary | Commerical_Industri | Pharmaceutical and   | exclude   | water.*supplement supplement.*water steelhead.*supplement technical supplement supplemental supplemented                                                                                                                                                                                                                                                                                                                                                                                                                                                                                                                                                                                                       |                                                                                                                                                                                                                                                                                                                                                                                                  |
| Beneficiary | Commerical_Industri | Fur_Hide Trappers a  | include   | nutria beaver deer alligator hogs rabbit                                                                                                                                                                                                                                                                                                                                                                                                                                                                                                                                                                                                                                                                       | hunt trap                                                                                                                                                                                                                                                                                                                                                                                        |
| Beneficiary | Commerical_Industri | Fur_Hide Trappers a  | near      | extract commercial business product industry commodity commodities goods harvest profit buy livelihood job dealer market corporation sale sell income ar tisan profession trade trading worker                                                                                                                                                                                                                                                                                                                                                                                                                                                                                                                 | extract commercial business product industry commodity commodities goods harvest profit buy livelihood job dealer market corporation sale sell income ar tisan profession trade trading worker                                                                                                                                                                                                   |
| Beneficiary | Commerical_Industri | Fur_Hide Trappers a  | exclude   | reproduct deerfield productiv harvest.*crop crop.*harvest harvest data production workshop saalem mysella eonomus                                                                                                                                                                                                                                                                                                                                                                                                                                                                                                                                                                                              | reproduct meat sport recreat season opportunit edible consumpt eaten riparia n buffer vegetat extrapolat strap entrap strap sediment.*trap contam.*trap po llut.*trap trap.*contam trap.*pollut nutrient.*trap trap.*nutrient sand.*trap tra p.*sand trap.*sediment litter trap fish trap trap.*site shunt huntley huntington hunterdon workshop saalem mysella e conomus newmarket productivity |
| Beneficiary | Government and Mu   | Government and Mu    | include   | our communit sustainable communit local communit waterfront communit community plan town city neighborhood community outreach community education                                                                                                                                                                                                                                                                                                                                                                                                                                                                                                                                                              | resident families children citizen family living                                                                                                                                                                                                                                                                                                                                                 |
| Beneficiary | Government and Mu   | Government and Mu    | near      |                                                                                                                                                                                                                                                                                                                                                                                                                                                                                                                                                                                                                                                                                                                |                                                                                                                                                                                                                                                                                                                                                                                                  |
| Beneficiary | Government and Mu   | Government and Mu    | exclude   | presidential biological.*communit benthic.*communit ocean.*city residential.*la nd habitat.*community natural.*communities resident.*shorebird coral.*commu nit capacity plant.*communit communit.*plant ecologic.*communit vegetat.*co mmunit animal.*communit bottom.*communit biotic.*communit estuarine.*co mmunit oyster.*communit communit.*type meadow.*communit tidal.*communi owner private.*land private.*property landowner land t communit.*native native.*communt communit.*fish fish.*communit wildlife.*c owner president acqui restor purchase buy resident.*species resident.*wildlife  ommunit resident.*pod population.*resident reef.*communit forest.*communit  marine.*communit capacity | resident.*develop develop.*resident homeowner home owner private.*land private.*property landowner land owner president acqui restor purchase buy resident.*species resident.*wildlife  resident.*animal property.*tax tax.*property tax.*resident resident.*tax develo ping.*recommendation                                                                                                     |
| Beneficiary | Government and Mu   | Municipal Drinking V | include   | municipal well public well                                                                                                                                                                                                                                                                                                                                                                                                                                                                                                                                                                                                                                                                                     | desal plant desalination                                                                                                                                                                                                                                                                                                                                                                         |
| Beneficiary | Government and Mu   | Municipal Drinking V | exclude   |                                                                                                                                                                                                                                                                                                                                                                                                                                                                                                                                                                                                                                                                                                                |                                                                                                                                                                                                                                                                                                                                                                                                  |
| Beneficiary | Government and Mu   | Wastewater Treatme   | include   |                                                                                                                                                                                                                                                                                                                                                                                                                                                                                                                                                                                                                                                                                                                |                                                                                                                                                                                                                                                                                                                                                                                                  |
| Beneficiary | Government and Mu   | Wastewater Treatme   | exclude   |                                                                                                                                                                                                                                                                                                                                                                                                                                                                                                                                                                                                                                                                                                                |                                                                                                                                                                                                                                                                                                                                                                                                  |
| Beneficiary | Government and Mu   | Residential Property | include   | homes homeowner housing home-owner home owner                                                                                                                                                                                                                                                                                                                                                                                                                                                                                                                                                                                                                                                                  | residents residential private well domestic well                                                                                                                                                                                                                                                                                                                                                 |
| Beneficiary | Government and Mu   | Residential Property | near      |                                                                                                                                                                                                                                                                                                                                                                                                                                                                                                                                                                                                                                                                                                                |                                                                                                                                                                                                                                                                                                                                                                                                  |
| Beneficiary | Government and Mu   | Residential Property | exclude   | visitor housing housing a  housing the                                                                                                                                                                                                                                                                                                                                                                                                                                                                                                                                                                                                                                                                         |                                                                                                                                                                                                                                                                                                                                                                                                  |
| Beneficiary | Government and Mu   | Military_Coast Guard | include   |                                                                                                                                                                                                                                                                                                                                                                                                                                                                                                                                                                                                                                                                                                                |                                                                                                                                                                                                                                                                                                                                                                                                  |
| Beneficiary | Government and Mu   | Military_Coast Guard | exclude   |                                                                                                                                                                                                                                                                                                                                                                                                                                                                                                                                                                                                                                                                                                                |                                                                                                                                                                                                                                                                                                                                                                                                  |
| Beneficiary | Commercial_Military | Commercial_Military  | include   | ship vessel air rail pilot captain navigation train navigability                                                                                                                                                                                                                                                                                                                                                                                                                                                                                                                                                                                                                                               | highway interstate road transport.*infrastruct infrastruct.*transport                                                                                                                                                                                                                                                                                                                            |
| Beneficiary | Commercial_Military | Commercial_Military  | near      | transport commercial                                                                                                                                                                                                                                                                                                                                                                                                                                                                                                                                                                                                                                                                                           | develop alter construct site siting abandon assess remov need build                                                                                                                                                                                                                                                                                                                              |
| Beneficiary | Commercial_Military | Commercial_Military  | exclude   | relationship rship nship urship sediment.*transport transport.*sediment conta m.*transport transport.*contam nutrient.*transport transport.*nutrient cargo g oods shipping freight commodit container people commut trail pair fair air yam air plant chair questionnaire airborne affair millionaire dairy airshed National.*We ather.*Service impair repair belleair air.*act prair clean.*air.*act national.*air.*s tandard regulat.*air lair Air Resource Specialist Clean Air Bond dair www Air Resources Lab air rifle air condition airboat stair nair bair fair air yam air plant air temp hair                                                                                                        | broad nroad roadbl sediment.*transport transport.*sediment contam.*transport  transport.*contam nutrient.*transport transport.*nutrient                                                                                                                                                                                                                                                          |
| Beneficiary | Commercial_Military | Transporters of Good | include   | port                                                                                                                                                                                                                                                                                                                                                                                                                                                                                                                                                                                                                                                                                                           | vessel barge gundalow                                                                                                                                                                                                                                                                                                                                                                            |
| Beneficiary | Commercial_Military | Transporters of Good | near      | cargo goods shipping freight commodit container                                                                                                                                                                                                                                                                                                                                                                                                                                                                                                                                                                                                                                                                | cargo goods shipping freight commodit container                                                                                                                                                                                                                                                                                                                                                  |

| Category    | Class               | SubClass             | Word_type | S4                                                                                                                               | S5                                              |
|-------------|---------------------|----------------------|-----------|----------------------------------------------------------------------------------------------------------------------------------|-------------------------------------------------|
| Beneficiary | Commerical_Industri | Resource-Dependent   | exclude   |                                                                                                                                  |                                                 |
| Beneficiary | Commerical_Industri | Pharmaceutical and   | include   |                                                                                                                                  |                                                 |
| Beneficiary | Commerical_Industri | Pharmaceutical and   | I near    |                                                                                                                                  |                                                 |
| Beneficiary | Commerical_Industri | Pharmaceutical and   | I exclude |                                                                                                                                  |                                                 |
| Beneficiary | Commerical_Industri | Fur_Hide Trappers a  | include   |                                                                                                                                  |                                                 |
| Beneficiary | Commerical_Industri | Fur_Hide Trappers a  | I near    |                                                                                                                                  |                                                 |
| Beneficiary | Commerical_Industri | Fur_Hide Trappers a  | I exclude |                                                                                                                                  |                                                 |
| Beneficiary | Government and Mu   | Government and Mu    | include   | hazard natural<br>disaster aquifer development.*pattern pattern.*development coastal<br>development sprawl                       | open space                                      |
| Beneficiary | Government and Mu   | Government and Mu    | near      |                                                                                                                                  |                                                 |
| Beneficiary | Government and Mu   | Government and Mu    | exclude   | hazardous                                                                                                                        |                                                 |
| Beneficiary | Government and Mu   | Municipal Drinking V | include   | municipal.*water water.*municipal<br>watershed wastewater permit division.*water waterway waterbod municipal<br>park municipalit |                                                 |
| Beneficiary | Government and Mu   | Municipal Drinking V | exclude   |                                                                                                                                  |                                                 |
| Beneficiary | Government and Mu   | Wastewater Treatme   | include   |                                                                                                                                  |                                                 |
| Beneficiary | Government and Mu   | Wastewater Treatme   | exclude   |                                                                                                                                  |                                                 |
| Beneficiary | Government and Mu   | Residential Property | include   |                                                                                                                                  |                                                 |
| Beneficiary | Government and Mu   | Residential Property | near      |                                                                                                                                  |                                                 |
| Beneficiary | Government and Mu   | Residential Property | exclude   |                                                                                                                                  |                                                 |
| Beneficiary | Government and Mu   | Military_Coast Guard | include   |                                                                                                                                  |                                                 |
| Beneficiary | Government and Mu   | Military_Coast Guard | exclude   |                                                                                                                                  |                                                 |
| Beneficiary | Commercial_Military | Commercial_Military  | include   | navigable navigat                                                                                                                |                                                 |
| Beneficiary | Commercial_Military | Commercial_Military  | near      |                                                                                                                                  |                                                 |
| Beneficiary | Commercial_Military | Commercial_Military  | exclude   |                                                                                                                                  |                                                 |
| Beneficiary | Commercial_Military | Transporters of Good | include   | train railroad railway                                                                                                           | rail air transport                              |
| Beneficiary | Commercial_Military | Transporters of Good | near      | cargo goods shipping freight commodit container                                                                                  | cargo goods shipping freight commodit container |

| Category    | Class               | SubClass             | Word_type | S6                                                                                                                                                                                                                                                                                                                                                                                                                                                                                                                                                         | S7                                                                                                                              |
|-------------|---------------------|----------------------|-----------|------------------------------------------------------------------------------------------------------------------------------------------------------------------------------------------------------------------------------------------------------------------------------------------------------------------------------------------------------------------------------------------------------------------------------------------------------------------------------------------------------------------------------------------------------------|---------------------------------------------------------------------------------------------------------------------------------|
| Beneficiary | Commerical_Industri | Resource-Dependent   | exclude   |                                                                                                                                                                                                                                                                                                                                                                                                                                                                                                                                                            | workshop productivity reproduct salem mysella economus                                                                          |
| Beneficiary | Commerical_Industri | Pharmaceutical and   | include   |                                                                                                                                                                                                                                                                                                                                                                                                                                                                                                                                                            |                                                                                                                                 |
| Beneficiary | Commerical_Industri | Pharmaceutical and   | I near    |                                                                                                                                                                                                                                                                                                                                                                                                                                                                                                                                                            |                                                                                                                                 |
| Beneficiary | Commerical_Industri | Pharmaceutical and   | I exclude |                                                                                                                                                                                                                                                                                                                                                                                                                                                                                                                                                            |                                                                                                                                 |
| Beneficiary | Commerical_Industri | Fur_Hide Trappers a  | include   |                                                                                                                                                                                                                                                                                                                                                                                                                                                                                                                                                            |                                                                                                                                 |
| Beneficiary | Commerical_Industri | Fur_Hide Trappers a  | I near    |                                                                                                                                                                                                                                                                                                                                                                                                                                                                                                                                                            |                                                                                                                                 |
| Beneficiary | Commerical_Industri | Fur_Hide Trappers a  | I exclude |                                                                                                                                                                                                                                                                                                                                                                                                                                                                                                                                                            |                                                                                                                                 |
| Beneficiary | Government and Mu   | Government and Mu    | include   | watershed  area region community communities country state                                                                                                                                                                                                                                                                                                                                                                                                                                                                                                 | our region our country our county our state our area our watershed the people of all the people all of the people of the people |
| Beneficiary | Government and Mu   | Government and Mu    | I near    | habitant resident occupant living in live in                                                                                                                                                                                                                                                                                                                                                                                                                                                                                                               |                                                                                                                                 |
| Beneficiary | Government and Mu   | Government and Mu    | exclude   | presidential biological.*communit benthic.*communit ocean.*city residential.*land habitat.*community natural.*communities resident.*shorebird coral.*communit capacity plant.*communit communit.*plant ecologic.*communit vegetat.*communit animal.*communit bottom.*communit biotic.*communit estuarine.*communit oyster.*communit communit.*type meadow.*communit tidal.*communit communit.*native native.*communit communit.*fish fish.*communit wildlife.*communit resident.*pod population.*resident reef.*communit forest.*communit marine.*communit |                                                                                                                                 |
| Beneficiary | Government and Mu   | Municipal Drinking V | include   |                                                                                                                                                                                                                                                                                                                                                                                                                                                                                                                                                            |                                                                                                                                 |
| Beneficiary | Government and Mu   | Municipal Drinking V | exclude   |                                                                                                                                                                                                                                                                                                                                                                                                                                                                                                                                                            |                                                                                                                                 |
| Beneficiary | Government and Mu   | Wastewater Treatme   | include   |                                                                                                                                                                                                                                                                                                                                                                                                                                                                                                                                                            |                                                                                                                                 |
| Beneficiary | Government and Mu   | Wastewater Treatme   | exclude   |                                                                                                                                                                                                                                                                                                                                                                                                                                                                                                                                                            |                                                                                                                                 |
| Beneficiary | Government and Mu   | Residential Property | include   |                                                                                                                                                                                                                                                                                                                                                                                                                                                                                                                                                            |                                                                                                                                 |
| Beneficiary | Government and Mu   | Residential Property | I near    |                                                                                                                                                                                                                                                                                                                                                                                                                                                                                                                                                            |                                                                                                                                 |
| Beneficiary | Government and Mu   | Residential Property | I exclude |                                                                                                                                                                                                                                                                                                                                                                                                                                                                                                                                                            |                                                                                                                                 |
| Beneficiary | Government and Mu   | Military_Coast Guard | include   |                                                                                                                                                                                                                                                                                                                                                                                                                                                                                                                                                            |                                                                                                                                 |
| Beneficiary | Government and Mu   | Military_Coast Guard | exclude   |                                                                                                                                                                                                                                                                                                                                                                                                                                                                                                                                                            |                                                                                                                                 |
| Beneficiary | Commercial_Military | Commercial_Military  | include   |                                                                                                                                                                                                                                                                                                                                                                                                                                                                                                                                                            |                                                                                                                                 |
| Beneficiary | Commercial_Military | Commercial_Military  | I near    |                                                                                                                                                                                                                                                                                                                                                                                                                                                                                                                                                            |                                                                                                                                 |
| Beneficiary | Commercial_Military | Commercial_Military  | exclude   |                                                                                                                                                                                                                                                                                                                                                                                                                                                                                                                                                            |                                                                                                                                 |
| Beneficiary | Commercial_Military | Transporters of Good | include   |                                                                                                                                                                                                                                                                                                                                                                                                                                                                                                                                                            |                                                                                                                                 |
| Beneficiary | Commercial_Military | Transporters of Good | I near    |                                                                                                                                                                                                                                                                                                                                                                                                                                                                                                                                                            |                                                                                                                                 |

| Category    | Class               | SubClass             | Word_type | S8                                                                                                                      | S9                                                       |
|-------------|---------------------|----------------------|-----------|-------------------------------------------------------------------------------------------------------------------------|----------------------------------------------------------|
| Beneficiary | Commerical_Industri | Resource-Dependent   | exclude   |                                                                                                                         |                                                          |
| Beneficiary | Commerical_Industri | Pharmaceutical and   | include   |                                                                                                                         |                                                          |
| Beneficiary | Commerical_Industri | Pharmaceutical and   | I near    |                                                                                                                         |                                                          |
| Beneficiary | Commerical_Industri | Pharmaceutical and   | I exclude |                                                                                                                         |                                                          |
| Beneficiary | Commerical_Industri | Fur_Hide Trappers a  | include   |                                                                                                                         |                                                          |
| Beneficiary | Commerical_Industri | Fur_Hide Trappers a  | I near    |                                                                                                                         |                                                          |
| Beneficiary | Commerical_Industri | Fur_Hide Trappers a  | I exclude |                                                                                                                         |                                                          |
| Beneficiary | Government and Mu   | Government and Mu    | include   | quality of life   public health   human health   wellbeing   well being   well-being   general health   general welfare | safe                                                     |
| Beneficiary | Government and Mu   | Government and Mu    | near      | habitant   resident   occupant   living in   live in                                                                    | habitant   resident   occupant   living in   live in     |
| Beneficiary | Government and Mu   | Government and Mu    | exclude   | department of public health   public health department                                                                  | boat   safeguard   pilot   harbor   port   vessel   ship |
| Beneficiary | Government and Mu   | Municipal Drinking V | include   |                                                                                                                         |                                                          |
| Beneficiary | Government and Mu   | Municipal Drinking V | exclude   |                                                                                                                         |                                                          |
| Beneficiary | Government and Mu   | Wastewater Treatme   | include   |                                                                                                                         |                                                          |
| Beneficiary | Government and Mu   | Wastewater Treatme   | exclude   |                                                                                                                         |                                                          |
| Beneficiary | Government and Mu   | Residential Property | include   |                                                                                                                         |                                                          |
| Beneficiary | Government and Mu   | Residential Property | near      |                                                                                                                         |                                                          |
| Beneficiary | Government and Mu   | Residential Property | exclude   |                                                                                                                         |                                                          |
| Beneficiary | Government and Mu   | Military_Coast Guard | include   |                                                                                                                         |                                                          |
| Beneficiary | Government and Mu   | Military_Coast Guard | exclude   |                                                                                                                         |                                                          |
| Beneficiary | Commercial_Military | Commercial_Military  | include   |                                                                                                                         |                                                          |
| Beneficiary | Commercial_Military | Commercial_Military  | near      |                                                                                                                         |                                                          |
| Beneficiary | Commercial_Military | Commercial_Military  | exclude   |                                                                                                                         |                                                          |
| Beneficiary | Commercial_Military | Transporters of Good | include   |                                                                                                                         |                                                          |
| Beneficiary | Commercial_Military | Transporters of Good | near      |                                                                                                                         |                                                          |

| Category    | Class               | SubClass             | Word_type | S10 | S11 |
|-------------|---------------------|----------------------|-----------|-----|-----|
| Beneficiary | Commerical_Industri | Resource-Dependent   | exclude   |     |     |
| Beneficiary | Commerical_Industri | Pharmaceutical and   | include   |     |     |
| Beneficiary | Commerical_Industri | Pharmaceutical and   | I near    |     |     |
| Beneficiary | Commerical_Industri | Pharmaceutical and   | I exclude |     |     |
| Beneficiary | Commerical_Industri | Fur_Hide Trappers a  | include   |     |     |
| Beneficiary | Commerical_Industri | Fur_Hide Trappers a  | I near    |     |     |
| Beneficiary | Commerical_Industri | Fur_Hide Trappers a  | I exclude |     |     |
| Beneficiary | Government and Mu   | Government and Mu    | include   |     |     |
| Beneficiary | Government and Mu   | Government and Mu    | I near    |     |     |
| Beneficiary | Government and Mu   | Government and Mu    | I exclude |     |     |
| Beneficiary | Government and Mu   | Municipal Drinking V | include   |     |     |
| Beneficiary | Government and Mu   | Municipal Drinking V | I exclude |     |     |
| Beneficiary | Government and Mu   | Wastewater Treatme   | include   |     |     |
| Beneficiary | Government and Mu   | Wastewater Treatme   | I exclude |     |     |
| Beneficiary | Government and Mu   | Residential Property | include   |     |     |
| Beneficiary | Government and Mu   | Residential Property | I near    |     |     |
| Beneficiary | Government and Mu   | Residential Property | I exclude |     |     |
| Beneficiary | Government and Mu   | Military_Coast Guard | include   |     |     |
| Beneficiary | Government and Mu   | Military_Coast Guard | I exclude |     |     |
| Beneficiary | Commercial_Military | Commercial_Military  | include   |     |     |
| Beneficiary | Commercial_Military | Commercial_Military  | I near    |     |     |
| Beneficiary | Commercial_Military | Commercial_Military  | I exclude |     |     |
| Beneficiary | Commercial_Military | Transporters of Good | include   |     |     |
| Beneficiary | Commercial_Military | Transporters of Good | I near    |     |     |

| Category    | Class               | SubClass             | Word_type | S12 | S13 |
|-------------|---------------------|----------------------|-----------|-----|-----|
| Beneficiary | Commerical_Industri | Resource-Dependent   | exclude   |     |     |
| Beneficiary | Commerical_Industri | Pharmaceutical and   | include   |     |     |
| Beneficiary | Commerical_Industri | Pharmaceutical and   | I near    |     |     |
| Beneficiary | Commerical_Industri | Pharmaceutical and   | I exclude |     |     |
| Beneficiary | Commerical_Industri | Fur_Hide Trappers a  | include   |     |     |
| Beneficiary | Commerical_Industri | Fur_Hide Trappers a  | I near    |     |     |
| Beneficiary | Commerical_Industri | Fur_Hide Trappers a  | I exclude |     |     |
| Beneficiary | Government and Mu   | Government and Mu    | include   |     |     |
| Beneficiary | Government and Mu   | Government and Mu    | I near    |     |     |
| Beneficiary | Government and Mu   | Government and Mu    | I exclude |     |     |
| Beneficiary | Government and Mu   | Municipal Drinking V | include   |     |     |
| Beneficiary | Government and Mu   | Municipal Drinking V | I exclude |     |     |
| Beneficiary | Government and Mu   | Wastewater Treatme   | include   |     |     |
| Beneficiary | Government and Mu   | Wastewater Treatme   | I exclude |     |     |
| Beneficiary | Government and Mu   | Residential Property | include   |     |     |
| Beneficiary | Government and Mu   | Residential Property | I near    |     |     |
| Beneficiary | Government and Mu   | Residential Property | I exclude |     |     |
| Beneficiary | Government and Mu   | Military_Coast Guard | include   |     |     |
| Beneficiary | Government and Mu   | Military_Coast Guard | I exclude |     |     |
| Beneficiary | Commercial_Military | Commercial_Military  | include   |     |     |
| Beneficiary | Commercial_Military | Commercial_Military  | I near    |     |     |
| Beneficiary | Commercial_Military | Commercial_Military  | I exclude |     |     |
| Beneficiary | Commercial_Military | Transporters of Good | include   |     |     |
| Beneficiary | Commercial_Military | Transporters of Good | I near    |     |     |

| Category    | Class               | SubClass               | Word_type | S1                                                                                                                                                                                                                                                                                                                   |
|-------------|---------------------|------------------------|-----------|----------------------------------------------------------------------------------------------------------------------------------------------------------------------------------------------------------------------------------------------------------------------------------------------------------------------|
| Beneficiary | Commercial_Military | Transporters of Goods  | exclude   |                                                                                                                                                                                                                                                                                                                      |
| Beneficiary | Commercial_Military | Transporters of People | include   | people.*transport transport.*people                                                                                                                                                                                                                                                                                  |
| Beneficiary | Commercial_Military | Transporters of People | near      |                                                                                                                                                                                                                                                                                                                      |
| Beneficiary | Commercial_Military | Transporters of People | exclude   | sediment.*transport transport.*sediment contam.*transport transport.*contam nutrient.*transport transport.*nutrient                                                                                                                                                                                                  |
| Beneficiary | Subsistence         | Subsistence            | include   | subsistence                                                                                                                                                                                                                                                                                                          |
| Beneficiary | Subsistence         | Subsistence            | near      |                                                                                                                                                                                                                                                                                                                      |
| Beneficiary | Subsistence         | Subsistence            | exclude   |                                                                                                                                                                                                                                                                                                                      |
| Beneficiary | Subsistence         | Water Subsisters       | include   | cistern rain.*barrel                                                                                                                                                                                                                                                                                                 |
| Beneficiary | Subsistence         | Water Subsisters       | near      |                                                                                                                                                                                                                                                                                                                      |
| Beneficiary | Subsistence         | Water Subsisters       | exclude   | drain train brain grain                                                                                                                                                                                                                                                                                              |
| Beneficiary | Subsistence         | Food Subsisters        | include   | food hunt gatherer gathering harvest                                                                                                                                                                                                                                                                                 |
| Beneficiary | Subsistence         | Food Subsisters        | near      | subsist tribal tribe indigenous.*people indian population indian people indigenous.*cultur native.*person native american traditional use traditional sustainable use sustenance                                                                                                                                     |
| Beneficiary | Subsistence         | Food Subsisters        | exclude   | web chain food.*species flock shelter data food waste food bag                                                                                                                                                                                                                                                       |
| Beneficiary | Subsistence         | Timber and Fiber and   | include   | skin hide  fur   furs  fur-bear fur bear furbear pelt tanning feather                                                                                                                                                                                                                                                |
| Beneficiary | Subsistence         | Timber and Fiber and   | near      | subsist tribal tribe indigenous.*people indian population indian people indigenous.*cultur indigenous.*people indian population indian people native.*person native american traditional use traditional sustainable use sustenance traditional way depend on the land dependent on the land dependent upon the land |

| Category    | Class               | SubClass               | Word_type | S2                                                                                                                                                                                                                                                                                                                                                                                                                       | S3                                                                                                                                                                                                                                                                                                                                                   |
|-------------|---------------------|------------------------|-----------|--------------------------------------------------------------------------------------------------------------------------------------------------------------------------------------------------------------------------------------------------------------------------------------------------------------------------------------------------------------------------------------------------------------------------|------------------------------------------------------------------------------------------------------------------------------------------------------------------------------------------------------------------------------------------------------------------------------------------------------------------------------------------------------|
| Beneficiary | Commercial_Military | Transporters of Goods  | exclude   | transport support report opportunit import portion sport portuguese airport portray export porta puport portugal disproportion westport port.*native purpose cockroach susan port.*of                                                                                                                                                                                                                                    |                                                                                                                                                                                                                                                                                                                                                      |
| Beneficiary | Commercial_Military | Transporters of People | include   | cruise ferry ferries airplane airport airstrip air.*runway runway.*air airfield                                                                                                                                                                                                                                                                                                                                          | train railroad railway gundalow                                                                                                                                                                                                                                                                                                                      |
| Beneficiary | Commercial_Military | Transporters of People | near      |                                                                                                                                                                                                                                                                                                                                                                                                                          | commut people travel passenger                                                                                                                                                                                                                                                                                                                       |
| Beneficiary | Commercial_Military | Transporters of People | exclude   |                                                                                                                                                                                                                                                                                                                                                                                                                          | training trained constrain entrain strain train.*about train people                                                                                                                                                                                                                                                                                  |
| Beneficiary | Subsistence         | Subsistence            | include   | subsist tribal tribe indigenous.*people indian population indian people indian population indian people indigenous.*people indian population indian people indian population indian people native.*person native american traditional use traditional sustainable use sustenance traditional way depend on the land dependent on the land dependent upon the land traditional knowledge traditional ecological knowledge | traditional use traditional sustainable use traditional way                                                                                                                                                                                                                                                                                          |
| Beneficiary | Subsistence         | Subsistence            | near      | resource use survive                                                                                                                                                                                                                                                                                                                                                                                                     |                                                                                                                                                                                                                                                                                                                                                      |
| Beneficiary | Subsistence         | Subsistence            | exclude   | because horticultur agricultur alternativ aqua.*cultur monocultur non-nativ independent interdependent                                                                                                                                                                                                                                                                                                                   |                                                                                                                                                                                                                                                                                                                                                      |
| Beneficiary | Subsistence         | Water Subsisters       | include   | water                                                                                                                                                                                                                                                                                                                                                                                                                    | store.*rain rain.*store storage.*rain rain.*storage collect.*rain rain.*collect collect.*rain rain.*collect                                                                                                                                                                                                                                          |
| Beneficiary | Subsistence         | Water Subsisters       | near      | subsistence tribal tribe indigenous.*people indian population indian people indigenous.*cultur indigenous.*people indian population indian people native cultur native person native american native village traditional use traditional sustainable use sustenance traditional way depend on the land dependent on the land dependent upon the land                                                                     | later use reuse re-use drink irrigat water.*lawn water.*grass water.*yard                                                                                                                                                                                                                                                                            |
| Beneficiary | Subsistence         | Water Subsisters       | exclude   | horticultur agricultur alternativ aqua.*cultur monocultur non-nativ independent interdependent waterfront waterfowl watershed                                                                                                                                                                                                                                                                                            | restor drain train brain grain rainbow grass pickerel                                                                                                                                                                                                                                                                                                |
| Beneficiary | Subsistence         | Food Subsisters        | include   | food berries berry mushroom fruit vegetabl herb shellfish clam mussel rice hunting fish shrimp salmon oyster pike crab lobster mullet mussel bass herring grouper snapper alewife flounder abalone scallop clam duck turkey deer waterfowl quail honey                                                                                                                                                                   |                                                                                                                                                                                                                                                                                                                                                      |
| Beneficiary | Subsistence         | Food Subsisters        | near      | subsistence tribal tribe indigenous.*people indian population indian people indigenous.*cultur indigenous.*people indian population indian people native cultur native person native american native village traditional use traditional sustainable use sustenance traditional way depend on the land dependent on the land dependent upon the land                                                                     |                                                                                                                                                                                                                                                                                                                                                      |
| Beneficiary | Subsistence         | Food Subsisters        | exclude   | horticultur agricultur alternativ aqua.*cultur monocultur non-nativ ambassador salmon falls independent interdependent duck farm clam oyster creek                                                                                                                                                                                                                                                                       |                                                                                                                                                                                                                                                                                                                                                      |
| Beneficiary | Subsistence         | Timber and Fiber and   | include   | nutria beaver deer alligator hogs rabbit                                                                                                                                                                                                                                                                                                                                                                                 | timber fiber wood pulp pine oak cypress elm ash maple hickory hardwood cedar cordwood reed grass salt hay salt marsh hay turpentine                                                                                                                                                                                                                  |
| Beneficiary | Subsistence         | Timber and Fiber and   | near      | subsistence tribal tribe indigenous.*people indian population indian people indigenous.*cultur indigenous.*people indian population indian people native cultur native person native american native village traditional use traditional sustainable use sustenance traditional way depend on the land dependent on the land dependent upon the land                                                                     | subsistence tribal tribe indigenous.*people indian population indian people indigenous.*cultur indigenous.*people indian population indian people native cultur native person native american native village traditional use traditional sustainable use sustenance traditional way depend on the land dependent on the land dependent upon the land |

| Category    | Class               | SubClass               | Word_type | S4                                                                                            | S5                                                                                                                                                                                                                                                                                                                                                                                                                                                                                               |
|-------------|---------------------|------------------------|-----------|-----------------------------------------------------------------------------------------------|--------------------------------------------------------------------------------------------------------------------------------------------------------------------------------------------------------------------------------------------------------------------------------------------------------------------------------------------------------------------------------------------------------------------------------------------------------------------------------------------------|
| Beneficiary | Commercial_Military | Transporters of Goods  | exclude   | training trained constrain entrain strain train.*about                                        | train pair fair air yam air plant chair questionnaire airborne affair millionaire dairy airshed National.*Weather.*Service impair repair belleair air.*act prair clean.*air.*act national.*standard regulat.*air lair Air Resource Specialist Clean Air Bond dair www Air Resources Lab air rifle air condition airboat stair nair bair fair air yam air plant air temp hair sediment.*transport transport.*sediment contam.*transport transport.*contam nutrient.*transport transport.*nutrient |
| Beneficiary | Commercial_Military | Transporters of People | include   | rail.*transportation transportation.*rail                                                     | parking                                                                                                                                                                                                                                                                                                                                                                                                                                                                                          |
| Beneficiary | Commercial_Military | Transporters of People | near      | commut people travel passenger                                                                | area lot                                                                                                                                                                                                                                                                                                                                                                                                                                                                                         |
| Beneficiary | Commercial_Military | Transporters of People | exclude   | trail                                                                                         |                                                                                                                                                                                                                                                                                                                                                                                                                                                                                                  |
| Beneficiary | Subsistence         | Subsistence            | include   | depend on the land dependent on the land dependent upon the land                              |                                                                                                                                                                                                                                                                                                                                                                                                                                                                                                  |
| Beneficiary | Subsistence         | Subsistence            | near      |                                                                                               |                                                                                                                                                                                                                                                                                                                                                                                                                                                                                                  |
| Beneficiary | Subsistence         | Subsistence            | exclude   |                                                                                               |                                                                                                                                                                                                                                                                                                                                                                                                                                                                                                  |
| Beneficiary | Subsistence         | Water Subsisters       | include   | water well supply well domestic well private well artesian well shallow well groundwater well |                                                                                                                                                                                                                                                                                                                                                                                                                                                                                                  |
| Beneficiary | Subsistence         | Water Subsisters       | near      | swells wells reserve wells bay town of wells                                                  |                                                                                                                                                                                                                                                                                                                                                                                                                                                                                                  |
| Beneficiary | Subsistence         | Water Subsisters       | exclude   |                                                                                               |                                                                                                                                                                                                                                                                                                                                                                                                                                                                                                  |
| Beneficiary | Subsistence         | Food Subsisters        | include   |                                                                                               |                                                                                                                                                                                                                                                                                                                                                                                                                                                                                                  |
| Beneficiary | Subsistence         | Food Subsisters        | near      |                                                                                               |                                                                                                                                                                                                                                                                                                                                                                                                                                                                                                  |
| Beneficiary | Subsistence         | Food Subsisters        | exclude   |                                                                                               |                                                                                                                                                                                                                                                                                                                                                                                                                                                                                                  |
| Beneficiary | Subsistence         | Timber and Fiber and   | include   | firewood campfire                                                                             |                                                                                                                                                                                                                                                                                                                                                                                                                                                                                                  |
| Beneficiary | Subsistence         | Timber and Fiber and   | near      |                                                                                               |                                                                                                                                                                                                                                                                                                                                                                                                                                                                                                  |

| Category    | Class               | SubClass               | Word_type | S6 | S7 |
|-------------|---------------------|------------------------|-----------|----|----|
|             |                     |                        |           |    |    |
| Beneficiary | Commercial_Military | Transporters of Good   | exclude   |    |    |
| Beneficiary | Commercial_Military | Transporters of People | include   |    |    |
| Beneficiary | Commercial_Military | Transporters of People | near      |    |    |
| Beneficiary | Commercial_Military | Transporters of People | exclude   |    |    |
|             |                     |                        |           |    |    |
| Beneficiary | Subsistence         | Subsistence            | include   |    |    |
| Beneficiary | Subsistence         | Subsistence            | near      |    |    |
| Beneficiary | Subsistence         | Subsistence            | exclude   |    |    |
| Beneficiary | Subsistence         | Water Subsistence      | include   |    |    |
|             |                     |                        |           |    |    |
| Beneficiary | Subsistence         | Water Subsistence      | near      |    |    |
| Beneficiary | Subsistence         | Water Subsistence      | exclude   |    |    |
| Beneficiary | Subsistence         | Food Subsistence       | include   |    |    |
|             |                     |                        |           |    |    |
| Beneficiary | Subsistence         | Food Subsistence       | near      |    |    |
| Beneficiary | Subsistence         | Food Subsistence       | exclude   |    |    |
| Beneficiary | Subsistence         | Timber and Fiber and   | include   |    |    |
|             |                     |                        |           |    |    |
| Beneficiary | Subsistence         | Timber and Fiber and   | near      |    |    |

| Category    | Class               | SubClass               | Word_type | S8 | S9 |
|-------------|---------------------|------------------------|-----------|----|----|
|             |                     |                        |           |    |    |
| Beneficiary | Commercial_Military | Transporters of Good   | exclude   |    |    |
| Beneficiary | Commercial_Military | Transporters of People | include   |    |    |
| Beneficiary | Commercial_Military | Transporters of People | near      |    |    |
| Beneficiary | Commercial_Military | Transporters of People | exclude   |    |    |
|             |                     |                        |           |    |    |
| Beneficiary | Subsistence         | Subsistence            | include   |    |    |
| Beneficiary | Subsistence         | Subsistence            | near      |    |    |
| Beneficiary | Subsistence         | Subsistence            | exclude   |    |    |
| Beneficiary | Subsistence         | Water Subsistence      | include   |    |    |
|             |                     |                        |           |    |    |
| Beneficiary | Subsistence         | Water Subsistence      | near      |    |    |
| Beneficiary | Subsistence         | Water Subsistence      | exclude   |    |    |
| Beneficiary | Subsistence         | Food Subsistence       | include   |    |    |
|             |                     |                        |           |    |    |
| Beneficiary | Subsistence         | Food Subsistence       | near      |    |    |
| Beneficiary | Subsistence         | Food Subsistence       | exclude   |    |    |
| Beneficiary | Subsistence         | Timber and Fiber and   | include   |    |    |
|             |                     |                        |           |    |    |
| Beneficiary | Subsistence         | Timber and Fiber and   | near      |    |    |

| Category    | Class               | SubClass               | Word_type | S10 | S11 |
|-------------|---------------------|------------------------|-----------|-----|-----|
|             |                     |                        |           |     |     |
| Beneficiary | Commercial_Military | Transporters of Good   | exclude   |     |     |
| Beneficiary | Commercial_Military | Transporters of People | include   |     |     |
| Beneficiary | Commercial_Military | Transporters of People | near      |     |     |
| Beneficiary | Commercial_Military | Transporters of People | exclude   |     |     |
|             |                     |                        |           |     |     |
| Beneficiary | Subsistence         | Subsistence            | include   |     |     |
| Beneficiary | Subsistence         | Subsistence            | near      |     |     |
| Beneficiary | Subsistence         | Subsistence            | exclude   |     |     |
| Beneficiary | Subsistence         | Water Subsistence      | include   |     |     |
|             |                     |                        |           |     |     |
| Beneficiary | Subsistence         | Water Subsistence      | near      |     |     |
| Beneficiary | Subsistence         | Water Subsistence      | exclude   |     |     |
| Beneficiary | Subsistence         | Food Subsistence       | include   |     |     |
|             |                     |                        |           |     |     |
| Beneficiary | Subsistence         | Food Subsistence       | near      |     |     |
| Beneficiary | Subsistence         | Food Subsistence       | exclude   |     |     |
| Beneficiary | Subsistence         | Timber and Fiber and   | include   |     |     |
|             |                     |                        |           |     |     |
| Beneficiary | Subsistence         | Timber and Fiber and   | near      |     |     |

| Category    | Class               | SubClass               | Word_type | S12 | S13 |
|-------------|---------------------|------------------------|-----------|-----|-----|
|             |                     |                        |           |     |     |
| Beneficiary | Commercial_Military | Transporters of Good   | exclude   |     |     |
| Beneficiary | Commercial_Military | Transporters of People | include   |     |     |
| Beneficiary | Commercial_Military | Transporters of People | near      |     |     |
| Beneficiary | Commercial_Military | Transporters of People | exclude   |     |     |
|             |                     |                        |           |     |     |
| Beneficiary | Subsistence         | Subsistence            | include   |     |     |
| Beneficiary | Subsistence         | Subsistence            | near      |     |     |
| Beneficiary | Subsistence         | Subsistence            | exclude   |     |     |
| Beneficiary | Subsistence         | Water Subsistence      | include   |     |     |
|             |                     |                        |           |     |     |
| Beneficiary | Subsistence         | Water Subsistence      | near      |     |     |
| Beneficiary | Subsistence         | Water Subsistence      | exclude   |     |     |
| Beneficiary | Subsistence         | Food Subsistence       | include   |     |     |
|             |                     |                        |           |     |     |
| Beneficiary | Subsistence         | Food Subsistence       | near      |     |     |
| Beneficiary | Subsistence         | Food Subsistence       | exclude   |     |     |
| Beneficiary | Subsistence         | Timber and Fiber and   | include   |     |     |
|             |                     |                        |           |     |     |
| Beneficiary | Subsistence         | Timber and Fiber and   | near      |     |     |

| Category    | Class        | SubClass              | Word_type | S1                                                                                                                                                                                                                                                                                                                                                                                                                                                                                                                                                                                                                                                                                                                                                                                                                                                                                                                                  |
|-------------|--------------|-----------------------|-----------|-------------------------------------------------------------------------------------------------------------------------------------------------------------------------------------------------------------------------------------------------------------------------------------------------------------------------------------------------------------------------------------------------------------------------------------------------------------------------------------------------------------------------------------------------------------------------------------------------------------------------------------------------------------------------------------------------------------------------------------------------------------------------------------------------------------------------------------------------------------------------------------------------------------------------------------|
| Beneficiary | Subsistence  | Timber and Fiber anc  | exclude   | askin sking salem mysella eonomus newmarket sulfur peltandra horticultur agricultur alternativ aqua.*cultur monocultur non-nativ pelto apelt peltu pelta pelte provid.* no clue provid.* notice provid.* basis provid.*expertise pelti refur furc iskin skink skin lesion skin condition independ                                                                                                                                                                                                                                                                                                                                                                                                                                                                                                                                                                                                                                   |
| Beneficiary | Subsistence  | Building Material Sut | include   | grass reed mud stone rock granit limestone shells coral rock sand                                                                                                                                                                                                                                                                                                                                                                                                                                                                                                                                                                                                                                                                                                                                                                                                                                                                   |
| Beneficiary | Subsistence  | Building Material Sut | near      | subsistence tribal tribe indigenous.*people indian population indian people indigenous.*cultur indigenous.*people indian population indian people native cultur native person native american native village traditional use traditional sustainable use sustenance traditional way depend on the land dependent on the land dependent upon the land                                                                                                                                                                                                                                                                                                                                                                                                                                                                                                                                                                                |
| Beneficiary | Subsistence  | Building Material Sut | exclude   | grassroot grass-root independ capstone keystone touchstone horticultur agricultur alternativ aqua.*cultur monocultur non-nativ cornerstone agreed breed milestone rockport rocky mountain gabion rockcress rockfish larock rock crab shamrock rock shrimp rock cancer rockaway rocky Rock Cove rockingham bedrock rock fish rock jasmine rockport rockaway rocky Rock Cove sediment channel hammock legend dune management.*description report inventory list.*structure burnunit burn.*unit facilit forest.*manag gis document data spit transport site adverse bedrock clay creek clayton sandwich runoff sandwort sandine ersand esand dsand sandy sanddune sand dune sandspur sander ssand sandwort sandpiper sand filter esand dsand sand pine sandusky sand grass sandplain sandown thousand carex carey personal care careo careful aquarium care lawn care wood.*smoke sediment channel preservativ pah hab hazard highhigh |
| Beneficiary | Recreational | Recreational          | include   | recreation vacation amenities visitor tourist tourism visiting                                                                                                                                                                                                                                                                                                                                                                                                                                                                                                                                                                                                                                                                                                                                                                                                                                                                      |
| Beneficiary | Recreational | Recreational          | exclude   | research scien student teach                                                                                                                                                                                                                                                                                                                                                                                                                                                                                                                                                                                                                                                                                                                                                                                                                                                                                                        |
| Beneficiary | Recreational | experienrcs and View  | include   | horseback rid hike hiking rock climb bike biking bicycl camping camper camps campground birding birder outing sunbath beach.*comb sightsee shelling beach.*activit sight-see sun-bath beach.*goer beach.*going picnic beach.*collect collect.*beach gather.*beach beach.*gather snowmobil skiing sledding ski area ski resort snow sport off-road vehicle birdwatch bird watch wildlife view view wildlife encounter whale sight whale watch nature tour bird blind watch bird                                                                                                                                                                                                                                                                                                                                                                                                                                                      |

| Category    | Class        | SubClass              | Word_type | S2                                                                                                                                                                                                                                                                                                                                                               | S3                                                                                                                                                                                                                                                                                                                                                                                                                                                                                                                                                                                                                                                                                                                                                                                                                                                                                                                                                                                                                                                                                                                                                           |
|-------------|--------------|-----------------------|-----------|------------------------------------------------------------------------------------------------------------------------------------------------------------------------------------------------------------------------------------------------------------------------------------------------------------------------------------------------------------------|--------------------------------------------------------------------------------------------------------------------------------------------------------------------------------------------------------------------------------------------------------------------------------------------------------------------------------------------------------------------------------------------------------------------------------------------------------------------------------------------------------------------------------------------------------------------------------------------------------------------------------------------------------------------------------------------------------------------------------------------------------------------------------------------------------------------------------------------------------------------------------------------------------------------------------------------------------------------------------------------------------------------------------------------------------------------------------------------------------------------------------------------------------------|
| Beneficiary | Subsistence  | Timber and Fiber anc  | exclude   | deerfield productiv harvest.*crop crop.*harvest harvest<br>data horticultr agricultur alternativ aqua.*cultur monocultur non-<br>nativ independ                                                                                                                                                                                                                  | grassroot grass-<br>root independ marshfield marshall braintree park woody lakewood kirkwood <br>woodpecker woods hole wood dock wood preserv woodneck woodbury wood<br>stake wooden wood tick woodland wood turtle tree frog woodbridge treated<br>lumber treated wood wood<br>stove reproduct horticultr agricultur alternativ aqua.*cultur monocultur non-<br>nativ cash category sewage sanitary acquatic management.*area fish wash dnr<br> mcbp trash shoreline pineda pinellas legend pine.*island pine.*barren vash el<br>mer elm st ashe coal<br>ash mash sash cash bash overwhelm oakdale oakley croak coal.*ash delmarva<br> fashion pineland barrier.*island water.*pollution soak pine.*beach over.*whel<br>med barrier.*beach ashore sand.*pine shorebird percent metals oakland silver<br>side hash develm hairstreak crash pine.*hills ocean.*pine oak.*harbor oak.*rid<br>ge pine.*seed sea grass freed mcreedy sea-<br>grass eelgrass oyster.*grass seagrass grassland sea-<br>grass decreed breed agreed haynes hay.*barn hayden cottonwood freed cotto<br>ntail reedgrass hayen woodfern sandalwoods wood satyr wood borer wood<br>nymph |
| Beneficiary | Subsistence  | Building Material Sut | include   | build construct                                                                                                                                                                                                                                                                                                                                                  |                                                                                                                                                                                                                                                                                                                                                                                                                                                                                                                                                                                                                                                                                                                                                                                                                                                                                                                                                                                                                                                                                                                                                              |
| Beneficiary | Subsistence  | Building Material Sut | near      | subsistence tribal tribe indigenous.*people indian population indian<br>people indigenous.*cultur indigenous.*people indian population indian<br>people native cultur native person native american native village traditional<br>use traditional sustainable use sustenance traditional way depend on the<br>land dependent on the land dependent upon the land |                                                                                                                                                                                                                                                                                                                                                                                                                                                                                                                                                                                                                                                                                                                                                                                                                                                                                                                                                                                                                                                                                                                                                              |
| Beneficiary | Subsistence  | Building Material Sut | exclude   | horticultr agricultur alternativ aqua.*cultur monocultur non-nativ capacity                                                                                                                                                                                                                                                                                      |                                                                                                                                                                                                                                                                                                                                                                                                                                                                                                                                                                                                                                                                                                                                                                                                                                                                                                                                                                                                                                                                                                                                                              |
| Beneficiary | Recreational | Recreational          | include   | golf course athletic field baseball football soccer                                                                                                                                                                                                                                                                                                              |                                                                                                                                                                                                                                                                                                                                                                                                                                                                                                                                                                                                                                                                                                                                                                                                                                                                                                                                                                                                                                                                                                                                                              |
| Beneficiary | Recreational | Recreational          | exclude   |                                                                                                                                                                                                                                                                                                                                                                  |                                                                                                                                                                                                                                                                                                                                                                                                                                                                                                                                                                                                                                                                                                                                                                                                                                                                                                                                                                                                                                                                                                                                                              |
| Beneficiary | Recreational | experienrcs and View  | include   | outdoor natur wildlife animal wildflower out-of doors                                                                                                                                                                                                                                                                                                            | pier waterfront boardwalk                                                                                                                                                                                                                                                                                                                                                                                                                                                                                                                                                                                                                                                                                                                                                                                                                                                                                                                                                                                                                                                                                                                                    |

| Category    | Class        | SubClass                      | Word_type | S4    | S5                                                     |
|-------------|--------------|-------------------------------|-----------|-------|--------------------------------------------------------|
|             |              |                               |           |       |                                                        |
| Beneficiary | Subsistence  | Timber and Fiber ancexclude   |           |       |                                                        |
| Beneficiary | Subsistence  | Building Material Sut         | include   |       |                                                        |
|             |              |                               |           |       |                                                        |
| Beneficiary | Subsistence  | Building Material Sut near    |           |       |                                                        |
|             |              |                               |           |       |                                                        |
| Beneficiary | Subsistence  | Building Material Sut exclude |           |       |                                                        |
| Beneficiary | Recreational | Recreational                  | include   |       |                                                        |
| Beneficiary | Recreational | Recreational                  | exclude   |       |                                                        |
|             |              |                               |           |       |                                                        |
| Beneficiary | Recreational | experienrcs and View          | include   | trail | family families children visitor touris roamer roaming |

| Category    | Class        | SubClass                      | Word_type | S6                  | S7                            |
|-------------|--------------|-------------------------------|-----------|---------------------|-------------------------------|
|             |              |                               |           |                     |                               |
| Beneficiary | Subsistence  | Timber and Fiber ancexclude   |           |                     |                               |
| Beneficiary | Subsistence  | Building Material Sut         | include   |                     |                               |
|             |              |                               |           |                     |                               |
| Beneficiary | Subsistence  | Building Material Sut near    |           |                     |                               |
|             |              |                               |           |                     |                               |
| Beneficiary | Subsistence  | Building Material Sut exclude |           |                     |                               |
| Beneficiary | Recreational | Recreational                  | include   |                     |                               |
| Beneficiary | Recreational | Recreational                  | exclude   |                     |                               |
|             |              |                               |           |                     |                               |
| Beneficiary | Recreational | experienrcs and View          | include   | collect gather pick | view watcher watching witness |

| Category    | Class        | SubClass              | Word_type | S8                                                                                                                                                                                                                                   | S9    |
|-------------|--------------|-----------------------|-----------|--------------------------------------------------------------------------------------------------------------------------------------------------------------------------------------------------------------------------------------|-------|
|             |              |                       |           |                                                                                                                                                                                                                                      |       |
| Beneficiary | Subsistence  | Timber and Fiber anc  | exclude   |                                                                                                                                                                                                                                      |       |
| Beneficiary | Subsistence  | Building Material Sut | include   |                                                                                                                                                                                                                                      |       |
|             |              |                       |           |                                                                                                                                                                                                                                      |       |
| Beneficiary | Subsistence  | Building Material Sut | near      |                                                                                                                                                                                                                                      |       |
|             |              |                       |           |                                                                                                                                                                                                                                      |       |
| Beneficiary | Subsistence  | Building Material Sut | exclude   |                                                                                                                                                                                                                                      |       |
| Beneficiary | Recreational | Recreational          | include   |                                                                                                                                                                                                                                      |       |
| Beneficiary | Recreational | Recreational          | exclude   |                                                                                                                                                                                                                                      |       |
| Beneficiary | Recreational | experienrcs and View  | include   | scenic scenery horizon skyline vantage point vistas observation point observation deck observation platform observation area vista point scenic vista natural vista beauty beautiful panorama panoramic viewscape view scape idyllic | sight |

| Category    | Class        | SubClass                      | Word_type | S10                                                | S11                                                                                                                                                                                                         |
|-------------|--------------|-------------------------------|-----------|----------------------------------------------------|-------------------------------------------------------------------------------------------------------------------------------------------------------------------------------------------------------------|
|             |              |                               |           |                                                    |                                                                                                                                                                                                             |
| Beneficiary | Subsistence  | Timber and Fiber and exclude  |           |                                                    |                                                                                                                                                                                                             |
| Beneficiary | Subsistence  | Building Material Sub         | include   |                                                    |                                                                                                                                                                                                             |
|             |              |                               |           |                                                    |                                                                                                                                                                                                             |
| Beneficiary | Subsistence  | Building Material Sub near    |           |                                                    |                                                                                                                                                                                                             |
|             |              |                               |           |                                                    |                                                                                                                                                                                                             |
| Beneficiary | Subsistence  | Building Material Sub exclude |           |                                                    |                                                                                                                                                                                                             |
| Beneficiary | Recreational | Recreational                  | include   |                                                    |                                                                                                                                                                                                             |
| Beneficiary | Recreational | Recreational                  | exclude   |                                                    |                                                                                                                                                                                                             |
|             |              |                               |           |                                                    |                                                                                                                                                                                                             |
| Beneficiary | Recreational | experiences and View          | include   | outdoor   natur   wildlife   animal   bird   whale | sound   listen   sensation   sensory   auditory   noise   audible   scent   sensory   olfactory   auditory   smell   listen   noise   aroma   visual   insects.*hear   hear.*insects   fragrant   fragrance |

| Category    | Class        | SubClass                      | Word_type | S12                                                       | S13 |
|-------------|--------------|-------------------------------|-----------|-----------------------------------------------------------|-----|
|             |              |                               |           |                                                           |     |
| Beneficiary | Subsistence  | Timber and Fiber and exclude  |           |                                                           |     |
| Beneficiary | Subsistence  | Building Material Sub         | include   |                                                           |     |
|             |              |                               |           |                                                           |     |
| Beneficiary | Subsistence  | Building Material Sub near    |           |                                                           |     |
|             |              |                               |           |                                                           |     |
| Beneficiary | Subsistence  | Building Material Sub exclude |           |                                                           |     |
| Beneficiary | Recreational | Recreational                  | include   |                                                           |     |
| Beneficiary | Recreational | Recreational                  | exclude   |                                                           |     |
|             |              |                               |           |                                                           |     |
| Beneficiary | Recreational | experiences and View          | include   | sunrise   sunset   eclipse   sundown   rainbow   twilight |     |

| Category    | Class        | SubClass                     | Word_type | S1                                                                                                                                                                                                               |
|-------------|--------------|------------------------------|-----------|------------------------------------------------------------------------------------------------------------------------------------------------------------------------------------------------------------------|
| Beneficiary | Recreational | experiencrs and View near    |           |                                                                                                                                                                                                                  |
|             |              |                              |           |                                                                                                                                                                                                                  |
| Beneficiary | Recreational | experiencrs and View exclude |           | campaign suppl campbell salmon.*camp highhigh management.*issue forsythe jug.*bay answers.*question divert wastewater steelhead diversion trailer traillii hitchhike ladder passage barrier barriers bay scallop |
|             |              |                              |           |                                                                                                                                                                                                                  |
| Beneficiary | Recreational | Food Pickers and Gat         | include   | collect pick gather recreat edible recreat sport visitor touris                                                                                                                                                  |
| Beneficiary | Recreational | Food Pickers and Gat near    |           | food berries berry mushroom fruit herbs nut roots asparagus                                                                                                                                                      |
|             |              |                              |           |                                                                                                                                                                                                                  |
| Beneficiary | Recreational | Food Pickers and Gat exclude |           | requirement review bayview data specimen nutrient nutria minute transport cranberr hunt trap                                                                                                                     |
|             |              |                              |           |                                                                                                                                                                                                                  |
| Beneficiary | Recreational | Hunters                      | include   | hunt trap                                                                                                                                                                                                        |
| Beneficiary | Recreational | Hunters                      | near      | recreat sport opportunit experienc enjoy relax families family children visitor tours permit activit activities                                                                                                  |

| Category    | Class        | SubClass                     | Word_type | S2                                                                                                                                                                                                                                                                                                         | S3                                                                                          |
|-------------|--------------|------------------------------|-----------|------------------------------------------------------------------------------------------------------------------------------------------------------------------------------------------------------------------------------------------------------------------------------------------------------------|---------------------------------------------------------------------------------------------|
| Beneficiary | Recreational | experiencrs and View near    |           | scenic panoramic aesthetic experient enjoy relax observ view overlook vista opportun                                                                                                                                                                                                                       |                                                                                             |
| Beneficiary | Recreational | experiencrs and View exclude |           | bayview review bayview overview in view of over-view over-view peer viewpoint purview viewed observ.*study professional angler fish boat hunt swimmer swimming diver diving swam collect gather pick natural resource naturally broader view broad view often overlook may be overlooked overlook.*concern | pierce piermont pierson pieris fishing pier pierre waterfront resident                      |
| Beneficiary | Recreational | Food Pickers and Gat include |           | collect pick gather recreat edible recreat sport visitor touris                                                                                                                                                                                                                                            | recreat sport opportunit experient enjoy relax families family children visitor touris      |
| Beneficiary | Recreational | Food Pickers and Gat near    |           | shellfish clam oyster scallop lobster mussel crab shrimp abalone crawfish crayfish crustacea                                                                                                                                                                                                               | clammer clamming shellfisher shellfishing clam.*dig dig.*clam shellfish.*dig dig.*shellfish |
| Beneficiary | Recreational | Food Pickers and Gat exclude |           | requirement review bayview data specimen transport fishery fisheries horseshoe crab samples clami pickerel oyster creek                                                                                                                                                                                    | indigenous digest fishery fisheries                                                         |
| Beneficiary | Recreational | Hunters                      | include   | hunt trapper trapping                                                                                                                                                                                                                                                                                      | waterfowl turkey deer quail duck beaver nutria alligator hogs rabbit                        |
| Beneficiary | Recreational | Hunters                      | near      |                                                                                                                                                                                                                                                                                                            | recreat sport permit                                                                        |

| Category    | Class        | SubClass                     | Word_type | S4                                                                                                                                                                                                                                                                      | S5                                                                                                                                                                                                                                                                                                    |
|-------------|--------------|------------------------------|-----------|-------------------------------------------------------------------------------------------------------------------------------------------------------------------------------------------------------------------------------------------------------------------------|-------------------------------------------------------------------------------------------------------------------------------------------------------------------------------------------------------------------------------------------------------------------------------------------------------|
| Beneficiary | Recreational | experiencrs and View near    |           |                                                                                                                                                                                                                                                                         | outdoor natur wildlife animal scenic panoramic wildflower aesthetic view observ overlook vista experienc enjoy relax opportun                                                                                                                                                                         |
| Beneficiary | Recreational | experiencrs and View exclude |           | trailer hitchhike traillii hunt                                                                                                                                                                                                                                         | bayview review bayview overview in view of over-view over-view peer viewpoint purview viewed observ.*study professional angler fish boat hunt swimmer swimming diver diving swam collect gather pick natural resource naturally broader view broad view often overlook may overlook overlook.*concern |
| Beneficiary | Recreational | Food Pickers and Gat include |           | clammer clamming shellfisher shellfishing clam.*dig dig.*clam shellfish.*dig dig*shellfish                                                                                                                                                                              | collect pick gather recreat sport trail season opportunit experienc enjoy relax families family children                                                                                                                                                                                              |
| Beneficiary | Recreational | Food Pickers and Gat near    |           |                                                                                                                                                                                                                                                                         | edible                                                                                                                                                                                                                                                                                                |
| Beneficiary | Recreational | Food Pickers and Gat exclude |           | extract commercial business product industry commodity commodities goods harvest profit buy livelihood job dealer market corporation sale sell income artisan profession indigenous digest fishery fisheries trade trading reproduct productivity salem mysella eonomus |                                                                                                                                                                                                                                                                                                       |
| Beneficiary | Recreational | Hunters                      | include   | game                                                                                                                                                                                                                                                                    | hide skin fur furs fur-bear fur bear furbear pelt                                                                                                                                                                                                                                                     |
| Beneficiary | Recreational | Hunters                      | near      | animal bird wild harvest                                                                                                                                                                                                                                                |                                                                                                                                                                                                                                                                                                       |

| Category    | Class        | SubClass                     | Word_type | S6                                                                               | S7                                                                                                                                                                                                                                                                                                                                                                                                                                                                                                                                                                                                                                                                                                                                                                                                                                                                                                                                                                                                                                                                                                                                                                                                                                                                                                                                                                                                                                                                                                   |
|-------------|--------------|------------------------------|-----------|----------------------------------------------------------------------------------|------------------------------------------------------------------------------------------------------------------------------------------------------------------------------------------------------------------------------------------------------------------------------------------------------------------------------------------------------------------------------------------------------------------------------------------------------------------------------------------------------------------------------------------------------------------------------------------------------------------------------------------------------------------------------------------------------------------------------------------------------------------------------------------------------------------------------------------------------------------------------------------------------------------------------------------------------------------------------------------------------------------------------------------------------------------------------------------------------------------------------------------------------------------------------------------------------------------------------------------------------------------------------------------------------------------------------------------------------------------------------------------------------------------------------------------------------------------------------------------------------|
|             |              |                              |           |                                                                                  | <p>spectacle natur environment ecosystem estuary coastal landscape ocean shore beach water acomodat activit aesthetic ameniable amenit appreciat artisan artist asset attract beaut beneficial benefit bequest bountiful bounty business buy care caring charisma cherish children collect comfort commercial commodities commodity goods concern conserv corporation critical dealer delicious desired desirable destination econom edible educat encourag endangered enhance enhancing enjoy encounter enthusiast experienc exploit extract families favorable favor feel festiv ceremon fur furs fur-bear fur-bear furbear future gather generation hallmark harvest healthy heritage hide hunt income indigenous.*people indian population indian people indigenous.*person industry initiative inspir interest job learn legacy lensure livelihood market meat native.*person native american observ opportunit participant participate pelt pick pleasant popular preserv products profession profit promote promotion purpose protect quality.*life rare recreat relax resource restor sale save saving sell sight skins special specimen spectacular sport steward subsist sustenance threatened together tours trade trading sustainabl tradition treasure tribal tribe unique valuable value valuing view visit visitor watch well suited well-suited wonder allure alluring mystique option value lifeblood jewel extraordinary excellent amaze amazing stunning majestic spectacular</p> |
| Beneficiary | Recreational | experiencrs and View near    |           | natural material flower shells seeds natural object plants insects fungi mushroo |                                                                                                                                                                                                                                                                                                                                                                                                                                                                                                                                                                                                                                                                                                                                                                                                                                                                                                                                                                                                                                                                                                                                                                                                                                                                                                                                                                                                                                                                                                      |
|             |              |                              |           |                                                                                  | <p>bayview viewcontent views as issues target view view.*data points of view elevation view known view view this document seek the view solicit the view reflect the view review bayview interview data.*network aesthetic.*nuisance aesthetic.*problem aesthetic.*degradation vista.*hermosa vistamar views.*agency views.*department sewage.*collection aerial.*view.*modif 15.*visitor treatment keep.*loisiana regulation program.*beautification beautification.*program inspir.*problem inspir.*strateg program.*inspire.*action conference.*inspir tool.*inspir siberian chamisso sandwort pondweed goal success.*inspir legislat meadowbeauty educat.*inspir mission initiative agency.*funding slough program slough 15.*visit or plankton.*reduce ad.*hoc inspir.*steward inspir.*teach beautyberry Harper.*beauty meadow-beauty meadow beauty river beauty beautiful jacob spring beauty overview in view of over-view over-view viewed our view species viewer point of view exhibit landscape design landscape ecology built landscape landscaper purview viewpoint view point negative view their views landscape scale landscape perspective temperature value biomass value salem mysella economus newmarket reproduc productivity broad view broader view</p>                                                                                                                                                                                                                       |
| Beneficiary | Recreational | experiencrs and View exclude |           | transplant gather.*for.*hunt pickerel                                            |                                                                                                                                                                                                                                                                                                                                                                                                                                                                                                                                                                                                                                                                                                                                                                                                                                                                                                                                                                                                                                                                                                                                                                                                                                                                                                                                                                                                                                                                                                      |
| Beneficiary | Recreational | Food Pickers and Gat         | include   |                                                                                  |                                                                                                                                                                                                                                                                                                                                                                                                                                                                                                                                                                                                                                                                                                                                                                                                                                                                                                                                                                                                                                                                                                                                                                                                                                                                                                                                                                                                                                                                                                      |
| Beneficiary | Recreational | Food Pickers and Gat near    |           |                                                                                  |                                                                                                                                                                                                                                                                                                                                                                                                                                                                                                                                                                                                                                                                                                                                                                                                                                                                                                                                                                                                                                                                                                                                                                                                                                                                                                                                                                                                                                                                                                      |
|             |              |                              |           |                                                                                  |                                                                                                                                                                                                                                                                                                                                                                                                                                                                                                                                                                                                                                                                                                                                                                                                                                                                                                                                                                                                                                                                                                                                                                                                                                                                                                                                                                                                                                                                                                      |
| Beneficiary | Recreational | Food Pickers and Gat exclude |           |                                                                                  |                                                                                                                                                                                                                                                                                                                                                                                                                                                                                                                                                                                                                                                                                                                                                                                                                                                                                                                                                                                                                                                                                                                                                                                                                                                                                                                                                                                                                                                                                                      |
| Beneficiary | Recreational | Hunters                      | include   |                                                                                  |                                                                                                                                                                                                                                                                                                                                                                                                                                                                                                                                                                                                                                                                                                                                                                                                                                                                                                                                                                                                                                                                                                                                                                                                                                                                                                                                                                                                                                                                                                      |
| Beneficiary | Recreational | Hunters                      | near      |                                                                                  |                                                                                                                                                                                                                                                                                                                                                                                                                                                                                                                                                                                                                                                                                                                                                                                                                                                                                                                                                                                                                                                                                                                                                                                                                                                                                                                                                                                                                                                                                                      |

| Category    | Class        | SubClass                     | Word_type                                                                                                                                                                                                                                                                                               | S8 | S9 |
|-------------|--------------|------------------------------|---------------------------------------------------------------------------------------------------------------------------------------------------------------------------------------------------------------------------------------------------------------------------------------------------------|----|----|
| Beneficiary | Recreational | experiencrs and View near    | comfort   desirable   destination   enjoy   favorable   pleasant   popular   relax   special   sp<br>ectacular   tours   treasure   well suited   well-<br>suited   wonder   allure   alluring   mystique   extraordinary   excellent   amaze   amazing  <br>stunning   majestic   spectacular   scenic |    |    |
|             |              |                              |                                                                                                                                                                                                                                                                                                         |    |    |
| Beneficiary | Recreational | experiencrs and View exclude | meadow beauty   river beauty   beautiful jacob   spring beauty   meadow-beauty   meadowbeauty   horizontal   deepwater horizon   may be over                                                                                                                                                            |    |    |
| Beneficiary | Recreational | Food Pickers and Gat include |                                                                                                                                                                                                                                                                                                         |    |    |
| Beneficiary | Recreational | Food Pickers and Gat near    |                                                                                                                                                                                                                                                                                                         |    |    |
| Beneficiary | Recreational | Food Pickers and Gat exclude |                                                                                                                                                                                                                                                                                                         |    |    |
| Beneficiary | Recreational | Hunters                      | include                                                                                                                                                                                                                                                                                                 |    |    |
| Beneficiary | Recreational | Hunters                      | near                                                                                                                                                                                                                                                                                                    |    |    |

| Category    | Class        | SubClass                     | Word_type | S10                                                                                                                                                                                                                                                                                                            | S11                                                                                                                                                                                                                                                                                                                                                                                                                                                                                                                                                                                                                                                                         |
|-------------|--------------|------------------------------|-----------|----------------------------------------------------------------------------------------------------------------------------------------------------------------------------------------------------------------------------------------------------------------------------------------------------------------|-----------------------------------------------------------------------------------------------------------------------------------------------------------------------------------------------------------------------------------------------------------------------------------------------------------------------------------------------------------------------------------------------------------------------------------------------------------------------------------------------------------------------------------------------------------------------------------------------------------------------------------------------------------------------------|
| Beneficiary | Recreational | experiencrs and View near    |           | view overlook vista watch sight observ                                                                                                                                                                                                                                                                         |                                                                                                                                                                                                                                                                                                                                                                                                                                                                                                                                                                                                                                                                             |
| Beneficiary | Recreational | experiencrs and View exclude |           | bayview review bayview overview in view of over-view over-view peer viewpoint purview viewed observ.*study professional angler fish boat hunt swimmer swimming diver diving swam collect gather pick natural resource naturally snowbird broad view broader view often overlook may overlook overlook.*concern | aromaticum listening post environmentally sound western sound polycylic george sound west sound south sound pugetsound sound science sound improvement Albemarle sound pamlico sound long island sound art educat inspir the sound Puget sound croaker buffer listening session fluorescent quiescent crescent audubon 15.*visitor noxious unpleasant using increasing rising losing accessing dressing crossing disposing promising passing proposing isinglass licensing assessing raising single foreclosing purchasing collapsing processing data monitor measur crucial glisten excessive unnecessary hearing heart pollut shear hear appeal disruptive disturb escent |
| Beneficiary | Recreational | Food Pickers and Gat include |           |                                                                                                                                                                                                                                                                                                                |                                                                                                                                                                                                                                                                                                                                                                                                                                                                                                                                                                                                                                                                             |
| Beneficiary | Recreational | Food Pickers and Gat near    |           |                                                                                                                                                                                                                                                                                                                |                                                                                                                                                                                                                                                                                                                                                                                                                                                                                                                                                                                                                                                                             |
| Beneficiary | Recreational | Food Pickers and Gat exclude |           |                                                                                                                                                                                                                                                                                                                |                                                                                                                                                                                                                                                                                                                                                                                                                                                                                                                                                                                                                                                                             |
| Beneficiary | Recreational | Hunters                      | include   |                                                                                                                                                                                                                                                                                                                |                                                                                                                                                                                                                                                                                                                                                                                                                                                                                                                                                                                                                                                                             |
| Beneficiary | Recreational | Hunters                      | near      |                                                                                                                                                                                                                                                                                                                |                                                                                                                                                                                                                                                                                                                                                                                                                                                                                                                                                                                                                                                                             |

| Category    | Class        | SubClass                                                                                                                                                                                                                                                                                                                                                                                                           | Word_type | S12 | S13 |
|-------------|--------------|--------------------------------------------------------------------------------------------------------------------------------------------------------------------------------------------------------------------------------------------------------------------------------------------------------------------------------------------------------------------------------------------------------------------|-----------|-----|-----|
| Beneficiary | Recreational | experiencrs and View near                                                                                                                                                                                                                                                                                                                                                                                          |           |     |     |
|             |              | rodent staff presentation created.*volunteer 15.*visit<br>or pollution pollutant climate temperature marina isl<br>and provision 15.*visitor trout smelt sunset of sunset<br>on biofog to<br>sunset image imaging clouded navigat sunset<br>of sunset on sunset in sunsets on sunsets<br>in infog turbid rainbow snake after sunset rainbow<br>star rainbow surf sunset at before sunset sunset<br>cove sunrise to |           |     |     |
|             |              | experiencrs and View exclude                                                                                                                                                                                                                                                                                                                                                                                       |           |     |     |
|             |              | Food Pickers and Gat                                                                                                                                                                                                                                                                                                                                                                                               | include   |     |     |
|             |              | Food Pickers and Gat near                                                                                                                                                                                                                                                                                                                                                                                          |           |     |     |
| Beneficiary | Recreational | Food Pickers and Gat exclude                                                                                                                                                                                                                                                                                                                                                                                       |           |     |     |
|             |              | Hunters                                                                                                                                                                                                                                                                                                                                                                                                            | include   |     |     |
|             |              | Hunters                                                                                                                                                                                                                                                                                                                                                                                                            | near      |     |     |

| Category    | Class         | SubClass                 | Word_type | S1                                                                                                                                                                                                                                                                                      |
|-------------|---------------|--------------------------|-----------|-----------------------------------------------------------------------------------------------------------------------------------------------------------------------------------------------------------------------------------------------------------------------------------------|
| Beneficiary | Recreational  | Hunters                  | exclude   | transport riparian buffer vegetat extrapolat strap entrap strap sediment.*trap contam.*trap pollut.*trap trap.*contam trap.*pollut nutrient.*trap trap.*nutrient sand.*trap trap.*sand trap.*sediment litter trap fish trap lobster trap trap.*site transport lobster shunt hunts point |
| Beneficiary | Recreational  | Anglers                  | include   | angler angling                                                                                                                                                                                                                                                                          |
| Beneficiary | Recreational  | Anglers                  | near      |                                                                                                                                                                                                                                                                                         |
| Beneficiary | Recreational  | Anglers                  | exclude   | dangl rangl sangl tangl bangl wangl                                                                                                                                                                                                                                                     |
| Beneficiary | Recreational  | Waders and Swimmers      | include   | snorkel SCUBA swim swam wade diving dive diver wading bather bathing                                                                                                                                                                                                                    |
| Beneficiary | Recreational  | Waders and Swimmers      | exclude   | diversi diverse divert biodiversity diving.*duck wastewater steelhead diversion flock spoonbill egret waterfowl wading.*bird swamp kwader diverg swimming                                                                                                                               |
| Beneficiary | Recreational  | Boaters                  | include   | boat canoe kayak rowing sailing sailor jetski jet.*ski surfing surfer watercraft paddle parasail sail.*boat                                                                                                                                                                             |
| Beneficiary | Recreational  | Boaters                  | near      |                                                                                                                                                                                                                                                                                         |
| Beneficiary | Recreational  | Boaters                  | exclude   | growing longboat.*pass surface boat.*method borrow burrow crow hrow grow volcano rrrow                                                                                                                                                                                                  |
| Beneficiary | Inspirational | Inspirational            | include   | inspir cultural.*significance cherish treasure wonder beaut renowned                                                                                                                                                                                                                    |
| Beneficiary | Inspirational | Inspirational            | near      |                                                                                                                                                                                                                                                                                         |
| Beneficiary | Inspirational | Inspirational            | exclude   | treasurer meadow beauty river beauty beautiful jacob spring beauty meadowbeauty meadow-beauty beautyberry Harper.*beauty                                                                                                                                                                |
| Beneficiary | Inspirational | Spiritual and Ceremonies | include   | festival observance religi ceremon baptism wedding spirit worship prayer                                                                                                                                                                                                                |
| Beneficiary | Inspirational | Spiritual and Ceremonies | near      |                                                                                                                                                                                                                                                                                         |
| Beneficiary | Inspirational | Spiritual and Ceremonies | exclude   | formal.*designation.*ceremony entrepreneur cooperation spirit of trust spirit lake                                                                                                                                                                                                      |
| Beneficiary | Inspirational | Artists                  | include   | poet painter artist sculpture sculptor sculpting carving pottery photographer painting artwork art mural nature photog outdoor photog environmental photog local photog                                                                                                                 |
| Beneficiary | Inspirational | Artists                  | near      |                                                                                                                                                                                                                                                                                         |
| Beneficiary | Inspirational | Artists                  | exclude   | sculpta aerial photograph digitiz orthophotograph sculptus the art of the art and science of photo-voltaic photovoltaic popcorn flower popcornflower                                                                                                                                    |
| Beneficiary | Learning      | Learning                 | include   | learn                                                                                                                                                                                                                                                                                   |
| Beneficiary | Learning      | Learning                 | near      |                                                                                                                                                                                                                                                                                         |
| Beneficiary | Learning      | Learning                 | exclude   | clearnose                                                                                                                                                                                                                                                                               |
| Beneficiary | Learning      | Educators and Students   | include   | educat academ teach professor student elementary middle.*school junior.*high secondary.*school high.*school school.*children fieldtrip field trip outdoor lab classroom classes internship outdoor school K-12                                                                          |

| Category    | Class         | SubClass                 | Word_type | S2                                                                                                                                                                                                                                                                                                                                                                                                                                                                                                                | S3                                                                                           |
|-------------|---------------|--------------------------|-----------|-------------------------------------------------------------------------------------------------------------------------------------------------------------------------------------------------------------------------------------------------------------------------------------------------------------------------------------------------------------------------------------------------------------------------------------------------------------------------------------------------------------------|----------------------------------------------------------------------------------------------|
| Beneficiary | Recreational  | Hunters                  | exclude   | extract commercial business product industry commodity commodities goods harvest profit buy livelihood job dealer market corporation sale sell income artisan profession shunt huntley huntington hunterdon trade trading transport riparian buffer vegetat extrapolat strap entrap strap sediment.*trap contam.*trap pollut.*trap trap.*contam trap.*pollut nutrient.*trap trap.*nutrient sand.*trap trap.*sand trap.*sediment litter trap fish trap lobster trap trap.*site transport lobster shunt hunts point | transport duck farm quahogs                                                                  |
| Beneficiary | Recreational  | Anglers                  | include   | fisher fishing                                                                                                                                                                                                                                                                                                                                                                                                                                                                                                    | fly-fishing fly fishing fly fisher fly-fisher flyfisher flyfishing                           |
| Beneficiary | Recreational  | Anglers                  | near      | recreat sport opportunit experienc enjoy relax families family children visitor tours salt water saltwater salt-water fresh water freshwater fresh-water                                                                                                                                                                                                                                                                                                                                                          |                                                                                              |
| Beneficiary | Recreational  | Anglers                  | exclude   | shellfish kingfisher fishery fisheries fort fisher                                                                                                                                                                                                                                                                                                                                                                                                                                                                |                                                                                              |
| Beneficiary | Recreational  | Waders and Swimmers      | include   |                                                                                                                                                                                                                                                                                                                                                                                                                                                                                                                   |                                                                                              |
| Beneficiary | Recreational  | Waders and Swimmers      | exclude   |                                                                                                                                                                                                                                                                                                                                                                                                                                                                                                                   |                                                                                              |
| Beneficiary | Recreational  | Boaters                  | include   | harbor dock marina channel                                                                                                                                                                                                                                                                                                                                                                                                                                                                                        |                                                                                              |
| Beneficiary | Recreational  | Boaters                  | near      | traffic wake activit moor private public access available crowd                                                                                                                                                                                                                                                                                                                                                                                                                                                   |                                                                                              |
| Beneficiary | Recreational  | Boaters                  | exclude   | public safety public support Bight haddock curl sour tropic paraguay fiddle swamp docket harbor seal dock permit New Bedford Harbor zostera publicize publicity publication                                                                                                                                                                                                                                                                                                                                       |                                                                                              |
| Beneficiary | Inspirational | Inspirational            | include   | culture cultural historic                                                                                                                                                                                                                                                                                                                                                                                                                                                                                         | sense of place sense of community pride way of life                                          |
| Beneficiary | Inspirational | Inspirational            | near      | significan value valuable valuing important vital resource need agricultur aquacultur horticultr silvicultur multicultur agri.*cultur aqua.*cultur culturing data abundance biomass habitat temperature value biomass value cultured historical range historically                                                                                                                                                                                                                                                | scotian pride                                                                                |
| Beneficiary | Inspirational | Spiritual and Ceremonial | include   | community event special event popular.*event free event                                                                                                                                                                                                                                                                                                                                                                                                                                                           | day                                                                                          |
| Beneficiary | Inspirational | Spiritual and Ceremonial | near      |                                                                                                                                                                                                                                                                                                                                                                                                                                                                                                                   | event sponsor participate participant                                                        |
| Beneficiary | Inspirational | Spiritual and Ceremonial | exclude   | storm event precipitation event                                                                                                                                                                                                                                                                                                                                                                                                                                                                                   | storm event precipitation event                                                              |
| Beneficiary | Inspirational | Artists                  | include   | writer writing author                                                                                                                                                                                                                                                                                                                                                                                                                                                                                             | contest                                                                                      |
| Beneficiary | Inspirational | Artists                  | near      | inspir environment outdoor natur visit tour creativ                                                                                                                                                                                                                                                                                                                                                                                                                                                               | christmas card essay poetry art photograph                                                   |
| Beneficiary | Inspirational | Artists                  | exclude   | document research grant authori TMDL plan                                                                                                                                                                                                                                                                                                                                                                                                                                                                         | sculpta aerial photograph digitiz orthophotograph sculptus the art of the art and science of |
| Beneficiary | Learning      | Learning                 | include   | museum visitor.*center diorama graphic                                                                                                                                                                                                                                                                                                                                                                                                                                                                            | interpretive interactive educat                                                              |
| Beneficiary | Learning      | Learning                 | near      |                                                                                                                                                                                                                                                                                                                                                                                                                                                                                                                   | trail guide center program                                                                   |
| Beneficiary | Learning      | Learning                 | exclude   |                                                                                                                                                                                                                                                                                                                                                                                                                                                                                                                   |                                                                                              |
| Beneficiary | Learning      | Educators and Students   | include   | youth development                                                                                                                                                                                                                                                                                                                                                                                                                                                                                                 |                                                                                              |

| Category    | Class         | SubClass                 | Word_type | S4                                                                                                                                                                                      | S5                                                                                                                                                                                                                                                                                                                                                                                                                                                                                                                                                                                                                                                                                                                                                                                                        |
|-------------|---------------|--------------------------|-----------|-----------------------------------------------------------------------------------------------------------------------------------------------------------------------------------------|-----------------------------------------------------------------------------------------------------------------------------------------------------------------------------------------------------------------------------------------------------------------------------------------------------------------------------------------------------------------------------------------------------------------------------------------------------------------------------------------------------------------------------------------------------------------------------------------------------------------------------------------------------------------------------------------------------------------------------------------------------------------------------------------------------------|
|             |               |                          |           |                                                                                                                                                                                         | askin sking saalem mysella economy newmarket sulfur peltandra horticultr agricultur alternativ aqua.*cultur monocultur non-nativ peltu apeltu peltu pelta pelte provid.*no clue provid.*notice provid.*basis provid.*expertise pelti refur furc iskin skink skin lesion skin condition subsist tribal tribe indigenous.*people indian population indian people indigenous.*cultur indigenous.*people indian population indian people native.*person native american traditional use traditional sustainable use sustenance traditional way depend on the land dependent on the land dependent upon the land extract commercial business product industry commodity commodities goods harvest profit buy livelihood job dealer market corporation sale sell income artisan profession trade trading worker |
| Beneficiary | Recreational  | Hunters                  | exclude   | snowbird                                                                                                                                                                                |                                                                                                                                                                                                                                                                                                                                                                                                                                                                                                                                                                                                                                                                                                                                                                                                           |
| Beneficiary | Recreational  | Anglers                  | include   | bait                                                                                                                                                                                    | fishermen fisherman fishing                                                                                                                                                                                                                                                                                                                                                                                                                                                                                                                                                                                                                                                                                                                                                                               |
| Beneficiary | Recreational  | Anglers                  | near      | saalem reproduc productivity                                                                                                                                                            |                                                                                                                                                                                                                                                                                                                                                                                                                                                                                                                                                                                                                                                                                                                                                                                                           |
|             |               |                          |           |                                                                                                                                                                                         | commercial business industry commodity commodities goods profit buy livelihood job dealer market corporation sale sell income artisan profession trade trading worker fishery fisheries subsist tribal tribe indigenous.*people indian population indian people indigenous.*cultur indigenous.*people indian population indian people native.*person native american traditional use traditional sustainable use sustenance traditional way depend on the land dependent on the land dependent upon the land                                                                                                                                                                                                                                                                                              |
| Beneficiary | Recreational  | Anglers                  | exclude   | commercial business industry commodity commodities goods profit buy livelihood job dealer market corporation sale sell income artisan profession trade trading worker fishery fisheries |                                                                                                                                                                                                                                                                                                                                                                                                                                                                                                                                                                                                                                                                                                                                                                                                           |
| Beneficiary | Recreational  | Waders and Swimmers      | include   |                                                                                                                                                                                         |                                                                                                                                                                                                                                                                                                                                                                                                                                                                                                                                                                                                                                                                                                                                                                                                           |
| Beneficiary | Recreational  | Waders and Swimmers      | exclude   |                                                                                                                                                                                         |                                                                                                                                                                                                                                                                                                                                                                                                                                                                                                                                                                                                                                                                                                                                                                                                           |
| Beneficiary | Recreational  | Boaters                  | include   |                                                                                                                                                                                         |                                                                                                                                                                                                                                                                                                                                                                                                                                                                                                                                                                                                                                                                                                                                                                                                           |
| Beneficiary | Recreational  | Boaters                  | near      |                                                                                                                                                                                         |                                                                                                                                                                                                                                                                                                                                                                                                                                                                                                                                                                                                                                                                                                                                                                                                           |
|             |               |                          |           |                                                                                                                                                                                         |                                                                                                                                                                                                                                                                                                                                                                                                                                                                                                                                                                                                                                                                                                                                                                                                           |
| Beneficiary | Recreational  | Boaters                  | exclude   |                                                                                                                                                                                         |                                                                                                                                                                                                                                                                                                                                                                                                                                                                                                                                                                                                                                                                                                                                                                                                           |
| Beneficiary | Inspirational | Inspirational            | include   |                                                                                                                                                                                         |                                                                                                                                                                                                                                                                                                                                                                                                                                                                                                                                                                                                                                                                                                                                                                                                           |
| Beneficiary | Inspirational | Inspirational            | near      |                                                                                                                                                                                         |                                                                                                                                                                                                                                                                                                                                                                                                                                                                                                                                                                                                                                                                                                                                                                                                           |
|             |               |                          |           |                                                                                                                                                                                         |                                                                                                                                                                                                                                                                                                                                                                                                                                                                                                                                                                                                                                                                                                                                                                                                           |
| Beneficiary | Inspirational | Inspirational            | exclude   |                                                                                                                                                                                         |                                                                                                                                                                                                                                                                                                                                                                                                                                                                                                                                                                                                                                                                                                                                                                                                           |
| Beneficiary | Inspirational | Spiritual and Ceremonies | include   |                                                                                                                                                                                         |                                                                                                                                                                                                                                                                                                                                                                                                                                                                                                                                                                                                                                                                                                                                                                                                           |
| Beneficiary | Inspirational | Spiritual and Ceremonies | near      |                                                                                                                                                                                         |                                                                                                                                                                                                                                                                                                                                                                                                                                                                                                                                                                                                                                                                                                                                                                                                           |
| Beneficiary | Inspirational | Spiritual and Ceremonies | exclude   |                                                                                                                                                                                         |                                                                                                                                                                                                                                                                                                                                                                                                                                                                                                                                                                                                                                                                                                                                                                                                           |
| Beneficiary | Inspirational | Artists                  | include   |                                                                                                                                                                                         |                                                                                                                                                                                                                                                                                                                                                                                                                                                                                                                                                                                                                                                                                                                                                                                                           |
| Beneficiary | Inspirational | Artists                  | near      |                                                                                                                                                                                         |                                                                                                                                                                                                                                                                                                                                                                                                                                                                                                                                                                                                                                                                                                                                                                                                           |
| Beneficiary | Inspirational | Artists                  | exclude   |                                                                                                                                                                                         |                                                                                                                                                                                                                                                                                                                                                                                                                                                                                                                                                                                                                                                                                                                                                                                                           |
| Beneficiary | Learning      | Learning                 | include   | natural history                                                                                                                                                                         | program center                                                                                                                                                                                                                                                                                                                                                                                                                                                                                                                                                                                                                                                                                                                                                                                            |
| Beneficiary | Learning      | Learning                 | near      |                                                                                                                                                                                         | environment outdoor science educat nature natural                                                                                                                                                                                                                                                                                                                                                                                                                                                                                                                                                                                                                                                                                                                                                         |
| Beneficiary | Learning      | Learning                 | exclude   |                                                                                                                                                                                         | abatement manage the estuary program national estuary program                                                                                                                                                                                                                                                                                                                                                                                                                                                                                                                                                                                                                                                                                                                                             |
| Beneficiary | Learning      | Educators and Students   | include   |                                                                                                                                                                                         |                                                                                                                                                                                                                                                                                                                                                                                                                                                                                                                                                                                                                                                                                                                                                                                                           |

| Category    | Class         | SubClass                 | Word_type | S6                                      | S7 |
|-------------|---------------|--------------------------|-----------|-----------------------------------------|----|
| Beneficiary | Recreational  | Hunters                  | exclude   |                                         |    |
| Beneficiary | Recreational  | Anglers                  | include   |                                         |    |
| Beneficiary | Recreational  | Anglers                  | near      |                                         |    |
| Beneficiary | Recreational  | Anglers                  | exclude   |                                         |    |
| Beneficiary | Recreational  | Waders and Swimmers      | include   |                                         |    |
| Beneficiary | Recreational  | Waders and Swimmers      | exclude   |                                         |    |
| Beneficiary | Recreational  | Boaters                  | include   |                                         |    |
| Beneficiary | Recreational  | Boaters                  | near      |                                         |    |
| Beneficiary | Recreational  | Boaters                  | exclude   |                                         |    |
| Beneficiary | Inspirational | Inspirational            | include   |                                         |    |
| Beneficiary | Inspirational | Inspirational            | near      |                                         |    |
| Beneficiary | Inspirational | Inspirational            | exclude   |                                         |    |
| Beneficiary | Inspirational | Spiritual and Ceremonial | include   |                                         |    |
| Beneficiary | Inspirational | Spiritual and Ceremonial | near      |                                         |    |
| Beneficiary | Inspirational | Spiritual and Ceremonial | exclude   |                                         |    |
| Beneficiary | Inspirational | Artists                  | include   |                                         |    |
| Beneficiary | Inspirational | Artists                  | near      |                                         |    |
| Beneficiary | Inspirational | Artists                  | exclude   |                                         |    |
| Beneficiary | Learning      | Learning                 | include   | history tour discovery lab lab offering |    |
| Beneficiary | Learning      | Learning                 | near      |                                         |    |
| Beneficiary | Learning      | Learning                 | exclude   |                                         |    |
| Beneficiary | Learning      | Educators and Students   | include   |                                         |    |

| Category    | Class         | SubClass                 | Word_type | S8 | S9 |
|-------------|---------------|--------------------------|-----------|----|----|
| Beneficiary | Recreational  | Hunters                  | exclude   |    |    |
| Beneficiary | Recreational  | Anglers                  | include   |    |    |
| Beneficiary | Recreational  | Anglers                  | near      |    |    |
| Beneficiary | Recreational  | Anglers                  | exclude   |    |    |
| Beneficiary | Recreational  | Waders and Swimmers      | include   |    |    |
| Beneficiary | Recreational  | Waders and Swimmers      | exclude   |    |    |
| Beneficiary | Recreational  | Boaters                  | include   |    |    |
| Beneficiary | Recreational  | Boaters                  | near      |    |    |
| Beneficiary | Recreational  | Boaters                  | exclude   |    |    |
| Beneficiary | Inspirational | Inspirational            | include   |    |    |
| Beneficiary | Inspirational | Inspirational            | near      |    |    |
| Beneficiary | Inspirational | Inspirational            | exclude   |    |    |
| Beneficiary | Inspirational | Spiritual and Ceremonial | include   |    |    |
| Beneficiary | Inspirational | Spiritual and Ceremonial | near      |    |    |
| Beneficiary | Inspirational | Spiritual and Ceremonial | exclude   |    |    |
| Beneficiary | Inspirational | Artists                  | include   |    |    |
| Beneficiary | Inspirational | Artists                  | near      |    |    |
| Beneficiary | Inspirational | Artists                  | exclude   |    |    |
| Beneficiary | Learning      | Learning                 | include   |    |    |
| Beneficiary | Learning      | Learning                 | near      |    |    |
| Beneficiary | Learning      | Learning                 | exclude   |    |    |
| Beneficiary | Learning      | Educators and Students   | include   |    |    |

| Category    | Class         | SubClass                 | Word_type | S10 | S11 |
|-------------|---------------|--------------------------|-----------|-----|-----|
| Beneficiary | Recreational  | Hunters                  | exclude   |     |     |
| Beneficiary | Recreational  | Anglers                  | include   |     |     |
| Beneficiary | Recreational  | Anglers                  | near      |     |     |
| Beneficiary | Recreational  | Anglers                  | exclude   |     |     |
| Beneficiary | Recreational  | Waders and Swimmers      | include   |     |     |
| Beneficiary | Recreational  | Waders and Swimmers      | exclude   |     |     |
| Beneficiary | Recreational  | Boaters                  | include   |     |     |
| Beneficiary | Recreational  | Boaters                  | near      |     |     |
| Beneficiary | Recreational  | Boaters                  | exclude   |     |     |
| Beneficiary | Inspirational | Inspirational            | include   |     |     |
| Beneficiary | Inspirational | Inspirational            | near      |     |     |
| Beneficiary | Inspirational | Inspirational            | exclude   |     |     |
| Beneficiary | Inspirational | Spiritual and Ceremonial | include   |     |     |
| Beneficiary | Inspirational | Spiritual and Ceremonial | near      |     |     |
| Beneficiary | Inspirational | Spiritual and Ceremonial | exclude   |     |     |
| Beneficiary | Inspirational | Artists                  | include   |     |     |
| Beneficiary | Inspirational | Artists                  | near      |     |     |
| Beneficiary | Inspirational | Artists                  | exclude   |     |     |
| Beneficiary | Learning      | Learning                 | include   |     |     |
| Beneficiary | Learning      | Learning                 | near      |     |     |
| Beneficiary | Learning      | Learning                 | exclude   |     |     |
| Beneficiary | Learning      | Educators and Students   | include   |     |     |

| Category    | Class         | SubClass                 | Word_type | S12 | S13 |
|-------------|---------------|--------------------------|-----------|-----|-----|
|             |               |                          |           |     |     |
| Beneficiary | Recreational  | Hunters                  | exclude   |     |     |
| Beneficiary | Recreational  | Anglers                  | include   |     |     |
| Beneficiary | Recreational  | Anglers                  | near      |     |     |
|             |               |                          |           |     |     |
| Beneficiary | Recreational  | Anglers                  | exclude   |     |     |
| Beneficiary | Recreational  | Waders and Swimmers      | include   |     |     |
| Beneficiary | Recreational  | Waders and Swimmers      | exclude   |     |     |
| Beneficiary | Recreational  | Boaters                  | include   |     |     |
| Beneficiary | Recreational  | Boaters                  | near      |     |     |
|             |               |                          |           |     |     |
| Beneficiary | Recreational  | Boaters                  | exclude   |     |     |
| Beneficiary | Inspirational | Inspirational            | include   |     |     |
| Beneficiary | Inspirational | Inspirational            | near      |     |     |
|             |               |                          |           |     |     |
| Beneficiary | Inspirational | Inspirational            | exclude   |     |     |
| Beneficiary | Inspirational | Spiritual and Ceremonial | include   |     |     |
| Beneficiary | Inspirational | Spiritual and Ceremonial | near      |     |     |
| Beneficiary | Inspirational | Spiritual and Ceremonial | exclude   |     |     |
| Beneficiary | Inspirational | Artists                  | include   |     |     |
| Beneficiary | Inspirational | Artists                  | near      |     |     |
|             |               |                          |           |     |     |
| Beneficiary | Inspirational | Artists                  | exclude   |     |     |
| Beneficiary | Learning      | Learning                 | include   |     |     |
| Beneficiary | Learning      | Learning                 | near      |     |     |
| Beneficiary | Learning      | Learning                 | exclude   |     |     |
| Beneficiary | Learning      | Educators and Students   | include   |     |     |

| Category    | Class    | SubClass                         | Word_type | S1                                                                                                                                                                                                                                                                                                                                                                                                                                                            |
|-------------|----------|----------------------------------|-----------|---------------------------------------------------------------------------------------------------------------------------------------------------------------------------------------------------------------------------------------------------------------------------------------------------------------------------------------------------------------------------------------------------------------------------------------------------------------|
| Beneficiary | Learning | Educators and Stude              | near      |                                                                                                                                                                                                                                                                                                                                                                                                                                                               |
| Beneficiary | Learning | Educators and Stude              | exclude   | educational.*seminar grf educat.*center educat.*plan                                                                                                                                                                                                                                                                                                                                                                                                          |
| Beneficiary | Learning | Researchers                      | include   | research scien specimen.*collect sample.*collect data.*collect collect.*specimen collect.*sample collect.*data gather.*data data.*gather<br>promote promotion opportunit encourag accomodat attract interest initiative potential purpose permit improve.*knowledge enhance.*knowledge knowledge<br>*improve knowledge.*enhance improve.*learn enhance.*learn learn.*improve learn.*enhance permission engage visit excellent estuarine lab natural lab field |
| Beneficiary | Learning | Researchers                      | near      | lab marine lab enhanc.*understand promoting enhancing                                                                                                                                                                                                                                                                                                                                                                                                         |
| Beneficiary | Learning | Researchers                      | exclude   | Marine Protection, Research, and Sanctuaries Act MPRSA Research Reserve scientific name                                                                                                                                                                                                                                                                                                                                                                       |
| Beneficiary | Non-Use  | Non-Use                          | include   | non-use nonuse non use                                                                                                                                                                                                                                                                                                                                                                                                                                        |
| Beneficiary | Non-Use  | Non-Use                          | near      | resource opportunit valu                                                                                                                                                                                                                                                                                                                                                                                                                                      |
| Beneficiary | Non-Use  | Non-Use                          | exclude   |                                                                                                                                                                                                                                                                                                                                                                                                                                                               |
| Beneficiary | Non-Use  | People Who Care (Ex              | include   | care caring conserv appreciat unique endangered threatened                                                                                                                                                                                                                                                                                                                                                                                                    |
| Beneficiary | Non-Use  | People Who Care (Ex              | near      |                                                                                                                                                                                                                                                                                                                                                                                                                                                               |
| Beneficiary | Non-Use  | People Who Care (Ex              | exclude   | careful carex carey personal care careo caren aquarium care lawn care caret                                                                                                                                                                                                                                                                                                                                                                                   |
| Beneficiary | Non-Use  | People Who Care (Option_Bequest) | include   | bequest option value steward landtrust land trust inheritance trust sustainable sustainability                                                                                                                                                                                                                                                                                                                                                                |
| Beneficiary | Non-Use  | People Who Care (Option_Bequest) | near      |                                                                                                                                                                                                                                                                                                                                                                                                                                                               |
| Beneficiary | Non-Use  | People Who Care (Option_Bequest) | exclude   |                                                                                                                                                                                                                                                                                                                                                                                                                                                               |
| Beneficiary | Humanity | All Humans                       | include   | humanity everyone humankind all ages all people                                                                                                                                                                                                                                                                                                                                                                                                               |
| Beneficiary | Humanity | All Humans                       | near      |                                                                                                                                                                                                                                                                                                                                                                                                                                                               |
| Beneficiary | Humanity | All Humans                       | exclude   | activit                                                                                                                                                                                                                                                                                                                                                                                                                                                       |

| Category    | Class    | SubClass                         | Word_type | S2                                                                                                                                                                                                          | S3                                                                                                                                                                                                                                                                                                                                                                                                                                                                                                                                                                                                                                                                                                                                                                                                                                                                                                                      |
|-------------|----------|----------------------------------|-----------|-------------------------------------------------------------------------------------------------------------------------------------------------------------------------------------------------------------|-------------------------------------------------------------------------------------------------------------------------------------------------------------------------------------------------------------------------------------------------------------------------------------------------------------------------------------------------------------------------------------------------------------------------------------------------------------------------------------------------------------------------------------------------------------------------------------------------------------------------------------------------------------------------------------------------------------------------------------------------------------------------------------------------------------------------------------------------------------------------------------------------------------------------|
| Beneficiary | Learning | Educators and Stude              | near      |                                                                                                                                                                                                             |                                                                                                                                                                                                                                                                                                                                                                                                                                                                                                                                                                                                                                                                                                                                                                                                                                                                                                                         |
| Beneficiary | Learning | Educators and Stude              | exclude   |                                                                                                                                                                                                             |                                                                                                                                                                                                                                                                                                                                                                                                                                                                                                                                                                                                                                                                                                                                                                                                                                                                                                                         |
| Beneficiary | Learning | Researchers                      | include   | research lab visiting scientist postdoc post-doc graduate student graduate research                                                                                                                         | research.*use use.*research use.*scien scien.*use support.*research enable.*research enabling.*research for research scientific.*resource resource.*scientific                                                                                                                                                                                                                                                                                                                                                                                                                                                                                                                                                                                                                                                                                                                                                          |
| Beneficiary | Learning | Researchers                      | near      |                                                                                                                                                                                                             |                                                                                                                                                                                                                                                                                                                                                                                                                                                                                                                                                                                                                                                                                                                                                                                                                                                                                                                         |
| Beneficiary | Learning | Researchers                      | exclude   |                                                                                                                                                                                                             | house scientific name                                                                                                                                                                                                                                                                                                                                                                                                                                                                                                                                                                                                                                                                                                                                                                                                                                                                                                   |
| Beneficiary | Non-Use  | Non-Use                          | include   |                                                                                                                                                                                                             |                                                                                                                                                                                                                                                                                                                                                                                                                                                                                                                                                                                                                                                                                                                                                                                                                                                                                                                         |
| Beneficiary | Non-Use  | Non-Use                          | near      |                                                                                                                                                                                                             |                                                                                                                                                                                                                                                                                                                                                                                                                                                                                                                                                                                                                                                                                                                                                                                                                                                                                                                         |
| Beneficiary | Non-Use  | Non-Use                          | exclude   |                                                                                                                                                                                                             |                                                                                                                                                                                                                                                                                                                                                                                                                                                                                                                                                                                                                                                                                                                                                                                                                                                                                                                         |
| Beneficiary | Non-Use  | People Who Care (Ex              | include   | species of concern species of special concern endangered species threatened species ecologically sensitive environmentally sensitive sensitive ecosystem sensitive aquatic sensitive area sensitive species | rare protect critical                                                                                                                                                                                                                                                                                                                                                                                                                                                                                                                                                                                                                                                                                                                                                                                                                                                                                                   |
| Beneficiary | Non-Use  | People Who Care (Ex near         |           |                                                                                                                                                                                                             | organism vertebrate invertebrate species animal bird fauna flora plant wildlife raptor fauna animal mammal wildlife bird owl fowl duck sparrow warbler pl. over falcon osprey hawk eagle pelican geese pidgeon pigeon turtle tortoise seal whale dolphin porpoise manatee otter coral dragonfl insect beetle entomol o bug deer turkey quail waterfowl duck goose reptile alligator amphibian sala mander frog toad skink bat nutria raccoon hogs rabbit beaver rookery rookeri es butter horseshoe<br>crab flora plant flower root grass kelp seaweed vegetation mangrove reed cy press sphagnum cattail moss palm berry berries seeds fruit nuts tree sedge  moss lichen forest pine oak cypress elm <br>ash maple hickory hardwood cedar habitat ecosystem environment natur estu ar bay ecological aquatic marine water park coast shore land wetland the reserve floodplain biological basin region area watershed |
| Beneficiary | Non-Use  | People Who Care (Ex exclude      |           |                                                                                                                                                                                                             | rarely hazard.*protect protect.*hazard flood.*protect storm.*protect shoreline.*protect coastal.*protect dune.*protect wave.*protect erosion.*protect protect.* flood protect.*storm protect.*shoreline protect.*coastal protect.*dune protect.*wave protect.*erosion protect public health protect public safety toad flax                                                                                                                                                                                                                                                                                                                                                                                                                                                                                                                                                                                             |
| Beneficiary | Non-Use  | People Who Care (Option_Bequest) | include   | future next                                                                                                                                                                                                 | intergeneration inter-generation grandchildren grand-children                                                                                                                                                                                                                                                                                                                                                                                                                                                                                                                                                                                                                                                                                                                                                                                                                                                           |
| Beneficiary | Non-Use  | People Who Care (Option_Bequest) | near      | generation                                                                                                                                                                                                  |                                                                                                                                                                                                                                                                                                                                                                                                                                                                                                                                                                                                                                                                                                                                                                                                                                                                                                                         |
| Beneficiary | Non-Use  | People Who Care (Option_Bequest) | exclude   | power electric                                                                                                                                                                                              |                                                                                                                                                                                                                                                                                                                                                                                                                                                                                                                                                                                                                                                                                                                                                                                                                                                                                                                         |
| Beneficiary | Humanity | All Humans                       | include   | quality of life public health human health wellbeing well being well-being general health general welfare                                                                                                   | safe                                                                                                                                                                                                                                                                                                                                                                                                                                                                                                                                                                                                                                                                                                                                                                                                                                                                                                                    |
| Beneficiary | Humanity | All Humans                       | near      |                                                                                                                                                                                                             |                                                                                                                                                                                                                                                                                                                                                                                                                                                                                                                                                                                                                                                                                                                                                                                                                                                                                                                         |
| Beneficiary | Humanity | All Humans                       | exclude   | department of public health public health department                                                                                                                                                        | boat safeguard pilot harbor port vessel ship maritime safety hunter safety wildlife safety hunting safety                                                                                                                                                                                                                                                                                                                                                                                                                                                                                                                                                                                                                                                                                                                                                                                                               |

| Category    | Class    | SubClass                         | Word_type | S4                                                                                                                                                                                                                                                                           | S5 |
|-------------|----------|----------------------------------|-----------|------------------------------------------------------------------------------------------------------------------------------------------------------------------------------------------------------------------------------------------------------------------------------|----|
| Beneficiary | Learning | Educators and Stude              | near      |                                                                                                                                                                                                                                                                              |    |
| Beneficiary | Learning | Educators and Stude              | exclude   |                                                                                                                                                                                                                                                                              |    |
| Beneficiary | Learning | Researchers                      | include   |                                                                                                                                                                                                                                                                              |    |
| Beneficiary | Learning | Researchers                      | near      |                                                                                                                                                                                                                                                                              |    |
| Beneficiary | Learning | Researchers                      | exclude   |                                                                                                                                                                                                                                                                              |    |
| Beneficiary | Non-Use  | Non-Use                          | include   |                                                                                                                                                                                                                                                                              |    |
| Beneficiary | Non-Use  | Non-Use                          | near      |                                                                                                                                                                                                                                                                              |    |
| Beneficiary | Non-Use  | Non-Use                          | exclude   |                                                                                                                                                                                                                                                                              |    |
| Beneficiary | Non-Use  | People Who Care (Ex              | include   | existence value   right to exist                                                                                                                                                                                                                                             |    |
| Beneficiary | Non-Use  | People Who Care (Ex              | near      |                                                                                                                                                                                                                                                                              |    |
| Beneficiary | Non-Use  | People Who Care (Ex              | exclude   |                                                                                                                                                                                                                                                                              |    |
| Beneficiary | Non-Use  | People Who Care (Option_Bequest) | include   | future   heritage   legacy   inherit                                                                                                                                                                                                                                         |    |
| Beneficiary | Non-Use  | People Who Care (Option_Bequest) | near      | enjoy   preserv   conserv   invest   protect   significan   value   valuable   valuing   importan<br>t   vital   resource   need   coast   estuar   bay   lands   nature   natural   wild   the area   the<br>region   our area   our region   the watershed   our watershed |    |
| Beneficiary | Non-Use  | People Who Care (Option_Bequest) | exclude   | temperature value   biomass value   the regional                                                                                                                                                                                                                             |    |
| Beneficiary | Humanity | All Humans                       | include   |                                                                                                                                                                                                                                                                              |    |
| Beneficiary | Humanity | All Humans                       | near      |                                                                                                                                                                                                                                                                              |    |
| Beneficiary | Humanity | All Humans                       | exclude   |                                                                                                                                                                                                                                                                              |    |

| Category    | Class    | SubClass                         | Word_type | S6 | S7 |
|-------------|----------|----------------------------------|-----------|----|----|
| Beneficiary | Learning | Educators and Stude              | near      |    |    |
| Beneficiary | Learning | Educators and Stude              | exclude   |    |    |
| Beneficiary | Learning | Researchers                      | include   |    |    |
| Beneficiary | Learning | Researchers                      | near      |    |    |
| Beneficiary | Learning | Researchers                      | exclude   |    |    |
| Beneficiary | Non-Use  | Non-Use                          | include   |    |    |
| Beneficiary | Non-Use  | Non-Use                          | near      |    |    |
| Beneficiary | Non-Use  | Non-Use                          | exclude   |    |    |
| Beneficiary | Non-Use  | People Who Care (Ex              | include   |    |    |
| Beneficiary | Non-Use  | People Who Care (Ex              | near      |    |    |
| Beneficiary | Non-Use  | People Who Care (Ex              | exclude   |    |    |
| Beneficiary | Non-Use  | People Who Care (Option_Bequest) | include   |    |    |
| Beneficiary | Non-Use  | People Who Care (Option_Bequest) | near      |    |    |
| Beneficiary | Non-Use  | People Who Care (Option_Bequest) | exclude   |    |    |
| Beneficiary | Humanity | All Humans                       | include   |    |    |
| Beneficiary | Humanity | All Humans                       | near      |    |    |
| Beneficiary | Humanity | All Humans                       | exclude   |    |    |

| Category    | Class    | SubClass                         | Word_type | S8 | S9 |
|-------------|----------|----------------------------------|-----------|----|----|
| Beneficiary | Learning | Educators and Stude near         |           |    |    |
| Beneficiary | Learning | Educators and Stude exclude      |           |    |    |
| Beneficiary | Learning | Researchers                      | include   |    |    |
| Beneficiary | Learning | Researchers                      | near      |    |    |
| Beneficiary | Learning | Researchers                      | exclude   |    |    |
| Beneficiary | Non-Use  | Non-Use                          | include   |    |    |
| Beneficiary | Non-Use  | Non-Use                          | near      |    |    |
| Beneficiary | Non-Use  | Non-Use                          | exclude   |    |    |
| Beneficiary | Non-Use  | People Who Care (Ex              | include   |    |    |
| Beneficiary | Non-Use  |                                  |           |    |    |
| Beneficiary | Non-Use  | People Who Care (Ex              | near      |    |    |
| Beneficiary | Non-Use  | People Who Care (Ex              | exclude   |    |    |
| Beneficiary | Non-Use  | People Who Care (Option_Bequest) | include   |    |    |
| Beneficiary | Non-Use  | People Who Care (Option_Bequest) | near      |    |    |
| Beneficiary | Non-Use  | People Who Care (Option_Bequest) | exclude   |    |    |
| Beneficiary | Humanity | All Humans                       | include   |    |    |
| Beneficiary | Humanity | All Humans                       | near      |    |    |
| Beneficiary | Humanity | All Humans                       | exclude   |    |    |

| Category    | Class    | SubClass                         | Word_type | S10 | S11 |
|-------------|----------|----------------------------------|-----------|-----|-----|
| Beneficiary | Learning | Educators and Stude              | near      |     |     |
| Beneficiary | Learning | Educators and Stude              | exclude   |     |     |
| Beneficiary | Learning | Researchers                      | include   |     |     |
| Beneficiary | Learning | Researchers                      | near      |     |     |
| Beneficiary | Learning | Researchers                      | exclude   |     |     |
| Beneficiary | Non-Use  | Non-Use                          | include   |     |     |
| Beneficiary | Non-Use  | Non-Use                          | near      |     |     |
| Beneficiary | Non-Use  | Non-Use                          | exclude   |     |     |
| Beneficiary | Non-Use  | People Who Care (Ex              | include   |     |     |
| Beneficiary | Non-Use  | People Who Care (Ex              | near      |     |     |
| Beneficiary | Non-Use  | People Who Care (Ex              | exclude   |     |     |
| Beneficiary | Non-Use  | People Who Care (Option_Bequest) | include   |     |     |
| Beneficiary | Non-Use  | People Who Care (Option_Bequest) | near      |     |     |
| Beneficiary | Non-Use  | People Who Care (Option_Bequest) | exclude   |     |     |
| Beneficiary | Humanity | All Humans                       | include   |     |     |
| Beneficiary | Humanity | All Humans                       | near      |     |     |
| Beneficiary | Humanity | All Humans                       | exclude   |     |     |

| Category    | Class    | SubClass                         | Word_type | S12 | S13 |
|-------------|----------|----------------------------------|-----------|-----|-----|
| Beneficiary | Learning | Educators and Stude              | near      |     |     |
| Beneficiary | Learning | Educators and Stude              | exclude   |     |     |
| Beneficiary | Learning | Researchers                      | include   |     |     |
| Beneficiary | Learning | Researchers                      | near      |     |     |
| Beneficiary | Learning | Researchers                      | exclude   |     |     |
| Beneficiary | Non-Use  | Non-Use                          | include   |     |     |
| Beneficiary | Non-Use  | Non-Use                          | near      |     |     |
| Beneficiary | Non-Use  | Non-Use                          | exclude   |     |     |
| Beneficiary | Non-Use  | People Who Care (Ex              | include   |     |     |
| Beneficiary | Non-Use  | People Who Care (Ex              | near      |     |     |
| Beneficiary | Non-Use  | People Who Care (Ex              | exclude   |     |     |
| Beneficiary | Non-Use  | People Who Care (Option_Bequest) | include   |     |     |
| Beneficiary | Non-Use  | People Who Care (Option_Bequest) | near      |     |     |
| Beneficiary | Non-Use  | People Who Care (Option_Bequest) | exclude   |     |     |
| Beneficiary | Humanity | All Humans                       | include   |     |     |
| Beneficiary | Humanity | All Humans                       | near      |     |     |
| Beneficiary | Humanity | All Humans                       | exclude   |     |     |

| Category    | Class       | SubClass             | Word_type | S1                                                                                                                                                                                          |
|-------------|-------------|----------------------|-----------|---------------------------------------------------------------------------------------------------------------------------------------------------------------------------------------------|
| Environment | Environment | Environment          | include   | vegetation nature natural habitat the reserve the sound open space                                                                                                                          |
| Environment | Environment | Environment          | near      |                                                                                                                                                                                             |
| Environment | Environment | Environment          | exclude   | aquatic terrestrial river stream wetland lake pond estuar marine ocean grass scrub shrub forest agricult agro tundra greenspace marsh swamp tidal SAV riparian                              |
| Environment | Aquatic     | Aquatic              | include   | aquatic                                                                                                                                                                                     |
| Environment | Aquatic     | Aquatic              | near      |                                                                                                                                                                                             |
| Environment | Aquatic     | Aquatic              | exclude   | aquaticus river stream bay wetland marsh mangrove estuary groundwater ocean pond reservoir                                                                                                  |
| Environment | Aquatic     | Rivers and Streams   | include   | river creek canal stream channel riparian                                                                                                                                                   |
| Environment | Aquatic     | Rivers and Streams   | exclude   | streamline bloodstream driver                                                                                                                                                               |
| Environment | Aquatic     | Wetlands             | include   | wetland bog floodplain depression marsh swamp slough                                                                                                                                        |
| Environment | Aquatic     | Wetlands             | exclude   | patbogen marshfield marshall                                                                                                                                                                |
| Environment | Aquatic     | Lakes and Ponds      | include   | lake                                                                                                                                                                                        |
| Environment | Aquatic     | Lakes and Ponds      | near      |                                                                                                                                                                                             |
| Environment | Aquatic     | Lakes and Ponds      | exclude   | lakeville lake.*national                                                                                                                                                                    |
| Environment | Aquatic     | Estuaries and Near C | include   | estuar gulf puget sound bay                                                                                                                                                                 |
| Environment | Aquatic     | Estuaries and Near C | near      |                                                                                                                                                                                             |
| Environment | Aquatic     | Estuaries and Near C | exclude   | embayment                                                                                                                                                                                   |
| Environment | Aquatic     | Open Oceans and Se   | include   | ocean open water continental shelf deep water                                                                                                                                               |
| Environment | Aquatic     | Open Oceans and Se   | exclude   | www oceanography http open.*space ocean.*council open.*marsh animal national.*oceanic ocean.*plan ocean.*city ocean.*park legend ocean.*county ocean.*act open.*watershed ocean.*commission |
| Environment | Aquatic     | Groundwater          | include   | groundwater ground-water ground water                                                                                                                                                       |
| Environment | Aquatic     | Groundwater          | exclude   | protection.*act action                                                                                                                                                                      |
| Environment | Terrestrial | Terrestrial          | include   | terrestrial upland island shell.*mound shell.*midden mountain meadow volcano                                                                                                                |
| Environment | Terrestrial | Terrestrial          | near      |                                                                                                                                                                                             |

| Category    | Class       | SubClass             | Word_type | S2                                                                                                                                                                                           | S3                                                                                                                                                    |
|-------------|-------------|----------------------|-----------|----------------------------------------------------------------------------------------------------------------------------------------------------------------------------------------------|-------------------------------------------------------------------------------------------------------------------------------------------------------|
| Environment | Environment | Environment          | include   | environment ecosystem outdoor                                                                                                                                                                | flora fauna species wildlife watershed                                                                                                                |
| Environment | Environment | Environment          | near      |                                                                                                                                                                                              |                                                                                                                                                       |
| Environment | Environment | Environment          | exclude   | outdoor.*plan ecosystem.*plan aquatic terrestrial river stream wetland lake pond estuar marine ocean grass scrub shrub forest agricult agro tundra greenspace marsh swamp tidal SAV riparian | aquatic terrestrial river stream wetland lake pond estuar marine ocean grass scrub shrub forest agricult agro tundra greenspace marsh swamp tidal SAV |
| Environment | Aquatic     | Aquatic              | include   | water                                                                                                                                                                                        | benthic                                                                                                                                               |
| Environment | Aquatic     | Aquatic              | near      |                                                                                                                                                                                              |                                                                                                                                                       |
| Environment | Aquatic     | Aquatic              | exclude   | watershed freewater river stream bay wetland marsh mangrove estuary groundwater ocean pond reservoir                                                                                         |                                                                                                                                                       |
| Environment | Aquatic     | Rivers and Streams   | include   |                                                                                                                                                                                              |                                                                                                                                                       |
| Environment | Aquatic     | Rivers and Streams   | exclude   |                                                                                                                                                                                              |                                                                                                                                                       |
| Environment | Aquatic     | Wetlands             | include   | rush fen sedge fen shrub fen marsh hay salt hay                                                                                                                                              |                                                                                                                                                       |
| Environment | Aquatic     | Wetlands             | exclude   |                                                                                                                                                                                              |                                                                                                                                                       |
| Environment | Aquatic     | Lakes and Ponds      | include   | pond                                                                                                                                                                                         | reservoir                                                                                                                                             |
| Environment | Aquatic     | Lakes and Ponds      | near      |                                                                                                                                                                                              |                                                                                                                                                       |
| Environment | Aquatic     | Lakes and Ponds      | exclude   | ponder respond pondweed pond.*turtle mill.*pond transpond                                                                                                                                    |                                                                                                                                                       |
| Environment | Aquatic     | Estuaries and Near C | include   | tidal tide                                                                                                                                                                                   | coral reef artificial.*reef shipwreck                                                                                                                 |
| Environment | Aquatic     | Estuaries and Near C | near      |                                                                                                                                                                                              |                                                                                                                                                       |
| Environment | Aquatic     | Estuaries and Near C | exclude   | brown tide red tide browntide redtide                                                                                                                                                        | treefrog                                                                                                                                              |
| Environment | Aquatic     | Open Oceans and Se   | include   | sea                                                                                                                                                                                          | kelp.*forest                                                                                                                                          |
| Environment | Aquatic     | Open Oceans and Se   | exclude   | disease search season level seagrass grant seal research seablite sea.*grass rostrate seapurslane seabeach seabrook seam seat seattle sea oat                                                |                                                                                                                                                       |
| Environment | Aquatic     | Groundwater          | include   | aquifer                                                                                                                                                                                      | geyser                                                                                                                                                |
| Environment | Aquatic     | Groundwater          | exclude   |                                                                                                                                                                                              |                                                                                                                                                       |
| Environment | Terrestrial | Terrestrial          | include   | land                                                                                                                                                                                         | plant                                                                                                                                                 |
| Environment | Terrestrial | Terrestrial          | near      |                                                                                                                                                                                              |                                                                                                                                                       |

| Category    | Class       | SubClass             | Word_type | S4                                                                                                                                                                                                                                                                                                                                                                        | S5                                                                                                                                                                                                             |
|-------------|-------------|----------------------|-----------|---------------------------------------------------------------------------------------------------------------------------------------------------------------------------------------------------------------------------------------------------------------------------------------------------------------------------------------------------------------------------|----------------------------------------------------------------------------------------------------------------------------------------------------------------------------------------------------------------|
| Environment | Environment | Environment          | include   | resource value valuable trading mitigat goods econom public access conserv protect tourism tourist recreation livelihood visitor use stewards benefit                                                                                                                                                                                                                     | beneficial use living resource natural feature natural resource ecosystem service ecological service economic use commercial use recreational use cultural.*resource traditional use sustainable tourism       |
| Environment | Environment | Environment          | near      | ecosystem environment natur renewable ecological the reserve biological the region our region the area our area                                                                                                                                                                                                                                                           |                                                                                                                                                                                                                |
| Environment | Environment | Environment          | exclude   | Department sewer service office division commission bay scallop lander landing landmark southland parking parker economical protection agency environmentally temperature value biomass value the regional aquatic terrestrial river stream wetland lake pond estuar marine ocean grass scrub shrub forest agricult agro tundra greenspace marsh swamp tidal SAV riparian | department aquatic terrestrial river stream wetland lake pond estuar marine ocean grass scrub shrub forest agricult agro tundra greenspace marsh swamp tidal SAV riparian                                      |
| Environment | Aquatic     | Aquatic              | include   | TMDL pollution discharg effluent hydro emission                                                                                                                                                                                                                                                                                                                           | fish seahorse aquaria aquarium seafood salmon oyster pike crab lobster mullet mussel bass herring grouper snapper alewife flounder abalone scallop clam geoduck shrimp tarpon shellfish angler angling mollusk |
| Environment | Aquatic     | Aquatic              | near      | water marina boat ship                                                                                                                                                                                                                                                                                                                                                    |                                                                                                                                                                                                                |
| Environment | Aquatic     | Aquatic              | exclude   | river stream bay wetland marsh mangrove estuary groundwater ocean pond reservoir                                                                                                                                                                                                                                                                                          | spike clami pickerel oyster creek dangl rangl sangl tangl bangl wangl river stream bay wetland marsh mangrove estuary groundwater ocean pond reservoir                                                         |
| Environment | Aquatic     | Rivers and Streams   | include   |                                                                                                                                                                                                                                                                                                                                                                           |                                                                                                                                                                                                                |
| Environment | Aquatic     | Rivers and Streams   | exclude   |                                                                                                                                                                                                                                                                                                                                                                           |                                                                                                                                                                                                                |
| Environment | Aquatic     | Wetlands             | include   |                                                                                                                                                                                                                                                                                                                                                                           |                                                                                                                                                                                                                |
| Environment | Aquatic     | Wetlands             | exclude   |                                                                                                                                                                                                                                                                                                                                                                           |                                                                                                                                                                                                                |
| Environment | Aquatic     | Lakes and Ponds      | include   | vernal.*pool pool.*vernal temporary.*pool pool.*temporary                                                                                                                                                                                                                                                                                                                 | quarry                                                                                                                                                                                                         |
| Environment | Aquatic     | Lakes and Ponds      | near      |                                                                                                                                                                                                                                                                                                                                                                           | water flood                                                                                                                                                                                                    |
| Environment | Aquatic     | Lakes and Ponds      | exclude   |                                                                                                                                                                                                                                                                                                                                                                           |                                                                                                                                                                                                                |
| Environment | Aquatic     | Estuaries and Near C | include   | seagrass eelgrass oyster.*grass sea.*grass eel.*grass mangrove SAV                                                                                                                                                                                                                                                                                                        | lagoon delta mudflat mud.*flat                                                                                                                                                                                 |
| Environment | Aquatic     | Estuaries and Near C | near      |                                                                                                                                                                                                                                                                                                                                                                           |                                                                                                                                                                                                                |
| Environment | Aquatic     | Estuaries and Near C | exclude   | save saving savanna                                                                                                                                                                                                                                                                                                                                                       |                                                                                                                                                                                                                |
| Environment | Aquatic     | Open Oceans and Se   | include   | marine                                                                                                                                                                                                                                                                                                                                                                    |                                                                                                                                                                                                                |
| Environment | Aquatic     | Open Oceans and Se   | exclude   |                                                                                                                                                                                                                                                                                                                                                                           |                                                                                                                                                                                                                |
| Environment | Aquatic     | Groundwater          | include   | underground.*reservoir reservoir.*underground underground.*water water.*underground                                                                                                                                                                                                                                                                                       |                                                                                                                                                                                                                |
| Environment | Aquatic     | Groundwater          | exclude   |                                                                                                                                                                                                                                                                                                                                                                           |                                                                                                                                                                                                                |
| Environment | Terrestrial | Terrestrial          | include   | flower sediment soil grass fungi fungus                                                                                                                                                                                                                                                                                                                                   | terrestrial the area the region our region our area the watershed our watershed                                                                                                                                |
| Environment | Terrestrial | Terrestrial          | near      |                                                                                                                                                                                                                                                                                                                                                                           |                                                                                                                                                                                                                |

| Category    | Class       | SubClass                   | Word_type | S6                                                                                                                                                | S7                                                                                                                                                                                           |
|-------------|-------------|----------------------------|-----------|---------------------------------------------------------------------------------------------------------------------------------------------------|----------------------------------------------------------------------------------------------------------------------------------------------------------------------------------------------|
| Environment | Environment | Environment                | include   |                                                                                                                                                   |                                                                                                                                                                                              |
| Environment | Environment | Environment                | near      |                                                                                                                                                   |                                                                                                                                                                                              |
| Environment | Environment | Environment                | exclude   |                                                                                                                                                   |                                                                                                                                                                                              |
| Environment | Aquatic     | Aquatic                    | include   | game hunting hunts hunter                                                                                                                         | water recreation discharge enjoy moor charter tours cruise port harbor access traffic channel canal launch                                                                                   |
| Environment | Aquatic     | Aquatic                    | near      | duck waterfowl goose alligator                                                                                                                    | boat ship vessel ferry paddle<br>fish stewardship partnership waterfowl ownership relationship leadership sponsorship township membership shipped ship nship support harbor seal new bedford |
| Environment | Aquatic     | Aquatic                    | exclude   | shunt huntley huntington transport scavenger<br>hunt river stream bay wetland marsh mangrove estuary groundwater ocean hunts point pond reservoir | harbor bight river stream bay wetland marsh mangrove estuary groundwater ocean pond reservoir                                                                                                |
| Environment | Aquatic     | Rivers and Streams         | include   |                                                                                                                                                   |                                                                                                                                                                                              |
| Environment | Aquatic     | Rivers and Streams         | exclude   |                                                                                                                                                   |                                                                                                                                                                                              |
| Environment | Aquatic     | Wetlands                   | include   |                                                                                                                                                   |                                                                                                                                                                                              |
| Environment | Aquatic     | Wetlands                   | exclude   |                                                                                                                                                   |                                                                                                                                                                                              |
| Environment | Aquatic     | Lakes and Ponds            | include   |                                                                                                                                                   |                                                                                                                                                                                              |
| Environment | Aquatic     | Lakes and Ponds            | near      |                                                                                                                                                   |                                                                                                                                                                                              |
| Environment | Aquatic     | Lakes and Ponds            | exclude   |                                                                                                                                                   |                                                                                                                                                                                              |
| Environment | Aquatic     | Estuaries and Near Coastal | include   | bay shore coast                                                                                                                                   | sunk                                                                                                                                                                                         |
| Environment | Aquatic     | Estuaries and Near Coastal | near      |                                                                                                                                                   | ship vessel barge                                                                                                                                                                            |
| Environment | Aquatic     | Estuaries and Near Coastal | exclude   | embayment loblolly.*bay coastal.*count coastal.*city coastal.*cities coastal community                                                            |                                                                                                                                                                                              |
| Environment | Aquatic     | Open Oceans and Seas       | include   |                                                                                                                                                   |                                                                                                                                                                                              |
| Environment | Aquatic     | Open Oceans and Seas       | exclude   |                                                                                                                                                   |                                                                                                                                                                                              |
| Environment | Aquatic     | Groundwater                | include   |                                                                                                                                                   |                                                                                                                                                                                              |
| Environment | Aquatic     | Groundwater                | exclude   |                                                                                                                                                   |                                                                                                                                                                                              |
| Environment | Terrestrial | Terrestrial                | include   | tree                                                                                                                                              | skin hide fur furs fur-bear fur bear furbear meat game                                                                                                                                       |
| Environment | Terrestrial | Terrestrial                | near      |                                                                                                                                                   | exploit hunt trap harvest company corporation trade                                                                                                                                          |

| Category    | Class       | SubClass             | Word_type | S8                                                                                                    | S9                                                                                                                                                                                                                                                                              |
|-------------|-------------|----------------------|-----------|-------------------------------------------------------------------------------------------------------|---------------------------------------------------------------------------------------------------------------------------------------------------------------------------------------------------------------------------------------------------------------------------------|
| Environment | Environment | Environment          | include   |                                                                                                       |                                                                                                                                                                                                                                                                                 |
| Environment | Environment | Environment          | near      |                                                                                                       |                                                                                                                                                                                                                                                                                 |
| Environment | Environment | Environment          | exclude   |                                                                                                       |                                                                                                                                                                                                                                                                                 |
| Environment | Aquatic     | Aquatic              | include   | watercraft sailboat tugboat jetski kayak canoe boating boater shipping channel                        | wildstock wild.*stock stock.*wild wild.*catch catch.*wild wild.*caught caught.*wild<br>fish seahorse aquaria aquarium seafood salmon shrimp oyster pike crab lobster mullet mussel bass herring grouper snapper alewife flounder abalone scallop clam geoduck lake river stream |
| Environment | Aquatic     | Aquatic              | near      |                                                                                                       |                                                                                                                                                                                                                                                                                 |
| Environment | Aquatic     | Aquatic              | exclude   | volcanoe river stream bay wetland marsh mangrove estuary groundwater ocean water ocean pond reservoir | livestock wildlife wild<br>animal spike clam river stream bay wetland marsh mangrove estuary ground                                                                                                                                                                             |
| Environment | Aquatic     | Rivers and Streams   | include   |                                                                                                       |                                                                                                                                                                                                                                                                                 |
| Environment | Aquatic     | Rivers and Streams   | exclude   |                                                                                                       |                                                                                                                                                                                                                                                                                 |
| Environment | Aquatic     | Wetlands             | include   |                                                                                                       |                                                                                                                                                                                                                                                                                 |
| Environment | Aquatic     | Wetlands             | exclude   |                                                                                                       |                                                                                                                                                                                                                                                                                 |
| Environment | Aquatic     | Lakes and Ponds      | include   |                                                                                                       |                                                                                                                                                                                                                                                                                 |
| Environment | Aquatic     | Lakes and Ponds      | near      |                                                                                                       |                                                                                                                                                                                                                                                                                 |
| Environment | Aquatic     | Lakes and Ponds      | exclude   |                                                                                                       |                                                                                                                                                                                                                                                                                 |
| Environment | Aquatic     | Estuaries and Near C | include   |                                                                                                       |                                                                                                                                                                                                                                                                                 |
| Environment | Aquatic     | Estuaries and Near C | near      |                                                                                                       |                                                                                                                                                                                                                                                                                 |
| Environment | Aquatic     | Estuaries and Near C | exclude   |                                                                                                       |                                                                                                                                                                                                                                                                                 |
| Environment | Aquatic     | Open Oceans and Se   | include   |                                                                                                       |                                                                                                                                                                                                                                                                                 |
| Environment | Aquatic     | Open Oceans and Se   | exclude   |                                                                                                       |                                                                                                                                                                                                                                                                                 |
| Environment | Aquatic     | Groundwater          | include   |                                                                                                       |                                                                                                                                                                                                                                                                                 |
| Environment | Aquatic     | Groundwater          | exclude   |                                                                                                       |                                                                                                                                                                                                                                                                                 |
| Environment | Terrestrial | Terrestrial          | include   |                                                                                                       |                                                                                                                                                                                                                                                                                 |
| Environment | Terrestrial | Terrestrial          | near      |                                                                                                       |                                                                                                                                                                                                                                                                                 |

| Category                | Class                | SubClass             | Word_type | S10 | S11 |
|-------------------------|----------------------|----------------------|-----------|-----|-----|
| Environment             | Environment          | Environment          | include   |     |     |
| Environment             | Environment          | Environment          | near      |     |     |
| Environment             | Environment          | Environment          | exclude   |     |     |
| Environment             | Aquatic              | Aquatic              | include   |     |     |
| Environment Aquatic     | Aquatic              | near                 |           |     |     |
| Environment Aquatic     | Aquatic              | exclude              |           |     |     |
| Environment             | Aquatic              | Rivers and Streams   | include   |     |     |
| Environment Aquatic     | Rivers and Streams   | exclude              |           |     |     |
| Environment             | Aquatic              | Wetlands             | include   |     |     |
| Environment Aquatic     | Wetlands             | exclude              |           |     |     |
| Environment             | Aquatic              | Lakes and Ponds      | include   |     |     |
| Environment Aquatic     | Lakes and Ponds      | near                 |           |     |     |
| Environment Aquatic     | Lakes and Ponds      | exclude              |           |     |     |
| Environment             | Aquatic              | Estuaries and Near C | include   |     |     |
| Environment Aquatic     | Estuaries and Near C | near                 |           |     |     |
| Environment Aquatic     | Estuaries and Near C | exclude              |           |     |     |
| Environment             | Aquatic              | Open Oceans and Se   | include   |     |     |
| Environment Aquatic     | Open Oceans and Se   | exclude              |           |     |     |
| Environment             | Aquatic              | Groundwater          | include   |     |     |
| Environment Aquatic     | Groundwater          | exclude              |           |     |     |
| Environment             | Terrestrial          | Terrestrial          | include   |     |     |
| Environment Terrestrial | Terrestrial          | near                 |           |     |     |

| Category                | Class                | SubClass             | Word_type | S12 | S13 |
|-------------------------|----------------------|----------------------|-----------|-----|-----|
| Environment             | Environment          | Environment          | include   |     |     |
| Environment             | Environment          | Environment          | near      |     |     |
| Environment             | Environment          | Environment          | exclude   |     |     |
| Environment             | Aquatic              | Aquatic              | include   |     |     |
| Environment Aquatic     | Aquatic              | near                 |           |     |     |
| Environment Aquatic     | Aquatic              | exclude              |           |     |     |
| Environment             | Aquatic              | Rivers and Streams   | include   |     |     |
| Environment Aquatic     | Rivers and Streams   | exclude              |           |     |     |
| Environment             | Aquatic              | Wetlands             | include   |     |     |
| Environment Aquatic     | Wetlands             | exclude              |           |     |     |
| Environment             | Aquatic              | Lakes and Ponds      | include   |     |     |
| Environment Aquatic     | Lakes and Ponds      | near                 |           |     |     |
| Environment Aquatic     | Lakes and Ponds      | exclude              |           |     |     |
| Environment             | Aquatic              | Estuaries and Near C | include   |     |     |
| Environment Aquatic     | Estuaries and Near C | near                 |           |     |     |
| Environment Aquatic     | Estuaries and Near C | exclude              |           |     |     |
| Environment             | Aquatic              | Open Oceans and Se   | include   |     |     |
| Environment Aquatic     | Open Oceans and Se   | exclude              |           |     |     |
| Environment             | Aquatic              | Groundwater          | include   |     |     |
| Environment Aquatic     | Groundwater          | exclude              |           |     |     |
| Environment             | Terrestrial          | Terrestrial          | include   |     |     |
| Environment Terrestrial | Terrestrial          | near                 |           |     |     |

| Category    | Class       | SubClass            | Word_type | S1                                                                                                                                                                                                                                                                                                                                                                                                                                                                                                                                                                                                                                                                                                                                                                                                   |
|-------------|-------------|---------------------|-----------|------------------------------------------------------------------------------------------------------------------------------------------------------------------------------------------------------------------------------------------------------------------------------------------------------------------------------------------------------------------------------------------------------------------------------------------------------------------------------------------------------------------------------------------------------------------------------------------------------------------------------------------------------------------------------------------------------------------------------------------------------------------------------------------------------|
| Environment | Terrestrial | Terrestrial         | exclude   | rhode.*island terrestrial.*species island.*sound grass scrub shrub forest agricult agro tundra greenspace                                                                                                                                                                                                                                                                                                                                                                                                                                                                                                                                                                                                                                                                                            |
| Environment | Terrestrial | Forests             | include   | forest                                                                                                                                                                                                                                                                                                                                                                                                                                                                                                                                                                                                                                                                                                                                                                                               |
| Environment | Terrestrial | Forests             | exclude   | laudholm vincent kelp.*forest                                                                                                                                                                                                                                                                                                                                                                                                                                                                                                                                                                                                                                                                                                                                                                        |
| Environment | Terrestrial | Agroecosystems      | include   | orchard vineyard                                                                                                                                                                                                                                                                                                                                                                                                                                                                                                                                                                                                                                                                                                                                                                                     |
| Environment | Terrestrial | Agroecosystems      | near      |                                                                                                                                                                                                                                                                                                                                                                                                                                                                                                                                                                                                                                                                                                                                                                                                      |
| Environment | Terrestrial | Agroecosystems      | exclude   | macrophy micropool close                                                                                                                                                                                                                                                                                                                                                                                                                                                                                                                                                                                                                                                                                                                                                                             |
| Environment | Terrestrial | Created Greenspace  | include   | park trail                                                                                                                                                                                                                                                                                                                                                                                                                                                                                                                                                                                                                                                                                                                                                                                           |
| Environment | Terrestrial | Created Greenspace  | near      |                                                                                                                                                                                                                                                                                                                                                                                                                                                                                                                                                                                                                                                                                                                                                                                                      |
| Environment | Terrestrial | Created Greenspace  | exclude   | spark parking parkway national.*park department.*park district.*park research.*park industrial.*park park.*service parkland trailer traillii                                                                                                                                                                                                                                                                                                                                                                                                                                                                                                                                                                                                                                                         |
| Environment | Terrestrial | Grasslands          | include   | prairie grassland                                                                                                                                                                                                                                                                                                                                                                                                                                                                                                                                                                                                                                                                                                                                                                                    |
| Environment | Terrestrial | Grasslands          | exclude   | grassflat crab grass shrimp grass frog grasshopper                                                                                                                                                                                                                                                                                                                                                                                                                                                                                                                                                                                                                                                                                                                                                   |
| Environment | Terrestrial | Scrublands_Shrublan | include   | sageland dune scrub shrub chaparral                                                                                                                                                                                                                                                                                                                                                                                                                                                                                                                                                                                                                                                                                                                                                                  |
| Environment | Terrestrial | Barren_Rock and Sar | include   | barren desert beach rock                                                                                                                                                                                                                                                                                                                                                                                                                                                                                                                                                                                                                                                                                                                                                                             |
| Environment | Terrestrial | Barren_Rock and Sar | near      |                                                                                                                                                                                                                                                                                                                                                                                                                                                                                                                                                                                                                                                                                                                                                                                                      |
| Environment | Terrestrial | Barren_Rock and Sar | exclude   | pine rockport rocky mountain gabion rockcress rockfish larock rock crab shamrock rock shrimp rock cancer intertidal rockport rockaway rocky Rock Cove rockingham bedrock rock fish rock jasmine rockport rockaway rocky Rock Cove sediment channel hammock legend dune management.*description report inventory list.*structure burnunit burn.*unit facilit forest.*manag gis document data spit transport site adverse bedrock honey bee clay creek clayton sandwich runoff sandwort sandine ersand sandy esand dsand sanddune sand dune sandspur sander ssand sandwort sandpiper sand filter esand dsand sand pine sandusky sand grass sandplain sandown thousand carex carey personal care careo careful aquarium care lawn care wood.*smoke sediment channel preservativ pah hab hazard highhigh |
| Environment | Terrestrial | Tundra              | include   | tundra                                                                                                                                                                                                                                                                                                                                                                                                                                                                                                                                                                                                                                                                                                                                                                                               |
| Environment | Terrestrial | Tundra              | exclude   | tundra vole tundra swan                                                                                                                                                                                                                                                                                                                                                                                                                                                                                                                                                                                                                                                                                                                                                                              |
| Environment | Terrestrial | Ice and Snow        | include   | glacier                                                                                                                                                                                                                                                                                                                                                                                                                                                                                                                                                                                                                                                                                                                                                                                              |

| Category    | Class       | SubClass            | Word_type | S2                                                                                                                                                                                                                                                                                                      | S3                                                                                                                                                                                                                                                                                                                                                                                                                                                               |
|-------------|-------------|---------------------|-----------|---------------------------------------------------------------------------------------------------------------------------------------------------------------------------------------------------------------------------------------------------------------------------------------------------------|------------------------------------------------------------------------------------------------------------------------------------------------------------------------------------------------------------------------------------------------------------------------------------------------------------------------------------------------------------------------------------------------------------------------------------------------------------------|
| Environment | Terrestrial | Terrestrial         | exclude   | island.*sound grass scrub shrub forest agricult agro tundra greenspace marsh swamp portland tideland wetland woodland lander southland landing landmark system.*land landbird landmark                                                                                                                  | industr business product commercial company factory processing treatment po wer sea ocean water aquatic wetland estuar marine river stream marsh plantation transplant                                                                                                                                                                                                                                                                                           |
| Environment | Terrestrial | Forests             | include   | wood                                                                                                                                                                                                                                                                                                    | pine oak cypress  elm  ash maple hickory hardwood cedar                                                                                                                                                                                                                                                                                                                                                                                                          |
| Environment | Terrestrial | Forests             | exclude   | park lakewood kirkwood woods hole wood dock wood preserv woodneck woodbury wood stake wooden woodbridge treated lumber treated wood wood stove woodii wood-lettuce wildwood woodpecker woodward wood duck woodrat woods snake wood stork woodcock woodfern sandalwoods wood satyr wood borer wood nymph | cash category sewage sanitary acquatic management.*area fish wash dnr mcb p trash shoreline pineda pinellas legend pine.*island vash elmer elm st ashe coal ash mash sash cash bash overwhelm oakdale oakley croak coal.*ash delmarva fashion barrier.*island water.*pollution soak pine.*beach over.*whelmed barrier.*beach ashore sand.*pine shorebird percent metals oakland silverside hash develm hairstreak crash ocean.*pine oak.*harbor oak.*ridge croak |
| Environment | Terrestrial | Agroecosystems      | include   | crops pasture hay cropland                                                                                                                                                                                                                                                                              | agroecosystem agro-ecosystem                                                                                                                                                                                                                                                                                                                                                                                                                                     |
| Environment | Terrestrial | Agroecosystems      | near      |                                                                                                                                                                                                                                                                                                         |                                                                                                                                                                                                                                                                                                                                                                                                                                                                  |
| Environment | Terrestrial | Agroecosystems      | exclude   | suhayda thayer macrophy micropool close haye hayhoe hayn haya marsh hay salt hay microp                                                                                                                                                                                                                 |                                                                                                                                                                                                                                                                                                                                                                                                                                                                  |
| Environment | Terrestrial | Created Greenspace  | include   | greenspace greenway green space green way garden green roof green infrastructure                                                                                                                                                                                                                        | airfield lawn golf yard airstrip runway.*air air.*runway                                                                                                                                                                                                                                                                                                                                                                                                         |
| Environment | Terrestrial | Created Greenspace  | near      |                                                                                                                                                                                                                                                                                                         |                                                                                                                                                                                                                                                                                                                                                                                                                                                                  |
| Environment | Terrestrial | Created Greenspace  | exclude   | shellfish garden oyster garden                                                                                                                                                                                                                                                                          | vineyard boatyard boat yard shipyard ship yard building yard schoolyard school yard                                                                                                                                                                                                                                                                                                                                                                              |
| Environment | Terrestrial | Grasslands          | include   |                                                                                                                                                                                                                                                                                                         |                                                                                                                                                                                                                                                                                                                                                                                                                                                                  |
| Environment | Terrestrial | Grasslands          | exclude   |                                                                                                                                                                                                                                                                                                         |                                                                                                                                                                                                                                                                                                                                                                                                                                                                  |
| Environment | Terrestrial | Scrublands_Shrublar | include   |                                                                                                                                                                                                                                                                                                         |                                                                                                                                                                                                                                                                                                                                                                                                                                                                  |
| Environment | Terrestrial | Barren_Rock and Sar | include   | sand                                                                                                                                                                                                                                                                                                    | mine mining                                                                                                                                                                                                                                                                                                                                                                                                                                                      |
| Environment | Terrestrial | Barren_Rock and Sar | near      |                                                                                                                                                                                                                                                                                                         | pit land area site                                                                                                                                                                                                                                                                                                                                                                                                                                               |
| Environment | Terrestrial | Barren_Rock and Sar | exclude   | sandwich runoff sandwort sandine ersand esand dsand sanddune sand dune sandspur sander sandy ssand sandwort sandpiper sand filter esand dsand sand pine sandusky sand grass sandplain sandown thousand sand plain sandplain metalsand sand lance sandalwood                                             | data.*min determining examining determine examine promine mineral flumine a shells minen mineu amine plaquemine ermin minello deter-min deter-min minea post-min division omine smine reclaim.*min min.*reclaim min.*reclam reclam.*min under- min lettuce                                                                                                                                                                                                       |
| Environment | Terrestrial | Tundra              | include   | alpine                                                                                                                                                                                                                                                                                                  |                                                                                                                                                                                                                                                                                                                                                                                                                                                                  |
| Environment | Terrestrial | Tundra              | exclude   | headwater alpine.*forest circae ssc alpine.*lake  NJ new jersey alpine mountain sorrel alpine hawk alpine forget alpine draba                                                                                                                                                                           |                                                                                                                                                                                                                                                                                                                                                                                                                                                                  |
| Environment | Terrestrial | Ice and Snow        | include   | snow                                                                                                                                                                                                                                                                                                    | ice                                                                                                                                                                                                                                                                                                                                                                                                                                                              |

| Category    | Class       | SubClass            | Word_type | S4                                                                                                                                                                                                     | S5                      |
|-------------|-------------|---------------------|-----------|--------------------------------------------------------------------------------------------------------------------------------------------------------------------------------------------------------|-------------------------|
| Environment | Terrestrial | Terrestrial         | exclude   | sea ocean water aquatic wetland estuar marine river stream marsh grassroot seagrass eelgrass oyster.*grass sea.*grass eel.*grass mangrove SAV soft sediment bay soft-sediment                          | the regional            |
| Environment | Terrestrial | Forests             | include   | pineland                                                                                                                                                                                               | tree.*stand stand.*tree |
| Environment | Terrestrial | Forests             | exclude   |                                                                                                                                                                                                        | street                  |
| Environment | Terrestrial | Agroecosystems      | include   | agricultur farm silvicultur                                                                                                                                                                            | plantation              |
| Environment | Terrestrial | Agroecosystems      | near      |                                                                                                                                                                                                        | sugar coffee            |
| Environment | Terrestrial | Agroecosystems      | exclude   | farm shellfish farm fish farm oyster farm clam farm mussel farm shrimp shellfish farm fish farm oyster farm clam farm mussel farm shrimp farm aqua farm farm market farmer.*market aquacultur aquafarm | transplant              |
| Environment | Terrestrial | Created Greenspace  | include   | field                                                                                                                                                                                                  |                         |
| Environment | Terrestrial | Created Greenspace  | near      | football soccer athletic baseball                                                                                                                                                                      |                         |
| Environment | Terrestrial | Created Greenspace  | exclude   |                                                                                                                                                                                                        |                         |
| Environment | Terrestrial | Grasslands          | include   |                                                                                                                                                                                                        |                         |
| Environment | Terrestrial | Grasslands          | exclude   |                                                                                                                                                                                                        |                         |
| Environment | Terrestrial | Scrublands_Shrublan | include   |                                                                                                                                                                                                        |                         |
| Environment | Terrestrial | Barren_Rock and Sar | include   | quarry                                                                                                                                                                                                 | limestone               |
| Environment | Terrestrial | Barren_Rock and Sar | near      |                                                                                                                                                                                                        |                         |
| Environment | Terrestrial | Barren_Rock and Sar | exclude   | flood water                                                                                                                                                                                            |                         |
| Environment | Terrestrial | Tundra              | include   |                                                                                                                                                                                                        |                         |
| Environment | Terrestrial | Tundra              | exclude   |                                                                                                                                                                                                        |                         |
| Environment | Terrestrial | Ice and Snow        | include   |                                                                                                                                                                                                        |                         |

| Category    | Class       | SubClass            | Word_type | S6               | S7                                                                                                                                                                                                                                                                                                                                                                                                                                                                                                                                                                                                                                                                                                                                                                                                                                                                                                                                                                                                                                                                                                                                   |
|-------------|-------------|---------------------|-----------|------------------|--------------------------------------------------------------------------------------------------------------------------------------------------------------------------------------------------------------------------------------------------------------------------------------------------------------------------------------------------------------------------------------------------------------------------------------------------------------------------------------------------------------------------------------------------------------------------------------------------------------------------------------------------------------------------------------------------------------------------------------------------------------------------------------------------------------------------------------------------------------------------------------------------------------------------------------------------------------------------------------------------------------------------------------------------------------------------------------------------------------------------------------|
|             |             |                     |           |                  | agency askin pickere! by-product byproduct by<br>product chid entrap strap trap.*gas gas.*trap sediment.*trap contam.*trap nut<br>rient.*trap pollut.*trap trap.*contam trap.*nutrient trap.*pollut sand.*trap trap<br>.*sand trap.*sediment litter trap fish<br>trap especial power.*generation electric.*generation generation<br>plant generation facilit laboratory observ field observ lab observ special<br>issue meadow beauty river beauty beautiful jacob spring<br>beauty beautyberry carex carey personal care careo aquarium care lawn<br>care careful exotic extrapolat askin pickere! invasive species iskin nuisance<br>species overview in view of over-view over-<br>view peltandra pelti pelto apelt peltu pelta pelte provid.* no clue provid.*<br>notice provid.* basis provid.*expertise rarely temperature value biomass<br>value nonprofit non-profit refur review bayview sensitive<br>fern shunt huntley huntington hunterdon sking saalem mysella economus new<br>market skink skin lesion skin condition strap sulfur specialist tradeoff trade-<br>off transport workshop duck waterfowl goose alligator |
| Environment | Terrestrial | Terrestrial         | exclude   | braintree street |                                                                                                                                                                                                                                                                                                                                                                                                                                                                                                                                                                                                                                                                                                                                                                                                                                                                                                                                                                                                                                                                                                                                      |
| Environment | Terrestrial | Forests             | include   |                  |                                                                                                                                                                                                                                                                                                                                                                                                                                                                                                                                                                                                                                                                                                                                                                                                                                                                                                                                                                                                                                                                                                                                      |
|             |             |                     |           |                  |                                                                                                                                                                                                                                                                                                                                                                                                                                                                                                                                                                                                                                                                                                                                                                                                                                                                                                                                                                                                                                                                                                                                      |
| Environment | Terrestrial | Forests             | exclude   |                  |                                                                                                                                                                                                                                                                                                                                                                                                                                                                                                                                                                                                                                                                                                                                                                                                                                                                                                                                                                                                                                                                                                                                      |
| Environment | Terrestrial | Agroecosystems      | include   |                  |                                                                                                                                                                                                                                                                                                                                                                                                                                                                                                                                                                                                                                                                                                                                                                                                                                                                                                                                                                                                                                                                                                                                      |
| Environment | Terrestrial | Agroecosystems      | near      |                  |                                                                                                                                                                                                                                                                                                                                                                                                                                                                                                                                                                                                                                                                                                                                                                                                                                                                                                                                                                                                                                                                                                                                      |
|             |             |                     |           |                  |                                                                                                                                                                                                                                                                                                                                                                                                                                                                                                                                                                                                                                                                                                                                                                                                                                                                                                                                                                                                                                                                                                                                      |
| Environment | Terrestrial | Agroecosystems      | exclude   |                  |                                                                                                                                                                                                                                                                                                                                                                                                                                                                                                                                                                                                                                                                                                                                                                                                                                                                                                                                                                                                                                                                                                                                      |
| Environment | Terrestrial | Created Greenspace  | include   |                  |                                                                                                                                                                                                                                                                                                                                                                                                                                                                                                                                                                                                                                                                                                                                                                                                                                                                                                                                                                                                                                                                                                                                      |
| Environment | Terrestrial | Created Greenspace  | near      |                  |                                                                                                                                                                                                                                                                                                                                                                                                                                                                                                                                                                                                                                                                                                                                                                                                                                                                                                                                                                                                                                                                                                                                      |
|             |             |                     |           |                  |                                                                                                                                                                                                                                                                                                                                                                                                                                                                                                                                                                                                                                                                                                                                                                                                                                                                                                                                                                                                                                                                                                                                      |
| Environment | Terrestrial | Created Greenspace  | exclude   |                  |                                                                                                                                                                                                                                                                                                                                                                                                                                                                                                                                                                                                                                                                                                                                                                                                                                                                                                                                                                                                                                                                                                                                      |
| Environment | Terrestrial | Grasslands          | include   |                  |                                                                                                                                                                                                                                                                                                                                                                                                                                                                                                                                                                                                                                                                                                                                                                                                                                                                                                                                                                                                                                                                                                                                      |
| Environment | Terrestrial | Grasslands          | exclude   |                  |                                                                                                                                                                                                                                                                                                                                                                                                                                                                                                                                                                                                                                                                                                                                                                                                                                                                                                                                                                                                                                                                                                                                      |
| Environment | Terrestrial | Scrublands_Shrublan | include   |                  |                                                                                                                                                                                                                                                                                                                                                                                                                                                                                                                                                                                                                                                                                                                                                                                                                                                                                                                                                                                                                                                                                                                                      |
| Environment | Terrestrial | Barren_Rock and Sar | include   |                  |                                                                                                                                                                                                                                                                                                                                                                                                                                                                                                                                                                                                                                                                                                                                                                                                                                                                                                                                                                                                                                                                                                                                      |
| Environment | Terrestrial | Barren_Rock and Sar | near      |                  |                                                                                                                                                                                                                                                                                                                                                                                                                                                                                                                                                                                                                                                                                                                                                                                                                                                                                                                                                                                                                                                                                                                                      |
|             |             |                     |           |                  |                                                                                                                                                                                                                                                                                                                                                                                                                                                                                                                                                                                                                                                                                                                                                                                                                                                                                                                                                                                                                                                                                                                                      |
| Environment | Terrestrial | Barren_Rock and Sar | exclude   |                  |                                                                                                                                                                                                                                                                                                                                                                                                                                                                                                                                                                                                                                                                                                                                                                                                                                                                                                                                                                                                                                                                                                                                      |
| Environment | Terrestrial | Tundra              | include   |                  |                                                                                                                                                                                                                                                                                                                                                                                                                                                                                                                                                                                                                                                                                                                                                                                                                                                                                                                                                                                                                                                                                                                                      |
|             |             |                     |           |                  |                                                                                                                                                                                                                                                                                                                                                                                                                                                                                                                                                                                                                                                                                                                                                                                                                                                                                                                                                                                                                                                                                                                                      |
| Environment | Terrestrial | Tundra              | exclude   |                  |                                                                                                                                                                                                                                                                                                                                                                                                                                                                                                                                                                                                                                                                                                                                                                                                                                                                                                                                                                                                                                                                                                                                      |
| Environment | Terrestrial | Ice and Snow        | include   |                  |                                                                                                                                                                                                                                                                                                                                                                                                                                                                                                                                                                                                                                                                                                                                                                                                                                                                                                                                                                                                                                                                                                                                      |

| Category    | Class       | SubClass            | Word_type | S8 | S9 |
|-------------|-------------|---------------------|-----------|----|----|
| Environment | Terrestrial | Terrestrial         | exclude   |    |    |
| Environment | Terrestrial | Forests             | include   |    |    |
| Environment | Terrestrial | Forests             | exclude   |    |    |
| Environment | Terrestrial | Agroecosystems      | include   |    |    |
| Environment | Terrestrial | Agroecosystems      | near      |    |    |
| Environment | Terrestrial | Agroecosystems      | exclude   |    |    |
| Environment | Terrestrial | Created Greenspace  | include   |    |    |
| Environment | Terrestrial | Created Greenspace  | near      |    |    |
| Environment | Terrestrial | Created Greenspace  | exclude   |    |    |
| Environment | Terrestrial | Grasslands          | include   |    |    |
| Environment | Terrestrial | Grasslands          | exclude   |    |    |
| Environment | Terrestrial | Scrublands_Shrublan | include   |    |    |
| Environment | Terrestrial | Barren_Rock and Sar | include   |    |    |
| Environment | Terrestrial | Barren_Rock and Sar | near      |    |    |
| Environment | Terrestrial | Barren_Rock and Sar | exclude   |    |    |
| Environment | Terrestrial | Tundra              | include   |    |    |
| Environment | Terrestrial | Tundra              | exclude   |    |    |
| Environment | Terrestrial | Ice and Snow        | include   |    |    |

| Category    | Class       | SubClass            | Word_type | S10 | S11 |
|-------------|-------------|---------------------|-----------|-----|-----|
|             |             |                     |           |     |     |
| Environment | Terrestrial | Terrestrial         | exclude   |     |     |
| Environment | Terrestrial | Forests             | include   |     |     |
|             |             |                     |           |     |     |
| Environment | Terrestrial | Forests             | exclude   |     |     |
| Environment | Terrestrial | Agroecosystems      | include   |     |     |
| Environment | Terrestrial | Agroecosystems      | near      |     |     |
|             |             |                     |           |     |     |
| Environment | Terrestrial | Agroecosystems      | exclude   |     |     |
| Environment | Terrestrial | Created Greenspace  | include   |     |     |
| Environment | Terrestrial | Created Greenspace  | near      |     |     |
| Environment | Terrestrial | Created Greenspace  | exclude   |     |     |
| Environment | Terrestrial | Grasslands          | include   |     |     |
| Environment | Terrestrial | Grasslands          | exclude   |     |     |
| Environment | Terrestrial | Scrublands_Shrublan | include   |     |     |
| Environment | Terrestrial | Barren_Rock and Sar | include   |     |     |
| Environment | Terrestrial | Barren_Rock and Sar | near      |     |     |
|             |             |                     |           |     |     |
| Environment | Terrestrial | Barren_Rock and Sar | exclude   |     |     |
| Environment | Terrestrial | Tundra              | include   |     |     |
|             |             |                     |           |     |     |
| Environment | Terrestrial | Tundra              | exclude   |     |     |
| Environment | Terrestrial | Ice and Snow        | include   |     |     |

| Category    | Class       | SubClass            | Word_type | S12 | S13 |
|-------------|-------------|---------------------|-----------|-----|-----|
|             |             |                     |           |     |     |
| Environment | Terrestrial | Terrestrial         | exclude   |     |     |
| Environment | Terrestrial | Forests             | include   |     |     |
|             |             |                     |           |     |     |
| Environment | Terrestrial | Forests             | exclude   |     |     |
| Environment | Terrestrial | Agroecosystems      | include   |     |     |
| Environment | Terrestrial | Agroecosystems      | near      |     |     |
|             |             |                     |           |     |     |
| Environment | Terrestrial | Agroecosystems      | exclude   |     |     |
| Environment | Terrestrial | Created Greenspace  | include   |     |     |
| Environment | Terrestrial | Created Greenspace  | near      |     |     |
| Environment | Terrestrial | Created Greenspace  | exclude   |     |     |
| Environment | Terrestrial | Grasslands          | include   |     |     |
| Environment | Terrestrial | Grasslands          | exclude   |     |     |
| Environment | Terrestrial | Scrublands_Shrublan | include   |     |     |
| Environment | Terrestrial | Barren_Rock and Sar | include   |     |     |
| Environment | Terrestrial | Barren_Rock and Sar | near      |     |     |
|             |             |                     |           |     |     |
| Environment | Terrestrial | Barren_Rock and Sar | exclude   |     |     |
| Environment | Terrestrial | Tundra              | include   |     |     |
|             |             |                     |           |     |     |
| Environment | Terrestrial | Tundra              | exclude   |     |     |
| Environment | Terrestrial | Ice and Snow        | include   |     |     |

| Category    | Class                            | SubClass                         | Word_type | S1                                                                                                                                                                                                                                                                                                                                                                                                                                                                                                   |
|-------------|----------------------------------|----------------------------------|-----------|------------------------------------------------------------------------------------------------------------------------------------------------------------------------------------------------------------------------------------------------------------------------------------------------------------------------------------------------------------------------------------------------------------------------------------------------------------------------------------------------------|
| Environment | Terrestrial                      | Ice and Snow                     | exclude   | headwater circaea ssc past historic carve quaternary depress advanced retreated deposited Pleistocene years ago epoch ice age                                                                                                                                                                                                                                                                                                                                                                        |
| Environment | Atmospheric                      | Atmosphere                       | include   | atmospher skies  sky  cloud the sky skyline sky line dark sky                                                                                                                                                                                                                                                                                                                                                                                                                                        |
| Environment | Atmospheric                      | Atmosphere                       | near      |                                                                                                                                                                                                                                                                                                                                                                                                                                                                                                      |
| Environment | Atmospheric                      | Atmosphere                       | exclude   | rural.*atmosphere changing.*climate welcoming.*atmosphere climate.*friendly cloud.*berry cloud.*water water.*cloud turbid atmospheric science NOAA Atmospheric Administration deposit atmospheric fall sky lupine                                                                                                                                                                                                                                                                                    |
| FEGS        | Air                              | Air                              | include   | air                                                                                                                                                                                                                                                                                                                                                                                                                                                                                                  |
| FEGS        | Air                              | Air                              | near      | asthma respiratory health safe clean breath protect restore resource quality discharge emission load carried carry point source emission reduce reduction                                                                                                                                                                                                                                                                                                                                            |
| FEGS        | Air                              | Air                              | exclude   | cair pair fair air yam air plant chair questionnaire airborne affair millionaire dairy act airshed National.*Weather.*Service impair repair topic federal belleair tmdl air.*act ciceet prairie airport clean.*air.*act national.*air.*standard airplane airstrip muck regulat.*air lair Air Resource Specialist Clean Air Bond potato dair air force www Air Resources Lab air rifle air condition airfield airboat stair air station nair bair fair air yam air plant air temp hair aircraft f air |
| FEGS        | Atmospheric Phenon               | Atmospheric Phenon               | include   | sunrise sunset eclipse sundown rainbow twilight                                                                                                                                                                                                                                                                                                                                                                                                                                                      |
| FEGS        | Atmospheric Phenon               | Atmospheric Phenon               | near      |                                                                                                                                                                                                                                                                                                                                                                                                                                                                                                      |
| FEGS        | Atmospheric Phenon               | Atmospheric Phenon               | exclude   | rodent staff presentation created.*volunteer 15.*visitor pollution pollutant climate temperature marina island provision 15.*visitor trout smelt sunset of sunset on biofog to sunset image imaging clouded navigat sunset of sunset on sunset in sunsets on sunsets in infog turbid rainbow snake after sunset rainbow star rainbow surf sunset at before sunset sunset cove sunrise to rainbow dart rainbow dam                                                                                    |
| FEGS        | Depredators and (Pest) Predators | Depredators and (Pest) Predators | include   | biologic control biocontrol biological control natural population control natural check natural control biologic means biological means biologic methods biological methods natural pathogen control natural pest control natural disease control depredator pest predator natural insect control natural pest control                                                                                                                                                                               |
| FEGS        | Depredators and (Pest) Predators | Depredators and (Pest) Predators | near      |                                                                                                                                                                                                                                                                                                                                                                                                                                                                                                      |
| FEGS        | Depredators and (Pest) Predators | Depredators and (Pest) Predators | exclude   |                                                                                                                                                                                                                                                                                                                                                                                                                                                                                                      |
| FEGS        | Fauna                            | Fauna                            | include   | raptor fauna animal mammal wildlife bird owl fowl duck sparrow warbler plover falcon osprey hawk eagle pelican geese pidgeon pigeon turtle tortoise sea l whale dolphin porpoise manatee otter coral dragonfl insect beetle entomolo bug deer turkey quail waterfowl duck goose reptile alligator amphibian sala mander frog toad skink bat nutria raccoon hogs rabbit beaver rookery rookeries butter horseshoe crab                                                                                |

| Category    | Class                            | SubClass                         | Word_type | S2                                                                                                                                                                                                                                                                                                                                                                                                                                                                                                                                           | S3                                                                                                                                                                                                                                                                                                                                                                                                                                                                                                      |
|-------------|----------------------------------|----------------------------------|-----------|----------------------------------------------------------------------------------------------------------------------------------------------------------------------------------------------------------------------------------------------------------------------------------------------------------------------------------------------------------------------------------------------------------------------------------------------------------------------------------------------------------------------------------------------|---------------------------------------------------------------------------------------------------------------------------------------------------------------------------------------------------------------------------------------------------------------------------------------------------------------------------------------------------------------------------------------------------------------------------------------------------------------------------------------------------------|
|             |                                  |                                  |           | <p>service practice choice office advice twice appendix notice device lice police voice auspice price sacrifice justice indices vicente globicephala jamaicensis tip.*of.*the.*iceberg ser.*vice rice prac.*tice mice septicemia kice nice ssc ciceet vice dice pice past historic carve quaternary depress advanced retreated deposited Pleistocene years ago epoch ice age tice fice icen iceplant ice plant</p>                                                                                                                           |                                                                                                                                                                                                                                                                                                                                                                                                                                                                                                         |
| Environment | Terrestrial                      | Ice and Snow                     | exclude   | <p>plover egret goose geese ssc owl snowpatch snowberry snowy orchid snowline tsnow snowbird lepus americanus</p>                                                                                                                                                                                                                                                                                                                                                                                                                            |                                                                                                                                                                                                                                                                                                                                                                                                                                                                                                         |
| Environment | Atmospheric                      | Atmosphere                       | include   | TMDL pollution discharg emission wind                                                                                                                                                                                                                                                                                                                                                                                                                                                                                                        | air                                                                                                                                                                                                                                                                                                                                                                                                                                                                                                     |
| Environment | Atmospheric                      | Atmosphere                       | near      | air atmospher                                                                                                                                                                                                                                                                                                                                                                                                                                                                                                                                |                                                                                                                                                                                                                                                                                                                                                                                                                                                                                                         |
|             |                                  |                                  |           | <p>pair fair air yam air plant chair questionnaire airborne affair millionaire dairy act airshed National.*Weather.*Service impair repair topic federal belleair tmdl air.*act ciceet prair airport clean.*air.*act national.*air.*standard airplane airstrip muck regulat.*air air Air Resource Specialist Clean Air Bond potato dair air force www Air Resources Lab air rifle air condition airfield airboat stair air station nair bair fair air yam air plant air temp hair aircraft cair</p>                                           | <p>pair fair air yam air plant chair questionnaire airborne affair millionaire dairy act airshed National.*Weather.*Service impair repair topic federal belleair tmdl air.*act ciceet prair airport clean.*air.*act national.*air.*standard airplane airstrip muck regulat.*air air Air Resource Specialist Clean Air Bond potato dair air force www Air Resources Lab air rifle air condition airfield airboat stair air station nair bair fair air yam air plant air temp hair aircraft cair</p>      |
| FEGS        | Air                              | Air                              | include   | air                                                                                                                                                                                                                                                                                                                                                                                                                                                                                                                                          | air                                                                                                                                                                                                                                                                                                                                                                                                                                                                                                     |
|             |                                  |                                  |           | <p>relax enjoy special unique preserv bounty bountiful benefit recreat valuable thours value restore resource protect asset special amenit desirable pleasant healthy hallmark recreat opportunit experienc enjoy relax families family children visitor touris</p>                                                                                                                                                                                                                                                                          | <p>specimen.*collect sample.*collect data.*collect collect.*specimen collect.*sample collect.*data specimen.*gather sample.*gather data.*gather gather.*specimen gather.*sample gather.*data collect.*research research.*collect scien.*collect collect.*scien</p>                                                                                                                                                                                                                                      |
|             |                                  |                                  |           | <p>cair pair fair air yam air plant chair questionnaire airborne affair millionaire dairy act airshed National.*Weather.*Service impair repair topic federal belleair tmdl air.*act ciceet prair airport clean.*air.*act national.*air.*standard airplane airstrip muck regulat.*air air Air Resource Specialist Clean Air Bond potato dair bair air force www Air Resources Lab air rifle air condition airfield airboat stair air station nair bair fair air yam air plant air temp hair aircraft temperature value biomass value</p>      | <p>cair pair fair air yam air plant chair questionnaire airborne affair millionaire dairy act airshed National.*Weather.*Service impair repair topic federal belleair tmdl air.*act ciceet prair airport clean.*air.*act national.*air.*standard airplane airstrip muck regulat.*air air Air Resource Specialist Clean Air Bond potato dair bair air force www Air Resources Lab air rifle air condition airfield airboat stair air station nair bair fair air yam air plant air temp hair aircraft</p> |
| FEGS        | Air                              | Air                              | exclude   |                                                                                                                                                                                                                                                                                                                                                                                                                                                                                                                                              |                                                                                                                                                                                                                                                                                                                                                                                                                                                                                                         |
| FEGS        | Atmospheric Phenon               | Atmospheric Phenon               | include   |                                                                                                                                                                                                                                                                                                                                                                                                                                                                                                                                              |                                                                                                                                                                                                                                                                                                                                                                                                                                                                                                         |
| FEGS        | Atmospheric Phenon               | Atmospheric Phenon               | near      |                                                                                                                                                                                                                                                                                                                                                                                                                                                                                                                                              |                                                                                                                                                                                                                                                                                                                                                                                                                                                                                                         |
|             |                                  |                                  |           |                                                                                                                                                                                                                                                                                                                                                                                                                                                                                                                                              |                                                                                                                                                                                                                                                                                                                                                                                                                                                                                                         |
| FEGS        | Atmospheric Phenon               | Atmospheric Phenon               | exclude   |                                                                                                                                                                                                                                                                                                                                                                                                                                                                                                                                              |                                                                                                                                                                                                                                                                                                                                                                                                                                                                                                         |
|             |                                  |                                  |           | <p>organic approach organic.*garden garden.*organic farm.*organic organic.*farm agric.*organic organic.*agric</p>                                                                                                                                                                                                                                                                                                                                                                                                                            | <p>agricultural environmental management IPM integrated pest management</p>                                                                                                                                                                                                                                                                                                                                                                                                                             |
| FEGS        | Depredators and (Pest) Predators | Depredators and (Pest) Predators | include   |                                                                                                                                                                                                                                                                                                                                                                                                                                                                                                                                              |                                                                                                                                                                                                                                                                                                                                                                                                                                                                                                         |
|             |                                  |                                  |           | <p>pest predator</p>                                                                                                                                                                                                                                                                                                                                                                                                                                                                                                                         |                                                                                                                                                                                                                                                                                                                                                                                                                                                                                                         |
| FEGS        | Depredators and (Pest) Predators | Depredators and (Pest) Predators | near      |                                                                                                                                                                                                                                                                                                                                                                                                                                                                                                                                              |                                                                                                                                                                                                                                                                                                                                                                                                                                                                                                         |
|             |                                  |                                  |           | <p>organic pesticide agricultural runoff organic material</p>                                                                                                                                                                                                                                                                                                                                                                                                                                                                                | <p>uipm hipm</p>                                                                                                                                                                                                                                                                                                                                                                                                                                                                                        |
| FEGS        | Depredators and (Pest) Predators | Depredators and (Pest) Predators | exclude   |                                                                                                                                                                                                                                                                                                                                                                                                                                                                                                                                              |                                                                                                                                                                                                                                                                                                                                                                                                                                                                                                         |
|             |                                  |                                  |           | <p>pelt tanning tannery hunt.*meat meat.*hunt trap.*meat meat.*trap shoot.*hunt hunt.*shoot hunt.*kill kill.*hunt hunt.*meat trap.*meat meat.*hunt meat.*trap hunt.*edible trap.*edible edible.*hunt edible.*trap hunt.*consumpt trap.*consumpt consumpt.*hunt consumpt.*trap hunt.*eaten trap.*eaten eaten.*hunt eaten.*trap subsist.*hunt hunt.*subsist trap.*subsist subsist.*trap bat band bird band hunting hunter trapping season bird life signs of wildlife birding birdwatch bird watch whale watch whale sight bird bird hunts</p> | <p>skin hide fur furs fur-bear fur bear furbear meat game</p>                                                                                                                                                                                                                                                                                                                                                                                                                                           |
| FEGS        | Fauna                            | Fauna                            | include   |                                                                                                                                                                                                                                                                                                                                                                                                                                                                                                                                              |                                                                                                                                                                                                                                                                                                                                                                                                                                                                                                         |

| Category    | Class                            | SubClass                         | Word_type | S4                                                                                                                   | S5           |
|-------------|----------------------------------|----------------------------------|-----------|----------------------------------------------------------------------------------------------------------------------|--------------|
|             |                                  |                                  |           |                                                                                                                      |              |
| Environment | Terrestrial                      | Ice and Snow                     | exclude   |                                                                                                                      |              |
| Environment | Atmospheric                      | Atmosphere                       | include   |                                                                                                                      |              |
| Environment | Atmospheric                      | Atmosphere                       | near      |                                                                                                                      |              |
|             |                                  |                                  |           |                                                                                                                      |              |
| Environment | Atmospheric                      | Atmosphere                       | exclude   |                                                                                                                      |              |
| FEGS        | Air                              | Air                              | include   | atmos                                                                                                                |              |
|             |                                  |                                  |           |                                                                                                                      |              |
| FEGS        | Air                              | Air                              | near      | emission.*to release.*to reduce reduction discharge.*to                                                              |              |
|             |                                  |                                  |           |                                                                                                                      |              |
| FEGS        | Air                              | Air                              | exclude   | deposition load.*from cooperative atmosphere rural atmosphere welcoming atmosphere load.*of atmospheric load to.*bay |              |
| FEGS        | Atmospheric Phenon               | Atmospheric Phenon               | include   |                                                                                                                      |              |
| FEGS        | Atmospheric Phenon               | Atmospheric Phenon               | near      |                                                                                                                      |              |
|             |                                  |                                  |           |                                                                                                                      |              |
| FEGS        | Atmospheric Phenon               | Atmospheric Phenon               | exclude   |                                                                                                                      |              |
| FEGS        | Depredators and (Pest) Predators | Depredators and (Pest) Predators | include   |                                                                                                                      |              |
| FEGS        | Depredators and (Pest) Predators | Depredators and (Pest) Predators | near      |                                                                                                                      |              |
| FEGS        | Depredators and (Pest) Predators | Depredators and (Pest) Predators | exclude   |                                                                                                                      |              |
|             |                                  |                                  |           |                                                                                                                      |              |
| FEGS        | Fauna                            | Fauna                            | include   | game hunting hunts hunter                                                                                            | bioturbation |

| Category    | Class                            | SubClass                         | Word_type | S6                                                                                                                                                                                                                                                                                                                                                                                                                 | S7   |
|-------------|----------------------------------|----------------------------------|-----------|--------------------------------------------------------------------------------------------------------------------------------------------------------------------------------------------------------------------------------------------------------------------------------------------------------------------------------------------------------------------------------------------------------------------|------|
|             |                                  |                                  |           |                                                                                                                                                                                                                                                                                                                                                                                                                    |      |
| Environment | Terrestrial                      | Ice and Snow                     | exclude   |                                                                                                                                                                                                                                                                                                                                                                                                                    |      |
| Environment | Atmospheric                      | Atmosphere                       | include   |                                                                                                                                                                                                                                                                                                                                                                                                                    |      |
| Environment | Atmospheric                      | Atmosphere                       | near      |                                                                                                                                                                                                                                                                                                                                                                                                                    |      |
|             |                                  |                                  |           |                                                                                                                                                                                                                                                                                                                                                                                                                    |      |
| Environment | Atmospheric                      | Atmosphere                       | exclude   |                                                                                                                                                                                                                                                                                                                                                                                                                    |      |
| FEGS        | Air                              | Air                              | include   |                                                                                                                                                                                                                                                                                                                                                                                                                    |      |
|             |                                  |                                  |           |                                                                                                                                                                                                                                                                                                                                                                                                                    |      |
| FEGS        | Air                              | Air                              | near      |                                                                                                                                                                                                                                                                                                                                                                                                                    |      |
|             |                                  |                                  |           |                                                                                                                                                                                                                                                                                                                                                                                                                    |      |
| FEGS        | Air                              | Air                              | exclude   |                                                                                                                                                                                                                                                                                                                                                                                                                    |      |
| FEGS        | Atmospheric Phenon               | Atmospheric Phenon               | include   |                                                                                                                                                                                                                                                                                                                                                                                                                    |      |
| FEGS        | Atmospheric Phenon               | Atmospheric Phenon               | near      |                                                                                                                                                                                                                                                                                                                                                                                                                    |      |
|             |                                  |                                  |           |                                                                                                                                                                                                                                                                                                                                                                                                                    |      |
| FEGS        | Atmospheric Phenon               | Atmospheric Phenon               | exclude   |                                                                                                                                                                                                                                                                                                                                                                                                                    |      |
| FEGS        | Depredators and (Pest) Predators | Depredators and (Pest) Predators | include   |                                                                                                                                                                                                                                                                                                                                                                                                                    |      |
| FEGS        | Depredators and (Pest) Predators | Depredators and (Pest) Predators | near      |                                                                                                                                                                                                                                                                                                                                                                                                                    |      |
| FEGS        | Depredators and (Pest) Predators | Depredators and (Pest) Predators | exclude   |                                                                                                                                                                                                                                                                                                                                                                                                                    |      |
| FEGS        | Fauna                            | Fauna                            | include   | raptor fauna animal mammal wildlife bird owl fowl duck sparrow warbler plover falcon osprey hawk eagle pelican geese pidgeon pigeon turtle tortoise sea whale dolphin porpoise manatee otter coral dragonfl insect beetle entomolo bug deer turkey quail waterfowl duck goose reptile alligator amphibian salamander frog toad skink bat nutria raccoon hogs rabbit beaver rookery rookeries butter horseshoe crab | bait |

| Category    | Class                            | SubClass                         | Word_type | S8                                                                                                                                             | S9                                                    |
|-------------|----------------------------------|----------------------------------|-----------|------------------------------------------------------------------------------------------------------------------------------------------------|-------------------------------------------------------|
|             |                                  |                                  |           |                                                                                                                                                |                                                       |
| Environment | Terrestrial                      | Ice and Snow                     | exclude   |                                                                                                                                                |                                                       |
| Environment | Atmospheric                      | Atmosphere                       | include   |                                                                                                                                                |                                                       |
| Environment | Atmospheric                      | Atmosphere                       | near      |                                                                                                                                                |                                                       |
|             |                                  |                                  |           |                                                                                                                                                |                                                       |
| Environment | Atmospheric                      | Atmosphere                       | exclude   |                                                                                                                                                |                                                       |
| FEGS        | Air                              | Air                              | include   |                                                                                                                                                |                                                       |
|             |                                  |                                  |           |                                                                                                                                                |                                                       |
| FEGS        | Air                              | Air                              | near      |                                                                                                                                                |                                                       |
|             |                                  |                                  |           |                                                                                                                                                |                                                       |
| FEGS        | Air                              | Air                              | exclude   |                                                                                                                                                |                                                       |
| FEGS        | Atmospheric Phenon               | Atmospheric Phenon               | include   |                                                                                                                                                |                                                       |
| FEGS        | Atmospheric Phenon               | Atmospheric Phenon               | near      |                                                                                                                                                |                                                       |
|             |                                  |                                  |           |                                                                                                                                                |                                                       |
| FEGS        | Atmospheric Phenon               | Atmospheric Phenon               | exclude   |                                                                                                                                                |                                                       |
| FEGS        | Depredators and (Pest) Predators | Depredators and (Pest) Predators | include   |                                                                                                                                                |                                                       |
| FEGS        | Depredators and (Pest) Predators | Depredators and (Pest) Predators | near      |                                                                                                                                                |                                                       |
| FEGS        | Depredators and (Pest) Predators | Depredators and (Pest) Predators | exclude   |                                                                                                                                                |                                                       |
|             |                                  |                                  |           |                                                                                                                                                |                                                       |
| FEGS        | Fauna                            | Fauna                            | include   | species of concern species of special concern endangered.*species threatened.*species species.*endangered species.*threatened protect.*species | marine.*species terrestrial.*species aquatic.*species |

| Category    | Class                            | SubClass                         | Word_type | S10 | S11 |
|-------------|----------------------------------|----------------------------------|-----------|-----|-----|
|             |                                  |                                  |           |     |     |
| Environment | Terrestrial                      | Ice and Snow                     | exclude   |     |     |
| Environment | Atmospheric                      | Atmosphere                       | include   |     |     |
| Environment | Atmospheric                      | Atmosphere                       | near      |     |     |
|             |                                  |                                  |           |     |     |
| Environment | Atmospheric                      | Atmosphere                       | exclude   |     |     |
| FEGS        | Air                              | Air                              | include   |     |     |
|             |                                  |                                  |           |     |     |
| FEGS        | Air                              | Air                              | near      |     |     |
|             |                                  |                                  |           |     |     |
| FEGS        | Air                              | Air                              | exclude   |     |     |
| FEGS        | Atmospheric Phenon               | Atmospheric Phenon               | include   |     |     |
| FEGS        | Atmospheric Phenon               | Atmospheric Phenon               | near      |     |     |
|             |                                  |                                  |           |     |     |
| FEGS        | Atmospheric Phenon               | Atmospheric Phenon               | exclude   |     |     |
| FEGS        | Depredators and (Pest) Predators | Depredators and (Pest) Predators | include   |     |     |
| FEGS        | Depredators and (Pest) Predators | Depredators and (Pest) Predators | near      |     |     |
| FEGS        | Depredators and (Pest) Predators | Depredators and (Pest) Predators | exclude   |     |     |
|             |                                  |                                  |           |     |     |
| FEGS        | Fauna                            | Fauna                            | include   |     |     |

| Category    | Class                            | SubClass                         | Word_type | S12 | S13 |
|-------------|----------------------------------|----------------------------------|-----------|-----|-----|
|             |                                  |                                  |           |     |     |
| Environment | Terrestrial                      | Ice and Snow                     | exclude   |     |     |
| Environment | Atmospheric                      | Atmosphere                       | include   |     |     |
| Environment | Atmospheric                      | Atmosphere                       | near      |     |     |
|             |                                  |                                  |           |     |     |
| Environment | Atmospheric                      | Atmosphere                       | exclude   |     |     |
| FEGS        | Air                              | Air                              | include   |     |     |
|             |                                  |                                  |           |     |     |
| FEGS        | Air                              | Air                              | near      |     |     |
|             |                                  |                                  |           |     |     |
| FEGS        | Air                              | Air                              | exclude   |     |     |
| FEGS        | Atmospheric Phenon               | Atmospheric Phenon               | include   |     |     |
| FEGS        | Atmospheric Phenon               | Atmospheric Phenon               | near      |     |     |
|             |                                  |                                  |           |     |     |
| FEGS        | Atmospheric Phenon               | Atmospheric Phenon               | exclude   |     |     |
| FEGS        | Depredators and (Pest) Predators | Depredators and (Pest) Predators | include   |     |     |
| FEGS        | Depredators and (Pest) Predators | Depredators and (Pest) Predators | near      |     |     |
| FEGS        | Depredators and (Pest) Predators | Depredators and (Pest) Predators | exclude   |     |     |
|             |                                  |                                  |           |     |     |
| FEGS        | Fauna                            | Fauna                            | include   |     |     |

| Category | Class | SubClass | Word_type | S1                                                                                                                                                                                                                                                                                                                                                                                                                                                                                                                                                                                                                                                                                                                                                                                                                                                                                                                                                                                                                                                                                                                                                                                                                                                                                                                                                                                                                                                                                                                                                                                                                                                    |
|----------|-------|----------|-----------|-------------------------------------------------------------------------------------------------------------------------------------------------------------------------------------------------------------------------------------------------------------------------------------------------------------------------------------------------------------------------------------------------------------------------------------------------------------------------------------------------------------------------------------------------------------------------------------------------------------------------------------------------------------------------------------------------------------------------------------------------------------------------------------------------------------------------------------------------------------------------------------------------------------------------------------------------------------------------------------------------------------------------------------------------------------------------------------------------------------------------------------------------------------------------------------------------------------------------------------------------------------------------------------------------------------------------------------------------------------------------------------------------------------------------------------------------------------------------------------------------------------------------------------------------------------------------------------------------------------------------------------------------------|
|          |       |          |           | <p>accomodat activit aesthetic amenable amenit appreciat artisan artist asset attract beaut beneficial benefit bequest biodiversity bountiful bounty business b<br/>uy care caring charisma cherish children collect comfort commercial commodities commodity goods concern conserv corporation critical dealer delicious des<br/>ired desirable destination econom edible educat encourag endangered enhance enhancing enjoy encounter enthusiast experien exploit extract families fav<br/>rable favor feel festiv ceremon fur furs fur-bear fur</p> <p>bear furbear future gather generation hallmark harvest healthy heritage hide hunt income indigenous.*people indian population indian<br/>people indigenous.*person industry initiative inspir interest job learn legacy leisure livelihood market meat native.*person native<br/>american observ opportunit participant participate pelt pick pleasant popular preserv products profession profit promote promotion purpose protect quality<br/>. *life rare recreat relax resource restor sale save saving sell sight skins special specimen spectacular sport steward subsist sustenance threatened together <br/>tours trade trading sustainabl tradition treasure tribal tribe unique valuable value valuing view visit visitor watch well suited well-<br/>suited wonder allure alluring mystique option value lifeblood jewel extraordinary excellent amaze amazing stunning majestic spectacular</p>                                                                                                                                                                                 |
| FEGS     | Fauna | Fauna    | near      |                                                                                                                                                                                                                                                                                                                                                                                                                                                                                                                                                                                                                                                                                                                                                                                                                                                                                                                                                                                                                                                                                                                                                                                                                                                                                                                                                                                                                                                                                                                                                                                                                                                       |
|          |       |          |           | <p>toad flax goosefoot snowbird geoduck domestic animal production of animal production of plants and animal turtle cove turtleback animal<br/>production insecticide otter point creek bullfrog creek buttercup buttermilk butterwort abutter butter clam rookerybay rookery<br/>bay batbing bato batk tbat batsto bata abat bate bath bati batu blackbird creek dairy c-<br/>hawk hawken redbug lowl batr muskin sealant sealing sealed hawkey hawkin hawken knowl combat butterfish butterfly orchid manatee county animal<br/>feeding animal waste CAFO batt agency askin pickerel by-product byproduct by<br/>product chid entrap strap trap.*gas gas.*trap sediment.*trap contam.*trap nutrient.*trap pollut.*trap trap.*contam trap.*nutrient trap.*pollut sand.*trap tra<br/>p.*sand trap.*sediment litter trap fish trap especial power.*generation electric.*generation generation plant generation facilit laboratory observ field observ lab<br/>observ special issue meadow beauty river beauty beautiful jacob spring beauty beautyberry carex carey personal care careo aquarium care lawn<br/>care careful exotic extrapolat askin pickerel invasive species iskin nuisance species overview in view of over-view over-<br/>view peltandra pelti pelto apelt peltu pelta pelte provid.* no clue provid.* notice provid.* basis provid.*expertise rarely temperature value biomass<br/>value nonprofit non-profit refur review bayview sensitive fern shunt huntley huntington hunterdon sking salem mysella economus newmarket skink skin<br/>lesion skin condition strap sulfur specialist tradeoff trade-off transport workshop</p> |
| FEGS     | Fauna | Fauna    | exclude   |                                                                                                                                                                                                                                                                                                                                                                                                                                                                                                                                                                                                                                                                                                                                                                                                                                                                                                                                                                                                                                                                                                                                                                                                                                                                                                                                                                                                                                                                                                                                                                                                                                                       |

| Category | Class | SubClass | Word_type | S2                                                                                                                                                                                                                                                                                                                                                                                                                                                                                                                                                                                                                                                                                                                                                                                                                                                                                                                                                                                                                                                                                                                                         | S3                                                                                                                                                                                                                                                                                                                                                                                                                                                                                                                                                                                                                                                                                                                                                                                                                                                                                                                                                                                                                                                                                                    |
|----------|-------|----------|-----------|--------------------------------------------------------------------------------------------------------------------------------------------------------------------------------------------------------------------------------------------------------------------------------------------------------------------------------------------------------------------------------------------------------------------------------------------------------------------------------------------------------------------------------------------------------------------------------------------------------------------------------------------------------------------------------------------------------------------------------------------------------------------------------------------------------------------------------------------------------------------------------------------------------------------------------------------------------------------------------------------------------------------------------------------------------------------------------------------------------------------------------------------|-------------------------------------------------------------------------------------------------------------------------------------------------------------------------------------------------------------------------------------------------------------------------------------------------------------------------------------------------------------------------------------------------------------------------------------------------------------------------------------------------------------------------------------------------------------------------------------------------------------------------------------------------------------------------------------------------------------------------------------------------------------------------------------------------------------------------------------------------------------------------------------------------------------------------------------------------------------------------------------------------------------------------------------------------------------------------------------------------------|
| FEGS     | Fauna | Fauna    | near      |                                                                                                                                                                                                                                                                                                                                                                                                                                                                                                                                                                                                                                                                                                                                                                                                                                                                                                                                                                                                                                                                                                                                            | exploit hunt trap harvest company corporation trade                                                                                                                                                                                                                                                                                                                                                                                                                                                                                                                                                                                                                                                                                                                                                                                                                                                                                                                                                                                                                                                   |
| FEGS     | Fauna | Fauna    | exclude   | scavenger hunt fish.*trap trap.*fish agency askin pickerel by-product byproduct by<br>product chid entrap strap trap.*gas gas.*trap sediment.*trap contam.*trap nut<br>rient.*trap pollut.*trap trap.*contam trap.*nutrient trap.*pollut sand.*trap trap<br>.*sand trap.*sediment litter trap fish<br>trap especial power.*generation electric.*generation generation<br>plant generation facilit laboratory observ field observ lab observ special<br>issue meadow beauty river beauty beautiful jacob spring<br>beauty beautyberry carex carey personal care careo aquarium care lawn<br>care careful exotic extrapolat askin pickerel invasive species iskin nuisance<br>species overview in view of over-view over-<br>view peltandra pelti pelto apelt peltu pelta pelte provid.* no clue provid.*<br>notice provid.* basis provid.*expertise rarely temperature value biomass<br>value nonprofit non-profit refur review bayview sensitive<br>fern shunt huntley huntington hunterdon sking saalem mysella economus new<br>market skink skin lesion skin condition strap sulfur specialist tradeoff trade-<br>off transport workshop | agency askin pickerel by-product byproduct by<br>product chid entrap strap trap.*gas gas.*trap sediment.*trap contam.*trap nut<br>rient.*trap pollut.*trap trap.*contam trap.*nutrient trap.*pollut sand.*trap trap<br>.*sand trap.*sediment litter trap fish<br>trap especial power.*generation electric.*generation generation<br>plant generation facilit laboratory observ field observ lab observ special<br>issue meadow beauty river beauty beautiful jacob spring<br>beauty beautyberry carex carey personal care careo aquarium care lawn<br>care careful exotic extrapolat askin pickerel invasive species iskin nuisance<br>species overview in view of over-view over-<br>view peltandra pelti pelto apelt peltu pelta pelte provid.* no clue provid.*<br>notice provid.* basis provid.*expertise rarely temperature value biomass<br>value nonprofit non-profit refur review bayview sensitive<br>fern shunt huntley huntington hunterdon sking saalem mysella economus new<br>market skink skin lesion skin condition strap sulfur specialist tradeoff trade-<br>off transport workshop |

| Category | Class | SubClass | Word_type | S4                                                                                                                                                                                                                                                                                                                                                                                                                                                                                                                 | S5 |
|----------|-------|----------|-----------|--------------------------------------------------------------------------------------------------------------------------------------------------------------------------------------------------------------------------------------------------------------------------------------------------------------------------------------------------------------------------------------------------------------------------------------------------------------------------------------------------------------------|----|
| FEGS     | Fauna | Fauna    | near      | wild harvest raptor fauna animal mammal wildlife bird owl fowl duck sparrow warbler plover falcon osprey hawk eagle pelican geese pidgeon pigeon turtle tortoise seal whale dolphin porpoise manatee otter coral dragonfl insect bee tle entomolo bug deer turkey quail waterfowl duck goose reptile alligator amphibian salamander frog toad skink bat nutria raccoon hogs rabbit beaver rookery rookeries butter marine.*species terrestrial.*species aquatic.*species horse shoe crab recreation sport resource |    |
|          |       |          | exclude   | shunt huntley huntington transport scavenger hunt                                                                                                                                                                                                                                                                                                                                                                                                                                                                  |    |

| Category | Class | SubClass | Word_type | S6                                                                                                                                                                                                                                                                                                                                                                                                                                                                                                                                                                                                                                                                                                                                                                                                                                                                                                                                                                                                                                                                                                                                                                                                                                                                                                                                                                                                                                                                                                                                                                                            | S7   |
|----------|-------|----------|-----------|-----------------------------------------------------------------------------------------------------------------------------------------------------------------------------------------------------------------------------------------------------------------------------------------------------------------------------------------------------------------------------------------------------------------------------------------------------------------------------------------------------------------------------------------------------------------------------------------------------------------------------------------------------------------------------------------------------------------------------------------------------------------------------------------------------------------------------------------------------------------------------------------------------------------------------------------------------------------------------------------------------------------------------------------------------------------------------------------------------------------------------------------------------------------------------------------------------------------------------------------------------------------------------------------------------------------------------------------------------------------------------------------------------------------------------------------------------------------------------------------------------------------------------------------------------------------------------------------------|------|
| FEGS     | Fauna | Fauna    | near      | essential habitat critical habitat feeding ground                                                                                                                                                                                                                                                                                                                                                                                                                                                                                                                                                                                                                                                                                                                                                                                                                                                                                                                                                                                                                                                                                                                                                                                                                                                                                                                                                                                                                                                                                                                                             | worm |
| FEGS     | Fauna | Fauna    | exclude   | toad flax goosefoot snowbird geoduck domestic animal production of animal production of plants and animal turtle cove turtleback animal production otter point creek bullfrog creek insecticide buttercup buttermilk butterwort abutter butter clam rookerybay rookery bay batbing bato batk tbat batsto bata abat bate bath bati batu blackbird creek dairy c-hawk hawken redbug lowl batr muskin sealant sealing sealed hawkey hawkin hawken knowl combat butterfish butterfly orchid manatee county animal feeding animal waste CAFO batt agency askin pickerel by-product byproduct by product chid entrap strap gas.*trap trap.*gas sediment.*trap contam.*trap nutrient.*trap pollut.*trap trap.*contam trap.*nutrient trap.*pollut sand.*trap trap.*sand trap.*sediment litter trap fish trap especial power.*generation electric.*generation generation plant generation facilit laboratory observ field observ lab observ special issue meadow beauty river beauty beautiful jacob spring beauty beautyberry carex carey personal care careo aquarium care lawn care careful exotic extrapolat askin pickerel invasive species iskin nuisance species overview in view of over-view over-view peltandra pelti pelto apelt peltu pelta pelte provid.*no clue provid.*notice provid.*basis provid.*expertise rarely temperature value biomass value nonprofit non-profit refur review bayview sensitive fern shunt huntley huntington hunterdon sking saalem mysella economy new market skink skin lesion skin condition strap sulfur specialist tradeoff trade-off transport workshop |      |

| Category | Class | SubClass | Word_type | S8                                                                                                                                                                                                                                         | S9                                                                                                                                                                                                                                                                                                                                                                                                                                                                                                                                                                                                                                                                                                                                                                                                                                                                                                                                                                                                                                                                                                                                                                                                                                                                                                                                                                                                                                                                                                                                                                                                                                                                                                                                              |
|----------|-------|----------|-----------|--------------------------------------------------------------------------------------------------------------------------------------------------------------------------------------------------------------------------------------------|-------------------------------------------------------------------------------------------------------------------------------------------------------------------------------------------------------------------------------------------------------------------------------------------------------------------------------------------------------------------------------------------------------------------------------------------------------------------------------------------------------------------------------------------------------------------------------------------------------------------------------------------------------------------------------------------------------------------------------------------------------------------------------------------------------------------------------------------------------------------------------------------------------------------------------------------------------------------------------------------------------------------------------------------------------------------------------------------------------------------------------------------------------------------------------------------------------------------------------------------------------------------------------------------------------------------------------------------------------------------------------------------------------------------------------------------------------------------------------------------------------------------------------------------------------------------------------------------------------------------------------------------------------------------------------------------------------------------------------------------------|
|          |       |          |           |                                                                                                                                                                                                                                            | <p>accomodat activit aesthetic ameniable amenit appreciat artisan artist asset att<br/>ract beaut beneficial benefit bequest biodiversity bountiful bounty business b<br/>uy care caring charisma cherish children collect comfort commercial commodit<br/>ies commodity goods concern conserv corporation critical dealer delicious desi<br/>red desirable destination econom edible educat encourag endangered enhance<br/> enhancing enjoy encounter enthusiast experienc exploit extract families favor<br/>able favor feel festiv ceremon fur furs fur-bear fur<br/>bear furbear future gather generation hallmark harvest healthy heritage hide <br/>hunt income indigenous.*people indian population indian<br/>people indigenous.*person industry initiative inspir interest job learn legacy lei<br/>sure livelihood market meat native.*person native<br/>american observ opportunit participant participate pelt pick pleasant popular <br/>preserv products profession profit promote promotion purpose protect quality<br/>.*life rare recreat relax resource restor sale save saving sell sight skins special<br/> specimen spectacular sport steward subsist sustenance threatened together t<br/>ours trade trading sustainabl tradition treasure tribal tribe unique valuable val<br/>ue valuing view visit visitor watch well suited well-<br/>suited wonder allure alluring mystique option<br/>value lifeblood jewel extraordinary excellent amaze amazing stunning majestic<br/> spectacular</p>                                                                                                                                                                                                                           |
| FEGS     | Fauna | Fauna    | near      |                                                                                                                                                                                                                                            |                                                                                                                                                                                                                                                                                                                                                                                                                                                                                                                                                                                                                                                                                                                                                                                                                                                                                                                                                                                                                                                                                                                                                                                                                                                                                                                                                                                                                                                                                                                                                                                                                                                                                                                                                 |
|          |       |          |           |                                                                                                                                                                                                                                            | <p>flora plant flower root grass kelp seaweed vegetation mangrove reed cypress <br/>sphagnum cattail moss palm berry berries seeds fruit nuts tree sedge moss li<br/>chen forest pine oak cypress elm <br/>ash maple hickory hardwood cedar goosefoot snowbird geoduck domestic<br/>animal production of animal production of plants and animal turtle<br/>cove turtleback animal production insecticide otter point creek bullfrog<br/>creek buttercup buttermilk butterwort abutter butter clam rookerybay rookery<br/>bay batbing bato batk tbat batsto bata abat bate bath bati batu blackbird<br/>creek dairy c-<br/>hawk hawken redbug lowl batr muskin sealant sealing sealed hawkey hawkin <br/>hawken knowl combat butterfish butterfly orchid manatee county animal<br/>feeding animal waste CAFO batt agency askin pickerel by-<br/>product byproduct by<br/>product chid entrap strap trap.*gas gas.*trap sediment.*trap contam.*trap nut<br/>rient.*trap pollut.*trap trap.*contam trap.*nutrient trap.*pollut sand.*trap trap<br/>.*sand trap.*sediment litter trap fish<br/>trap especial power.*generation electric.*generation generation<br/>plant generation facilit laboratory observ field observ lab observ special<br/>issue meadow beauty river beauty beautiful jacob spring<br/>beauty beautyberry carex carey personal care careo aquarium care lawn<br/>care careful exotic extrapolat askin pickerel invasive species iskin nuisance<br/>species overview in view of over-view over-<br/>view peltandra pelti pelto apelt peltu pelta pelte provid.*no clue provid.*<br/>notice provid.*basis provid.*expertise rarely temperature value biomass<br/>value nonprofit non-profit refur review bayview sensitive</p> |
| FEGS     | Fauna | Fauna    | exclude   | <p>flora plant flower root grass kelp seaweed vegetation mangrove reed cypress <br/>sphagnum cattail moss palm berry berries seeds fruit nuts tree sedge moss li<br/>chen forest pine oak cypress elm ash maple hickory hardwood cedar</p> | <p>fern shunt huntley huntington hunterdon skink salem mysella economus new<br/>market skink skink skin lesion skin condition strap sulfur specialist tradeoff trade-<br/>off transport workshop</p>                                                                                                                                                                                                                                                                                                                                                                                                                                                                                                                                                                                                                                                                                                                                                                                                                                                                                                                                                                                                                                                                                                                                                                                                                                                                                                                                                                                                                                                                                                                                            |

| Category | Class | SubClass | Word_type | S10 | S11 |
|----------|-------|----------|-----------|-----|-----|
|          |       |          |           |     |     |
| FEGS     | Fauna | Fauna    | near      |     |     |
|          |       |          |           |     |     |
| FEGS     | Fauna | Fauna    | exclude   |     |     |

| Category | Class | SubClass | Word_type | S12 | S13 |
|----------|-------|----------|-----------|-----|-----|
|          |       |          |           |     |     |
| FEGS     | Fauna | Fauna    | near      |     |     |
|          |       |          |           |     |     |
| FEGS     | Fauna | Fauna    | exclude   |     |     |

| Category | Class | SubClass | Word_type | S1                                                                                                                                                                                                                                 |
|----------|-------|----------|-----------|------------------------------------------------------------------------------------------------------------------------------------------------------------------------------------------------------------------------------------|
| FEGS     | FEGS  | FEGS     | include   | resource value valuable trading mitigat goods econom public access conserv protect tourism tourist recreation livelihood visitor<br>use stewards bounty bountiful                                                                  |
| FEGS     | FEGS  | FEGS     | near      | ecosystem environment natur estuar renewable bay ecological field aquatic marine water park coast shore land wetland the<br>reserve floodplain biological basin the region our region the area our area                            |
| FEGS     | FEGS  | FEGS     | exclude   | Department sewer service office division commission bay scallop lander landing landmark southland parking parker economical protection<br>agency environmentally temperature value biomass value the regional valuable tool        |
| FEGS     | Fiber | Fiber    | include   | fiber                                                                                                                                                                                                                              |
| FEGS     | Fiber | Fiber    | near      | provid service provision collect gather environment ecosystem natur subsist use benefit product industr mill harvest pottery goods                                                                                                 |
| FEGS     | Fiber | Fiber    | exclude   | fiberglass issues journal national.*park.*service elderberry 15.*visitor silvicultur cause focused optic million millimeter millennia milliliter millirem milligram m<br>iller mill.*creek reproduc productiv fiber content cotton |
| FEGS     | Fish  | Fish     | include   | fish seahorse aquaria aquarium seafood salmon shrimp oyster pike crab lobster mullet mussel bass herring grouper snapper alewife flounder abalone scallop clam geoduck mollusk                                                     |
| FEGS     | Fish  | Fish     | near      | indust commercial recreat artisan harvest collect gather stock sustain product manag.*future manag.*sustain manag.*stock catch dig nets traps                                                                                      |

| Category | Class | SubClass | Word_type | S2                                                                                                                                                                                                                                                                                                                                                                                                                                                                                                                                                                                                                                                                                                                                                                                                                                                                                                                                                                                                                                                                                                                                                                                                                                                                                                                                                                                                                         | S3                                |
|----------|-------|----------|-----------|----------------------------------------------------------------------------------------------------------------------------------------------------------------------------------------------------------------------------------------------------------------------------------------------------------------------------------------------------------------------------------------------------------------------------------------------------------------------------------------------------------------------------------------------------------------------------------------------------------------------------------------------------------------------------------------------------------------------------------------------------------------------------------------------------------------------------------------------------------------------------------------------------------------------------------------------------------------------------------------------------------------------------------------------------------------------------------------------------------------------------------------------------------------------------------------------------------------------------------------------------------------------------------------------------------------------------------------------------------------------------------------------------------------------------|-----------------------------------|
| FEGS     | FEGS  | FEGS     | include   | beneficial use living resource natural feature natural resource ecosystem service ecological service economic use commercial use recreational use cultural.*resource traditional use sustainable tourism                                                                                                                                                                                                                                                                                                                                                                                                                                                                                                                                                                                                                                                                                                                                                                                                                                                                                                                                                                                                                                                                                                                                                                                                                   |                                   |
| FEGS     | FEGS  | FEGS     | near      |                                                                                                                                                                                                                                                                                                                                                                                                                                                                                                                                                                                                                                                                                                                                                                                                                                                                                                                                                                                                                                                                                                                                                                                                                                                                                                                                                                                                                            |                                   |
| FEGS     | FEGS  | FEGS     | exclude   | department                                                                                                                                                                                                                                                                                                                                                                                                                                                                                                                                                                                                                                                                                                                                                                                                                                                                                                                                                                                                                                                                                                                                                                                                                                                                                                                                                                                                                 |                                   |
| FEGS     | Fiber | Fiber    | include   | salt hay reed grass marsh hay turpentine                                                                                                                                                                                                                                                                                                                                                                                                                                                                                                                                                                                                                                                                                                                                                                                                                                                                                                                                                                                                                                                                                                                                                                                                                                                                                                                                                                                   | vegetative cutting branch cutting |
| FEGS     | Fiber | Fiber    | near      | subsist mill paper fabric textile pottery goods                                                                                                                                                                                                                                                                                                                                                                                                                                                                                                                                                                                                                                                                                                                                                                                                                                                                                                                                                                                                                                                                                                                                                                                                                                                                                                                                                                            |                                   |
| FEGS     | Fiber | Fiber    | exclude   | grassroot grass-root paper mulberry sea grass freed mcreedy sea-grass eelgrass oyster.*grass seagrass grassland sea-grass decreed breed agreed haynes hay.*barn hayden cottonwood freed cottonail reedgrass hayan issues journal scotton invasive non.*native nonnative national.*park.*service elderberry 15.*visitor cause focused million millimeter millennia milliliter millirem milligram miller mill.*creek millet shrimp data dredg hopper farm government.*industr                                                                                                                                                                                                                                                                                                                                                                                                                                                                                                                                                                                                                                                                                                                                                                                                                                                                                                                                                |                                   |
| FEGS     | Fish  | Fish     | include   | fish seahorse aquaria aquarium seafood shrimp salmon oyster pike crab lobster mullet mussel bass herring grouper snapper alewife flounder abalone scallop clam geoduck                                                                                                                                                                                                                                                                                                                                                                                                                                                                                                                                                                                                                                                                                                                                                                                                                                                                                                                                                                                                                                                                                                                                                                                                                                                     | bait                              |
| FEGS     | Fish  | Fish     | near      | accomodat activit aesthetic ameniable amenit appreciat artisan artist asset attract beaut beneficial benefit bequest biodiversity bountiful bounty business buy care caring charisma cherish children collect comfort commercial commodities commodity goods concern conserv corporation critical dealer delicious desired desirable destination econom edible educat encourag endangered enhance enhancing enjoy encounter enthusiast experienc exploit extract families favorable favor feel festiv ceremon fur furs fur-bear furbear furbear future gather generation hallmark harvest healthy heritage hide hunt income indigenous.*people indian population indian people indigenous.*person industry initiative inspir interest job learn legacy leisure livelihood market meat native.*person native american observ opportunit participant participate pelt pick pleasant popular preserv products profession profit promote promotion purpose protect quality.*life rare recreat relax resource restor sale save saving sell sight skins special specimen spectacular sport steward subsist sustenance threatened together tours trade trading sustainabl tradition treasure tribal tribe unique valuable value valuing valuing view visit visitor watch well suited well-suited wonder allure alluring mystique option value lifeblood jewel extraordinary excellent amaze amazing stunning majestic spectacular | fish shrimp                       |

| Category | Class | SubClass | Word_type | S4                                                                                                                                                                     | S5                                                                                                                                       |
|----------|-------|----------|-----------|------------------------------------------------------------------------------------------------------------------------------------------------------------------------|------------------------------------------------------------------------------------------------------------------------------------------|
| FEGS     | FEGS  | FEGS     | include   |                                                                                                                                                                        |                                                                                                                                          |
| FEGS     | FEGS  | FEGS     | near      |                                                                                                                                                                        |                                                                                                                                          |
| FEGS     | FEGS  | FEGS     | exclude   |                                                                                                                                                                        |                                                                                                                                          |
| FEGS     | Fiber | Fiber    | include   |                                                                                                                                                                        |                                                                                                                                          |
| FEGS     | Fiber | Fiber    | near      |                                                                                                                                                                        |                                                                                                                                          |
| FEGS     | Fiber | Fiber    | exclude   |                                                                                                                                                                        |                                                                                                                                          |
| FEGS     | Fish  | Fish     | include   | fish seahorse aquaria aquarium seafood salmon shrimp oyster pike crab lobster mullet mussel bass herring grouper snapper alewife flounder abalone scallop clam geoduck | seafood fishery fisheries angler angling shellfish garden oyster garden shellfish farm oyster farm fishing fisherman fishermen shellfish |
| FEGS     | Fish  | Fish     | near      | essential habitat critical habitat feeding ground                                                                                                                      |                                                                                                                                          |

| Category | Class | SubClass | Word_type | S6                                                                                                                                                                                       | S7 |
|----------|-------|----------|-----------|------------------------------------------------------------------------------------------------------------------------------------------------------------------------------------------|----|
| FEGS     | FEGS  | FEGS     | include   |                                                                                                                                                                                          |    |
| FEGS     | FEGS  | FEGS     | near      |                                                                                                                                                                                          |    |
| FEGS     | FEGS  | FEGS     | exclude   |                                                                                                                                                                                          |    |
| FEGS     | Fiber | Fiber    | include   |                                                                                                                                                                                          |    |
| FEGS     | Fiber | Fiber    | near      |                                                                                                                                                                                          |    |
| FEGS     | Fiber | Fiber    | exclude   |                                                                                                                                                                                          |    |
| FEGS     | Fish  | Fish     | include   | wildstock wild.*stock stock.*wild wild.*catch catch.*wild wild.*caught caught.*wild                                                                                                      |    |
| FEGS     | Fish  | Fish     | near      | fish seahorse aquaria aquarium seafood salmon shrimp oyster pike crab lobster mullet mussel bass herring grouper snapper alewife flounder abalone scallop clam geoduck lake river stream |    |

| Category | Class | SubClass | Word_type | S8 | S9 |
|----------|-------|----------|-----------|----|----|
| FEGS     | FEGS  | FEGS     | include   |    |    |
| FEGS     | FEGS  | FEGS     | near      |    |    |
| FEGS     | FEGS  | FEGS     | exclude   |    |    |
| FEGS     | Fiber | Fiber    | include   |    |    |
| FEGS     | Fiber | Fiber    | near      |    |    |
| FEGS     | Fiber | Fiber    | exclude   |    |    |
| FEGS     | Fish  | Fish     | include   |    |    |
| FEGS     | Fish  | Fish     | near      |    |    |

| Category | Class | SubClass | Word_type | S10 | S11 |
|----------|-------|----------|-----------|-----|-----|
| FEGS     | FEGS  | FEGS     | include   |     |     |
| FEGS     | FEGS  | FEGS     | near      |     |     |
| FEGS     | FEGS  | FEGS     | exclude   |     |     |
| FEGS     | Fiber | Fiber    | include   |     |     |
| FEGS     | Fiber | Fiber    | near      |     |     |
| FEGS     | Fiber | Fiber    | exclude   |     |     |
| FEGS     | Fish  | Fish     | include   |     |     |
| FEGS     | Fish  | Fish     | near      |     |     |

| Category | Class | SubClass | Word_type | S12 | S13 |
|----------|-------|----------|-----------|-----|-----|
| FEGS     | FEGS  | FEGS     | include   |     |     |
| FEGS     | FEGS  | FEGS     | near      |     |     |
| FEGS     | FEGS  | FEGS     | exclude   |     |     |
| FEGS     | Fiber | Fiber    | include   |     |     |
| FEGS     | Fiber | Fiber    | near      |     |     |
| FEGS     | Fiber | Fiber    | exclude   |     |     |
| FEGS     | Fish  | Fish     | include   |     |     |
| FEGS     | Fish  | Fish     | near      |     |     |

| Category | Class | SubClass | Word_type | S1                                                                                                                                                                                                                                                                                                                                                                                                                                                                                                                                                                                                                                                                                                                                                                                                                                                                                                                                                                                                                                                                                                                                                                                                                                                                                                                                                                                                                               |
|----------|-------|----------|-----------|----------------------------------------------------------------------------------------------------------------------------------------------------------------------------------------------------------------------------------------------------------------------------------------------------------------------------------------------------------------------------------------------------------------------------------------------------------------------------------------------------------------------------------------------------------------------------------------------------------------------------------------------------------------------------------------------------------------------------------------------------------------------------------------------------------------------------------------------------------------------------------------------------------------------------------------------------------------------------------------------------------------------------------------------------------------------------------------------------------------------------------------------------------------------------------------------------------------------------------------------------------------------------------------------------------------------------------------------------------------------------------------------------------------------------------|
| FEGS     | Fish  | Fish     | exclude   | <p>oyster shells ambassador salmon falls indig reclam clami horseshoe crab oystercatcher agency askin pickerel by-product byproduct by product chid entrap strap sediment.*trap contam.*trap nutrient.*trap pollut.*trap trap.*contam trap.*nutrient trap.*pollut sand.*trap trap.*sand trap.*sediment litter trap especial power.*generation electric.*generation generation plant generation facilit laboratory observ field observ lab observ special issue meadow beauty river beauty beautiful jacob spring beauty beautyberry carex carey personal care careo aquarium care lawn care careful exotic extrapolat askin pickerel invasive species iskin nuisance species overview in view of over-view over-view peltandra pelti pelto apelt peltu pelta pelte provid.*no clue provid.*notice provid.*basis provid.*expertise rarely temperature value biomass value nonprofit non-profit refur review bayview sensitive fern shunt huntley huntington hunterdon sking saalem mysella economus newmarket skink skin lesion skin condition strap sulfur specialist tradeoff trade-off transport workshop clami pickerel oyster creek spike kingfisher fort fisher fish river</p>                                                                                                                                                                                                                                              |
| FEGS     | Flora | Flora    | include   | <p>flora plant flower root grass kelp seaweed vegetation mangrove reed cypress sphagnum cattail moss palm berry berries seeds fruit nuts tree sedge moss lichen pine oak cypress elm ash maple hickory hardwood cedar daffodil tulip</p>                                                                                                                                                                                                                                                                                                                                                                                                                                                                                                                                                                                                                                                                                                                                                                                                                                                                                                                                                                                                                                                                                                                                                                                         |
| FEGS     | Flora | Flora    | near      | <p>accomodat activit aesthetic ameniable amenit appreciat artisan artist asset attract beaut beneficial benefit bequest biodiversity bountiful bounty business buy care caring charisma cherish children collect comfort commercial commodities commodity goods concern conserv corporation critical dealer delicious desire desirable destination econom edible educat encourag endangered enhance enhancing enjoy encounter enthusiast experien exploit extract families favorable favor feel festiv ceremon fur furs fur-bear fur bear furbear future gather generation hallmark harvest healthy heritage hide hunt income indigenous.*people indian population indian people indigenous.*person industry initiative inspir interest job learn legacy leisure livelihood market meat native.*person native american observ opportunit participant participate pelt pick pleasant popular preserv products profession profit promote promotion purpose protect quality.*life rare recreat relax resource restor sale save saving sell sight skins special specimen spectacular sport steward subsist sustenance threatened together tours trade trading sustainabl tradition treasure tribal tribe unique valuable value valuing valuing view visit visitor watch well suited well-suited wonder allure alluring mystique option value lifeblood jewel extraordinary excellent amaze amazing stunning majestic spectacular</p> |

| Category | Class | SubClass | Word_type | S2                                                                                                                                                                                                                                                                                                                                                                                                                                                                                                                                                                                                                                                                                                                                                                                                                                                                                                                                                                                                                                                                                                                                                                                               | S3                                                                                                                                                                                                                                                                                                                                                                                                                                                                                                                                                                                                                                                                                                                                                                                                                                                                                                                                                                                                                                                                                                                                                                                                                                                                                                                                                                                                                                                                               |
|----------|-------|----------|-----------|--------------------------------------------------------------------------------------------------------------------------------------------------------------------------------------------------------------------------------------------------------------------------------------------------------------------------------------------------------------------------------------------------------------------------------------------------------------------------------------------------------------------------------------------------------------------------------------------------------------------------------------------------------------------------------------------------------------------------------------------------------------------------------------------------------------------------------------------------------------------------------------------------------------------------------------------------------------------------------------------------------------------------------------------------------------------------------------------------------------------------------------------------------------------------------------------------|----------------------------------------------------------------------------------------------------------------------------------------------------------------------------------------------------------------------------------------------------------------------------------------------------------------------------------------------------------------------------------------------------------------------------------------------------------------------------------------------------------------------------------------------------------------------------------------------------------------------------------------------------------------------------------------------------------------------------------------------------------------------------------------------------------------------------------------------------------------------------------------------------------------------------------------------------------------------------------------------------------------------------------------------------------------------------------------------------------------------------------------------------------------------------------------------------------------------------------------------------------------------------------------------------------------------------------------------------------------------------------------------------------------------------------------------------------------------------------|
| FEGS     | Fish  | Fish     | exclude   | oyster shells reclam clami horseshoe<br>crab oystercatcher agency askin pickerel by-product byproduct by<br>product chid entrap strap sediment.*trap contam.*trap nutrient.*trap pollut.*t<br>rap trap.*contam trap.*nutrient trap.*pollut sand.*trap trap.*sand trap.*sedim<br>ent litter trap especial power.*generation electric.*generation generation<br>plant generation facilit laboratory observ field observ lab observ special<br>issue meadow beauty river beauty beautiful jacob spring<br>beauty beautyberry carex carey personal care careo aquarium care lawn<br>care careful exotic extrapolat askin pickerel invasive species iskin nuisance<br>species overview in view of over-view over-<br>view peltandra pelti pelto apelt peltu pelta pelte provid.* no clue provid.*<br>notice provid.* basis provid.*expertise rarely temperature value biomass<br>value nonprofit non-profit refur review bayview sensitive<br>fern shunt huntley huntington hunterdon sking saalem mysella economus new<br>market skink skin lesion skin condition strap sulfur specialist tradeoff trade-<br>off transport workshop clami pickerel oyster creek kingfisher fort fisher fish<br>river |                                                                                                                                                                                                                                                                                                                                                                                                                                                                                                                                                                                                                                                                                                                                                                                                                                                                                                                                                                                                                                                                                                                                                                                                                                                                                                                                                                                                                                                                                  |
| FEGS     | Flora | Flora    | include   | cranberr berry berries seeds fruit nuts edible.*plant                                                                                                                                                                                                                                                                                                                                                                                                                                                                                                                                                                                                                                                                                                                                                                                                                                                                                                                                                                                                                                                                                                                                            | sav                                                                                                                                                                                                                                                                                                                                                                                                                                                                                                                                                                                                                                                                                                                                                                                                                                                                                                                                                                                                                                                                                                                                                                                                                                                                                                                                                                                                                                                                              |
| FEGS     | Flora | Flora    | near      | wild collect gather harvest pick subsist                                                                                                                                                                                                                                                                                                                                                                                                                                                                                                                                                                                                                                                                                                                                                                                                                                                                                                                                                                                                                                                                                                                                                         | accomodat activit aesthetic amenable amenit appreciat artisan artist asset att<br>ract beaut beneficial benefit bequest biodiversity bountiful bounty business b<br>uy care caring charisma cherish children collect comfort commercial commodit<br>ies commodity goods concern conserv corporation critical dealer delicious desi<br>red desirable destination econom edible educat encourag endangered enhance<br> enhancing enjoy encounter enthusiast experienc exploit extract families favor<br>able favor feel festiv ceremon  fur  furs fur-bear fur<br>bear furbear future gather generation hallmark harvest healthy heritage hide <br>hunt income indigenous.*people indian population indian<br>people indigenous.*person industry initiative inspir interest job learn legacy lei<br>sure livelihood market meat native.*person native<br>american observ opportunit participant participate pelt pick pleasant popular <br>preserv products profession profit promote promotion purpose protect quality<br>.*life rare recreat relax resource restor sale sell sight skins special specimen s<br>pectacular sport steward subsist sustenance threatened together tours trade t<br>rading sustainabl tradition treasure tribal tribe unique valuable value valuing v<br>iew visit visitor watch well suited well-<br>suited wonder allure alluring mystique option<br>value lifeblood jewel extraordinary excellent amaze amazing stunning majestic<br> spectacular |

| Category | Class | SubClass | Word_type | S4                                                                                                                                             | S5                                                      |
|----------|-------|----------|-----------|------------------------------------------------------------------------------------------------------------------------------------------------|---------------------------------------------------------|
|          |       |          |           |                                                                                                                                                |                                                         |
| FEGS     | Fish  | Fish     | exclude   | kingfisher fort fisher fish river                                                                                                              |                                                         |
| FEGS     | Flora | Flora    | include   | species of concern species of special concern endangered.*species threatened.*species species.*endangered species.*threatened protect.*species | native.*plant plant.*native native.*flora flora.*native |
|          |       |          |           |                                                                                                                                                |                                                         |
| FEGS     | Flora | Flora    | near      |                                                                                                                                                |                                                         |

| Category | Class | SubClass | Word_type | S6                                         | S7                                                                                                                                                                                                                                                                                                                                                                                                                                                                                                                                                                                                                                                                                                                                                                                                                                                                                                                                                                                                                                                                                                                                                                                                                                                                                                                                                                                                                                                                                                     |
|----------|-------|----------|-----------|--------------------------------------------|--------------------------------------------------------------------------------------------------------------------------------------------------------------------------------------------------------------------------------------------------------------------------------------------------------------------------------------------------------------------------------------------------------------------------------------------------------------------------------------------------------------------------------------------------------------------------------------------------------------------------------------------------------------------------------------------------------------------------------------------------------------------------------------------------------------------------------------------------------------------------------------------------------------------------------------------------------------------------------------------------------------------------------------------------------------------------------------------------------------------------------------------------------------------------------------------------------------------------------------------------------------------------------------------------------------------------------------------------------------------------------------------------------------------------------------------------------------------------------------------------------|
| FEGS     | Fish  | Fish     | exclude   | livestock wildlife wild animal spike clami |                                                                                                                                                                                                                                                                                                                                                                                                                                                                                                                                                                                                                                                                                                                                                                                                                                                                                                                                                                                                                                                                                                                                                                                                                                                                                                                                                                                                                                                                                                        |
| FEGS     | Flora | Flora    | include   | forestry                                   | marine.*species terrestrial.*species aquatic.*species                                                                                                                                                                                                                                                                                                                                                                                                                                                                                                                                                                                                                                                                                                                                                                                                                                                                                                                                                                                                                                                                                                                                                                                                                                                                                                                                                                                                                                                  |
| FEGS     | Flora | Flora    | near      |                                            | accomodat activit aesthetic amenable amenit appreciat artisan artist asset att<br>ract beaut beneficial benefit bequest biodiversity bountiful bounty business b<br>uy care caring charisma cherish children collect comfort commercial commodit<br>ies commodity goods concern conserv corporation critical dealer delicious desi<br>red desirable destination econom edible educat encourag endangered enhance<br> enhancing enjoy encounter enthusiast experienc exploit extract families favor<br>able favor feel festiv ceremon  fur   furs  fur-bear fur<br>bear furbear future gather generation hallmark harvest healthy heritage hide <br>hunt income indigenous.*people indian population indian<br>people indigenous.*person industry initiative inspir interest job learn legacy lei<br>sure livelihood market meat native.*person native<br>american observ opportunit participant participate pelt pick pleasant popular <br>preserv products profession profit promote promotion purpose protect quality<br>.*life rare recreat relax resource restor sale save saving sell sight skins special<br> specimen spectacular sport steward subsist sustenance threatened together t<br>ours trade trading sustainabl tradition treasure tribal tribe unique valuable val<br>ue valuing valuing view visit visitor watch well suited well-<br>suited wonder allure alluring mystique option<br>value lifeblood jewel extraordinary excellent amaze amazing stunning majestic<br> spectacular |

| Category | Class | SubClass | Word_type | S8 | S9 |
|----------|-------|----------|-----------|----|----|
| FEGS     | Fish  | Fish     | exclude   |    |    |
| FEGS     | Flora | Flora    | include   |    |    |
| FEGS     | Flora | Flora    | near      |    |    |

| Category | Class | SubClass | Word_type | S10 | S11 |
|----------|-------|----------|-----------|-----|-----|
| FEGS     | Fish  | Fish     | exclude   |     |     |
| FEGS     | Flora | Flora    | include   |     |     |
| FEGS     | Flora | Flora    | near      |     |     |

| Category | Class | SubClass | Word_type | S12 | S13 |
|----------|-------|----------|-----------|-----|-----|
| FEGS     | Fish  | Fish     | exclude   |     |     |
| FEGS     | Flora | Flora    | include   |     |     |
| FEGS     | Flora | Flora    | near      |     |     |

| Category | Class | SubClass | Word_type | S1                                                                                                                                                                                                                                                                                                                                                                                                                                                                                                                                                                                                                                                                                                                                                                                                                                                                                                                                                                                                                                                                                                                                                                                                                                                                                                                                                                                                                                                                                                                                                                                                                                                                                                                                                   |
|----------|-------|----------|-----------|------------------------------------------------------------------------------------------------------------------------------------------------------------------------------------------------------------------------------------------------------------------------------------------------------------------------------------------------------------------------------------------------------------------------------------------------------------------------------------------------------------------------------------------------------------------------------------------------------------------------------------------------------------------------------------------------------------------------------------------------------------------------------------------------------------------------------------------------------------------------------------------------------------------------------------------------------------------------------------------------------------------------------------------------------------------------------------------------------------------------------------------------------------------------------------------------------------------------------------------------------------------------------------------------------------------------------------------------------------------------------------------------------------------------------------------------------------------------------------------------------------------------------------------------------------------------------------------------------------------------------------------------------------------------------------------------------------------------------------------------------|
| FEGS     | Flora | Flora    | exclude   | <p>processing plant aguirre plant pauciflora plant.*upgrade upgrade.*plant planted planting plantation grassroot grass-root braintree package plant transplant power plant carene treatment plant invasive plant carex carey personal care careo aquarium care lawn care careful decreed breed hayden cottonwood freed reedgrass agreed elderberry cash category sewage sanitary acquatic management.*area fish wash dnr mcbp trash shoreline pineda pinellas legend pine.*island pine.*barren vash elmer elm st ashe coal ash mash sash cash bash overwhelm oakdale oakley croak coal.*ash delmarva fashion pineland barrier.*island water.*pollution soak pine.*beach over.*wheel med barrier.*beach ashore sand.*pine shorebird percent metals oakland silverside hash develm hairstreak crash pine.*hills ocean.*pine oak.*harbor oak.*ridge table figure characterized.*as cdmo unacceptable seed runoff pollut data erosion seem timber logging logger lumber dash Wash eash lash mash rash uash especial power.*generation electric.*generation generation plant generation facilit laboratory observ field observ lab observ special issue meadow beauty river beauty beautiful jacob spring beauty careful exotic extrapolat askin pickerel invasive species iskin nuisance species overview in view of over-view over-view peltandra pelti pelto apelt peltu pelta pelte pelte provid.* no clue provid.* notice provid.* basis provid.*expertise rarely temperature value biomass value nonprofit non-profit refur review bayview sensitive fern shunt huntley huntington hunterdon sking saalem mysella eonomus newmarket skink skin lesion skin condition strap sulfur specialist tradeoff trade-off transport workshop grass shrimp</p> |
| FEGS     | Fungi | Fungi    | include   | fungus fungi mushroom                                                                                                                                                                                                                                                                                                                                                                                                                                                                                                                                                                                                                                                                                                                                                                                                                                                                                                                                                                                                                                                                                                                                                                                                                                                                                                                                                                                                                                                                                                                                                                                                                                                                                                                                |
| FEGS     | Fungi | Fungi    | near      | <p>accomodat activit aesthetic amenable amenit appreciat artisan artist asset attract beaut beneficial benefit bequest biodiversity bountiful bounty business buy care caring charisma cherish children collect comfort commercial commodities commodity goods concern conserv corporation critical dealer delicious desired desirable destination eonom edible educat encourag endangered enhance enhancing enjoy encounter enthusiast experienc exploit extract families favorable favor feel festiv ceremon fur furs fur-bear fur bear furbear future gather generation hallmark harvest healthy heritage hide hunt income indigenous.*people indian population indian people indigenous.*person industry initiative inspir interest job learn legacy leisure livelihood market meat native.*person native american observ opportunit participant participate pelt pick pleasant popular preserv products profession profit promote promotion purpose protect quality.*life rare recreat relax resource restor sale save saving sell sight skins special specimen spectacular sport steward subsist sustenance threatened together tours trade trading sustainabl tradition treasure tribal tribe unique valuable value valuing view visit visitor watch well suited well-suited wonder allure alluring mystique option value lifeblood jewel extraordinary excellent amaze amazing stunning majestic spectacular</p>                                                                                                                                                                                                                                                                                                                             |
| FEGS     | Fungi | Fungi    | exclude   | <p>fungicide chemical oak.*death mushroomed agency askin pickerel by-product byproduct by product chid entrap strap sediment.*trap contam.*trap pollut.*trap trap.*contam trap.*pollut trap.*nutrient nutrient.*trap sand.*trap trap.*sand trap.*sediment litter trap fish trap especial power.*generation electric.*generation generation plant generation facilit laboratory observ field observ lab observ special issue meadow beauty river beauty beautiful jacob spring beauty beautyberry carex carey personal care careo aquarium care lawn care careful exotic extrapolat askin pickerel invasive species iskin nuisance species overview in view of over-view over-view peltandra pelti pelto apelt peltu pelta pelte pelta pelte provid.* no clue provid.* notice provid.* basis provid.*expertise rarely temperature value biomass value nonprofit non-profit refur review bayview sensitive fern shunt huntley huntington hunterdon sking saalem mysella eonomus newmarket skink skin lesion skin condition strap sulfur specialist tradeoff trade-off transport workshop</p>                                                                                                                                                                                                                                                                                                                                                                                                                                                                                                                                                                                                                                                           |
| FEGS     | Land  | Land     | include   | land habitat                                                                                                                                                                                                                                                                                                                                                                                                                                                                                                                                                                                                                                                                                                                                                                                                                                                                                                                                                                                                                                                                                                                                                                                                                                                                                                                                                                                                                                                                                                                                                                                                                                                                                                                                         |



| Category | Class | SubClass | Word_type | S4                                                                                                                                                                                                                                                                                                                                                                                                                     | S5                                        |
|----------|-------|----------|-----------|------------------------------------------------------------------------------------------------------------------------------------------------------------------------------------------------------------------------------------------------------------------------------------------------------------------------------------------------------------------------------------------------------------------------|-------------------------------------------|
| FEGS     | Flora | Flora    | exclude   | raptor fauna animal mammal wildlife bird owl fowl duck sparrow warbler plover falcon osprey hawk eagle pelican geese pidgeon pigeon turtle tortoise sea l whale dolphin porpoise manatee otter coral dragonfl insect beetle entomolo bug deer turkey quail waterfowl duck goose reptile alligator amphibian sala mander frog toad skink bat nutria raccoon hogs rabbit beaver rookery rookeri es butter horseshoe crab | pauciflora processing plant aguirre plant |
| FEGS     | Fungi | Fungi    | include   |                                                                                                                                                                                                                                                                                                                                                                                                                        |                                           |
| FEGS     | Fungi | Fungi    | near      |                                                                                                                                                                                                                                                                                                                                                                                                                        |                                           |
| FEGS     | Fungi | Fungi    | exclude   |                                                                                                                                                                                                                                                                                                                                                                                                                        |                                           |
| FEGS     | Land  | Land     | include   | land-loss trend land develop develop land developing land developed land                                                                                                                                                                                                                                                                                                                                               | unpaved parking land preserv              |

[illegible]

| Category | Class | SubClass | Word_type | S8 | S9 |
|----------|-------|----------|-----------|----|----|
|          |       |          |           |    |    |
| FEGS     | Flora | Flora    | exclude   |    |    |
| FEGS     | Fungi | Fungi    | include   |    |    |
|          |       |          |           |    |    |
| FEGS     | Fungi | Fungi    | near      |    |    |
|          |       |          |           |    |    |
| FEGS     | Fungi | Fungi    | exclude   |    |    |
| FEGS     | Land  | Land     | include   |    |    |

| Category | Class | SubClass | Word_type | S10 | S11 |
|----------|-------|----------|-----------|-----|-----|
|          |       |          |           |     |     |
| FEGS     | Flora | Flora    | exclude   |     |     |
| FEGS     | Fungi | Fungi    | include   |     |     |
|          |       |          |           |     |     |
| FEGS     | Fungi | Fungi    | near      |     |     |
|          |       |          |           |     |     |
| FEGS     | Fungi | Fungi    | exclude   |     |     |
| FEGS     | Land  | Land     | include   |     |     |

| Category | Class | SubClass | Word_type | S12 | S13 |
|----------|-------|----------|-----------|-----|-----|
|          |       |          |           |     |     |
| FEGS     | Flora | Flora    | exclude   |     |     |
| FEGS     | Fungi | Fungi    | include   |     |     |
|          |       |          |           |     |     |
| FEGS     | Fungi | Fungi    | near      |     |     |
|          |       |          |           |     |     |
| FEGS     | Fungi | Fungi    | exclude   |     |     |
| FEGS     | Land  | Land     | include   |     |     |

| Category | Class             | SubClass          | Word_type | S1                                                                                                                                                                                                                                                                                                                                                                                                                                                                                                                                                     |
|----------|-------------------|-------------------|-----------|--------------------------------------------------------------------------------------------------------------------------------------------------------------------------------------------------------------------------------------------------------------------------------------------------------------------------------------------------------------------------------------------------------------------------------------------------------------------------------------------------------------------------------------------------------|
| FEGS     | Land              | Land              | near      | smart growth residential develop commercial develop sustainable develop sustainable growth future develop new develop proposed develop compact develop convert filled drained ditched filling draining acquisition acquire reclaim reclamation conversion suitable for develop cleared for urban develop develop undisturb develop natural developing undisturb developing natural developed undisturb developed natural impact develop housing develop pattern of develop development pattern proposed development new construction replace replacing |
|          |                   |                   |           | upland landing landmark overland landscap highland mainland england landing landmark cleveland maryland portland cumberland lander oakland stormwater rainwater workshop greenland gland system.*land landbird landing landmark poorly drained well-drained drainage basin drain.*watershed watershed.*drain drain.*groundwater groundwater.*drain reservoir.*drain drain.*reservoir                                                                                                                                                                   |
| FEGS     | Natural Materials | Natural Materials | include   | natural.*material material.*natural material.*environment material.*ecosystem ecosystem.*material environment.*material aquatic.*material material.*aquatic                                                                                                                                                                                                                                                                                                                                                                                            |
| FEGS     | Natural Materials | Natural Materials | near      | collect amass accumulate gather artistic inspir invent imagin ornament jewelry pottery                                                                                                                                                                                                                                                                                                                                                                                                                                                                 |
|          |                   |                   |           |                                                                                                                                                                                                                                                                                                                                                                                                                                                                                                                                                        |

| Category | Class             | SubClass          | Word_type | S2                                                                                                                                                                                                                                                                                                                                                                                                                                                                                                                                                                                                                                                                                                                                                                                                                                                                                                                                       | S3                                                                                                                                                                                                                                                                                                                                                                                                                                                                                                                                   |
|----------|-------------------|-------------------|-----------|------------------------------------------------------------------------------------------------------------------------------------------------------------------------------------------------------------------------------------------------------------------------------------------------------------------------------------------------------------------------------------------------------------------------------------------------------------------------------------------------------------------------------------------------------------------------------------------------------------------------------------------------------------------------------------------------------------------------------------------------------------------------------------------------------------------------------------------------------------------------------------------------------------------------------------------|--------------------------------------------------------------------------------------------------------------------------------------------------------------------------------------------------------------------------------------------------------------------------------------------------------------------------------------------------------------------------------------------------------------------------------------------------------------------------------------------------------------------------------------|
| FEGS     | Land              | Land              | near      |                                                                                                                                                                                                                                                                                                                                                                                                                                                                                                                                                                                                                                                                                                                                                                                                                                                                                                                                          | smart growth residential develop commercial develop sustainable develop sustainable growth future develop new develop proposed develop compact develop convert filled drained ditched filling draining acquisition acquire reclaim reclamation conversion suitable for develop cleared for urban develop develop undisturb develop natural developing undisturb developing natural developed undisturb developed natural impact develop housing develop pattern of develop development pattern proposed development new construction |
| FEGS     | Land              | Land              | exclude   | frontier dock nantasket issues contaminat highhigh wbwp.*aww permit.*requirement application.*conference 15.*visitor                                                                                                                                                                                                                                                                                                                                                                                                                                                                                                                                                                                                                                                                                                                                                                                                                     | low tide high tide tidal poorly drained well-drained drainage basin drain.*watershed watershed.*drain drain.*groundwater groundwater.*drain reservoir.*drain drain.*reservoir                                                                                                                                                                                                                                                                                                                                                        |
| FEGS     | Natural Materials | Natural Materials | include   | sand shells acorns stick clay rock fossil stone bones feather                                                                                                                                                                                                                                                                                                                                                                                                                                                                                                                                                                                                                                                                                                                                                                                                                                                                            | ornament jewelry pottery brick                                                                                                                                                                                                                                                                                                                                                                                                                                                                                                       |
| FEGS     | Natural Materials | Natural Materials | near      | aesthetic artisan artist beneficial benefit bequest bountiful bounty business buy cherish children collect comfort commercial commodities commodity goods concern corporation dealer desired desirable destination econom educat enhance enhancing encourag enjoy encounter enthusiast experienc exploit extract families favorable favor feel festiv ceremon future gather generation hallmark harvest heritage income indigenous.*people indian population indian people indigenous.*person industry initiative inspir interest job learn legacy leisure livelihood market native.*person native american observ opportunit participant participate pick pleasant popular preserve products profession profit promote promotion purpose resource restor sale sell special sport steward subsist trade trading sustainabl tradition treasure tribal tribe valuable value valuing well suited well-suited pottery brick ornament jewelry | natur organic environment ecosystem                                                                                                                                                                                                                                                                                                                                                                                                                                                                                                  |

| Category | Class             | SubClass          | Word_type | S4                                                                                                                                                                                           | S5               |
|----------|-------------------|-------------------|-----------|----------------------------------------------------------------------------------------------------------------------------------------------------------------------------------------------|------------------|
|          |                   |                   |           |                                                                                                                                                                                              |                  |
| FEGS     | Land              | Land              | near      |                                                                                                                                                                                              |                  |
| FEGS     | Land              | Land              | exclude   |                                                                                                                                                                                              |                  |
| FEGS     | Natural Materials | Natural Materials | include   | natural material maple.*syrup maple.*sugar honey shell mining collecting coral collect coral coral.*jewelry jewelry.*coral souvenir.*coral coral.*souvenir natural object mining mine quarry | fill geotube bag |
|          |                   |                   |           |                                                                                                                                                                                              |                  |
| FEGS     | Natural Materials | Natural Materials | near      | sand gravel rock stone                                                                                                                                                                       |                  |

| Category | Class             | SubClass          | Word_type | S6                                                              | S7                |
|----------|-------------------|-------------------|-----------|-----------------------------------------------------------------|-------------------|
|          |                   |                   |           |                                                                 |                   |
| FEGS     | Land              | Land              | near      |                                                                 |                   |
| FEGS     | Land              | Land              | exclude   |                                                                 |                   |
| FEGS     | Natural Materials | Natural Materials | include   | material.*place place.*material material.*dredg dredg.*material | firewood campfire |
|          |                   |                   |           |                                                                 |                   |
| FEGS     | Natural Materials | Natural Materials | near      | benef enhance enhancing create creation creating                |                   |

| Category | Class             | SubClass          | Word_type | S8 | S9 |
|----------|-------------------|-------------------|-----------|----|----|
|          |                   |                   |           |    |    |
| FEGS     | Land              | Land              | near      |    |    |
| FEGS     | Land              | Land              | exclude   |    |    |
| FEGS     | Natural Materials | Natural Materials | include   |    |    |
|          |                   |                   |           |    |    |
| FEGS     | Natural Materials | Natural Materials | near      |    |    |

| Category | Class             | SubClass          | Word_type | S10 | S11 |
|----------|-------------------|-------------------|-----------|-----|-----|
| FEGS     | Land              | Land              | near      |     |     |
|          |                   |                   |           |     |     |
| FEGS     | Land              | Land              | exclude   |     |     |
| FEGS     | Natural Materials | Natural Materials | include   |     |     |
|          |                   |                   |           |     |     |
| FEGS     | Natural Materials | Natural Materials | near      |     |     |

| Category | Class             | SubClass          | Word_type | S12 | S13 |
|----------|-------------------|-------------------|-----------|-----|-----|
| FEGS     | Land              | Land              | near      |     |     |
|          |                   |                   | exclude   |     |     |
| FEGS     | Natural Materials | Natural Materials | include   |     |     |
| FEGS     | Natural Materials | Natural Materials | near      |     |     |
|          |                   |                   |           |     |     |

| Category | Class             | SubClass          | Word_type | S1                                                                                                                                                                                                                                                                                                                                                                                                                                                                                                                                                                                                                                                                                                                                                                                                                                                                                                                                                                                                                                                                                                        |
|----------|-------------------|-------------------|-----------|-----------------------------------------------------------------------------------------------------------------------------------------------------------------------------------------------------------------------------------------------------------------------------------------------------------------------------------------------------------------------------------------------------------------------------------------------------------------------------------------------------------------------------------------------------------------------------------------------------------------------------------------------------------------------------------------------------------------------------------------------------------------------------------------------------------------------------------------------------------------------------------------------------------------------------------------------------------------------------------------------------------------------------------------------------------------------------------------------------------|
|          |                   |                   |           | recycled material informational material educational material instructional material organic material exhibit material department.*of environmental.*protection.*agency conservation.*service manag monitor data research degrad loss regulat federal law enforce office pollut protect project agenc govern fund stress critical restor conserv pesticide invasive nuisance non.*native nonnative goal runoff protect estuaries.*national.*significance debris strateg damag land.*use analy evalu brown.*tide maintenance assess impact investigate policy official development inform zoning trend use.*conflict research.*ecosystem.*assessment guideline objective critical.*issue resource.*conservation.*development catalog tours.*attendees opportunity.*business andrewsrock research assess monitor resource.*program percent action.*plan invasive nonnative action.*item debris issue figure15 policies director.*natural mitigation.*bank seamless.*protect land.*manag plan 15.*visitor natural.*flow nutrient dred workshop sediment hab imaging sample migrant highhigh report inventory |
| FEGS     | Natural Materials | Natural Materials | exclude   |                                                                                                                                                                                                                                                                                                                                                                                                                                                                                                                                                                                                                                                                                                                                                                                                                                                                                                                                                                                                                                                                                                           |
| FEGS     | Open Space        | Open Space        | include   | open.*space space.*open green.*space space.*green nature.*preserv open area wildland aesthetic appreciat heritage together enjoy recreation commercial view beaut value inspir relax leisure econom activit feel opportunit tour visit bounty beautiful enhance enhancing                                                                                                                                                                                                                                                                                                                                                                                                                                                                                                                                                                                                                                                                                                                                                                                                                                 |
| FEGS     | Open Space        | Open Space        | near      |                                                                                                                                                                                                                                                                                                                                                                                                                                                                                                                                                                                                                                                                                                                                                                                                                                                                                                                                                                                                                                                                                                           |
|          |                   |                   |           | lose loss lost restrict federal govern manage stress preserv conserv law fund acqui permit plan grant text bylaw municipalit analy legislat map sprawl program conference steward goal action osrd decreas develop population division emission coliform highhigh management.*issue forsythe jug.*ba answers.*question seagrass program plan legislat division streetscape street.*scape highhigh management.*issue forsythe jug.*bay answers.*question seagrass conserv plan legislat program manage municipal department control dissemination office agenc maintain parking.*lot ocean.*park street.*park parks.*committee parking.*facility coliform division.*park highhigh management.*issue forsythe jug.*bay kendall interactive.*designer highhigh management.*issue forsythe jug.*bay answers.*question seagrass 15.*visitor parking parker parked developed open space.*palustrine palustrine.*developed open space developed open space.*medium intensity developed medium intensity developed.*developed open space                                                                          |
| FEGS     | Open Space        | Open Space        | exclude   |                                                                                                                                                                                                                                                                                                                                                                                                                                                                                                                                                                                                                                                                                                                                                                                                                                                                                                                                                                                                                                                                                                           |
| FEGS     | Pollinators       | Pollinators       | include   | pollinat pollen                                                                                                                                                                                                                                                                                                                                                                                                                                                                                                                                                                                                                                                                                                                                                                                                                                                                                                                                                                                                                                                                                           |
| FEGS     | Pollinators       | Pollinators       | near      |                                                                                                                                                                                                                                                                                                                                                                                                                                                                                                                                                                                                                                                                                                                                                                                                                                                                                                                                                                                                                                                                                                           |
|          |                   |                   |           |                                                                                                                                                                                                                                                                                                                                                                                                                                                                                                                                                                                                                                                                                                                                                                                                                                                                                                                                                                                                                                                                                                           |
| FEGS     | Pollinators       | Pollinators       | exclude   | ssc lack.*educat pollen history cross-pollin                                                                                                                                                                                                                                                                                                                                                                                                                                                                                                                                                                                                                                                                                                                                                                                                                                                                                                                                                                                                                                                              |

| Category | Class             | SubClass          | Word_type | S2                                                                                                                                                                                                                                                                                                                                                                                                                                                                                                                                                                                                                                                                                                                                                                                                                                                                                                                                                                                                                                                                                                                                                                                                                                                                                                                                                                                                                                                                                                                                                                                                                                                                                                                                                                                                                                                                                                                         | S3 |
|----------|-------------------|-------------------|-----------|----------------------------------------------------------------------------------------------------------------------------------------------------------------------------------------------------------------------------------------------------------------------------------------------------------------------------------------------------------------------------------------------------------------------------------------------------------------------------------------------------------------------------------------------------------------------------------------------------------------------------------------------------------------------------------------------------------------------------------------------------------------------------------------------------------------------------------------------------------------------------------------------------------------------------------------------------------------------------------------------------------------------------------------------------------------------------------------------------------------------------------------------------------------------------------------------------------------------------------------------------------------------------------------------------------------------------------------------------------------------------------------------------------------------------------------------------------------------------------------------------------------------------------------------------------------------------------------------------------------------------------------------------------------------------------------------------------------------------------------------------------------------------------------------------------------------------------------------------------------------------------------------------------------------------|----|
|          |                   |                   |           | clay brook boneset sand dollar sand coco stone lab fossil fuel sand<br>barrier sandflat sand flat sand<br>accumulation sticker nonstick capstone keystone cornerstone touchstone miles<br>tone rocky mountain gabion rockcress rockfish larock rock crab shamrock rock<br>shrimp rock cancer rockport rockaway rocky Rock<br>Cove rockingham bedrock rock fish rock jasmine rockport rockaway rocky Rock<br>Cove sediment channel hammock legend dune management.*description report<br>t inventory list.*structure burnunit burn.*unit facilit forest.*manag gis docume<br>nt data spit transport site adverse bedrock honey bee clay<br>creek clayton sandwich runoff sandwort sandine ersand esand dsand saddun<br>e sandy sand dune sandspur sander ssand sandwort sandpiper sand<br>filter esand dsand sand pine sandusky sand<br>grass sandplain sandown thousand carex carey personal care careo aquarium<br>care lawn<br>care careful wood.*smoke sediment channel preservativ pah hab hazard highh<br>igh agency askin pickerel by-product byproduct by<br>product chid entrap strap sediment.*trap sand.*trap trap.*sand trap.*sediment<br> litter trap fish trap especial power.*generation electric.*generation generation<br>plant generation facilit laboratory observ field observ lab observ special<br>issue meadow beauty river beauty beautiful jacob spring<br>beauty careful exotic extrapolat askin pickerel invasive species iskin nuisance<br>species overview in view of over-view over-<br>view peltandra pelti pelto apelt peltu pelta pelte provid.* no clue provid.*<br>notice provid.* basis provid.*expertise rarely temperature value biomass<br>value nonprofit non-profit refur review bayview sensitive<br>fern shunt huntley huntington hunterdon sking saalem mysella economy new<br>market skink skin lesion skin condition strap sulfur specialist tradeoff trade-<br>off transport |    |
| FEGS     | Natural Materials | Natural Materials | exclude   | figure15 policies loss.*value 15.*visitor highhigh ornamental.*species                                                                                                                                                                                                                                                                                                                                                                                                                                                                                                                                                                                                                                                                                                                                                                                                                                                                                                                                                                                                                                                                                                                                                                                                                                                                                                                                                                                                                                                                                                                                                                                                                                                                                                                                                                                                                                                     |    |
| FEGS     | Open Space        | Open Space        | include   | open space vast expanse green space greenspace                                                                                                                                                                                                                                                                                                                                                                                                                                                                                                                                                                                                                                                                                                                                                                                                                                                                                                                                                                                                                                                                                                                                                                                                                                                                                                                                                                                                                                                                                                                                                                                                                                                                                                                                                                                                                                                                             |    |
| FEGS     | Open Space        | Open Space        | near      |                                                                                                                                                                                                                                                                                                                                                                                                                                                                                                                                                                                                                                                                                                                                                                                                                                                                                                                                                                                                                                                                                                                                                                                                                                                                                                                                                                                                                                                                                                                                                                                                                                                                                                                                                                                                                                                                                                                            |    |
|          |                   |                   |           | developed open space.*palustrine palustrine.*developed open space developed<br>open space.*medium intensity developed medium intensity<br>developed.*developed open space                                                                                                                                                                                                                                                                                                                                                                                                                                                                                                                                                                                                                                                                                                                                                                                                                                                                                                                                                                                                                                                                                                                                                                                                                                                                                                                                                                                                                                                                                                                                                                                                                                                                                                                                                  |    |
| FEGS     | Open Space        | Open Space        | exclude   |                                                                                                                                                                                                                                                                                                                                                                                                                                                                                                                                                                                                                                                                                                                                                                                                                                                                                                                                                                                                                                                                                                                                                                                                                                                                                                                                                                                                                                                                                                                                                                                                                                                                                                                                                                                                                                                                                                                            |    |
| FEGS     | Pollinators       | Pollinators       | include   | bee butter hummingbird bat                                                                                                                                                                                                                                                                                                                                                                                                                                                                                                                                                                                                                                                                                                                                                                                                                                                                                                                                                                                                                                                                                                                                                                                                                                                                                                                                                                                                                                                                                                                                                                                                                                                                                                                                                                                                                                                                                                 |    |
| FEGS     | Pollinators       | Pollinators       | near      | flower flora crop garden farm agricultur native plant<br>cnobee been beet beetle tombigbee okeecnobee beepiant ssc lack.*educat be<br>et bee county bee<br>education document ssc lack.*educat microp batbing bato batk tbat batsto ba<br>ta abat bate bath bati batu batr combat butterfish butterfly<br>orchid batt buttercup butter clam butterwort abutter buttermilk butterfly-<br>pea bat star butterfly fish butterweed hummingbird flower beec beev bee<br>fly beea                                                                                                                                                                                                                                                                                                                                                                                                                                                                                                                                                                                                                                                                                                                                                                                                                                                                                                                                                                                                                                                                                                                                                                                                                                                                                                                                                                                                                                                |    |
| FEGS     | Pollinators       | Pollinators       | exclude   |                                                                                                                                                                                                                                                                                                                                                                                                                                                                                                                                                                                                                                                                                                                                                                                                                                                                                                                                                                                                                                                                                                                                                                                                                                                                                                                                                                                                                                                                                                                                                                                                                                                                                                                                                                                                                                                                                                                            |    |

| Category | Class             | SubClass          | Word_type | S4 | S5                                                                                                                                                                                                                                                                                                                                                                                                                                                                                                                                                                                                                                                                                                                                                                                                                                                                                                                                                                                                                                                                                                                                                                                                                                                                                                     |
|----------|-------------------|-------------------|-----------|----|--------------------------------------------------------------------------------------------------------------------------------------------------------------------------------------------------------------------------------------------------------------------------------------------------------------------------------------------------------------------------------------------------------------------------------------------------------------------------------------------------------------------------------------------------------------------------------------------------------------------------------------------------------------------------------------------------------------------------------------------------------------------------------------------------------------------------------------------------------------------------------------------------------------------------------------------------------------------------------------------------------------------------------------------------------------------------------------------------------------------------------------------------------------------------------------------------------------------------------------------------------------------------------------------------------|
|          |                   |                   |           |    | <p>sand flat sand barrier sandflat sand accumulation popcorn<br/> bag capstone keystone cornerstone touchstone milestone rockport rocky<br/> mountain gabion rockcress rockfish larock rock crab shamrock rock shrimp rock<br/> cancer rockport rockaway rocky Rock Cove rockingham bedrock rock fish rock<br/> jasmine rockport rockaway rocky Rock<br/> Cove sediment channel hammock legend dune management.*description report inventory list.*structure burnunit burn.*unit facilit forest.*manag gis document data spit transport site adverse bedrock honey bee clay</p> <p>honey<br/> bee suckle locust dew mahoney mesquite timber lumber log remediat.*min data.*min determining examining determine examine promine mineral fluminea omine minen mineu amine plaquemine ermin minello deter-min deter-min minea post-min division smine reclaim.*min min.*reclaim min.*reclam reclam.*min under-min lettuce</p> <p>creek clayton sandwich runoff sandwort sandine ersand esand dsand sandy sandsand sand dune sandspur sander ssand sandwort sandpiper sand filter esand dsand sand pine sandusky sand<br/> grass sandplain sandown thousand carex carey personal<br/> care careo careful aquarium care lawn<br/> care wood.*smoke sediment channel preservativ pah hab hazard highhigh</p> |
| FEGS     | Natural Materials | Natural Materials | exclude   |    |                                                                                                                                                                                                                                                                                                                                                                                                                                                                                                                                                                                                                                                                                                                                                                                                                                                                                                                                                                                                                                                                                                                                                                                                                                                                                                        |
| FEGS     | Open Space        | Open Space        | include   |    |                                                                                                                                                                                                                                                                                                                                                                                                                                                                                                                                                                                                                                                                                                                                                                                                                                                                                                                                                                                                                                                                                                                                                                                                                                                                                                        |
| FEGS     | Open Space        | Open Space        | near      |    |                                                                                                                                                                                                                                                                                                                                                                                                                                                                                                                                                                                                                                                                                                                                                                                                                                                                                                                                                                                                                                                                                                                                                                                                                                                                                                        |
|          |                   |                   |           |    |                                                                                                                                                                                                                                                                                                                                                                                                                                                                                                                                                                                                                                                                                                                                                                                                                                                                                                                                                                                                                                                                                                                                                                                                                                                                                                        |
| FEGS     | Open Space        | Open Space        | exclude   |    |                                                                                                                                                                                                                                                                                                                                                                                                                                                                                                                                                                                                                                                                                                                                                                                                                                                                                                                                                                                                                                                                                                                                                                                                                                                                                                        |
| FEGS     | Pollinators       | Pollinators       | include   |    |                                                                                                                                                                                                                                                                                                                                                                                                                                                                                                                                                                                                                                                                                                                                                                                                                                                                                                                                                                                                                                                                                                                                                                                                                                                                                                        |
| FEGS     | Pollinators       | Pollinators       | near      |    |                                                                                                                                                                                                                                                                                                                                                                                                                                                                                                                                                                                                                                                                                                                                                                                                                                                                                                                                                                                                                                                                                                                                                                                                                                                                                                        |
|          |                   |                   |           |    |                                                                                                                                                                                                                                                                                                                                                                                                                                                                                                                                                                                                                                                                                                                                                                                                                                                                                                                                                                                                                                                                                                                                                                                                                                                                                                        |
| FEGS     | Pollinators       | Pollinators       | exclude   |    |                                                                                                                                                                                                                                                                                                                                                                                                                                                                                                                                                                                                                                                                                                                                                                                                                                                                                                                                                                                                                                                                                                                                                                                                                                                                                                        |

| Category | Class             | SubClass          | Word_type | S6                                                                                                                             | S7 |
|----------|-------------------|-------------------|-----------|--------------------------------------------------------------------------------------------------------------------------------|----|
|          |                   |                   |           |                                                                                                                                |    |
| FEGS     | Natural Materials | Natural Materials | exclude   | recycled material informational material educational material instructional material organic material exhibit material recreat |    |
| FEGS     | Open Space        | Open Space        | include   |                                                                                                                                |    |
| FEGS     | Open Space        | Open Space        | near      |                                                                                                                                |    |
|          |                   |                   |           |                                                                                                                                |    |
| FEGS     | Open Space        | Open Space        | exclude   |                                                                                                                                |    |
| FEGS     | Pollinators       | Pollinators       | include   |                                                                                                                                |    |
| FEGS     | Pollinators       | Pollinators       | near      |                                                                                                                                |    |
|          |                   |                   |           |                                                                                                                                |    |
| FEGS     | Pollinators       | Pollinators       | exclude   |                                                                                                                                |    |

| Category | Class             | SubClass          | Word_type | S8 | S9 |
|----------|-------------------|-------------------|-----------|----|----|
|          |                   |                   |           |    |    |
| FEGS     | Natural Materials | Natural Materials | exclude   |    |    |
| FEGS     | Open Space        | Open Space        | include   |    |    |
| FEGS     | Open Space        | Open Space        | near      |    |    |
|          |                   |                   |           |    |    |
| FEGS     | Open Space        | Open Space        | exclude   |    |    |
| FEGS     | Pollinators       | Pollinators       | include   |    |    |
| FEGS     | Pollinators       | Pollinators       | near      |    |    |
|          |                   |                   |           |    |    |
| FEGS     | Pollinators       | Pollinators       | exclude   |    |    |

| Category | Class             | SubClass          | Word_type | S10 | S11 |
|----------|-------------------|-------------------|-----------|-----|-----|
|          |                   |                   |           |     |     |
| FEGS     | Natural Materials | Natural Materials | exclude   |     |     |
| FEGS     | Open Space        | Open Space        | include   |     |     |
| FEGS     | Open Space        | Open Space        | near      |     |     |
|          |                   |                   |           |     |     |
| FEGS     | Open Space        | Open Space        | exclude   |     |     |
| FEGS     | Pollinators       | Pollinators       | include   |     |     |
| FEGS     | Pollinators       | Pollinators       | near      |     |     |
|          |                   |                   |           |     |     |
| FEGS     | Pollinators       | Pollinators       | exclude   |     |     |

| Category | Class             | SubClass          | Word_type | S12 | S13 |
|----------|-------------------|-------------------|-----------|-----|-----|
|          |                   |                   |           |     |     |
| FEGS     | Natural Materials | Natural Materials | exclude   |     |     |
| FEGS     | Open Space        | Open Space        | include   |     |     |
| FEGS     | Open Space        | Open Space        | near      |     |     |
|          |                   |                   |           |     |     |
| FEGS     | Open Space        | Open Space        | exclude   |     |     |
| FEGS     | Pollinators       | Pollinators       | include   |     |     |
| FEGS     | Pollinators       | Pollinators       | near      |     |     |
|          |                   |                   |           |     |     |
| FEGS     | Pollinators       | Pollinators       | exclude   |     |     |

| Category | Class                 | SubClass              | Word_type | S1                                                                                                                                                                                                                                                                                                                                                                                                                                                                                                                                                                                                                                                                                                                                                                                                                                                                                                                                                                                                                                                                                                                                                                                                                                  |
|----------|-----------------------|-----------------------|-----------|-------------------------------------------------------------------------------------------------------------------------------------------------------------------------------------------------------------------------------------------------------------------------------------------------------------------------------------------------------------------------------------------------------------------------------------------------------------------------------------------------------------------------------------------------------------------------------------------------------------------------------------------------------------------------------------------------------------------------------------------------------------------------------------------------------------------------------------------------------------------------------------------------------------------------------------------------------------------------------------------------------------------------------------------------------------------------------------------------------------------------------------------------------------------------------------------------------------------------------------|
| FEGS     | Presence of the Envir | Presence of the Envir | include   | essay contest art<br> accomodat activit ameniable appreciat attract beneficial benefit bequest biodiversity bountiful bounty business buy care caring charisma cherish children commercial concern conserv corporation critical desired desirable destination econom educat encourag enhance enhancing enjoy encounter enthusiast experience families favorable favor feel festiv ceremon future generation hallmark healthy heritage income indigenous.*people indian population indian people indigenous.*person industry initiative inspir interest job learn legacy leisure livelihood native.*person native american opportunit participant participate pleasant popular preserv pride profession profit promote promotion purpose protect quality.*life recreat relax restor save saving special sport steward together tours sustainabl tradition treasure tribal tribe unique valuable value valuing visit visitor well suited well-suited wonder allure alluring mystique option value lifeblood jewel extraordinary excellent amaze amazing stunning majestic spectacular way of life sense of place tour guide                                                                                                           |
| FEGS     | Presence of the Envir | Presence of the Envir | near      | ecosystem environment natur estuar bay ecological outdoor wilderness watershed coast shore wetland parks region land out-of doors                                                                                                                                                                                                                                                                                                                                                                                                                                                                                                                                                                                                                                                                                                                                                                                                                                                                                                                                                                                                                                                                                                   |
| FEGS     | Presence of the Envir | Presence of the Envir | exclude   | landfill product goods environmentally aerial photograph digitiz orthophotograph bay scallop agency askin pickerel by-product byproduct by-product chid entrap strap sediment.*trap contam.*trap pollut.*trap trap.*contam trap.*pollut trap.*nutrient nutrient.*trap sand.*trap trap.*sand trap.*sediment litter trap fish trap especial power.*generation electric.*generation generation plant generation facilit laboratory observ field observ lab observ special issue meadow beauty river beauty beautiful jacob spring beauty beautyberry carex carey personal care careo aquarium care lawn care careful exotic extrapolat askin pickerel invasive species iskin nuisance species overview in view of over-view over-view peltandra pelti pelto apelt peltu pelta pelte provid.*no clue provid.*notice provid.*basis provid.*expertise rarely temperature value biomass value nonprofit non-profit refur review bayview sensitive fern shunt huntley huntington hunterdon sking saalem mysella eonomus newmarket skink skin lesion skin condition strap sulfur specialist tradeoff trade-off transport workshop regional interested part toxic of concern toxics of concern contaminant of concern contaminants of concern |
| FEGS     | Soil                  | Soil                  | include   | soil dirt                                                                                                                                                                                                                                                                                                                                                                                                                                                                                                                                                                                                                                                                                                                                                                                                                                                                                                                                                                                                                                                                                                                                                                                                                           |
| FEGS     | Soil                  | Soil                  | near      | quality decompos replenish resource productivity microbe microorg fung rich health nutrient fertile drainage farm agricultur suitable suitability moisture capacity arable condition good prime production productive well-drained formation organic                                                                                                                                                                                                                                                                                                                                                                                                                                                                                                                                                                                                                                                                                                                                                                                                                                                                                                                                                                                |

| Category | Class                 | SubClass                      | Word_type | S2                                                                                                                                                                                                                                                                                                                                                                                                                                                                                                                                                    | S3                                                                                                                                                                                                                                                                                                                                                                                                                                                                                                                                                                                                                                                                                                                                                                                                                                                                                                                                                                                                                                                 |
|----------|-----------------------|-------------------------------|-----------|-------------------------------------------------------------------------------------------------------------------------------------------------------------------------------------------------------------------------------------------------------------------------------------------------------------------------------------------------------------------------------------------------------------------------------------------------------------------------------------------------------------------------------------------------------|----------------------------------------------------------------------------------------------------------------------------------------------------------------------------------------------------------------------------------------------------------------------------------------------------------------------------------------------------------------------------------------------------------------------------------------------------------------------------------------------------------------------------------------------------------------------------------------------------------------------------------------------------------------------------------------------------------------------------------------------------------------------------------------------------------------------------------------------------------------------------------------------------------------------------------------------------------------------------------------------------------------------------------------------------|
| FEGS     | Presence of the Envir | Presence of the Envir         | include   | hike hiking rock<br>climb bike biking bicycl camping camper camps campground outing sightsee beach.*activit sight-see beach.*go picnic snowmobil skiing sledding ski area ski resort snow sport trail rec.*hunt sport.*hunt hunt.*rec hunt.*sport off-road vehicle nature tour outdoor program environmental program nature photograph outdoor photog local photog outdoor writ nature writ environmental writ waterfront marina field trip interpretive tour interpretive program interpretive material boardwalk ecotouris eco-touris field activit | research scientific science scientist                                                                                                                                                                                                                                                                                                                                                                                                                                                                                                                                                                                                                                                                                                                                                                                                                                                                                                                                                                                                              |
| FEGS     | Presence of the Envir | Presence of the Envir near    |           |                                                                                                                                                                                                                                                                                                                                                                                                                                                                                                                                                       | improve.*learn enhance.*learn learn.*improve learn.*enhance improve.*knowledge enhance.*knowledge knowledge.*improve knowledge.*enhance permit opportunit encourag acomodat attract interest initiative promote reference site specimen.*collect sample.*collect data.*collect collect.*specimen collect.*sample collect.*data specimen.*gather sample.*gather data.*gather gather.*specimen gather.*sample gather.*data collect.*research research.*collect scien.*collect collect.*scien                                                                                                                                                                                                                                                                                                                                                                                                                                                                                                                                                         |
| FEGS     | Presence of the Envir | Presence of the Envir exclude |           | campaign suppl campbell salmon.*camp highhigh management.*issue forsythe jug.*bay answers.*question 15.*visitor steelhead trailer traillii hitchhike ladder passage barrier scenic view camp.*dresser camp.*mckee zostera                                                                                                                                                                                                                                                                                                                             |                                                                                                                                                                                                                                                                                                                                                                                                                                                                                                                                                                                                                                                                                                                                                                                                                                                                                                                                                                                                                                                    |
| FEGS     | Soil                  | Soil                          | include   | soil dirt                                                                                                                                                                                                                                                                                                                                                                                                                                                                                                                                             | soil dirt                                                                                                                                                                                                                                                                                                                                                                                                                                                                                                                                                                                                                                                                                                                                                                                                                                                                                                                                                                                                                                          |
| FEGS     | Soil                  | Soil                          | near      | promot.*research research.*promot promot.*science science.*promot science.*potential potential.*science research.*potential potential.*research science.*purpose purpose.*science research.*purpose purpose.*research improve.*knowledge enhance.*knowledge knowledge.*improve improve.*learn enhance.*learn learn.*improve learn.*enhance                                                                                                                                                                                                            | accomodat ameniable amenit appreciat asset attract beneficial benefit bequest bountiful bounty business buy collect comfort commercial commodities commodity goods concern conserv corporation critical desired desirable destination econom educat encourag enhance enhancing enjoy encounter enthusiast experience exploit extract families favorable favor feel festiv ceremon future gather generation hallmark harvest healthy heritage income indigenous.*people indian population indian people indigenous.*person industry initiative inspir interest job learn legacy leisure livelihood native.*person native american opportunit participen participate pleasant popular preserv products profession profit promote promotion purpose protect quality.*life rare resource restor sale save saving sell special steward subsist sustenance together sustenance purpose.*science research.*purpose purpose.*research improve.*knowledge enhance.*knowledge knowledge.*improve improve.*learn enhance.*learn learn.*improve learn.*enhance |

| Category | Class                 | SubClass              | Word_type | S4                                                                                                                                                                                                                                                             | S5                                                                                                                                                                                                                                                                                                                                                                                                                                                                                                                                                                                                                                                                                                                                                                                                                                                                                                                                                                                                             |
|----------|-----------------------|-----------------------|-----------|----------------------------------------------------------------------------------------------------------------------------------------------------------------------------------------------------------------------------------------------------------------|----------------------------------------------------------------------------------------------------------------------------------------------------------------------------------------------------------------------------------------------------------------------------------------------------------------------------------------------------------------------------------------------------------------------------------------------------------------------------------------------------------------------------------------------------------------------------------------------------------------------------------------------------------------------------------------------------------------------------------------------------------------------------------------------------------------------------------------------------------------------------------------------------------------------------------------------------------------------------------------------------------------|
| FEGS     | Presence of the Envir | Presence of the Envir | include   | flood storm shoreline coastal dune wave erosion hazard                                                                                                                                                                                                         | nitrogen carbon air atmosphere water sediment erosion                                                                                                                                                                                                                                                                                                                                                                                                                                                                                                                                                                                                                                                                                                                                                                                                                                                                                                                                                          |
| FEGS     | Presence of the Envir | Presence of the Envir | near      | buffer filter control protect retain retention attenuat mitigat                                                                                                                                                                                                | fixation sink replenish recycle sequestration remove removal service improve filter purify buffer clean clear natural.*process process.*natural sequester natural.*treat treat.*natural                                                                                                                                                                                                                                                                                                                                                                                                                                                                                                                                                                                                                                                                                                                                                                                                                        |
| FEGS     | Presence of the Envir | Presence of the Envir | exclude   | related.*actions action.*plan 15.*visitor applicant non.*native flood.*hazard.*control dredg mussel oyster mollusk restore county.*control control.*district filter.*strip bmp sewage pollut discharge impervious potential.*prob potential.*issue cfda diking | ciceet pollut total.*nitrogen.*loading tmdl hydrocarbon ciceet pollut goal plan implement problem impact challenge action manage assess department water.*quality agency inhibit monitor load treatment data mandat develop act test activit criteria measur inform filter hydrocarbon tmdl regulat radiocarbon toxic algal algae hypoxia eutrophic septic pollution contam metal excess discharge gas brown.*tide investigat pcb nonpoint non.*point concentration storm.*water stormwater carbonate slough parameter sample 15.*visitor pair fair air yam air plant chair questionnaire airborne affair millionaire dairy act airshed National.*Weather.*Service impair repair topic federal belleair tmdl air.*act ciceet prairie airport clean.*air.*act national.*air.*standard airplane airstrip muck regulat.*air Air Resource Specialist Clean Air Bond potato dair air force www Air Resources Lab air rifle air condition airfield rural atmosphere cooperative atmosphere welcoming clean water act |
| FEGS     | Soil                  | Soil                  | include   |                                                                                                                                                                                                                                                                |                                                                                                                                                                                                                                                                                                                                                                                                                                                                                                                                                                                                                                                                                                                                                                                                                                                                                                                                                                                                                |
| FEGS     | Soil                  | Soil                  | near      |                                                                                                                                                                                                                                                                |                                                                                                                                                                                                                                                                                                                                                                                                                                                                                                                                                                                                                                                                                                                                                                                                                                                                                                                                                                                                                |

| Category | Class                 | SubClass              | Word_type | S6                                                                                                                                                                                                                                                                                                                                                                                                                                                     | S7                                                                                                                                                                                                                                                                                                                                                                                                           |
|----------|-----------------------|-----------------------|-----------|--------------------------------------------------------------------------------------------------------------------------------------------------------------------------------------------------------------------------------------------------------------------------------------------------------------------------------------------------------------------------------------------------------------------------------------------------------|--------------------------------------------------------------------------------------------------------------------------------------------------------------------------------------------------------------------------------------------------------------------------------------------------------------------------------------------------------------------------------------------------------------|
| FEGS     | Presence of the Envir | Presence of the Envir | include   | absorb.*pollut filter.*pollut clean.*air purify.*air remove.*pollut reduce.*pollut reduce.*smog remove.*smog corridor shade shading stabiliz filter.*sediment groundwater improve.*water clarif filter.*water clean.*air purify.*air buffer filter control protect retain retention fixation sink replenish recycle sequestration sequester filter purify buffer clean natural.*process process.*natural buffer.*erosion natural.*treat treat.*natural | bioswale bio-swale rain.*garden bioretention wind.*break break.*wind denitrif absorb.*pollut filter.*pollut purify.*air remove.*smog filter.*sediment filter.*water purify.*air natural.*process process.*natural natur.*filter filter.*natural natur.*filtrat filtrat.*natural infiltrate infiltration drainfield sequester carbon carbon sequest buffer.*erosion purify.*water urban buffer carbon capture |
| FEGS     | Presence of the Envir | Presence of the Envir | near      | tree forest vegetat pine oak cypress elm ash maple hickory hardwood riparian canopy tree forest wetland natural vegetat plants flora marsh green estuar land stream river                                                                                                                                                                                                                                                                              |                                                                                                                                                                                                                                                                                                                                                                                                              |
| FEGS     | Presence of the Envir | Presence of the Envir | exclude   | transplant nightshade marshfield marshall braintree in the process dash Wash eash lash mash rash uash cash delineation turf pesticide fungicide fertilizer street clean water act clean air act                                                                                                                                                                                                                                                        | restor drain train brain grain                                                                                                                                                                                                                                                                                                                                                                               |
| FEGS     | Soil                  | Soil                  | include   |                                                                                                                                                                                                                                                                                                                                                                                                                                                        |                                                                                                                                                                                                                                                                                                                                                                                                              |
| FEGS     | Soil                  | Soil                  | near      |                                                                                                                                                                                                                                                                                                                                                                                                                                                        |                                                                                                                                                                                                                                                                                                                                                                                                              |

| Category | Class                 | SubClass                   | Word_type | S8                        | S9 |
|----------|-----------------------|----------------------------|-----------|---------------------------|----|
| FEGS     | Presence of the Envir | Presence of the Envir      | include   | buffer                    |    |
| FEGS     | Presence of the Envir | Presence of the Envir near |           | visual sound erosion zone |    |
| FEGS     | Presence of the Envir | Presence of the Envir      | exclude   |                           |    |
| FEGS     | Soil                  | Soil                       | include   |                           |    |
| FEGS     | Soil                  | Soil                       | near      |                           |    |

| Category | Class                 | SubClass                      | Word_type | S10 | S11 |
|----------|-----------------------|-------------------------------|-----------|-----|-----|
| FEGS     | Presence of the Envir | Presence of the Envir         | include   |     |     |
| FEGS     | Presence of the Envir | Presence of the Envir near    |           |     |     |
| FEGS     | Presence of the Envir | Presence of the Envir exclude |           |     |     |
| FEGS     | Soil                  | Soil                          | include   |     |     |
| FEGS     | Soil                  | Soil                          | near      |     |     |

| Category | Class                 | SubClass                      | Word_type | S12 | S13 |
|----------|-----------------------|-------------------------------|-----------|-----|-----|
| FEGS     | Presence of the Envir | Presence of the Envir         | include   |     |     |
| FEGS     | Presence of the Envir | Presence of the Envir near    |           |     |     |
| FEGS     | Presence of the Envir | Presence of the Envir exclude |           |     |     |
| FEGS     | Soil                  | Soil                          | include   |     |     |
| FEGS     | Soil                  | Soil                          | near      |     |     |

| Category | Class             | SubClass          | Word_type | S1                                                                                                                                                                                                                                                                                                                                                                                                                                                                                                                                                                                                                                                                                                                                                                                                                                                                                                                      |
|----------|-------------------|-------------------|-----------|-------------------------------------------------------------------------------------------------------------------------------------------------------------------------------------------------------------------------------------------------------------------------------------------------------------------------------------------------------------------------------------------------------------------------------------------------------------------------------------------------------------------------------------------------------------------------------------------------------------------------------------------------------------------------------------------------------------------------------------------------------------------------------------------------------------------------------------------------------------------------------------------------------------------------|
| FEGS     | Soil              | Soil              | exclude   | infertile unproductive poor disturbed anaerobic drainfield drainage basin drainage ditch substrate filter retention buffer infiltration runoff sedimentation nonpoint categor implement eelgrass oyster.*grass seagrass problem impact particle challenger action manage goal sediment.*trap contam.*trap pollut.*trap trap.*contam trap.*pollut sand.*trap trap.*sand assess department water.*quality agency inhibit monitor load treatment conserv data mandat develop act test activit compound criteria measur inform filter tmdl metal regulat hydrocarbon radiocarbon construct toxic discharge transport contamin impair guide stud pollution contamin regulat nonpoint non.*point research septic bulkhead seafood exceed deplete water.*clarity standard index target program marine.*sediment.*trap contam.*trap pollut.*trap trap.*contam trap.*pollut sand.*trap trap.*sand deposit bottom sedime resuspen |
| FEGS     | Sounds and Scents | Sounds and Scents | include   | sound                                                                                                                                                                                                                                                                                                                                                                                                                                                                                                                                                                                                                                                                                                                                                                                                                                                                                                                   |
| FEGS     | Sounds and Scents | Sounds and Scents | near      | listen hear sensation sensory auditory noise audible                                                                                                                                                                                                                                                                                                                                                                                                                                                                                                                                                                                                                                                                                                                                                                                                                                                                    |
| FEGS     | Sounds and Scents | Sounds and Scents | exclude   | buffer listening session long manage management program alternative technology protocol habitat study measure debris involv crescent puget.*sound.*action sound.*practice disruptive 15.*visitor glisten noxious unpleasant excessive unnecessary hearing heart pollut listening shear hear appeal disruptive disturb                                                                                                                                                                                                                                                                                                                                                                                                                                                                                                                                                                                                   |
| FEGS     | Substrate         | Substrate         | include   | substrate creat.*surface provid.*surface                                                                                                                                                                                                                                                                                                                                                                                                                                                                                                                                                                                                                                                                                                                                                                                                                                                                                |
| FEGS     | Substrate         | Substrate         | near      | construct benefit nourish replenish stabiliz econom produce create value valuable valuing restor base support suitable deposit                                                                                                                                                                                                                                                                                                                                                                                                                                                                                                                                                                                                                                                                                                                                                                                          |

| Category | Class             | SubClass          | Word_type | S2                                                                                                                                                                                                                                                                                                                                                                                                                                                                                                                                                                                     | S3                                                                                                                                                                                                                                                                                                                                                                                                                                                                                                                                                                                                                                                                                                                                                                                                                                                                                                                                                                                                                                                                                                                                                                                                                                                                                                                                                                                                                                                                                                                                                                                                                                                                                                                                                                                                                                                                                                                                                                                                                                                                                                                                                                                                                                                                                                                                                                                                                                                                                                                                                                                                                                                                                                                                                                                                                         |
|----------|-------------------|-------------------|-----------|----------------------------------------------------------------------------------------------------------------------------------------------------------------------------------------------------------------------------------------------------------------------------------------------------------------------------------------------------------------------------------------------------------------------------------------------------------------------------------------------------------------------------------------------------------------------------------------|----------------------------------------------------------------------------------------------------------------------------------------------------------------------------------------------------------------------------------------------------------------------------------------------------------------------------------------------------------------------------------------------------------------------------------------------------------------------------------------------------------------------------------------------------------------------------------------------------------------------------------------------------------------------------------------------------------------------------------------------------------------------------------------------------------------------------------------------------------------------------------------------------------------------------------------------------------------------------------------------------------------------------------------------------------------------------------------------------------------------------------------------------------------------------------------------------------------------------------------------------------------------------------------------------------------------------------------------------------------------------------------------------------------------------------------------------------------------------------------------------------------------------------------------------------------------------------------------------------------------------------------------------------------------------------------------------------------------------------------------------------------------------------------------------------------------------------------------------------------------------------------------------------------------------------------------------------------------------------------------------------------------------------------------------------------------------------------------------------------------------------------------------------------------------------------------------------------------------------------------------------------------------------------------------------------------------------------------------------------------------------------------------------------------------------------------------------------------------------------------------------------------------------------------------------------------------------------------------------------------------------------------------------------------------------------------------------------------------------------------------------------------------------------------------------------------------|
|          |                   |                   |           |                                                                                                                                                                                                                                                                                                                                                                                                                                                                                                                                                                                        | <p>infertile unproductive poor disturbed anaerobic drainfield substrate filter retention buffer infiltration runoff sedimentation nonpoint category implement eelgrass oyster.*grass seagrass problem impact particle challenge action manage goal sediment.*trap contam.*trap pollut.*trap trap.*contam trap.*pollut sand.*trap trap.*sand assess department water.*quality agency inhibit monitor load treatment conserv data mandat develop act test activit compound criteria measure inform filter tmdl metal regulat hydrocarbon radiocarbon construct toxic discharge transport contamin impair guide stud pollution contamin regulat nonpoint non.*point research septic bulkhead seafood exceed deplete water.*clarity standard index target program marine.*sediment.*trap contam.*trap pollut.*trap trap.*contam trap.*pollut sand.*trap trap.*sand deposit bottom sediment resuspend agency askin pickere by-product byproduct byproduct chid entrap strap sediment.*trap contam.*trap pollut.*trap trap.*contam trap.*pollut sand.*trap trap.*sand trap.*sediment litter trap fish trap especial power.*generation electric.*generation generation</p> <p>drainfield substrate filter retention buffer infiltration runoff sedimentation nonpoint category implement eelgrass oyster.*grass seagrass problem impact particle challenge action manage goal sediment.*trap contam.*trap pollut.*trap trap.*contam trap.*pollut sand.*trap trap.*sand assess department water.*quality agency inhibit monitor load treatment conserv data mandat develop act test activit compound criteria measure inform filter tmdl metal regulat hydrocarbon radiocarbon construct toxic discharge transport contamin impair guide stud pollution contamin regulat nonpoint non.*point research septic bulkhead seafood exceed deplete water.*clarity standard index target program marine.*sediment.*trap contam.*trap pollut.*trap trap.*contam trap.*pollut sand.*trap trap.*sand trap.*sediment litter trap fish trap especial power.*generation electric.*generation generation</p> <p>plant generation facility laboratory observ field observ lab observ special issue meadow beauty river beauty beautiful jacob spring beauty beautyberry carex carey personal care careo aquarium care lawn care careful exotic extrapolat askin pickere invasive species iskin nuisance species overview in view of over-view over-view peltandra pelti pelto apelt peltu pelta pelte provid.*no clue provid.*notice provid.*basis provid.*expertise rarely temperature value biomass value nonprofit non-profit refur review bayview sensitive fern shunt huntley huntington hunterdon sking salem mysella economus newmarket skink skin lesion skin condition strap sulfur specialist tradeoff trade-off transport workshop</p> |
| FEGS     | Soil              | Soil              | exclude   |                                                                                                                                                                                                                                                                                                                                                                                                                                                                                                                                                                                        |                                                                                                                                                                                                                                                                                                                                                                                                                                                                                                                                                                                                                                                                                                                                                                                                                                                                                                                                                                                                                                                                                                                                                                                                                                                                                                                                                                                                                                                                                                                                                                                                                                                                                                                                                                                                                                                                                                                                                                                                                                                                                                                                                                                                                                                                                                                                                                                                                                                                                                                                                                                                                                                                                                                                                                                                                            |
| FEGS     | Sounds and Scents | Sounds and Scents | include   | scent sensory olfactory auditory smell listen noise aroma audible odor fragrant fragrance                                                                                                                                                                                                                                                                                                                                                                                                                                                                                              | listen noise                                                                                                                                                                                                                                                                                                                                                                                                                                                                                                                                                                                                                                                                                                                                                                                                                                                                                                                                                                                                                                                                                                                                                                                                                                                                                                                                                                                                                                                                                                                                                                                                                                                                                                                                                                                                                                                                                                                                                                                                                                                                                                                                                                                                                                                                                                                                                                                                                                                                                                                                                                                                                                                                                                                                                                                                               |
|          |                   |                   |           | environment ecosystem natur flora flower plant berry berries estuary beach bird.*sing sing.*bird song.*bird bird.*song croak chirp rustl splash thunder song bird.*sing sing.*bird song.*bird bird.*song croak chirp rustle rustling splash thunder waves ocean natur cricket insect wildlife environ bird wood forest grass comfort enjoy pleasant                                                                                                                                                                                                                                    | under song waves ocean cricket insect wildlife environ bird wood forest grass cicada katydid cricket birds singing howl frog                                                                                                                                                                                                                                                                                                                                                                                                                                                                                                                                                                                                                                                                                                                                                                                                                                                                                                                                                                                                                                                                                                                                                                                                                                                                                                                                                                                                                                                                                                                                                                                                                                                                                                                                                                                                                                                                                                                                                                                                                                                                                                                                                                                                                                                                                                                                                                                                                                                                                                                                                                                                                                                                                               |
| FEGS     | Sounds and Scents | Sounds and Scents | near      |                                                                                                                                                                                                                                                                                                                                                                                                                                                                                                                                                                                        |                                                                                                                                                                                                                                                                                                                                                                                                                                                                                                                                                                                                                                                                                                                                                                                                                                                                                                                                                                                                                                                                                                                                                                                                                                                                                                                                                                                                                                                                                                                                                                                                                                                                                                                                                                                                                                                                                                                                                                                                                                                                                                                                                                                                                                                                                                                                                                                                                                                                                                                                                                                                                                                                                                                                                                                                                            |
|          |                   |                   |           | transplant polycyclic grassroot grass-root aromaticum aromatic hydrocarbon buffer listening session fluorescent quiescent crescent audubon 15.*visitor noxious unpleasant using increasing rising losing accessing dressing crossing disposing promising passing proposing isinglass licensing assessing raising single foreclosing purchase collapsing processing data monitor measure crucial glisten excessive unnecessary hearing heart pollut shear hear appeal disruptive disturb eschent pigeonwing odora delairea odore odoru odori odorv ethofum theodor crab-scented brittle | grassroot grass-root buffer listening session fluorescent quiescent crescent audubon 15.*visitor noxious unpleasant using increasing rising losing accessing dressing crossing disposing promising passing proposing isinglass licensing assessing raising single foreclosing purchase collapsing processing data monitor measure crucial glisten excessive unnecessary hearing heart pollut shear hear appeal disruptive disturb eschent                                                                                                                                                                                                                                                                                                                                                                                                                                                                                                                                                                                                                                                                                                                                                                                                                                                                                                                                                                                                                                                                                                                                                                                                                                                                                                                                                                                                                                                                                                                                                                                                                                                                                                                                                                                                                                                                                                                                                                                                                                                                                                                                                                                                                                                                                                                                                                                  |
| FEGS     | Sounds and Scents | Sounds and Scents | exclude   |                                                                                                                                                                                                                                                                                                                                                                                                                                                                                                                                                                                        |                                                                                                                                                                                                                                                                                                                                                                                                                                                                                                                                                                                                                                                                                                                                                                                                                                                                                                                                                                                                                                                                                                                                                                                                                                                                                                                                                                                                                                                                                                                                                                                                                                                                                                                                                                                                                                                                                                                                                                                                                                                                                                                                                                                                                                                                                                                                                                                                                                                                                                                                                                                                                                                                                                                                                                                                                            |
| FEGS     | Substrate         | Substrate         | include   | sand beach                                                                                                                                                                                                                                                                                                                                                                                                                                                                                                                                                                             | oyster.*reef                                                                                                                                                                                                                                                                                                                                                                                                                                                                                                                                                                                                                                                                                                                                                                                                                                                                                                                                                                                                                                                                                                                                                                                                                                                                                                                                                                                                                                                                                                                                                                                                                                                                                                                                                                                                                                                                                                                                                                                                                                                                                                                                                                                                                                                                                                                                                                                                                                                                                                                                                                                                                                                                                                                                                                                                               |
| FEGS     | Substrate         | Substrate         | near      | nourish replenish restor                                                                                                                                                                                                                                                                                                                                                                                                                                                                                                                                                               | construct benefit nourish replenish stabiliz econom commercial produce create value valuable valuing restor provid                                                                                                                                                                                                                                                                                                                                                                                                                                                                                                                                                                                                                                                                                                                                                                                                                                                                                                                                                                                                                                                                                                                                                                                                                                                                                                                                                                                                                                                                                                                                                                                                                                                                                                                                                                                                                                                                                                                                                                                                                                                                                                                                                                                                                                                                                                                                                                                                                                                                                                                                                                                                                                                                                                         |

| Category | Class             | SubClass          | Word_type | S4                                                  | S5                                                                                                                                                                                                                                                                                                                                                                                                                                                 |
|----------|-------------------|-------------------|-----------|-----------------------------------------------------|----------------------------------------------------------------------------------------------------------------------------------------------------------------------------------------------------------------------------------------------------------------------------------------------------------------------------------------------------------------------------------------------------------------------------------------------------|
| FEGS     | Soil              | Soil              | exclude   |                                                     |                                                                                                                                                                                                                                                                                                                                                                                                                                                    |
| FEGS     | Sounds and Scents | Sounds and Scents | include   | rural atmosphere serene serenity owl call bird call | hear                                                                                                                                                                                                                                                                                                                                                                                                                                               |
| FEGS     | Sounds and Scents | Sounds and Scents | near      |                                                     | bird.*sing sing.*bird song.*bird bird.*song croak chirp rustle rustling splash thunder song waves ocean cricket insect cicada katydid cricket birds wind singing howl frog noise sound audible                                                                                                                                                                                                                                                     |
| FEGS     | Sounds and Scents | Sounds and Scents | exclude   |                                                     | the sound Puget sound croaker buffer listening session fluorescent quiescent crescent audubon 15.*visitor noxious unpleasant using increasing rising losing accessing dressing crossing disposing promising passing proposing isinglass licensing assessing raising single foreclosing purchasing collapsing processing data monitor measur crucial glisten excessive unnecessary hearing heart pollut shear hear appeal disruptive disturb escent |
| FEGS     | Substrate         | Substrate         | include   | substrate creat.*surface provid.*surface            | substrate creat.*surface provid.*surface stabiliz base                                                                                                                                                                                                                                                                                                                                                                                             |
| FEGS     | Substrate         | Substrate         | near      | farm agriculture aquacultur hatchery garden         | clay chalk bedrock limestone granite marble shells reef                                                                                                                                                                                                                                                                                                                                                                                            |

| Category | Class             | SubClass          | Word_type | S6                                                                                                                                                                                                                                                                                                                                                                                                                                                                                                    | S7                                                     |
|----------|-------------------|-------------------|-----------|-------------------------------------------------------------------------------------------------------------------------------------------------------------------------------------------------------------------------------------------------------------------------------------------------------------------------------------------------------------------------------------------------------------------------------------------------------------------------------------------------------|--------------------------------------------------------|
|          |                   |                   |           |                                                                                                                                                                                                                                                                                                                                                                                                                                                                                                       |                                                        |
| FEGS     | Soil              | Soil              | exclude   |                                                                                                                                                                                                                                                                                                                                                                                                                                                                                                       |                                                        |
| FEGS     | Sounds and Scents | Sounds and Scents | include   | bird.*sing sing.*bird song.*bird bird.*song croak chirp rustle rustling splash so<br>ng cricket cicada katydid singing noise howl                                                                                                                                                                                                                                                                                                                                                                     | odor smell                                             |
| FEGS     | Sounds and Scents | Sounds and Scents | near      | enjoy pleasant watch observ audible                                                                                                                                                                                                                                                                                                                                                                                                                                                                   | ameliorate mitigat concern                             |
| FEGS     | Sounds and Scents | Sounds and Scents | exclude   | croaker rsing nsing ssing asing esing osing ising using ysing buffer listening<br>session fluorescent quiescent crescent audubon 15.*visitor noxious unpleasant<br> using increasing rising losing accessing dressing crossing disposing promising <br>passing proposing isinglass licensing assessing raising single foreclosing purcha<br>sing collapsing processing data monitor measur crucial glisten excessive unnec<br>cesary hearing heart pollut shear hear appeal disruptive disturb escent | odora delairea odore odoru odori odorv ethofum theodor |
| FEGS     | Substrate         | Substrate         | include   | muck.*estuar estuar.*muck muck.*wetland wetland.*muck                                                                                                                                                                                                                                                                                                                                                                                                                                                 |                                                        |
| FEGS     | Substrate         | Substrate         | near      | important vital importance essential critical                                                                                                                                                                                                                                                                                                                                                                                                                                                         |                                                        |

| Category | Class             | SubClass          | Word_type | S8 | S9 |
|----------|-------------------|-------------------|-----------|----|----|
|          |                   |                   |           |    |    |
| FEGS     | Soil              | Soil              | exclude   |    |    |
| FEGS     | Sounds and Scents | Sounds and Scents | include   |    |    |
| FEGS     | Sounds and Scents | Sounds and Scents | near      |    |    |
| FEGS     | Sounds and Scents | Sounds and Scents | exclude   |    |    |
| FEGS     | Substrate         | Substrate         | include   |    |    |
| FEGS     | Substrate         | Substrate         | near      |    |    |

| Category | Class             | SubClass          | Word_type | S10 | S11 |
|----------|-------------------|-------------------|-----------|-----|-----|
|          |                   |                   |           |     |     |
| FEGS     | Soil              | Soil              | exclude   |     |     |
| FEGS     | Sounds and Scents | Sounds and Scents | include   |     |     |
|          |                   |                   |           |     |     |
| FEGS     | Sounds and Scents | Sounds and Scents | near      |     |     |
|          |                   |                   |           |     |     |
| FEGS     | Sounds and Scents | Sounds and Scents | exclude   |     |     |
| FEGS     | Substrate         | Substrate         | include   |     |     |
|          |                   |                   |           |     |     |
| FEGS     | Substrate         | Substrate         | near      |     |     |

| Category | Class             | SubClass          | Word_type | S12 | S13 |
|----------|-------------------|-------------------|-----------|-----|-----|
|          |                   |                   |           |     |     |
| FEGS     | Soil              | Soil              | exclude   |     |     |
| FEGS     | Sounds and Scents | Sounds and Scents | include   |     |     |
| FEGS     | Sounds and Scents | Sounds and Scents | near      |     |     |
| FEGS     | Sounds and Scents | Sounds and Scents | exclude   |     |     |
| FEGS     | Substrate         | Substrate         | include   |     |     |
| FEGS     | Substrate         | Substrate         | near      |     |     |

| Category | Class      | SubClass   | Word_type | S1                                                                                                                                                                                                                                                                                                                                                                                                                                                                                                                                                                                                                                                                                                                                                                                                                                                                                                                                                                                                                                                                                                      |
|----------|------------|------------|-----------|---------------------------------------------------------------------------------------------------------------------------------------------------------------------------------------------------------------------------------------------------------------------------------------------------------------------------------------------------------------------------------------------------------------------------------------------------------------------------------------------------------------------------------------------------------------------------------------------------------------------------------------------------------------------------------------------------------------------------------------------------------------------------------------------------------------------------------------------------------------------------------------------------------------------------------------------------------------------------------------------------------------------------------------------------------------------------------------------------------|
| FEGS     | Substrate  | Substrate  | exclude   | artificial substrate substrateg surface water surface flow surface-water substrateg change priority municipalit www contaminat pollut toxic toxin salamander claytonia permit report goal study dredg monitor metal identif project inform creek construction sewer waste marblemount durante.*park dnrec boring barrier.*island manag.*plan identify 15.*visitor groundwater water suppl nursery spawn background groundwork impervious water quality groundcover ground cover lightning disposal middle ground middleground mining staging                                                                                                                                                                                                                                                                                                                                                                                                                                                                                                                                                            |
| FEGS     | Timber     | Timber     | include   | timber logging lumber                                                                                                                                                                                                                                                                                                                                                                                                                                                                                                                                                                                                                                                                                                                                                                                                                                                                                                                                                                                                                                                                                   |
| FEGS     | Timber     | Timber     | near      |                                                                                                                                                                                                                                                                                                                                                                                                                                                                                                                                                                                                                                                                                                                                                                                                                                                                                                                                                                                                                                                                                                         |
| FEGS     | Timber     | Timber     | exclude   | timber<br>oat clogging woody invasive nonnative non.*native manage plan goal legislat fish threat.*watershed watershed.*threat threat.*habitat habitat.*threat harmful marine http sewage sanitary aquatic plastic management.*area runoff stormwater dredg greek ocean sea coast septic university mcbp landed landing landmark council forestry.*service forestabish shoreline geologic forest.*stewardship lakewood aquatic.*structure survey perservativ woodneck woods.*hole usda forest.*service kirkwood toxic toxin barrier.*island water.*pollution beachwood treated.*timber treated.*wood hollywood wood.*neck barrier.*beach shorebird percent metals brentwood silverside loblolly contamin department.*of.*forest psu project.*park.*water forest.*comittee baywood aquatic.*inventory wood.*stove legend habitat.*conversion.*loss.*forest.*cover kelp.*forest table figure characterized.*as forest.*learning.*shelter vincent cdmo unnacceptable 15.*visitor wooden.*marco litter.*retard treated lumber rattle snake data timber creek timberneck timber support joist joe timberland |
| FEGS     | Viewscapes | Viewscapes | include   | view                                                                                                                                                                                                                                                                                                                                                                                                                                                                                                                                                                                                                                                                                                                                                                                                                                                                                                                                                                                                                                                                                                    |

| Category | Class      | SubClass   | Word_type | S2                                                                                                                                                                                                                                                                                                                                                                                                                                                                                                                                                                                                                                                                                                                                                                                                                                                                                    | S3                                                                                                                                                                                                                                                                                                                                                                                                                                                                                                                                                                                                                                                                                                                                                                                                                                                                                                                                                                                                                                                                                                                                                  |
|----------|------------|------------|-----------|---------------------------------------------------------------------------------------------------------------------------------------------------------------------------------------------------------------------------------------------------------------------------------------------------------------------------------------------------------------------------------------------------------------------------------------------------------------------------------------------------------------------------------------------------------------------------------------------------------------------------------------------------------------------------------------------------------------------------------------------------------------------------------------------------------------------------------------------------------------------------------------|-----------------------------------------------------------------------------------------------------------------------------------------------------------------------------------------------------------------------------------------------------------------------------------------------------------------------------------------------------------------------------------------------------------------------------------------------------------------------------------------------------------------------------------------------------------------------------------------------------------------------------------------------------------------------------------------------------------------------------------------------------------------------------------------------------------------------------------------------------------------------------------------------------------------------------------------------------------------------------------------------------------------------------------------------------------------------------------------------------------------------------------------------------|
| FEGS     | Substrate  | Substrate  | exclude   | thousand sandwich runoff sandy www conflict shifting practice manag propos<br>al permit contaminat pollut toxic toxin sandpiper sandplain state sandi sandy <br>permit report cranberry goal sander sanding study deposit project inform land<br>fill association council convert rsite document sewage uranium plutonium ame<br>ricium sand.*pond hard.*shoreline figure generat radio excavat sand.*dune sa<br>ndbass sand.*lance percent costsand durante.*park dnrec sand.*eel boring bar<br>rier.*island sand.*fencing sandy.*hook sand.*pit sand.*movement sandhill man<br>ag.*plan identify sand.*hill barrier.*beach 15.*visitor water<br>suppl disposal mining sandwich runoff sandwort sandine ersand esand dsand <br>sandy sanddune sand dune sandspur sander ssand sandwort sandpiper sand<br>filter esand dsand sand pine sandusky sand grass sandplain sandown thousand | locations.*study.*area restoration.*progress emerson.*point.*preserv durante.*p<br>ark dnrec identify oyster.*restoration.*field barrier.*island 15.*visitor                                                                                                                                                                                                                                                                                                                                                                                                                                                                                                                                                                                                                                                                                                                                                                                                                                                                                                                                                                                        |
| FEGS     | Timber     | Timber     | include   | wood harvest wood product forest product                                                                                                                                                                                                                                                                                                                                                                                                                                                                                                                                                                                                                                                                                                                                                                                                                                              | pine wood pulp tree timber oak  elm lumber cedar pine oak cypress  elm <br>ash maple hickory hardwood cordwood                                                                                                                                                                                                                                                                                                                                                                                                                                                                                                                                                                                                                                                                                                                                                                                                                                                                                                                                                                                                                                      |
| FEGS     | Timber     | Timber     | near      |                                                                                                                                                                                                                                                                                                                                                                                                                                                                                                                                                                                                                                                                                                                                                                                                                                                                                       | extract commercial business product industry commodity commodities harvest<br> profit buy livelihood job dealer market corporation sale sell income artisan p<br>rofession trade trading subsist tribal tribe indigenous.*people indian<br>population indian people indigenous.*cultur indigenous.*people indian<br>population indian people native.*person native american traditional<br>use traditional sustainable use sustenance goods                                                                                                                                                                                                                                                                                                                                                                                                                                                                                                                                                                                                                                                                                                         |
| FEGS     | Timber     | Timber     | exclude   |                                                                                                                                                                                                                                                                                                                                                                                                                                                                                                                                                                                                                                                                                                                                                                                                                                                                                       | street trademark braintree park woody lakewood kirkwood woodpecker woods<br>hole wood dock wood preserv woodneck woodbury wood stake wooden wood<br>tick woodland wood turtle tree frog woodbridge treated lumber treated<br>wood wood<br>stove reproduct horticultur agricultur alternativ aqua.*cultur monocultur non-<br>nativ cash category sewage sanitary acquatic management.*area fish mash wa<br>sh dnr mcbp trash shoreline pineda pinellas legend pine.*island pine.*barren <br>vash elmer elm st ashe coal<br>ash mash sash cash bash overwhelm oakdale oakley croak coal.*ash delmarva<br> fashion pineland barrier.*island water.*pollution soak pine.*beach over.*whel<br>med barrier.*beach ashore sand.*pine shorebird percent metals oakland silver<br>side hash develm hairstreak crash pine.*hills ocean.*pine oak.*harbor oak.*rid<br>ge pine.*seed sea grass freed mcreedy sea-<br>grass eelgrass oyster.*grass seagrass grassland sea-<br>grass decreed breed agreed haynes hay.*barn hayden cottonwood freed cotto<br>ntail reedgrass hayan salem mysella economus woodfern sandalwoods wood<br>satyr wood borer wood nymph |
| FEGS     | Viewscapes | Viewscapes | include   | view aesthetically pleasing                                                                                                                                                                                                                                                                                                                                                                                                                                                                                                                                                                                                                                                                                                                                                                                                                                                           | scenic scenery horizon skyline vantage point vistas observation<br>point observation deck observation platform observation area vista point scenic<br>vista natural vista beauty beautiful panorama panoramic viewscape view<br>scape idyllic                                                                                                                                                                                                                                                                                                                                                                                                                                                                                                                                                                                                                                                                                                                                                                                                                                                                                                       |

| Category | Class      | SubClass   | Word_type | S4                                                                                                                                                                                                                                      | S5                                                                                                                                                                                                                                                                         |
|----------|------------|------------|-----------|-----------------------------------------------------------------------------------------------------------------------------------------------------------------------------------------------------------------------------------------|----------------------------------------------------------------------------------------------------------------------------------------------------------------------------------------------------------------------------------------------------------------------------|
| FEGS     | Substrate  | Substrate  | exclude   | artificial substrate substrateg surface water surface flow surface-water soil sediment background groundwork groundwater impervious water quality groundcover ground cover lightning disposal middle ground middleground mining staging | artificial reef artificial substrate substrateg surface water surface flow surface-water database data base soil sediment background groundwork groundwater impervious water quality groundcover ground cover lightning disposal middle ground middleground mining staging |
| FEGS     | Timber     | Timber     | include   |                                                                                                                                                                                                                                         |                                                                                                                                                                                                                                                                            |
| FEGS     | Timber     | Timber     | near      |                                                                                                                                                                                                                                         |                                                                                                                                                                                                                                                                            |
| FEGS     | Timber     | Timber     | exclude   |                                                                                                                                                                                                                                         |                                                                                                                                                                                                                                                                            |
| FEGS     | Viewscapes | Viewscapes | include   | sight                                                                                                                                                                                                                                   | beautification                                                                                                                                                                                                                                                             |

| Category | Class      | SubClass   | Word_type | S6                                                  | S7                                              |
|----------|------------|------------|-----------|-----------------------------------------------------|-------------------------------------------------|
|          |            |            |           |                                                     |                                                 |
| FEGS     | Substrate  | Substrate  | exclude   |                                                     |                                                 |
| FEGS     | Timber     | Timber     | include   |                                                     |                                                 |
|          |            |            |           |                                                     |                                                 |
| FEGS     | Timber     | Timber     | near      |                                                     |                                                 |
|          |            |            |           |                                                     |                                                 |
| FEGS     | Timber     | Timber     | exclude   |                                                     |                                                 |
|          |            |            |           |                                                     |                                                 |
| FEGS     | Viewscapes | Viewscapes | include   | rolling hill   rolling farmland   rolling landscape | lush   majestic   aesthetic   visually pleasing |

| Category | Class      | SubClass   | Word_type | S8 | S9 |
|----------|------------|------------|-----------|----|----|
|          |            |            |           |    |    |
| FEGS     | Substrate  | Substrate  | exclude   |    |    |
| FEGS     | Timber     | Timber     | include   |    |    |
|          |            |            |           |    |    |
| FEGS     | Timber     | Timber     | near      |    |    |
|          |            |            |           |    |    |
| FEGS     | Timber     | Timber     | exclude   |    |    |
|          |            |            |           |    |    |
| FEGS     | Viewscapes | Viewscapes | include   |    |    |

| Category | Class      | SubClass   | Word_type | S10 | S11 |
|----------|------------|------------|-----------|-----|-----|
|          |            |            |           |     |     |
| FEGS     | Substrate  | Substrate  | exclude   |     |     |
| FEGS     | Timber     | Timber     | include   |     |     |
|          |            |            |           |     |     |
| FEGS     | Timber     | Timber     | near      |     |     |
|          |            |            |           |     |     |
| FEGS     | Timber     | Timber     | exclude   |     |     |
|          |            |            |           |     |     |
| FEGS     | Viewscapes | Viewscapes | include   |     |     |

| Category | Class      | SubClass   | Word_type | S12 | S13 |
|----------|------------|------------|-----------|-----|-----|
|          |            |            |           |     |     |
| FEGS     | Substrate  | Substrate  | exclude   |     |     |
| FEGS     | Timber     | Timber     | include   |     |     |
|          |            |            |           |     |     |
| FEGS     | Timber     | Timber     | near      |     |     |
|          |            |            |           |     |     |
| FEGS     | Timber     | Timber     | exclude   |     |     |
|          |            |            |           |     |     |
| FEGS     | Viewscapes | Viewscapes | include   |     |     |

| Category | Class      | SubClass   | Word_type | S1                                                                                                                                                                                                                                                                                                                                                                                                                                                                                                                                                                                                                                                                                                                                                                                                                                                                                                                                                                                                                                                                                                                                                                                                                                                                                                                                                                                                                  |
|----------|------------|------------|-----------|---------------------------------------------------------------------------------------------------------------------------------------------------------------------------------------------------------------------------------------------------------------------------------------------------------------------------------------------------------------------------------------------------------------------------------------------------------------------------------------------------------------------------------------------------------------------------------------------------------------------------------------------------------------------------------------------------------------------------------------------------------------------------------------------------------------------------------------------------------------------------------------------------------------------------------------------------------------------------------------------------------------------------------------------------------------------------------------------------------------------------------------------------------------------------------------------------------------------------------------------------------------------------------------------------------------------------------------------------------------------------------------------------------------------|
| FEGS     | Viewscapes | Viewscapes | near      | <p>accomodat activit aesthetic amenable amenit appreciat artisan artist asset attract beaut beneficial benefit bequest bountiful bounty business buy care caring charisma cherish children collect comfort commercial commodities commodity goods concern conserv corporation critical dealer delicious desired desirable destination econom edible educat encourag endangered enhance enhancing enjoy encounter enthusiast experienc exploit extract families favorable favor feel festiv ceremon fur furs fur-bear fur</p> <p>bear furbear future gather generation hallmark harvest healthy heritage hide hunt income indigenous.*people indian population indian people indigenous.*person industry initiative inspir interest job learn legacy leisure livelihood market meat native.*person native american observ opportunit participant participate pelt pick pleasant popular preserv products profession profit promote promotion purpose protect quality.*life rare recreat relax resource restor sale save saving sell sight skins special specimen spectacular sport steward subsist sustenance threatened together tours trade trading sustainabl tradition treasure tribal tribe unique valuable value valuing view visit visitor watch well suited well-suited wonder allure alluring mystique option value lifeblood jewel extraordinary excellent amaze amazing stunning majestic spectacular</p> |
| FEGS     | Viewscapes | Viewscapes | exclude   | <p>riverview viewcontent views as issues target view view.*data points of view elevation view known view view this document seek the view solicit the view reflect the view review bayview interview data.*network aesthetic.*nuisance aesthetic.*problem aesthetic.*degradation vista.*hermosa vistamar views.*agency views.*department sewage.*collection aerial.*view.*modif 15.*visitor treatment keep.*louisiana regulation program.*beautification beautification.*program inspir.*problem inspir.*strateg program.*inspire.*action conference.*inspir tool.*inspir siberian chamisso sandwort pondweed goal success.*inspir legislat meadowbeauty educat.*inspir mission initiative agency.*funding slough program slough 15.*visitor plankton.*reduce ad.*hoc inspir.*steward inspir.*teach beautyberry Harper.*beauty meadow-beauty overview in view of over-view over-view viewed our view species viewer wildlife viewing point of view exhibit landscape design landscape ecology built landscape landscaper purview viewpoint view point negative view their views landscape scale landscape perspective saalem mysella eonomus</p>                                                                                                                                                                                                                                                                    |
| FEGS     | Water      | Water      | include   | <p>rain.*garden rain.*barrel store.*rain rain.*store storage.*rain rain.*storage cistern water resource water source water use water usage water conservation conserve water water shortage water storage water demand rainwater harvest water supply water-supply water demand demand for water demands for water water well supply well municipal well domestic well private well public well artesian well shallow well groundwater well water withdraw receiving water bod reclaimed water reclaim water water reclamation water pump clean water clean air and water wastewater.*compliance</p>                                                                                                                                                                                                                                                                                                                                                                                                                                                                                                                                                                                                                                                                                                                                                                                                                |
| FEGS     | Water      | Water      | near      |                                                                                                                                                                                                                                                                                                                                                                                                                                                                                                                                                                                                                                                                                                                                                                                                                                                                                                                                                                                                                                                                                                                                                                                                                                                                                                                                                                                                                     |
| FEGS     | Water      | Water      | exclude   | <p>swells wells reserve wells bay town of wells clean water act sundew</p>                                                                                                                                                                                                                                                                                                                                                                                                                                                                                                                                                                                                                                                                                                                                                                                                                                                                                                                                                                                                                                                                                                                                                                                                                                                                                                                                          |
| FEGS     | Weather    | Weather    | include   | <p>weather climate precipitation temperature rain snow sun cloud summer fall winter spring autumn heat humid</p>                                                                                                                                                                                                                                                                                                                                                                                                                                                                                                                                                                                                                                                                                                                                                                                                                                                                                                                                                                                                                                                                                                                                                                                                                                                                                                    |
| FEGS     | Weather    | Weather    | near      | <p>comfort desirable destination enjoy favorable pleasant popular relax special spectacular tours treasure well suited well-suited wonder allure alluring mystique extraordinary excellent amaze amazing stunning majestic spectacular condition moderate mild</p>                                                                                                                                                                                                                                                                                                                                                                                                                                                                                                                                                                                                                                                                                                                                                                                                                                                                                                                                                                                                                                                                                                                                                  |

| Category | Class      | SubClass   | Word_type | S2                                                                                                                                                                                                                                                                                                                                                                                                                                                                                                                                                                                                                                                                                                                                                                                                                                                                                                                                                                                                                                                                                                                                                | S3                                                                                                                                                                                                                                                                                                                                                                                                                                                     |
|----------|------------|------------|-----------|---------------------------------------------------------------------------------------------------------------------------------------------------------------------------------------------------------------------------------------------------------------------------------------------------------------------------------------------------------------------------------------------------------------------------------------------------------------------------------------------------------------------------------------------------------------------------------------------------------------------------------------------------------------------------------------------------------------------------------------------------------------------------------------------------------------------------------------------------------------------------------------------------------------------------------------------------------------------------------------------------------------------------------------------------------------------------------------------------------------------------------------------------|--------------------------------------------------------------------------------------------------------------------------------------------------------------------------------------------------------------------------------------------------------------------------------------------------------------------------------------------------------------------------------------------------------------------------------------------------------|
| FEGS     | Viewscapes | Viewscapes | near      | natur environment ecosystem estuar coastal landscape ocean shore beach water forest woodland grass green farmland hills mountain wetland creek river stream lake pond                                                                                                                                                                                                                                                                                                                                                                                                                                                                                                                                                                                                                                                                                                                                                                                                                                                                                                                                                                             |                                                                                                                                                                                                                                                                                                                                                                                                                                                        |
| FEGS     | Viewscapes | Viewscapes | exclude   | viewcontent views as issues target view view.*data points of view elevation view known view view this document seek the view solicit the view reflect the view review bayview interview data.*network aesthetic.*nuisance aesthetic.*problem aesthetic.*degradation vista.*hermosa vistamar views.*agency views.*department sewage.*collection aerial.*view.*modif 15.*visitor treatment keep.*lo uisiana regulation program.*beautification beautification.*program inspir.*problem inspir.*strateg program.*inspire.*action conference.*inspir tool.*inspir siberian chamisso sandwort pondweed goal success.*inspir legislat meadowbeauty educat.*inspir mission initiative agency.*funding slough program slough 15.*visit or plankton.*reduce ad.*hoc inspir.*steward inspir.*teach beautyberry Harper.*beauty meadow-beauty overview in view of over-view over-view viewed our view species viewer wildlife viewing point of view view the views the chula vista viewing exhibit landscape design landscape ecology built landscape landscaper purview viewpoint view point negative view their views landscape scale landscape perspective | meadow beauty river beauty beautiful jacob spring beauty meadow                                                                                                                                                                                                                                                                                                                                                                                        |
| FEGS     | Water      | Water      | include   | water stream river creek estuar bay reservoir lake                                                                                                                                                                                                                                                                                                                                                                                                                                                                                                                                                                                                                                                                                                                                                                                                                                                                                                                                                                                                                                                                                                | aquifer hydro elect hydroelect hydro-elect hydropower hydro-power dam.*electric electric.*dam cooling system energy.*dam dam.*energy                                                                                                                                                                                                                                                                                                                   |
| FEGS     | Water      | Water      | near      | subsist drink intake                                                                                                                                                                                                                                                                                                                                                                                                                                                                                                                                                                                                                                                                                                                                                                                                                                                                                                                                                                                                                                                                                                                              |                                                                                                                                                                                                                                                                                                                                                                                                                                                        |
| FEGS     | Water      | Water      | exclude   | stormwater sample evaluat collectively ordinance disposal demonstrat data m onitor watershed waterfowl watershed wastewater permit division.*water water supply paper sundew                                                                                                                                                                                                                                                                                                                                                                                                                                                                                                                                                                                                                                                                                                                                                                                                                                                                                                                                                                      |                                                                                                                                                                                                                                                                                                                                                                                                                                                        |
| FEGS     | Weather    | Weather    | include   | sunbath sun bath sun-bath seasonal visitor                                                                                                                                                                                                                                                                                                                                                                                                                                                                                                                                                                                                                                                                                                                                                                                                                                                                                                                                                                                                                                                                                                        | fog                                                                                                                                                                                                                                                                                                                                                                                                                                                    |
| FEGS     | Weather    | Weather    | near      |                                                                                                                                                                                                                                                                                                                                                                                                                                                                                                                                                                                                                                                                                                                                                                                                                                                                                                                                                                                                                                                                                                                                                   | form generate create add scenic special aesthetic view visual scene scenic inspir relax gaze gazing enjoy special unique charisma enjoy preserv view beauty bounty bountiful observ benefit recreat valuable watch tours aesthetic value rare relax attract scenic sight restore resource protect asset special participant amenit desirable pleasant healthy hallmark recreat opportunit experien enjoy relax families family children visitor touris |

| Category | Class      | SubClass   | Word_type | S4                                                                                                                                                                                                                                                                                                                                                                                                                                                                                                                                                                         | S5 |
|----------|------------|------------|-----------|----------------------------------------------------------------------------------------------------------------------------------------------------------------------------------------------------------------------------------------------------------------------------------------------------------------------------------------------------------------------------------------------------------------------------------------------------------------------------------------------------------------------------------------------------------------------------|----|
| FEGS     | Viewscapes | Viewscapes | near      | comfort desirable destination enjoy favorable pleasant popular relax special spectacular tours treasure well suited well-suited wonder allure alluring mystique extraordinary excellent amaze amazing stunning majestic spectacular scenic pleasing                                                                                                                                                                                                                                                                                                                        |    |
| FEGS     | Viewscapes | Viewscapes | exclude   | /beauty meadow-beauty horizontal deepwater horizon may be overlooked overlook.*concern beautyberry Harper.*beauty                                                                                                                                                                                                                                                                                                                                                                                                                                                          |    |
| FEGS     | Water      | Water      | include   | water stream river creek estuar bay marina boat ship the sound wetland marine reservoir lake           water stream river creek estuar bay recreation discharg enjoy moor charter tours cruise port harbor access traffic channel canal launch reservoir lake                                                                                                                                                                                                                                                                                                              |    |
| FEGS     | Water      | Water      | near      | discharge emission point source dilute dilution TMDL daily load ballast divert dispos.*material dispos.*waste waste.*dispos material.*dispos dredg.*dispos dispos.*dredg dispos.*debris debris.*dispos place.*dredge dredge.*place placing.*dredg dredg.*placing pollution from contamin.*load pollut.*load sediment.*load dump.*dredg dredg.*dump effluent           boat ship vessel ferry paddle                                                                                                                                                                        |    |
| FEGS     | Water      | Water      | exclude   | stormwater spoil deposition sediment.*deposition deposition.*sediment stormwater sample evaluation collectively ordinance demonstrat data monitor watershed waterfowl division.*water water supply paper pumpout pump out stewardship partnership waterfowl ownership relationship leadership sponsorship township membership shipped rship nship zostera sundew           stewardship partnership waterfowl ownership relationship leadership sponsorship township membership shipped rship nship support harbor seal new bedford harbor bight sundew boat-tailed grackle |    |
| FEGS     | Weather    | Weather    | include   |                                                                                                                                                                                                                                                                                                                                                                                                                                                                                                                                                                            |    |
| FEGS     | Weather    | Weather    | near      |                                                                                                                                                                                                                                                                                                                                                                                                                                                                                                                                                                            |    |

| Category | Class      | SubClass   | Word_type | S6                                                                                                                                                                                            | S7                                                                                                                                                                    |
|----------|------------|------------|-----------|-----------------------------------------------------------------------------------------------------------------------------------------------------------------------------------------------|-----------------------------------------------------------------------------------------------------------------------------------------------------------------------|
| FEGS     | Viewscapes | Viewscapes | near      |                                                                                                                                                                                               | natur environment ecosystem estuar coastal landscape ocean shore beach water forest woodland grass green farmland hills mountain wetland creek river stream lake pond |
| FEGS     | Viewscapes | Viewscapes | exclude   |                                                                                                                                                                                               | flush plush ilush slush visualize                                                                                                                                     |
| FEGS     | Water      | Water      | include   | water.*receiv ocean.*receiv bay.*receiv receiv.*water receiv.*ocean receiv.*bay stream.*receiv receiv.*stream river.*receiv receiv.*river lake.*receiv receiv.*lake pond.*receiv receiv.*pond | irrigat watercraft sailboat tugboat jetski kayak canoe boating boater shipping channel stream channel                                                                 |
| FEGS     | Water      | Water      | near      | dischar pollut waste contaminant effluent                                                                                                                                                     |                                                                                                                                                                       |
| FEGS     | Water      | Water      | exclude   | sundew                                                                                                                                                                                        | volcano                                                                                                                                                               |
| FEGS     | Weather    | Weather    | include   |                                                                                                                                                                                               |                                                                                                                                                                       |
| FEGS     | Weather    | Weather    | near      |                                                                                                                                                                                               |                                                                                                                                                                       |

| Category | Class      | SubClass   | Word_type | S8                                                                                                                                                                                                                                                                                                                                                            | S9                                                                   |
|----------|------------|------------|-----------|---------------------------------------------------------------------------------------------------------------------------------------------------------------------------------------------------------------------------------------------------------------------------------------------------------------------------------------------------------------|----------------------------------------------------------------------|
| FEGS     | Viewscapes | Viewscapes | near      |                                                                                                                                                                                                                                                                                                                                                               |                                                                      |
| FEGS     | Viewscapes | Viewscapes | exclude   |                                                                                                                                                                                                                                                                                                                                                               |                                                                      |
| FEGS     | Water      | Water      | include   | water                                                                                                                                                                                                                                                                                                                                                         | water stream river creek estuar channel canal wetland reservoir lake |
| FEGS     | Water      | Water      | near      | promot.*research research.*promot promot.*science science.*promot science.*potential potential.*science research.*potential potential.*research science.*purpose purpose.*science research.*purpose purpose.*research improve.*knowledge enhance.*knowledge knowledge.*improve knowledge.*enhance improve.*learn enhance.*learn learn.*improve learn.*enhance | navigat navigab transport                                            |
| FEGS     | Water      | Water      | exclude   | stormwater watershed wastewater sundew                                                                                                                                                                                                                                                                                                                        | sundew                                                               |
| FEGS     | Weather    | Weather    | include   |                                                                                                                                                                                                                                                                                                                                                               |                                                                      |
| FEGS     | Weather    | Weather    | near      |                                                                                                                                                                                                                                                                                                                                                               |                                                                      |

| Category | Class      | SubClass   | Word_type | S10                                                                                                                                                           | S11                                                            |
|----------|------------|------------|-----------|---------------------------------------------------------------------------------------------------------------------------------------------------------------|----------------------------------------------------------------|
| FEGS     | Viewscapes | Viewscapes | near      |                                                                                                                                                               |                                                                |
|          |            |            |           |                                                                                                                                                               |                                                                |
| FEGS     | Viewscapes | Viewscapes | exclude   |                                                                                                                                                               |                                                                |
|          |            |            |           |                                                                                                                                                               |                                                                |
| FEGS     | Water      | Water      | include   | snorkel SCUBA swim swam wade diving dive diver wading bather bathing                                                                                          | stream river creek estuar channel canal wetland reservoir lake |
| FEGS     | Water      | Water      | near      |                                                                                                                                                               |                                                                |
|          |            |            |           | livestock.*water water.*livestock cattle.*water cattle.*livestock                                                                                             |                                                                |
| FEGS     | Water      | Water      | exclude   | diversi diverse divert biodiversity diving.*duck wastewater steelhead diversion flock spoonbill egret waterfowl wading bird swamp kwader diverg swimming crab |                                                                |
|          |            |            |           |                                                                                                                                                               |                                                                |
| FEGS     | Weather    | Weather    | include   |                                                                                                                                                               |                                                                |
| FEGS     | Weather    | Weather    | near      |                                                                                                                                                               |                                                                |
|          |            |            |           |                                                                                                                                                               |                                                                |

| Category | Class      | SubClass   | Word_type | S12                              | S13                                          |
|----------|------------|------------|-----------|----------------------------------|----------------------------------------------|
|          |            |            |           |                                  |                                              |
| FEGS     | Viewscapes | Viewscapes | near      |                                  |                                              |
|          |            |            |           |                                  |                                              |
| FEGS     | Viewscapes | Viewscapes | exclude   |                                  |                                              |
| FEGS     | Water      | Water      | include   | water                            | wastewater water.*discharge discharge.*water |
|          |            |            |           |                                  |                                              |
| FEGS     | Water      | Water      | near      | protect conserv preserv effluent | compliance compliant                         |
|          |            |            |           |                                  |                                              |
| FEGS     | Water      | Water      | exclude   | sundew watershed waterfowl       |                                              |
| FEGS     | Weather    | Weather    | include   |                                  |                                              |
|          |            |            |           |                                  |                                              |
| FEGS     | Weather    | Weather    | near      |                                  |                                              |

| Category | Class   | SubClass | Word_type | S1                                                                                                                                                                                                                                                                                                                                                                                                                                                                                                                                                                                                                                                                                                                                                                                                                                                                                                                                                                                                                                                                                                                                                                                                                                                                                                                                                                                                                                                                                                                                                                                                                                                                                                                                                                                                                                                                                                                                                                                                                                                                                                                                                                                                                                                                                                                                                                                                                                                                        |
|----------|---------|----------|-----------|---------------------------------------------------------------------------------------------------------------------------------------------------------------------------------------------------------------------------------------------------------------------------------------------------------------------------------------------------------------------------------------------------------------------------------------------------------------------------------------------------------------------------------------------------------------------------------------------------------------------------------------------------------------------------------------------------------------------------------------------------------------------------------------------------------------------------------------------------------------------------------------------------------------------------------------------------------------------------------------------------------------------------------------------------------------------------------------------------------------------------------------------------------------------------------------------------------------------------------------------------------------------------------------------------------------------------------------------------------------------------------------------------------------------------------------------------------------------------------------------------------------------------------------------------------------------------------------------------------------------------------------------------------------------------------------------------------------------------------------------------------------------------------------------------------------------------------------------------------------------------------------------------------------------------------------------------------------------------------------------------------------------------------------------------------------------------------------------------------------------------------------------------------------------------------------------------------------------------------------------------------------------------------------------------------------------------------------------------------------------------------------------------------------------------------------------------------------------------|
|          |         |          |           | <p> theat train winter salt marsh rainwater kill sundew sunny fall river freshwater spring falls within staff summer<br/> camp worker sunken program session employ wave climate wintering fallout summer flounder winter flounder outfall attractant fall below fall within fall<br/> under offseason off-season wintergreen spring beauty climate change changing climate climate<br/> adapt analysis study temperature.*water water.*temperature stream.*temperature temperature.*stream temperature.*impaired impaired.*temperature climate.*ad<br/> t temperature.*managed managed.*temperature weather.*station collect.*rain map lumber.*landing landmark growing.*season.*moss water.*collect 15.*visitor tra<br/> in drain brain grain plover Commission season.*fire fire.*season touris.*season season.*touris especially specialty monitor data egret season.*fish fish.*seaso<br/> n management rain garden raingarden closure hunt.*season season.*hun seasonal wetland all.*weather terrain rainbow rainier workshop suisun block<br/> sun Sunday unit sunfish sunrise sunset tsunami sundown clouded cloud.*water turbid sunset of sunset on biofog to<br/> sunset image imaging clouded navigat sunset of sunset on sunset in sunsets on sunsets in infog turbid cloud.*water rainbow snake cloudberry after<br/> sunset rainbow star rainbow surf sunset at before sunset mccloud agency askin pickerel by-product byproduct by<br/> product chid entrap strap sediment.*trap contam.*trap pollut.*trap trap.*contam trap.*pollut nutrient.*trap trap.*nutrient sand.*trap trap.*sand trap.*sedim<br/> ent litter trap fish trap especial power.*generation electric.*generation generation plant generation facilit laboratory observ field observ lab observ special<br/> issue meadow beauty river beauty beautiful jacob spring beauty beautyberry carex carey personal care careo aquarium care lawn<br/> care careful exotic extrapolat askin pickerel invasive species iskin nuisance species overview in view of over-view over-<br/> view peltandra pelti pelto apelt peltu pelta pelte provid.*no clue provid.*notice provid.*basis provid.*expertise rarely temperature value biomass<br/> value nonprofit non-profit refur review bayview sensitive fern shunt huntley huntington hunterdon sking salem mysella economus newmarket skink skin<br/> lesion skin condition strap sulfur specialist tradeoff trade-off transport workshop </p> |
| FEGS     | Weather | Weather  | exclude   |                                                                                                                                                                                                                                                                                                                                                                                                                                                                                                                                                                                                                                                                                                                                                                                                                                                                                                                                                                                                                                                                                                                                                                                                                                                                                                                                                                                                                                                                                                                                                                                                                                                                                                                                                                                                                                                                                                                                                                                                                                                                                                                                                                                                                                                                                                                                                                                                                                                                           |
| FEGS     | Wind    | Wind     | include   | wind                                                                                                                                                                                                                                                                                                                                                                                                                                                                                                                                                                                                                                                                                                                                                                                                                                                                                                                                                                                                                                                                                                                                                                                                                                                                                                                                                                                                                                                                                                                                                                                                                                                                                                                                                                                                                                                                                                                                                                                                                                                                                                                                                                                                                                                                                                                                                                                                                                                                      |
| FEGS     | Wind    | Wind     | near      | boat surfer surfing energy electric power sport turbine                                                                                                                                                                                                                                                                                                                                                                                                                                                                                                                                                                                                                                                                                                                                                                                                                                                                                                                                                                                                                                                                                                                                                                                                                                                                                                                                                                                                                                                                                                                                                                                                                                                                                                                                                                                                                                                                                                                                                                                                                                                                                                                                                                                                                                                                                                                                                                                                                   |
| FEGS     | Wind    | Wind     | exclude   | windscreen dwind window real.*time.*system sediment data tax.*credit bottle defense energy.*transfer mooring wind.*erosion pollut gis wind.*biolog abso<br>b.*wind overflow xxxxxxx 15.*visitor stratification stratify circulate mixing circulation                                                                                                                                                                                                                                                                                                                                                                                                                                                                                                                                                                                                                                                                                                                                                                                                                                                                                                                                                                                                                                                                                                                                                                                                                                                                                                                                                                                                                                                                                                                                                                                                                                                                                                                                                                                                                                                                                                                                                                                                                                                                                                                                                                                                                      |

| Category | Class   | SubClass | Word_type | S2                                                                    | S3 |
|----------|---------|----------|-----------|-----------------------------------------------------------------------|----|
|          |         |          |           |                                                                       |    |
| FEGS     | Weather | Weather  | exclude   | biofog pollution pollutant climate temperature navigation 15.*visitor |    |
| FEGS     | Wind    | Wind     | include   | fly.*kite kite.*fly kite surf                                         |    |
| FEGS     | Wind    | Wind     | near      |                                                                       |    |
| FEGS     | Wind    | Wind     | exclude   | butterfly white-tailed kite                                           |    |

| Category | Class   | SubClass | Word_type | S4 | S5 |
|----------|---------|----------|-----------|----|----|
|          |         |          |           |    |    |
| FEGS     | Weather | Weather  | exclude   |    |    |
| FEGS     | Wind    | Wind     | include   |    |    |
| FEGS     | Wind    | Wind     | near      |    |    |
| FEGS     | Wind    | Wind     | exclude   |    |    |

| Category | Class   | SubClass | Word_type | S6 | S7 |
|----------|---------|----------|-----------|----|----|
|          |         |          |           |    |    |
| FEGS     | Weather | Weather  | exclude   |    |    |
| FEGS     | Wind    | Wind     | include   |    |    |
| FEGS     | Wind    | Wind     | near      |    |    |
| FEGS     | Wind    | Wind     | exclude   |    |    |

| Category | Class   | SubClass | Word_type | S8 | S9 |
|----------|---------|----------|-----------|----|----|
|          |         |          |           |    |    |
| FEGS     | Weather | Weather  | exclude   |    |    |
| FEGS     | Wind    | Wind     | include   |    |    |
| FEGS     | Wind    | Wind     | near      |    |    |
| FEGS     | Wind    | Wind     | exclude   |    |    |

| Category | Class   | SubClass | Word_type | S10 | S11 |
|----------|---------|----------|-----------|-----|-----|
|          |         |          |           |     |     |
| FEGS     | Weather | Weather  | exclude   |     |     |
| FEGS     | Wind    | Wind     | include   |     |     |
| FEGS     | Wind    | Wind     | near      |     |     |
| FEGS     | Wind    | Wind     | exclude   |     |     |

| Category | Class   | SubClass | Word_type | S12 | S13 |
|----------|---------|----------|-----------|-----|-----|
|          |         |          |           |     |     |
| FEGS     | Weather | Weather  | exclude   |     |     |
| FEGS     | Wind    | Wind     | include   |     |     |
| FEGS     | Wind    | Wind     | near      |     |     |
| FEGS     | Wind    | Wind     | exclude   |     |     |
